# Supplementary material for: Mitochondrial Transplantation Promotes Protective Effector and Memory CD4+ T Cell Response During Mycobacterium Tuberculosis Infection and Diminishes Exhaustion and Senescence in Elderly CD4+ T cells
Source: PubMed Central journal article supplement (PMC11423092; doi:10.1002/advs.202401077), 2024-07-22
Supplement: ADVS-11-2401077-s001.pdf [file ADVS-11-2401077-s001.pdf]

## Supporting Information

for *Adv. Sci.*, DOI 10.1002/adv.202401077

Mitochondrial Transplantation Promotes Protective Effector and Memory CD4<sup>+</sup> T Cell Response During *Mycobacterium Tuberculosis* Infection and Diminishes Exhaustion and Senescence in Elderly CD4<sup>+</sup> T cells

*Colwyn A. Headley, Shalini Gautam, Angelica Olmo-Fontanez, Andreu Garcia-Vilanova, Varun Dwivedi, Alyssa Schami, Susan Weintraub, Philip S. Tsao, Jordi B. Torrelles\* and Joanne Turner\**

○ Elderly CD4<sup>+</sup> T Cells (E-CD4<sup>+</sup> T Cells)

● Elderly CD4<sup>+</sup> T Cells + Mito-Transfer (EM-CD4<sup>+</sup> T Cells)

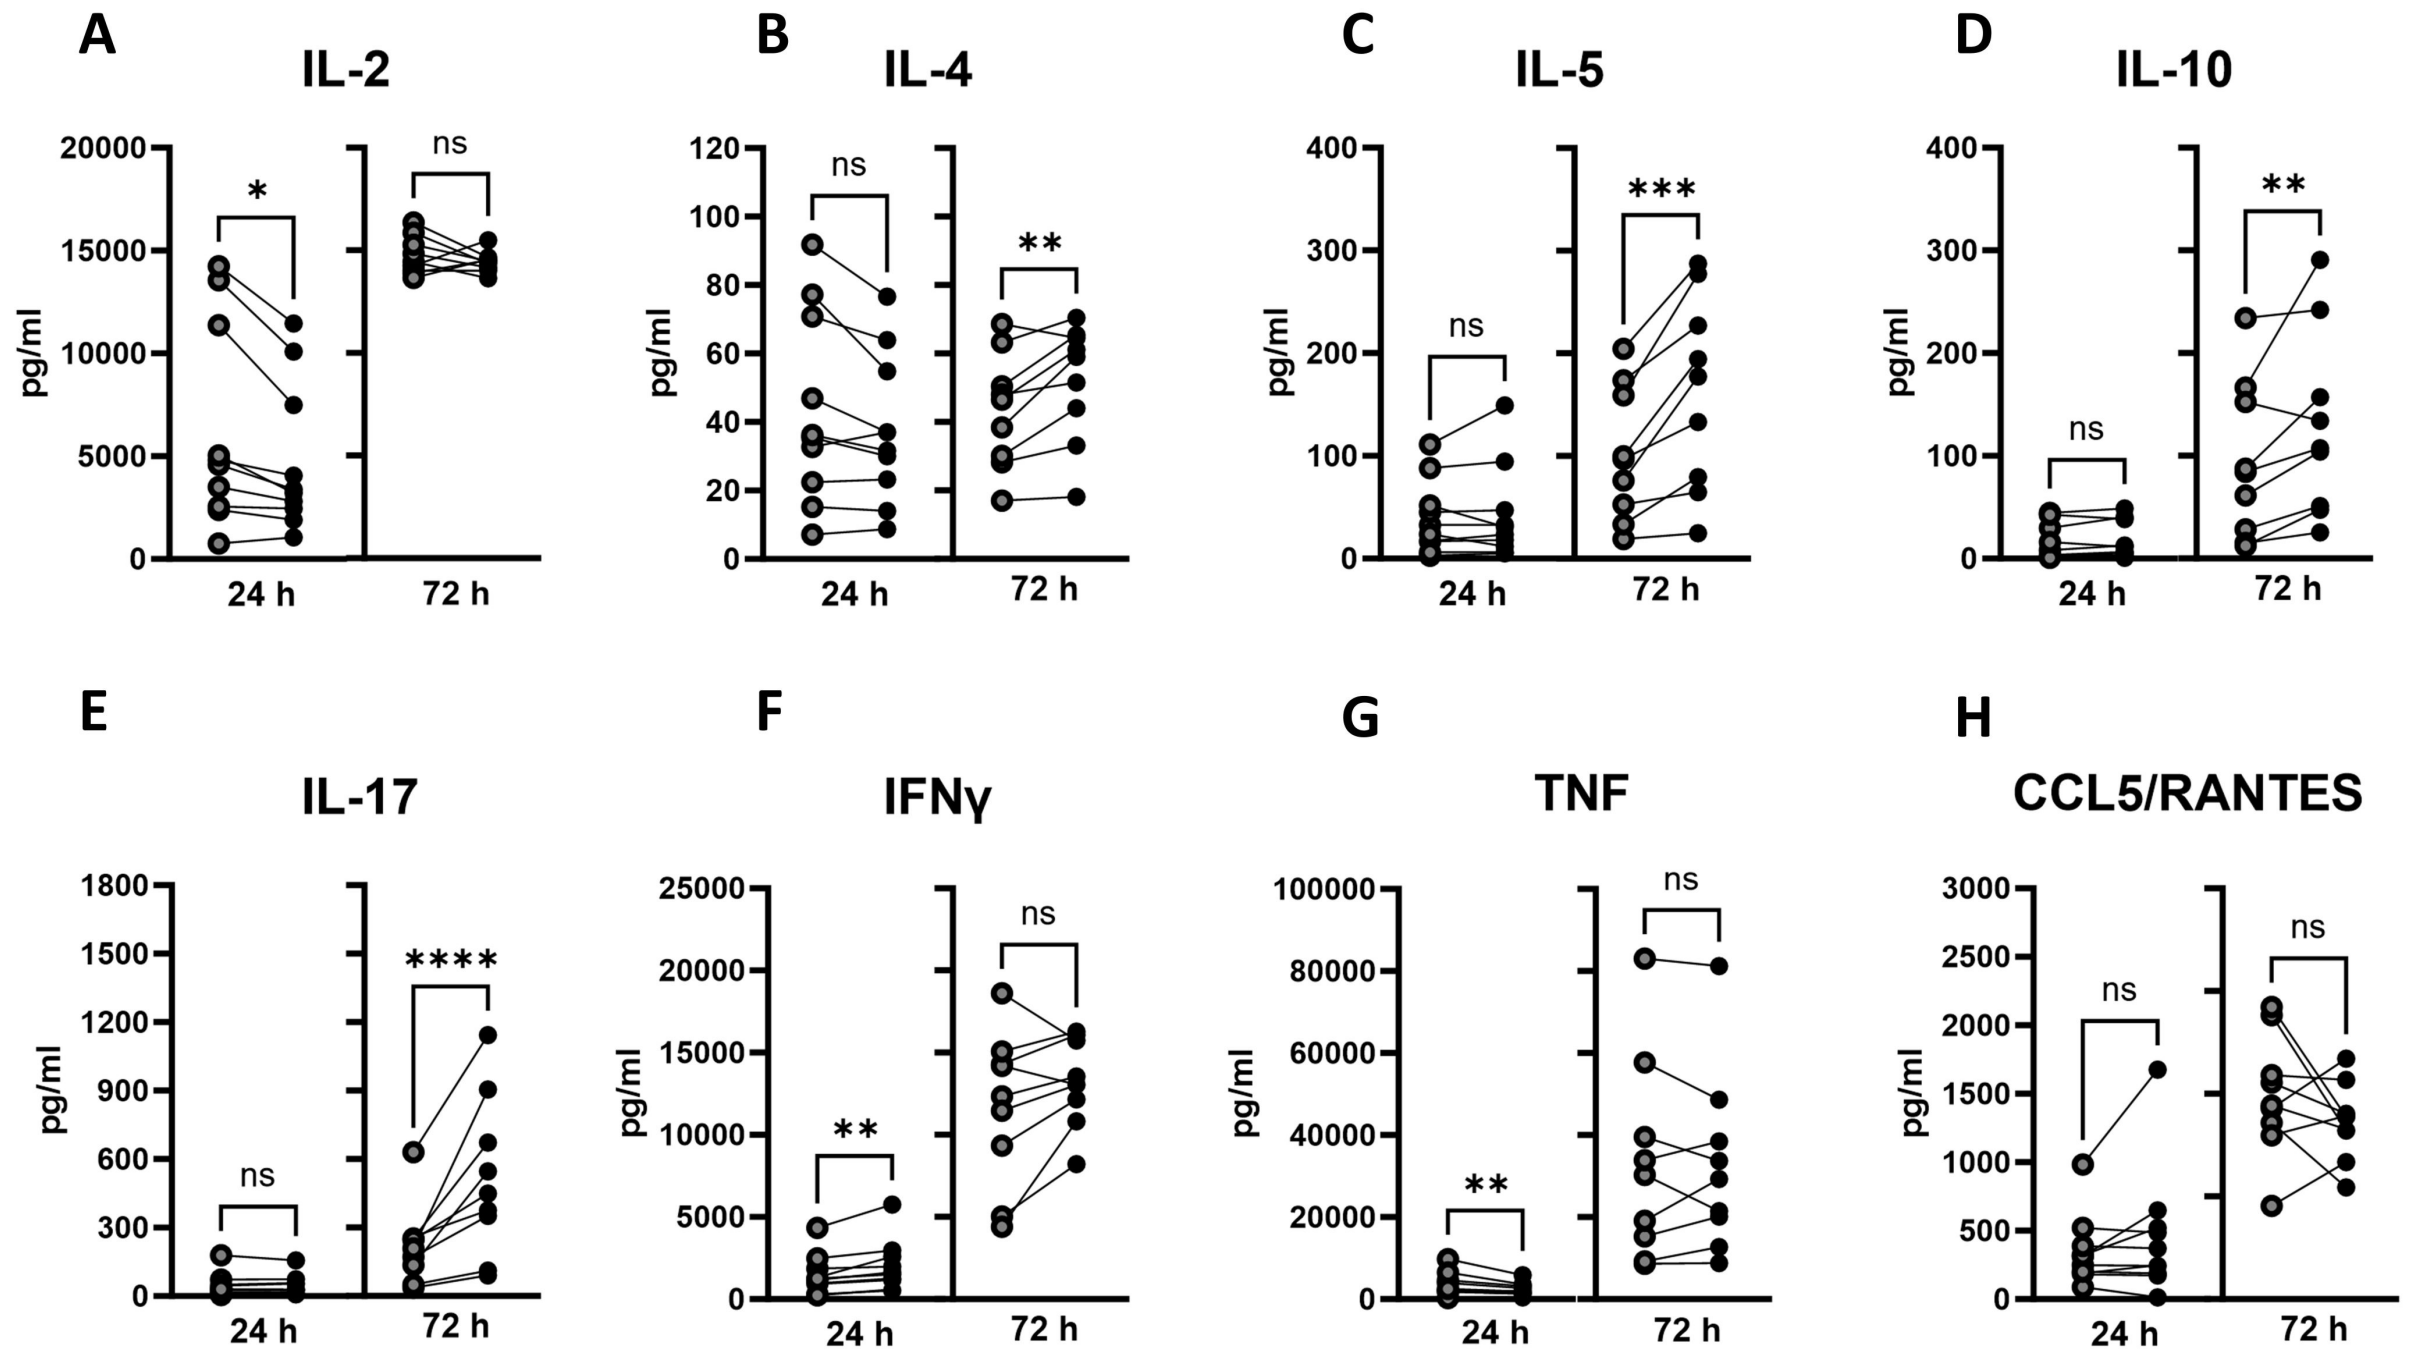

**Supp. Fig. 1. Mito-transfer alters cytokine production of CD4+ T cells in aged humans.** CD4+ T cells from aged humans with or without mito-transfer were stimulated with PMA/Ionomycin. After 24h and 72h stimulation with PMA/Ionomycin, the supernatants were examined by Luminex array for cytokines produced. 9-10 biological replicates per group with  $p \leq 0.05 = *$ ,  $p \leq 0.01 = **$ , or  $p \leq 0.001 = ***$  using paired Student's *t*-test.

○ Elderly CD4<sup>+</sup> T Cells (E-CD4<sup>+</sup> T Cells)

● Elderly CD4<sup>+</sup> T Cells + Mito-Transfer (EM-CD4<sup>+</sup> T Cells)

*Single Stim.*

**A**

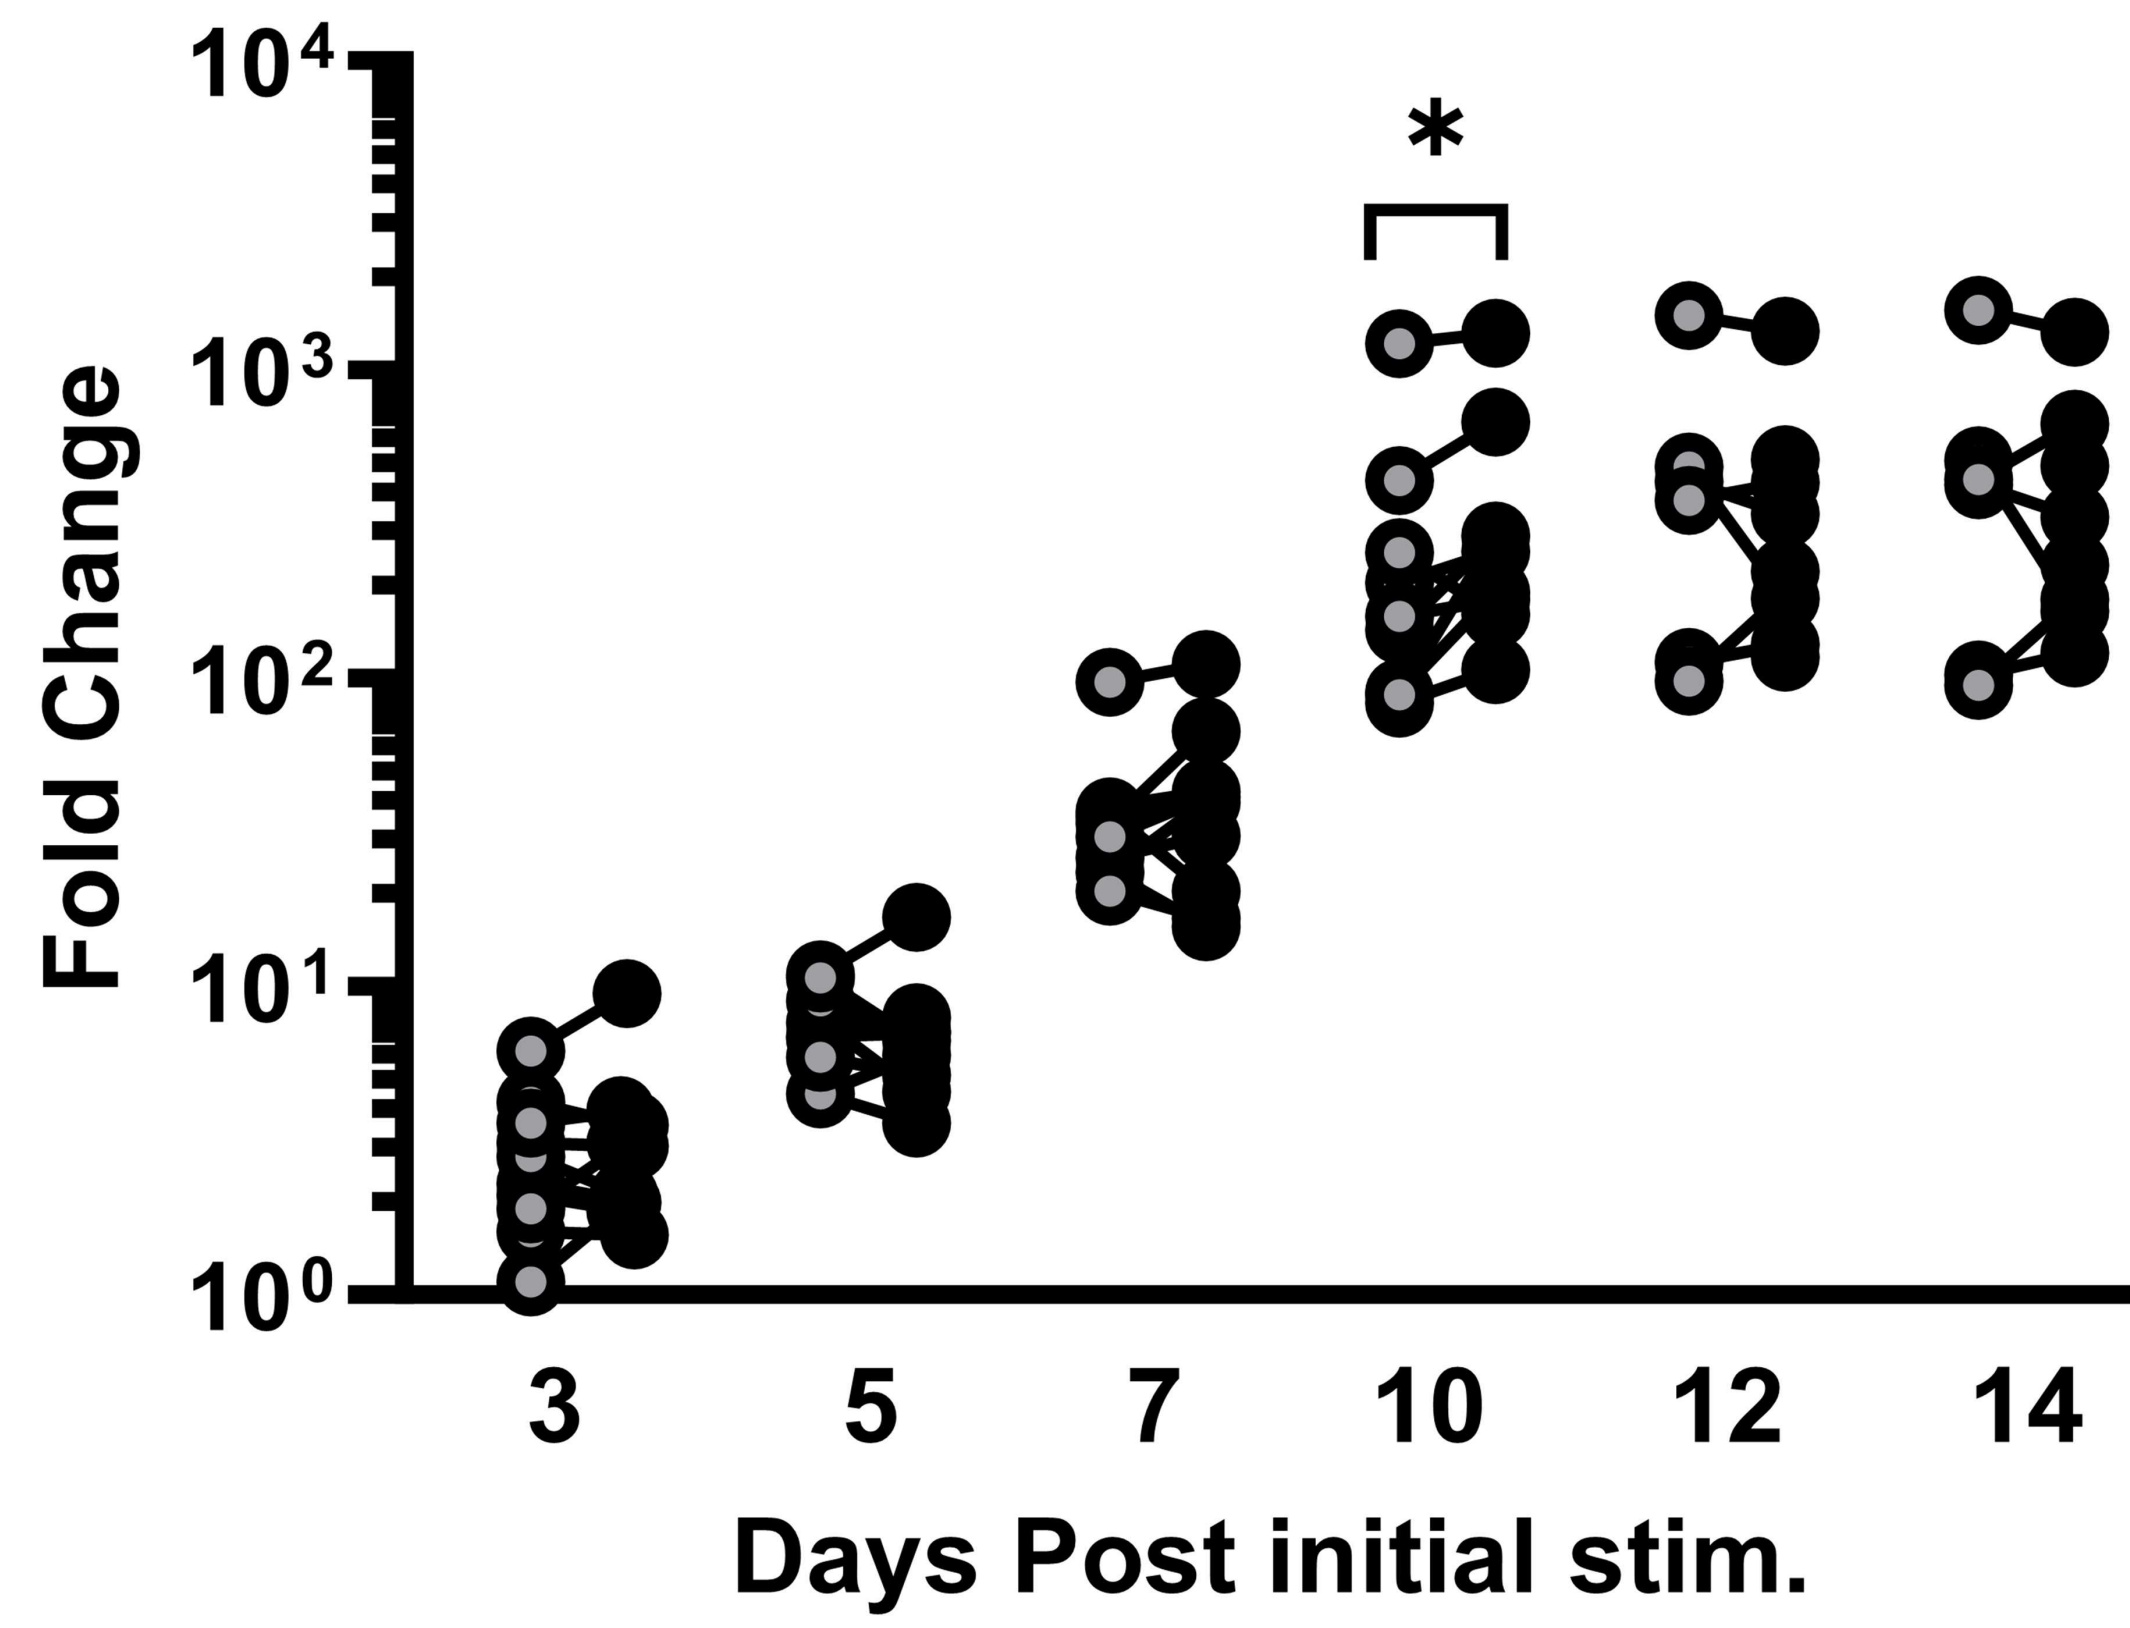

**B**

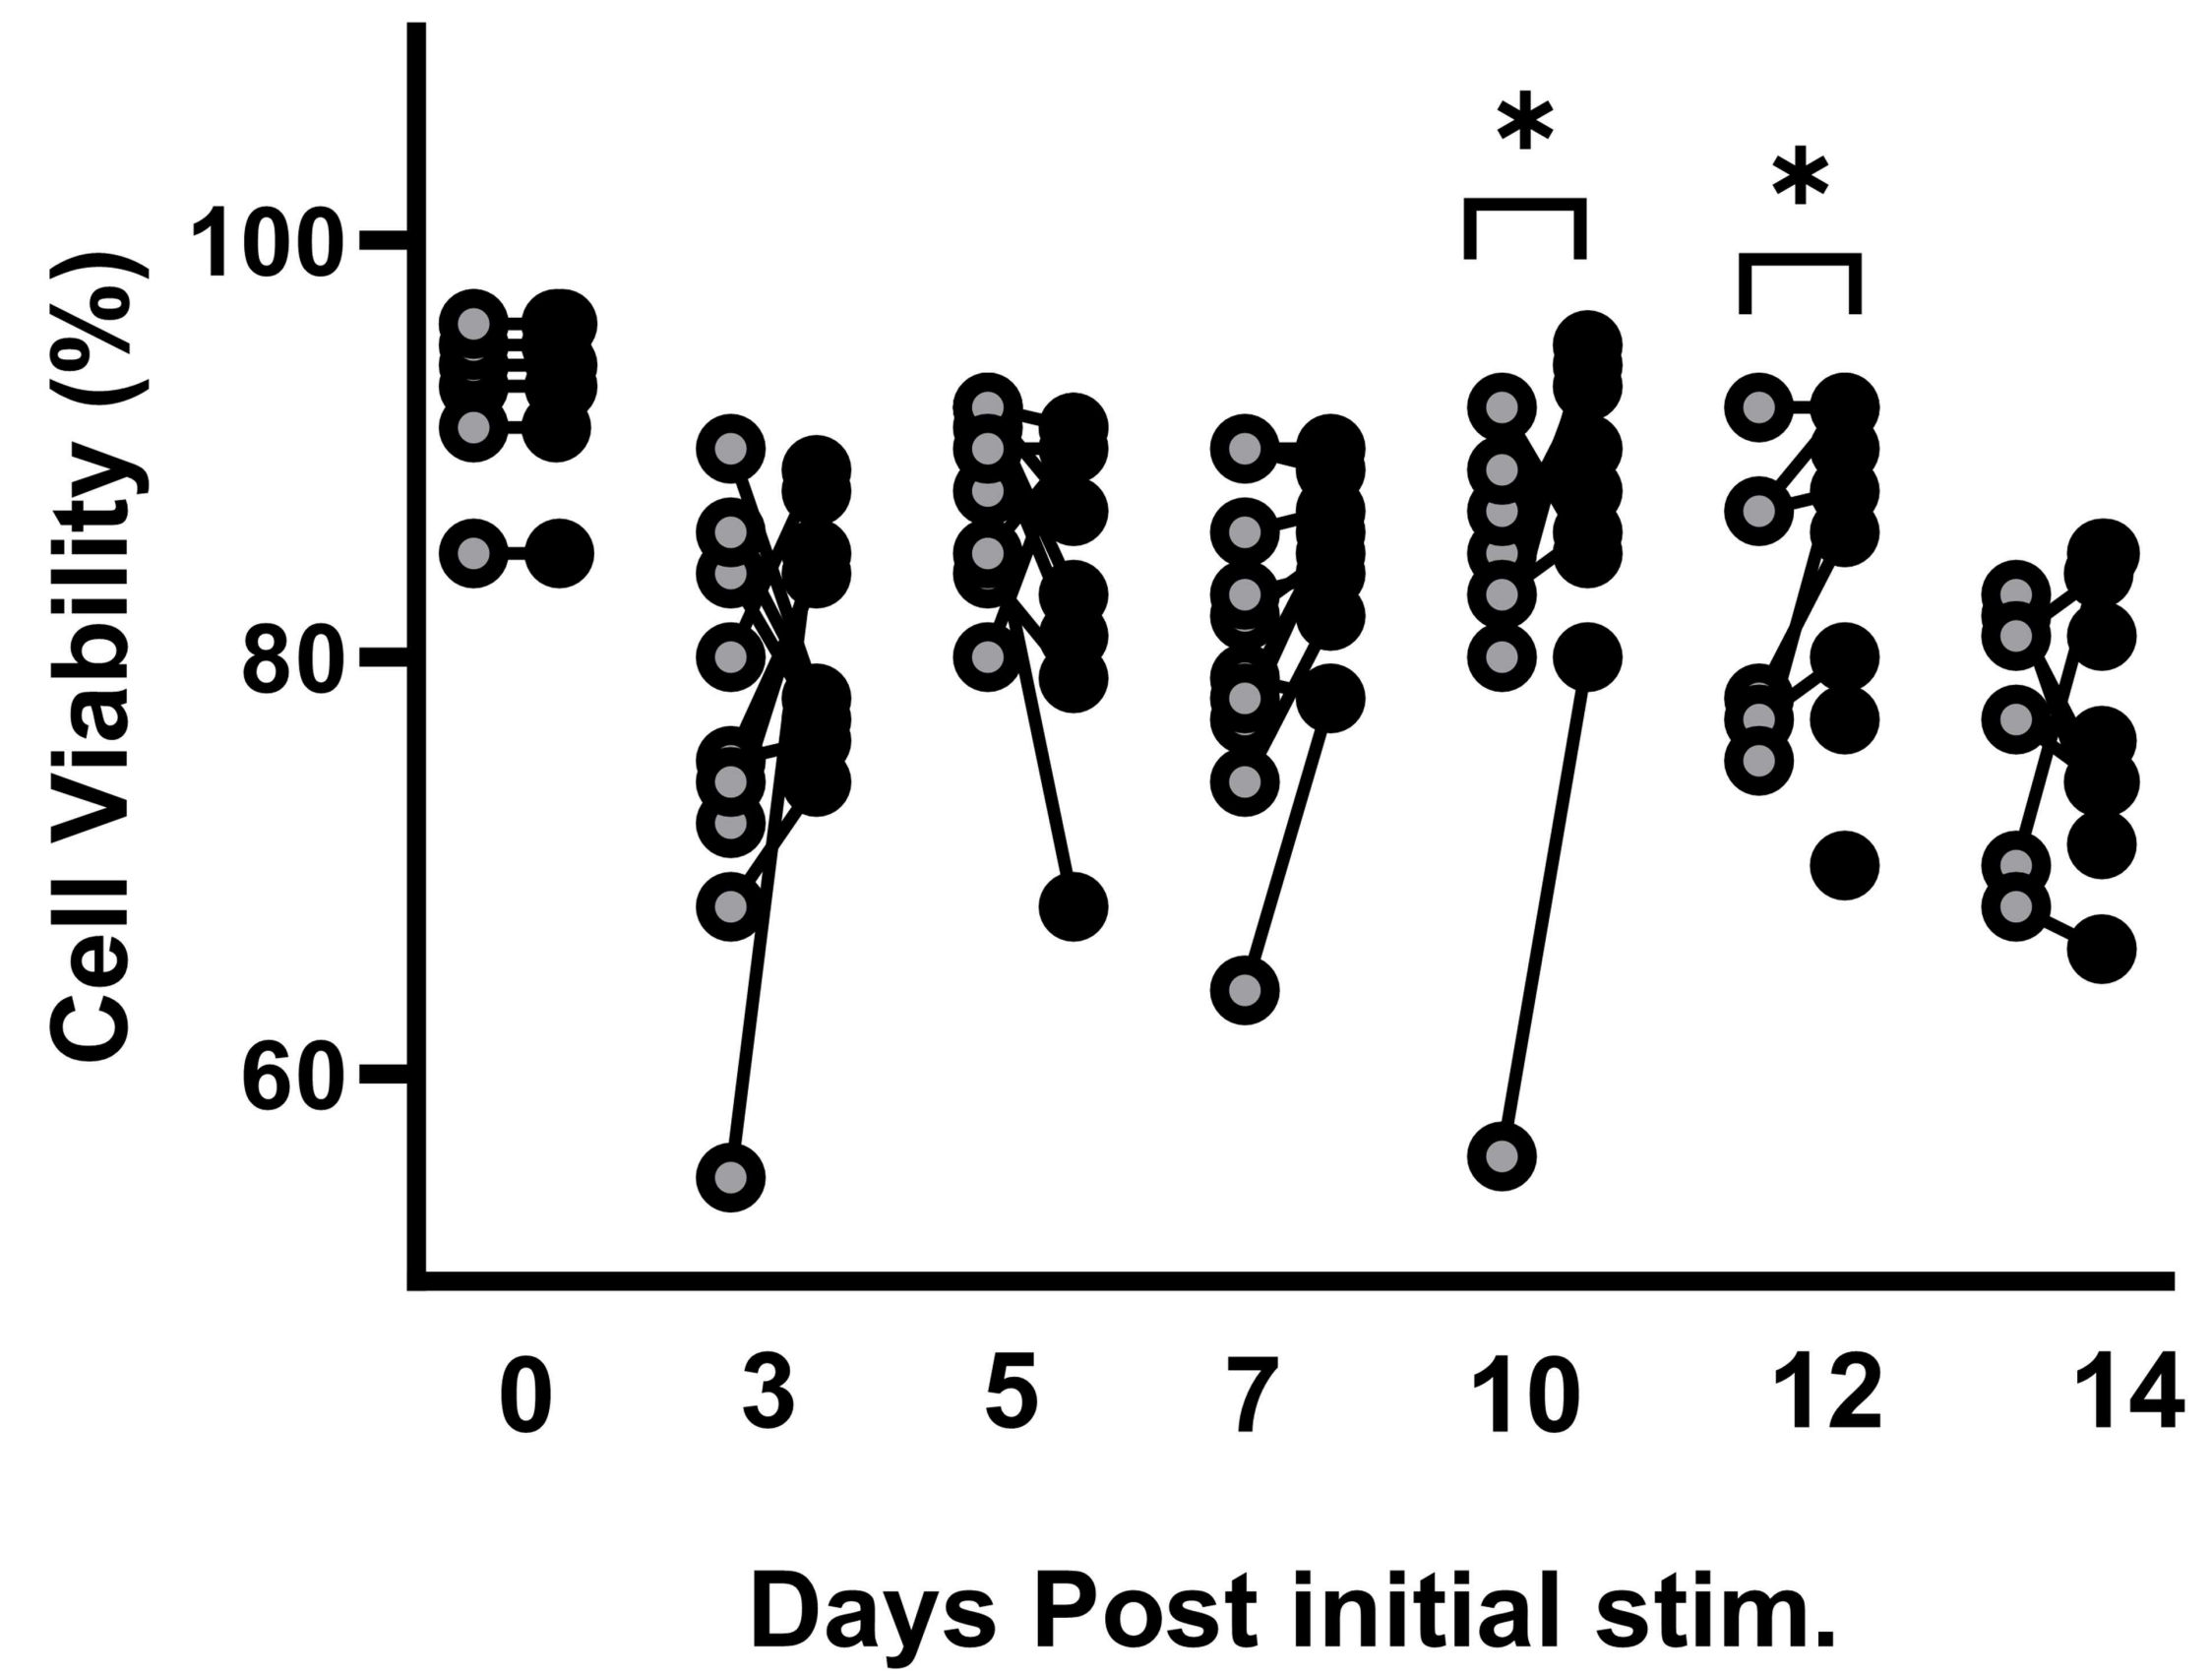

*Cont. Stim.*

**C**

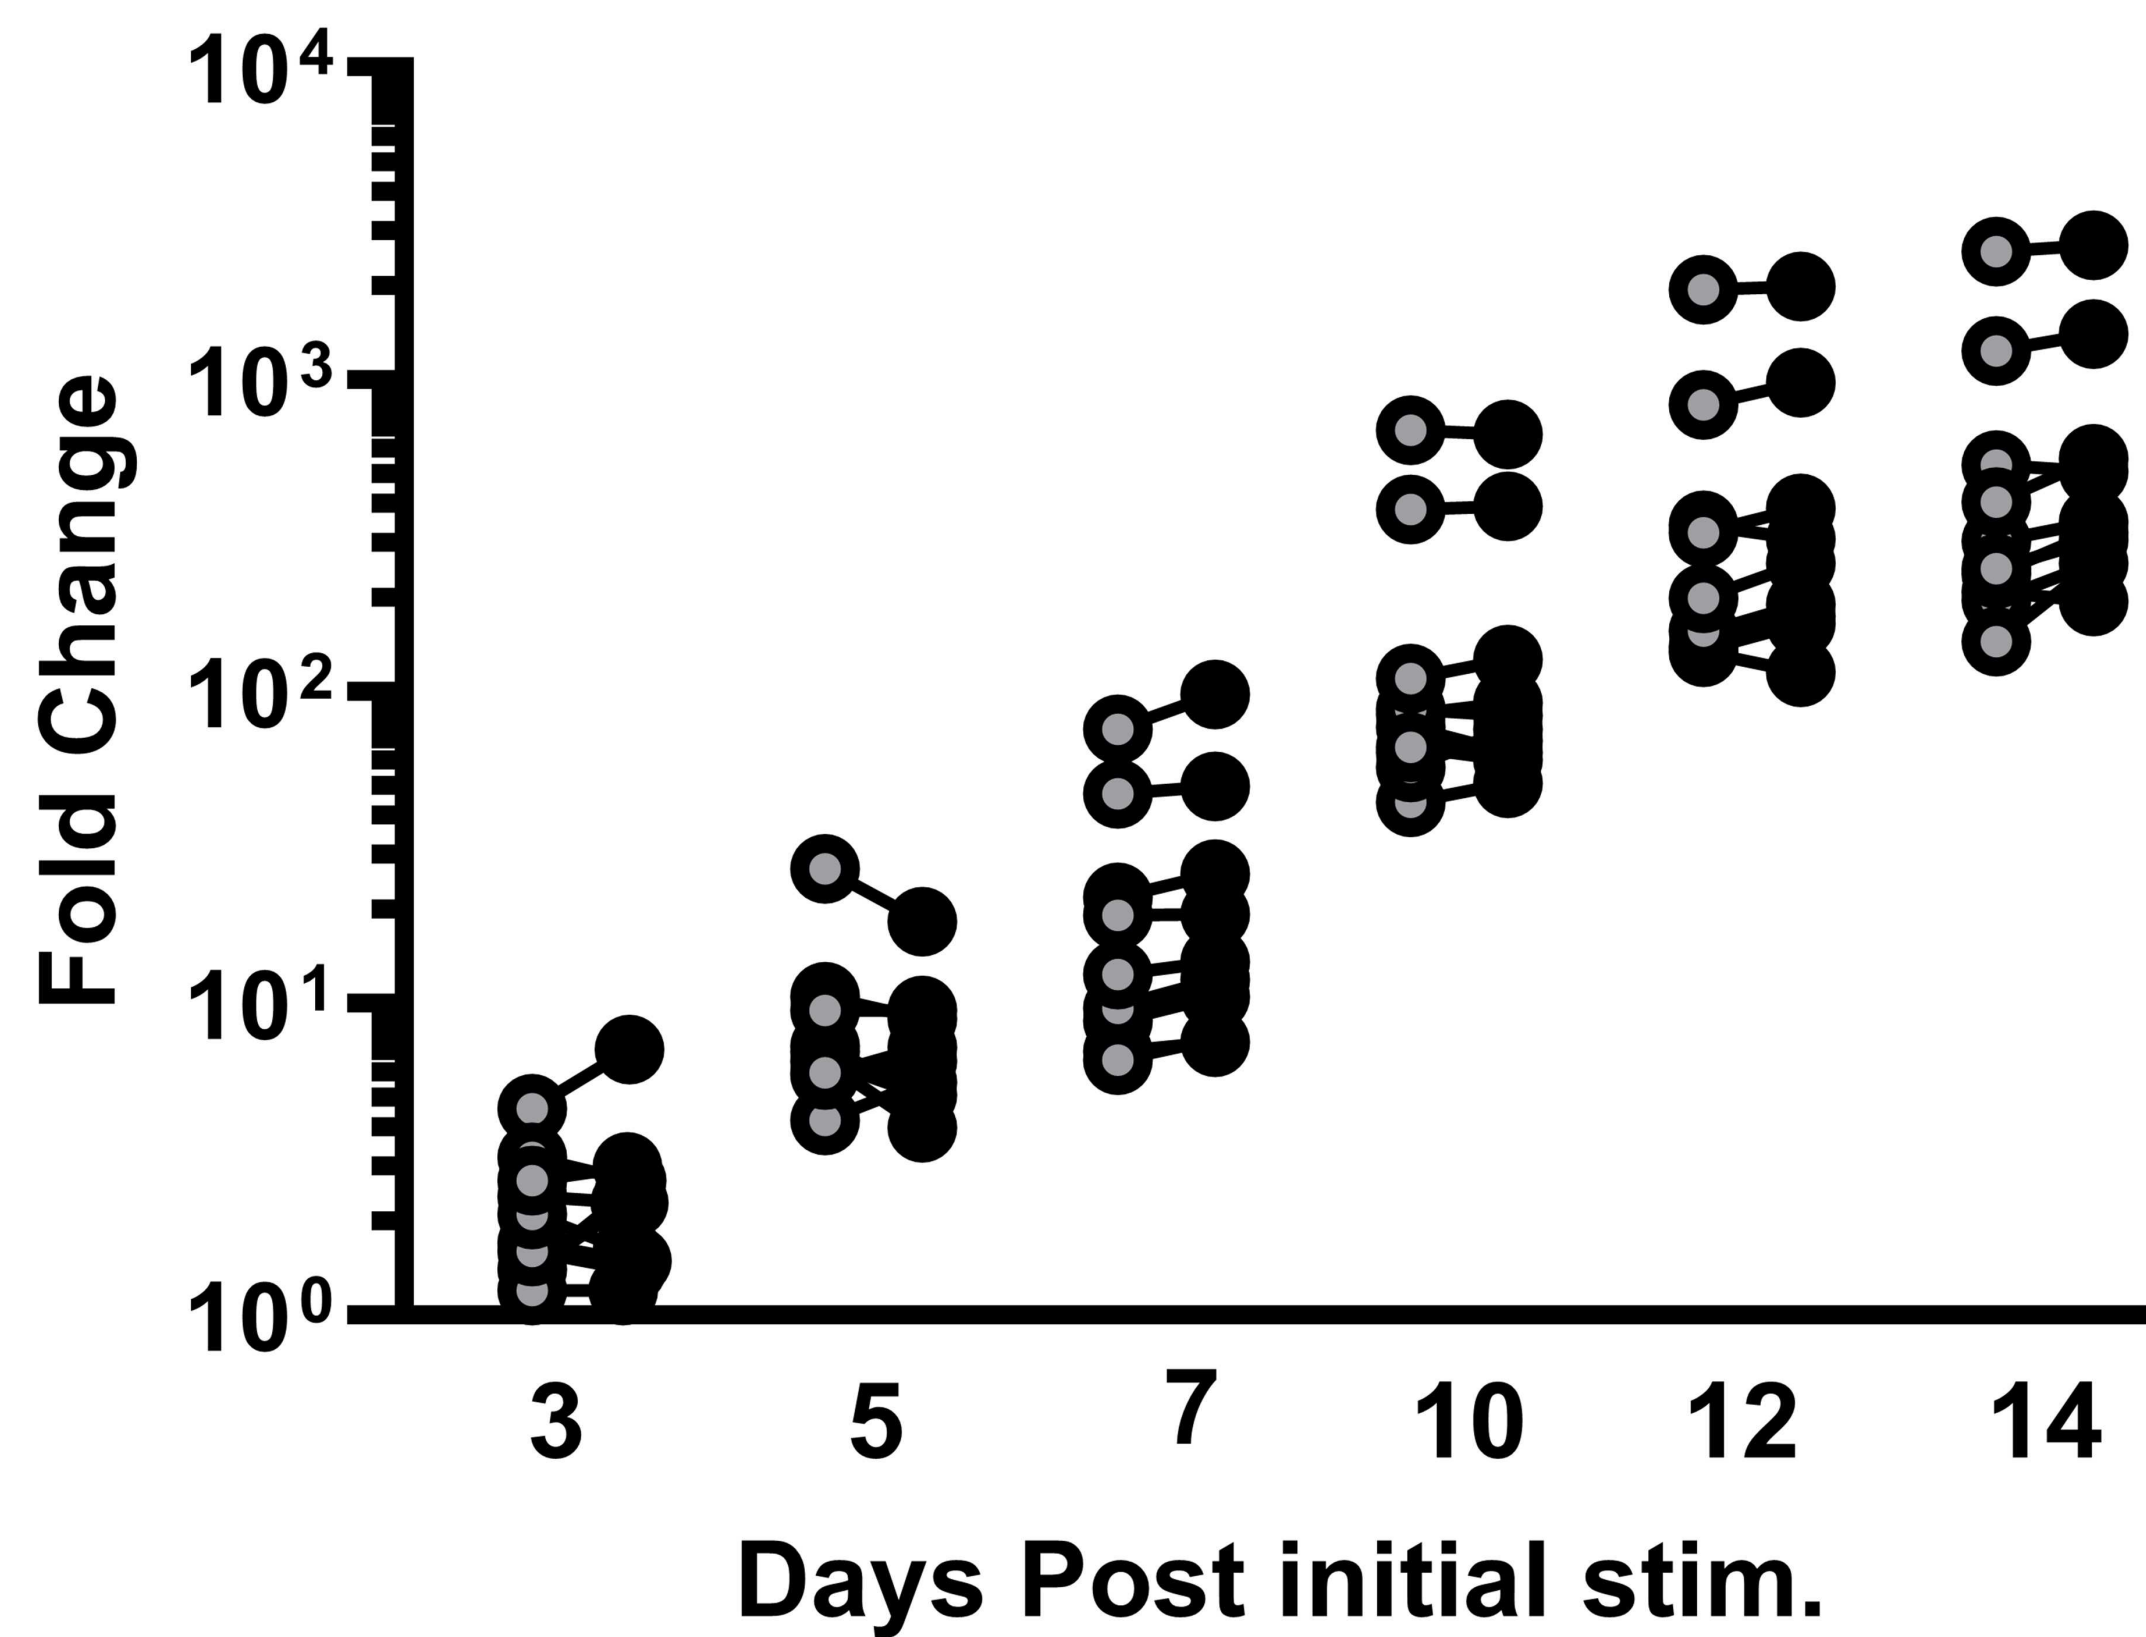

**D**

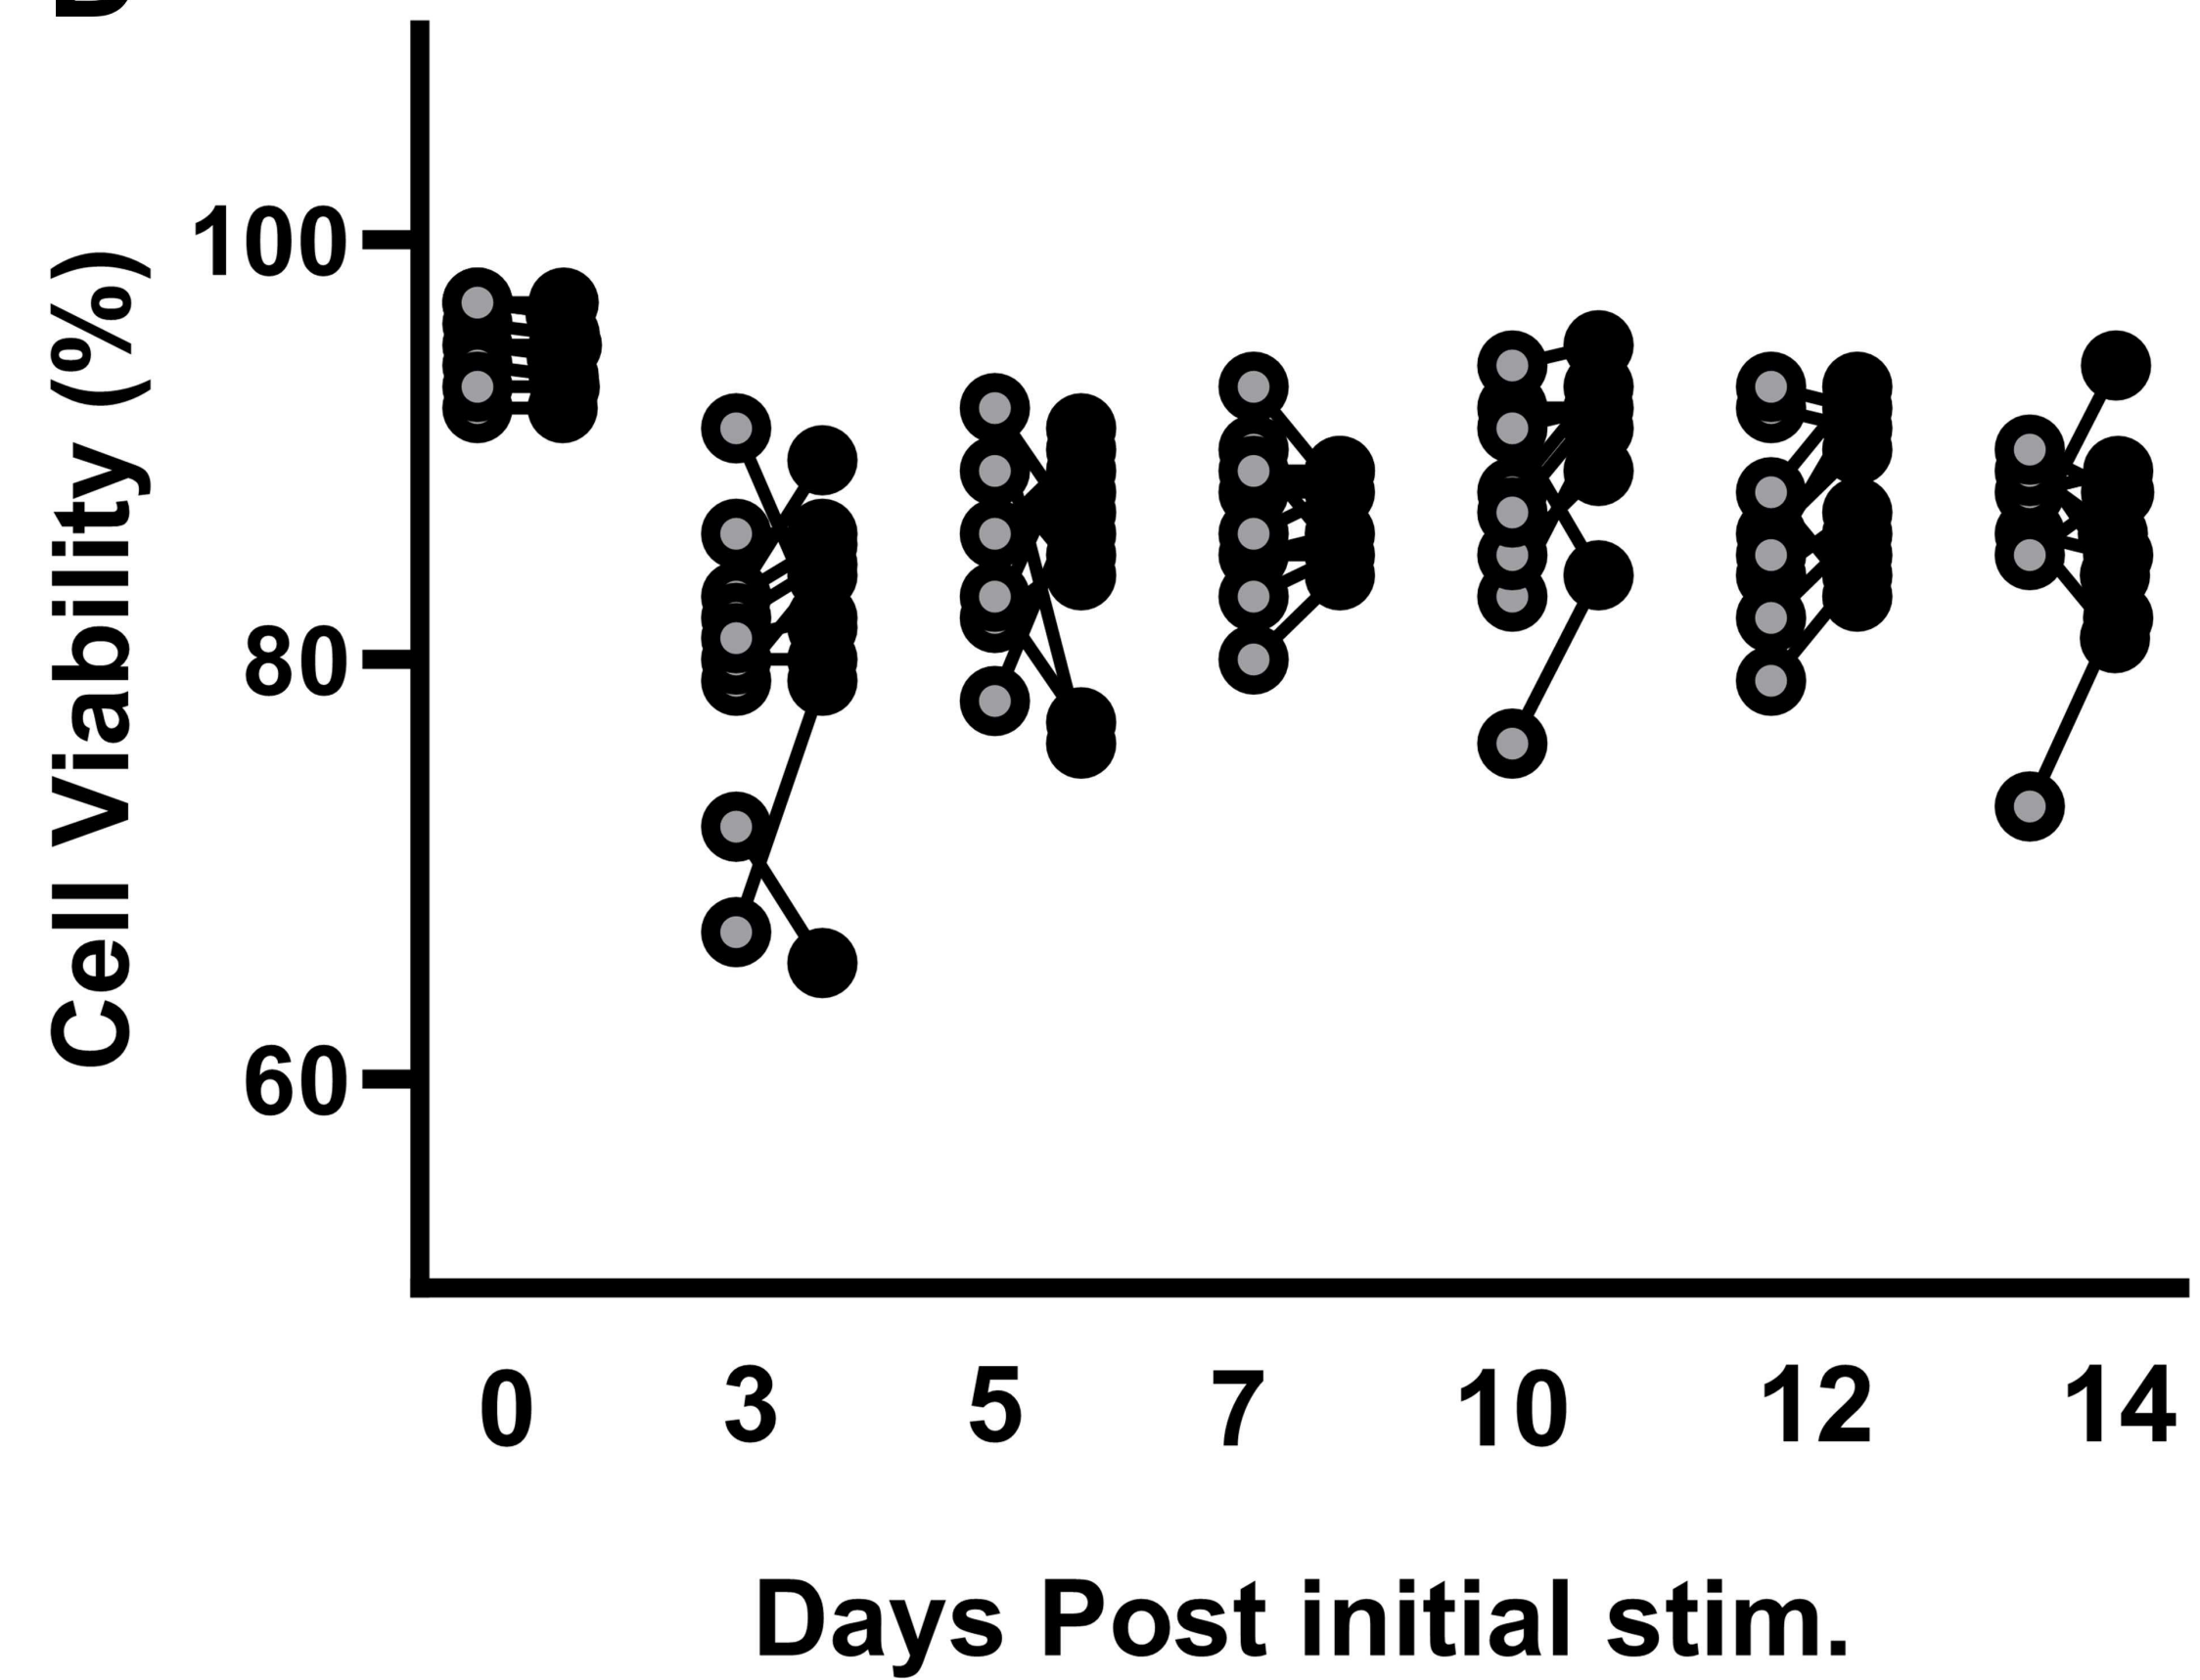

**Supp. Fig 2. Impact of mito-transfer on elderly T cell proliferation and viability.** Elderly CD4 T cells with or without mito-transfer were activated via surface cross-linking (CD3/CD28). CD4 T cells either received a single (single) or continuous (cont.) stimulation. **A)** Fold change and **B)** viability of CD4+ T cells with or without mito-transfer after single stimulation. **C)** Fold change and **D)** viability of CD4+ T cells with or without mito-transfer with continuous stimulation. 10 biological replicates per group, with  $p \leq 0.05 = *$ ,  $p \leq 0.01 = **$ , using paired Student's *t*-test.

○ Elderly CD4<sup>+</sup> T Cells (E-CD4<sup>+</sup> T Cells) ● Elderly CD4<sup>+</sup> T Cells + Mito-Transfer (EM-CD4<sup>+</sup> T Cells)

### Day 7 - Single & Continuous Stimulation

**A**

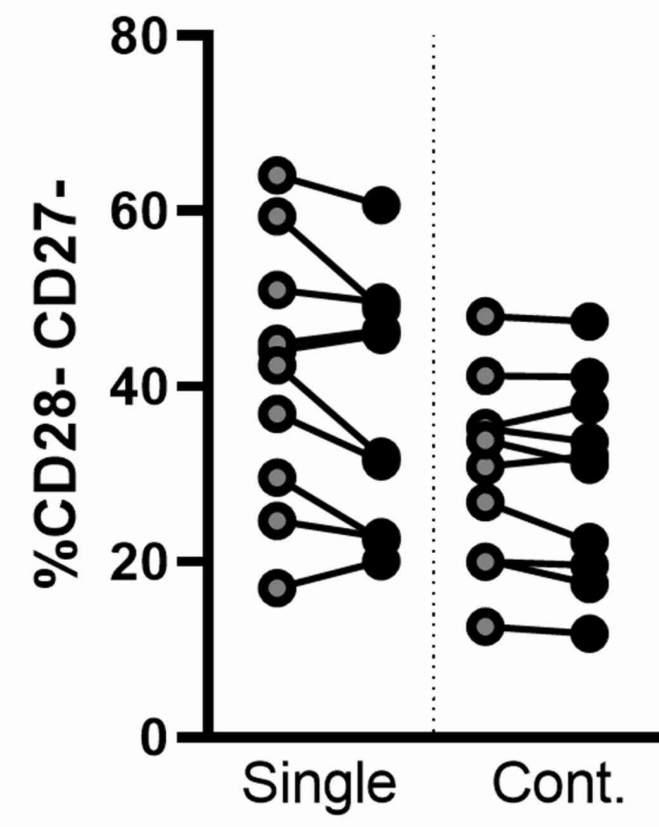

**B**

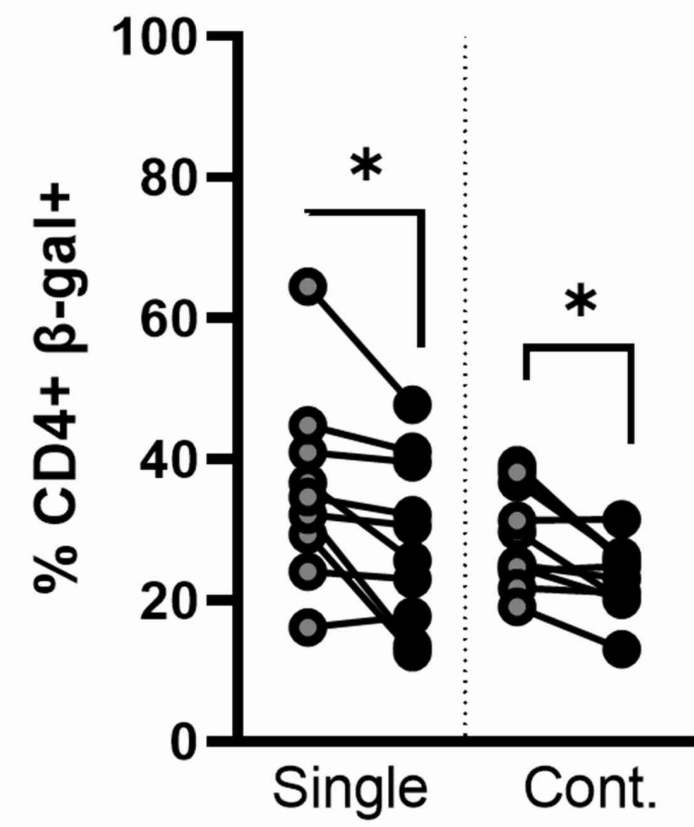

**C**

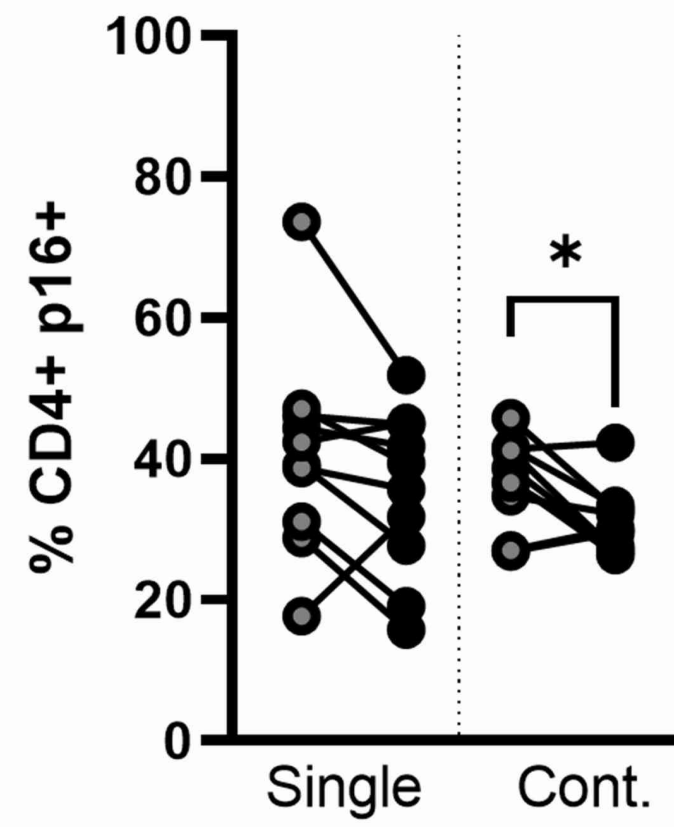

**D**

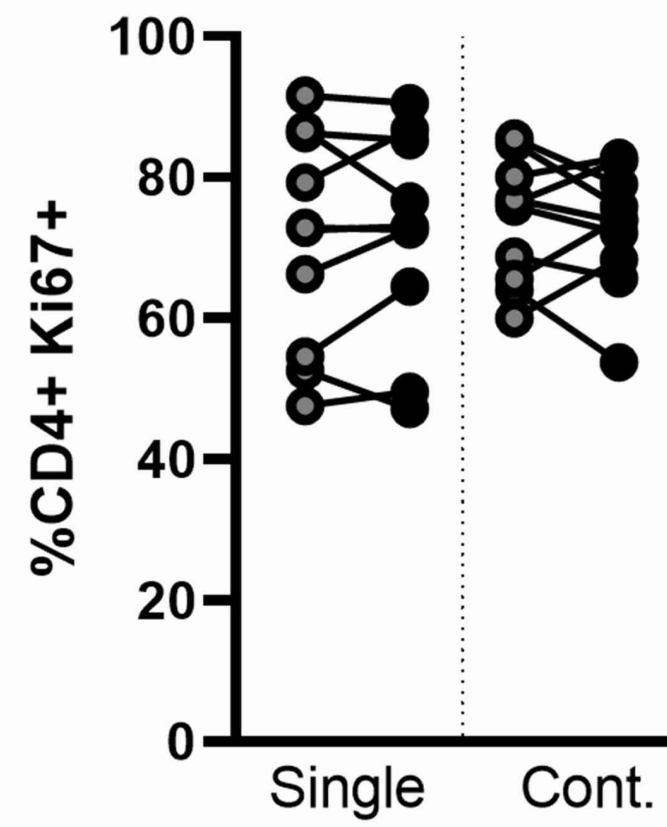

**E**

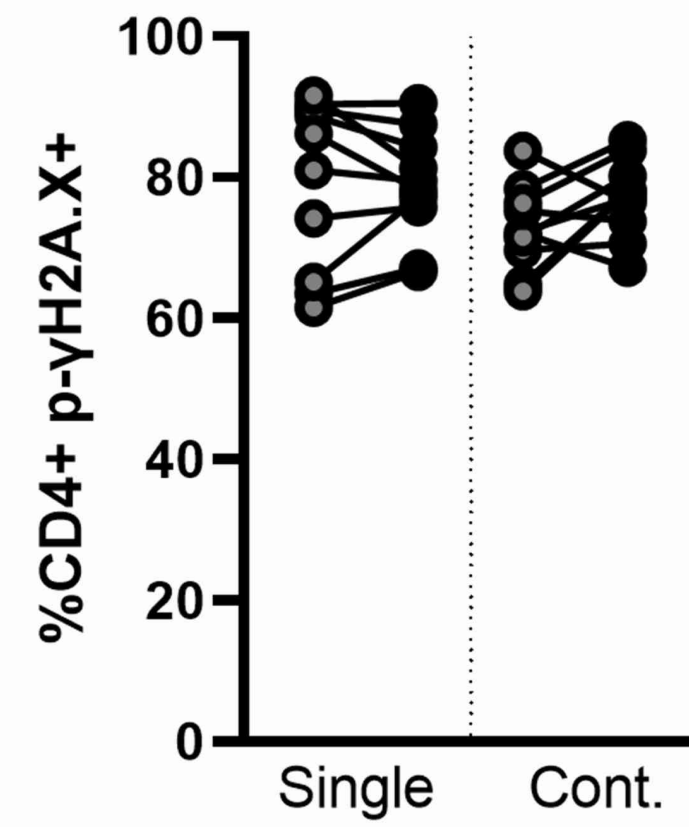

### Day 14 - Continuous Stimulation

**F**

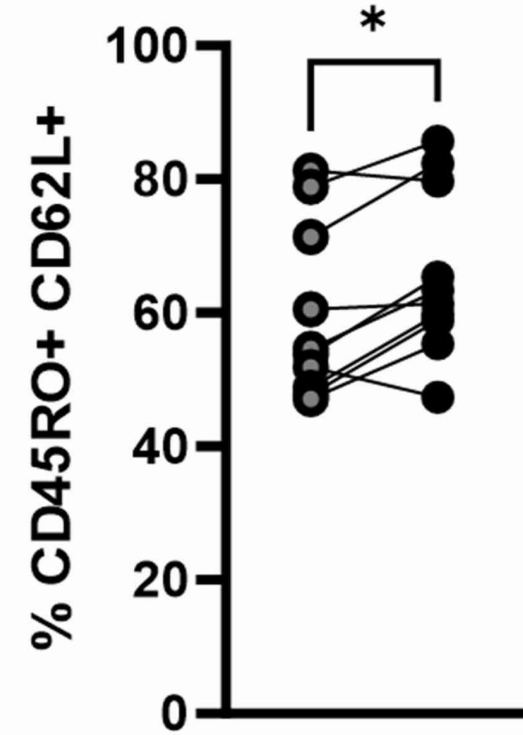

**G**

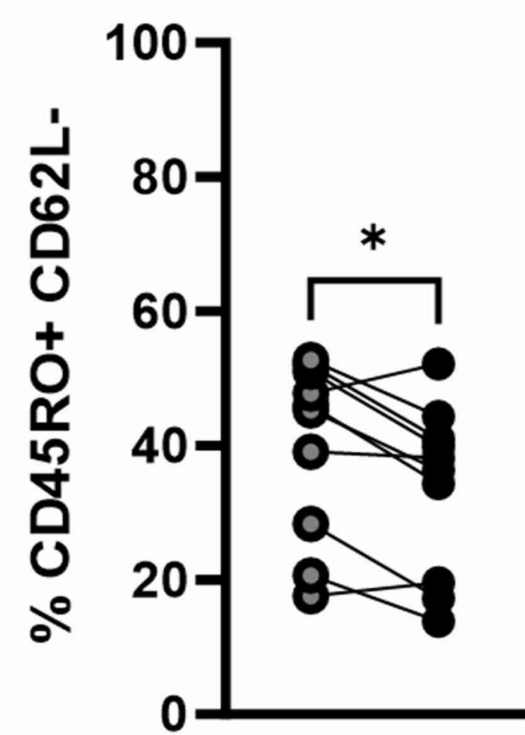

**H**

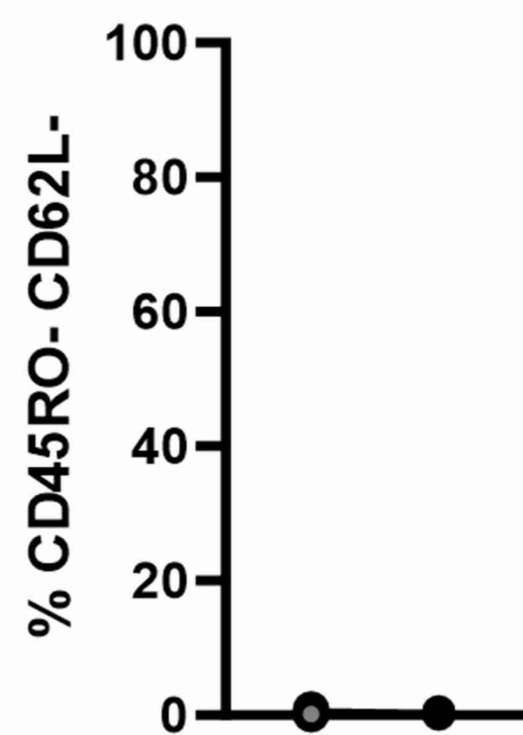

**I**

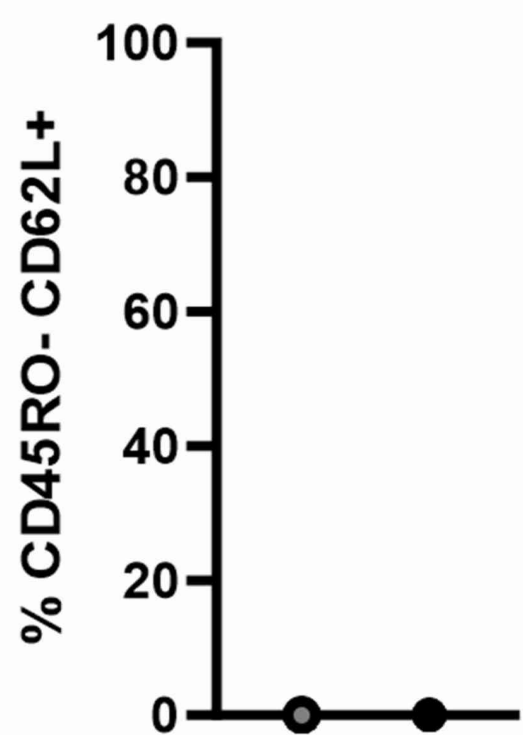

**J**

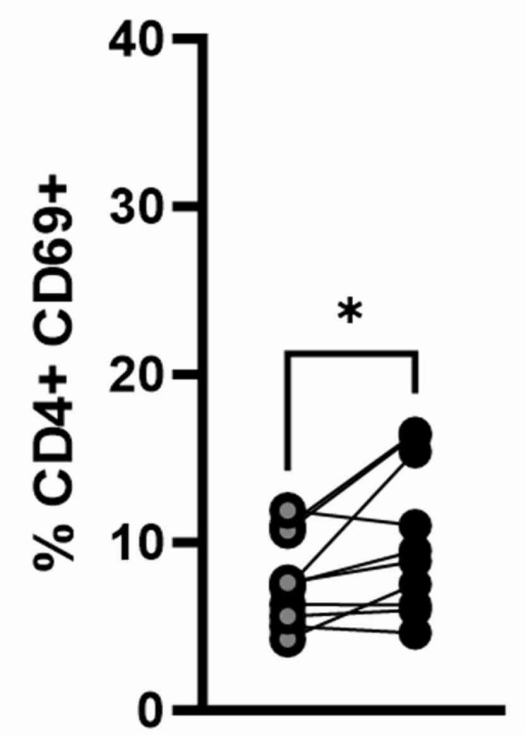

**K**

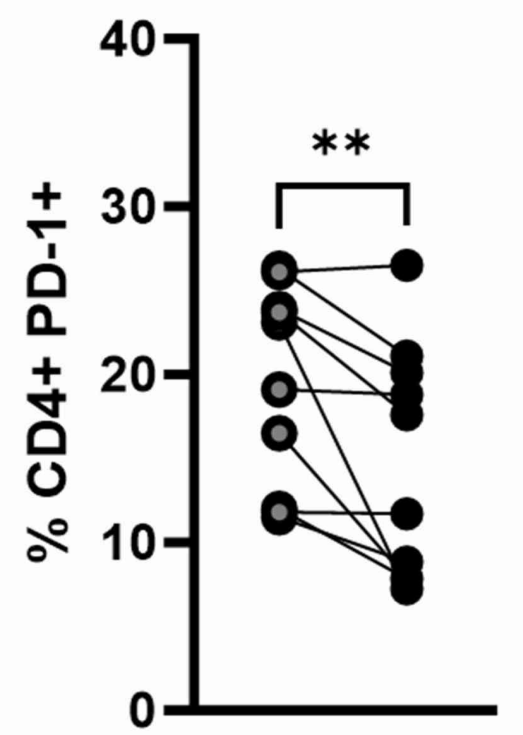

**L**

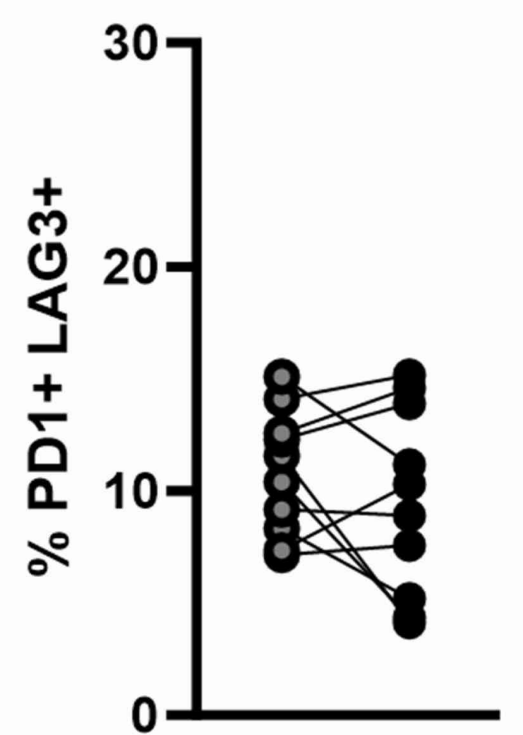

**M**

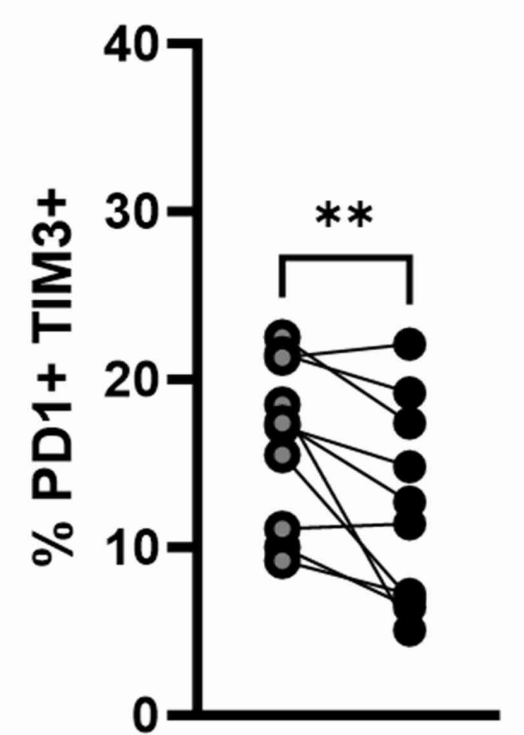

**N**

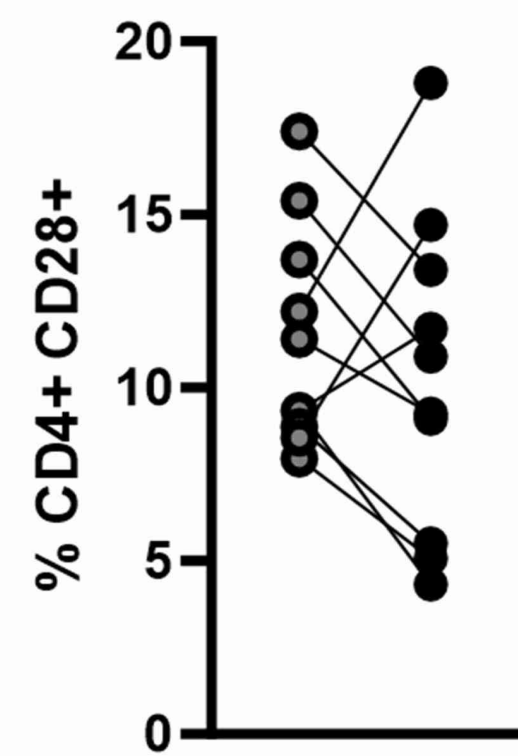

**O**

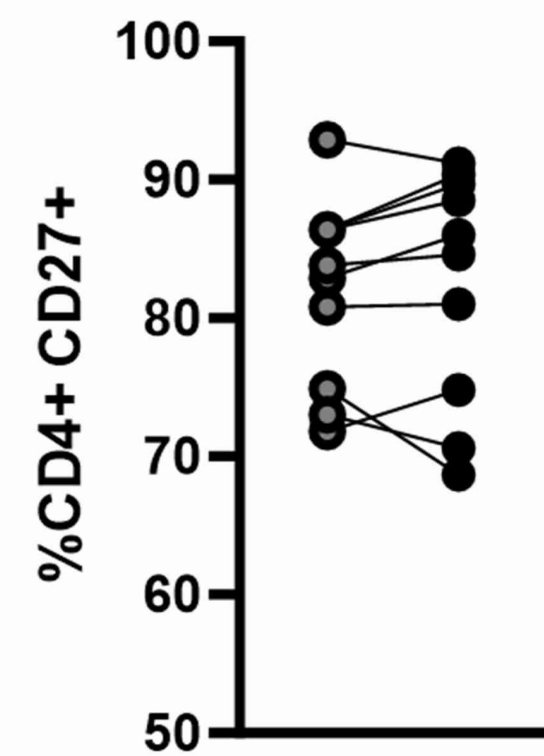

**P**

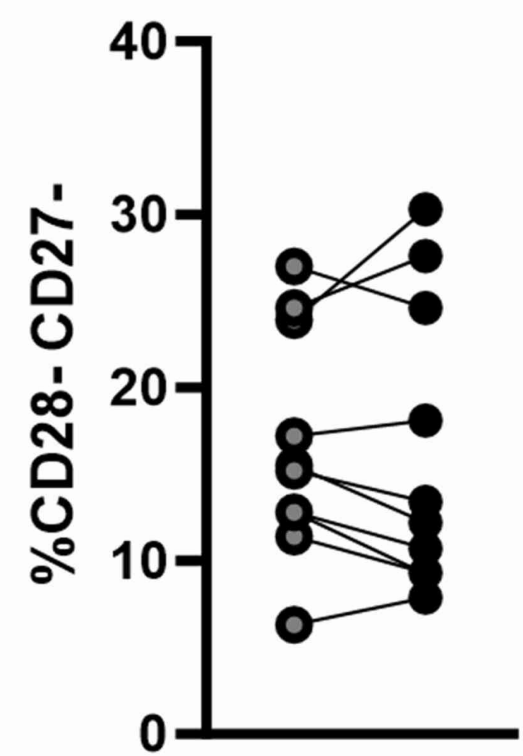

**Q**

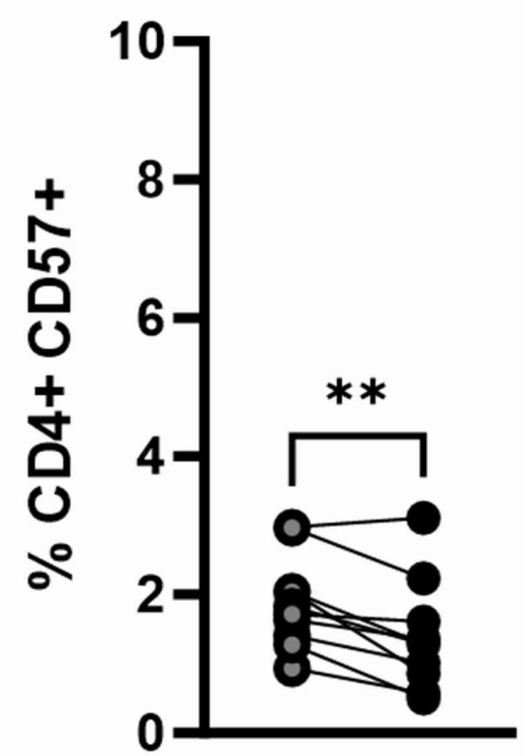

**R**

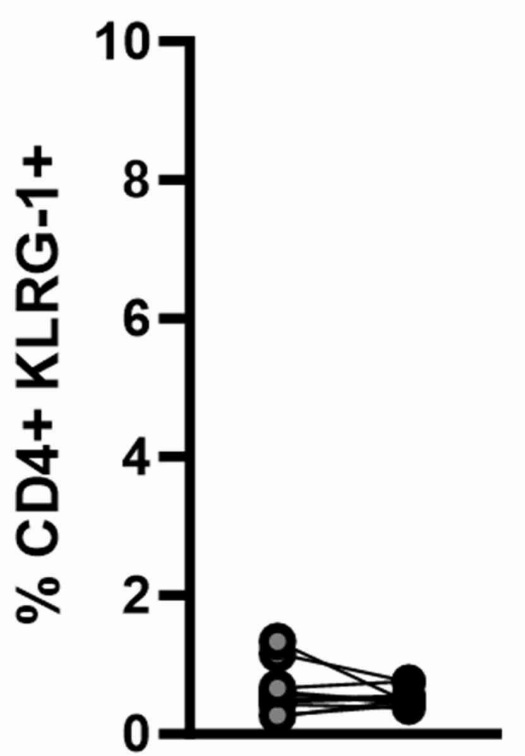

**S**

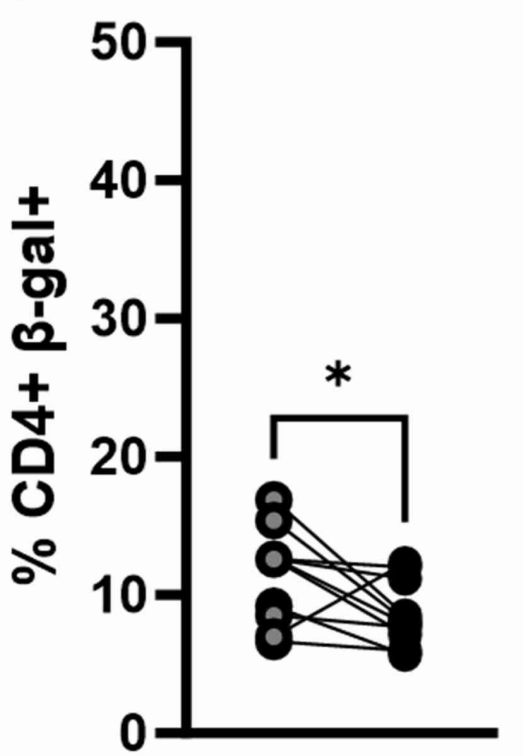

**T**

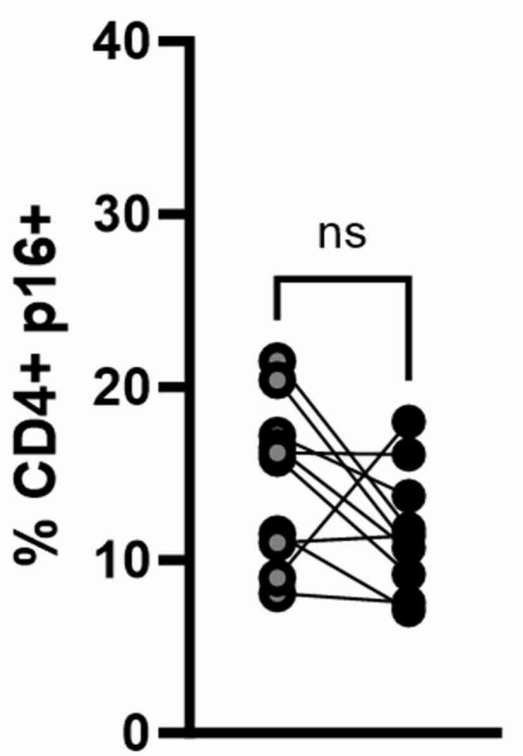

**U**

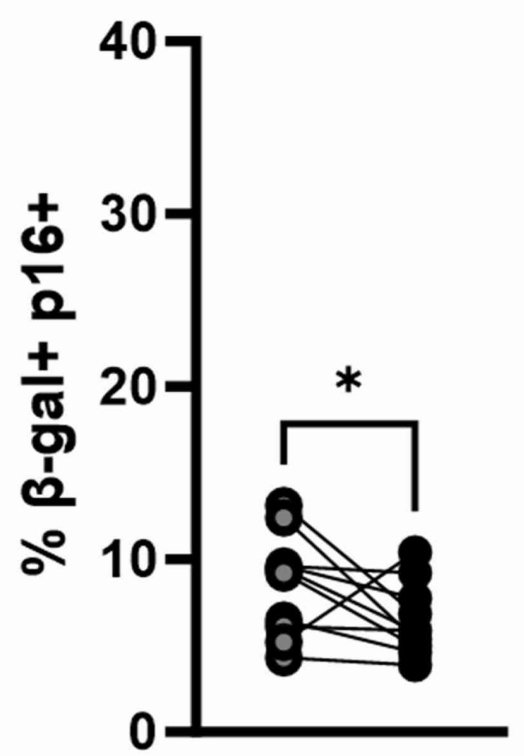

**Supp Fig 3. Mito-transfer improves T cell activation and reduces human T cell exhaustion and senescence.** Donor mitochondria isolated from primary human neonatal dermal fibroblasts were transplanted into CD4<sup>+</sup> T cells from elderly humans. Elderly CD4<sup>+</sup> T cells with or without mito-transfer were activated via surface cross-linking (CD3/CD28), T cells either received a single (single) or continuous (cont.) stimulation. The percentages of **A)** CD28- CD27, **B)**  $\beta$ -gal+, **C)** p16+, **D)** Ki67+, and **E)**  $\gamma$ H2A.X+ human CD4<sup>+</sup> cells at 7 days after initial activation with CD3/CD28/CD2. The percentages of **F)** CD45RO+ CD62L+, **G)** CD45RO+ CD62L, **H)** CD45RO- CD62L-, **I)** CD45RO- CD62L-, **J)** CD69+, **K)** PD-1+, **L)** PD-1+ LAG3+, **M)** PD-1+ TIM3+, **N)** CD28+, **O)** CD27+, **P)** CD28- CD27, **Q)** CD57+, **R)** KLRG1+, and **S)**  $\beta$ -Gal+, **T)** p16+, **U)**  $\beta$ -gal+ p16+ human CD4<sup>+</sup> T cells at 14 days after continuous stimulation with CD3/CD28/CD2. 10 biological replicates per group, with  $p \leq 0.05 = *$ ,  $p \leq 0.01 = **$ , using paired Student's t-test.

| Uniprot ID | Gene Symbol | t-test | FDR (adj. P-val.) | O1     | O2     | O3     | OM1    | OM2    | OM3    |
|------------|-------------|--------|-------------------|--------|--------|--------|--------|--------|--------|
| P35564     | Canx        | 0.000  | 0.009             | 0.244  | 0.000  | -0.086 | 1.700  | 1.720  | 1.860  |
| P56959     | Fus         | 0.739  | 1.000             | -0.231 | 0.140  | 0.000  | -0.070 | -0.107 | 0.255  |
| Q01147     | Creb1       | 0.091  | 0.232             | -0.101 | 0.000  | 0.267  | -0.384 | -0.333 | -0.078 |
| B2RQC6     | Cad         | 0.675  | 0.952             | 0.244  | 0.000  | -0.142 | 0.662  | -0.451 | -0.695 |
| O09117     | Sypl1       | 0.366  | 0.613             | 0.244  | 0.000  | -0.323 | 0.744  | -0.281 | 0.538  |
| Q9JIK9     | Mrps34      | 0.049  | 0.154             | 0.000  | 0.757  | -0.497 | 1.210  | 1.140  | 1.010  |
| Q8K1Z0     | Coq9        | 0.032  | 0.117             | 0.000  | 0.186  | -0.023 | 0.862  | 0.388  | 0.472  |
| P12265     | Gusb        | 0.016  | 0.079             | 0.311  | 0.000  | -0.297 | 0.822  | 0.616  | 0.837  |
| P0C0S6     | H2afz       | 0.384  | 0.633             | -0.205 | 0.000  | 0.096  | -0.364 | -0.361 | 0.097  |
| Q3THW5     | H2afv       | 0.384  | 0.633             | -0.205 | 0.000  | 0.096  | -0.364 | -0.361 | 0.097  |
| Q8BM55     | Tmem214     | 0.001  | 0.020             | 0.000  | 0.450  | -0.101 | 1.560  | 1.490  | 1.600  |
| P70227     | Itpr3       | 0.573  | 0.843             | -0.451 | 0.154  | 0.000  | 0.017  | -0.052 | 0.078  |
| O08579     | Emd         | 0.292  | 0.518             | -0.552 | 0.000  | 0.097  | 0.094  | -0.100 | 0.655  |
| Q9CQ60     | Pgls        | 0.384  | 0.633             | 0.000  | 1.190  | -0.787 | -0.304 | -2.870 | 0.284  |
| Q8K2K6     | Agfg1       | 0.896  | 1.000             | -0.030 | 0.000  | 1.700  | 0.753  | 0.090  | 1.090  |
| P97450     | Atp5j       | 0.033  | 0.121             | 0.000  | 0.125  | -0.630 | 1.010  | 0.420  | 1.140  |
| O55022     | Pgrmc1      | 0.000  | 0.010             | 0.000  | -0.086 | 0.009  | 1.480  | 1.240  | 1.540  |
| Q9D0K2     | Oxct1       | 0.000  | 0.012             | 0.000  | 0.092  | -0.243 | 1.760  | 1.440  | 1.670  |
| Q3UZ39     | Lrrfip1     | 0.003  | 0.030             | 0.000  | -0.058 | 0.148  | -0.914 | -0.930 | -0.588 |
| P52825     | Cpt2        | 0.312  | 0.545             | 0.000  | 0.208  | -0.370 | 1.210  | 0.043  | 0.051  |
| P70460     | Vasp        | 0.139  | 0.305             | 0.006  | -0.256 | 0.000  | -0.109 | -0.539 | -0.494 |
| Q62422     | Ostf1       | 0.025  | 0.102             | 0.488  | -0.040 | 0.000  | -0.345 | -0.835 | -0.846 |
| Q8BMK4     | Ckap4       | 0.000  | 0.010             | 0.093  | 0.000  | -0.598 | 3.600  | 3.310  | 3.710  |
| Q8BFY9     | Tnpo1       | 0.030  | 0.112             | -0.077 | 0.000  | 0.000  | -0.433 | -1.300 | -0.849 |
| Q9D6J6     | Ndufv2      | 0.049  | 0.154             | 0.000  | 0.342  | -0.183 | 0.718  | 0.363  | 0.856  |
| P51125     | Cast        | 0.847  | 1.000             | -0.076 | 0.000  | 0.118  | 0.232  | -0.209 | -0.068 |
| P06800     | Ptprc       | 0.199  | 0.394             | -0.090 | 0.130  | 0.000  | -0.302 | -0.348 | 0.046  |
| Q9Z277     | Baz1b       | 0.955  | 1.000             | -0.231 | 0.238  | 0.000  | 0.030  | -0.197 | 0.206  |
| Q9CWL8     | Ctnnb1      | 0.003  | 0.033             | 0.000  | 0.296  | -0.044 | -0.669 | -1.050 | -0.968 |
| Q7TPR4     | Actn1       | 0.680  | 0.956             | 0.455  | 0.000  | -0.439 | 0.662  | -0.251 | 0.099  |
| P35979     | Rpl12       | 0.491  | 0.755             | 0.266  | -0.151 | 0.000  | 0.271  | -0.094 | 0.359  |
| O09167     | Rpl21       | 0.336  | 0.573             | 0.282  | -1.900 | 0.000  | 0.415  | -0.668 | 2.110  |
| Q8R081     | Hnrnp1      | 0.025  | 0.101             | -0.126 | 0.000  | 0.040  | -0.348 | -0.636 | -0.308 |
| P70315     | Was         | 0.034  | 0.122             | 0.000  | -0.169 | 0.494  | -0.488 | -1.180 | -0.715 |
| Q91YH5     | Ati3        | 0.038  | 0.130             | -0.218 | 0.589  | 0.000  | 0.827  | 0.935  | 0.843  |
| P14824     | Anxa6       | 0.623  | 0.898             | -0.261 | 0.274  | 0.000  | -0.273 | -0.143 | 0.121  |
| Q99L45     | Eif2s2      | 0.540  | 0.807             | 0.342  | -0.259 | 0.000  | 0.266  | -0.631 | -0.179 |
| Q9Z2D6     | Mecp2       | 0.063  | 0.181             | -0.130 | 0.000  | 0.020  | -0.393 | -0.654 | -0.177 |
| Q9D1A2     | Cndp2       | 0.006  | 0.043             | 0.000  | 0.087  | -0.305 | -0.761 | -1.170 | -1.080 |
| Q6IRU2     | Tpm4        | 0.699  | 0.975             | 0.000  | 0.258  | -0.242 | 0.139  | -0.352 | -0.025 |
| Q9JKF1     | Iqgap1      | 0.611  | 0.885             | 0.080  | 0.000  | -0.164 | 0.186  | -0.420 | -0.164 |
| O08734     | Bak1        | 0.010  | 0.060             | 0.000  | 0.028  | -0.547 | 0.687  | 0.764  | 0.655  |
| Q9DBJ1     | Pgam1       | 0.020  | 0.088             | 0.582  | -0.030 | 0.000  | -0.473 | -1.080 | -1.040 |
| P24270     | Cat         | 0.046  | 0.148             | 0.177  | 0.000  | -0.253 | 1.040  | 0.403  | 0.494  |
| P47757     | Capzb       | 0.016  | 0.077             | 0.000  | 0.178  | -0.196 | -0.410 | -0.725 | -0.604 |
| Q8BK67     | Rcc2        | 0.253  | 0.466             | 0.487  | -0.092 | 0.000  | 0.079  | -0.473 | -0.172 |
| Q8C0G2     | Traf3ip3    | 0.025  | 0.100             | -0.492 | 0.050  | 0.000  | -0.704 | -0.767 | -0.938 |
| Q9CYN2     | Spcs2       | 0.069  | 0.192             | 0.000  | 0.270  | -0.026 | 0.525  | 0.226  | 0.467  |
| Q9D0F9     | Pgm1        | 0.000  | 0.014             | -0.069 | 0.000  | 0.150  | -1.850 | -2.270 | -1.690 |
| Q5SUA5     | Myo1g       | 0.101  | 0.247             | 0.000  | -0.027 | 0.074  | -0.171 | -0.701 | -0.196 |
| Q8BJZ4     | Mrps35      | 0.007  | 0.051             | 0.062  | 0.000  | -0.636 | 1.340  | 1.050  | 0.901  |
| Q920B9     | Supt16h     | 0.019  | 0.087             | 0.022  | 0.000  | -0.102 | -0.331 | -0.845 | -0.661 |
| D3Z7P3     | Gls         | 0.500  | 0.765             | 0.000  | 0.006  | -0.037 | 0.732  | -0.191 | 0.043  |
| Q8BRG8     | Tmem209     | 0.181  | 0.368             | 0.000  | -1.610 | 0.980  | 0.868  | 1.100  | 1.090  |
| Q9DBE8     | Alg2        | 0.000  | 0.012             | 0.004  | 0.000  | -0.115 | 0.889  | 0.810  | 1.040  |
| Q9JIX8     | Acin1       | 0.008  | 0.051             | -0.012 | 0.228  | 0.000  | -0.410 | -0.622 | -0.382 |
| Q9JI39     | Abcb10      | 0.138  | 0.303             | 0.860  | -0.266 | 0.000  | 1.480  | 0.456  | 1.190  |



|        |          |       |       |        |        |        |        |        |        |
|--------|----------|-------|-------|--------|--------|--------|--------|--------|--------|
| O55201 | Supt5h   | 0.014 | 0.073 | 0.000  | -0.043 | 0.190  | -0.500 | -1.070 | -0.621 |
| P47754 | Capza2   | 0.597 | 0.870 | 0.242  | -0.135 | 0.000  | -0.200 | -0.355 | 0.281  |
| Q9R190 | Mta2     | 0.043 | 0.142 | -0.073 | 0.000  | 0.242  | -0.313 | -0.546 | -0.196 |
| Q99PL5 | Rrbp1    | 0.476 | 0.736 | 0.000  | 0.054  | -0.281 | 0.493  | -0.283 | 0.146  |
| Q6DFW4 | Nop58    | 0.101 | 0.246 | 0.101  | -0.080 | 0.000  | -0.065 | -0.661 | -0.403 |
| P26041 | Msn      | 0.350 | 0.592 | 0.047  | 0.000  | -0.054 | 0.016  | -0.303 | -0.044 |
| Q9DCT5 | Sdf2     | 0.001 | 0.020 | -0.108 | 0.000  | 0.394  | 2.260  | 1.720  | 1.880  |
| Q9CQJ8 | Ndufb9   | 0.003 | 0.033 | -0.196 | 0.220  | 0.000  | 0.740  | 0.744  | 0.811  |
| P97742 | Cpt1a    | 0.015 | 0.076 | 0.000  | 0.296  | -0.452 | 0.925  | 0.756  | 0.903  |
| Q9JKR6 | Hyou1    | 0.008 | 0.053 | 0.225  | 0.000  | -0.131 | 1.020  | 0.600  | 0.825  |
| P13020 | Gsn      | 0.025 | 0.102 | 0.242  | 0.000  | -0.363 | 0.994  | 0.554  | 0.643  |
| P11087 | Col1a1   | 0.000 | 0.002 | 0.000  | 0.029  | -0.359 | 7.740  | 7.340  | 7.640  |
| P62264 | Rps14    | 0.453 | 0.711 | 0.151  | -0.252 | 0.000  | 0.120  | -0.562 | -0.229 |
| P70441 | Slc9a3r1 | 0.003 | 0.033 | 0.000  | -0.076 | 0.282  | -1.040 | -1.680 | -1.200 |
| Q9D4J7 | Phf6     | 0.051 | 0.158 | 0.066  | -0.328 | 0.000  | -0.462 | -1.120 | -0.611 |
| P47738 | Aldh2    | 0.815 | 1.000 | 0.398  | 0.000  | -0.923 | 0.773  | -0.269 | -0.602 |
| Q00PI9 | Hnrnpul2 | 0.026 | 0.104 | -0.040 | 0.228  | 0.000  | -0.233 | -0.569 | -0.346 |
| Q8VE37 | Rcc1     | 0.021 | 0.092 | -0.073 | 0.000  | 0.088  | -0.349 | -0.451 | -0.184 |
| Q62351 | Tfrc     | 0.848 | 1.000 | 1.330  | 0.000  | -0.491 | 1.130  | -0.397 | -0.350 |
| Q9Z2I8 | Suc1g2   | 0.566 | 0.835 | 0.026  | 0.000  | -0.159 | 0.510  | -0.235 | 0.016  |
| Q6P5E4 | Ugg1     | 0.004 | 0.038 | 0.000  | 0.111  | -0.056 | 0.592  | 0.431  | 0.718  |
| P22892 | Ap1g1    | 0.026 | 0.103 | 0.208  | -0.088 | 0.000  | -0.441 | -1.260 | -1.380 |
| P68404 | Prkcb    | 0.078 | 0.209 | 0.000  | 0.147  | -0.418 | -0.334 | -0.753 | -0.690 |
| Q9D554 | Sf3a3    | 0.380 | 0.629 | -0.549 | 0.464  | 0.000  | -1.380 | -0.697 | 0.305  |
| Q9DCX2 | Atp5h    | 0.025 | 0.101 | 0.000  | 0.466  | -0.336 | 1.070  | 1.120  | 0.719  |
| P20152 | Vim      | 0.215 | 0.412 | -0.323 | 0.000  | 0.034  | 0.296  | -0.083 | 0.213  |
| Q3THK7 | Gmps     | 0.013 | 0.069 | 0.144  | 0.000  | -0.093 | -0.611 | -1.310 | -0.837 |
| P35550 | Fbl      | 0.028 | 0.108 | 0.000  | 0.208  | -0.044 | -0.216 | -0.596 | -0.384 |
| Q8VE22 | Mrps23   | 0.006 | 0.044 | -0.054 | 0.132  | 0.000  | 0.889  | 0.501  | 0.810  |
| P60229 | Eif3e    | 0.509 | 0.773 | 0.118  | 0.000  | -0.169 | 0.147  | -0.427 | -0.174 |
| Q569Z6 | Thrap3   | 0.018 | 0.083 | 0.000  | -0.095 | 0.105  | -0.329 | -0.780 | -0.538 |
| P50396 | Gdi1     | 0.000 | 0.008 | -0.087 | 0.000  | 0.016  | -1.240 | -1.480 | -1.310 |
| Q9DAR7 | Dcps     | 0.002 | 0.027 | 0.000  | -0.191 | 0.360  | -1.520 | -1.940 | -2.320 |
| Q02053 | Uba1     | 0.001 | 0.019 | -0.136 | 0.000  | 0.019  | -0.926 | -1.240 | -1.310 |
| Q99L43 | Cds2     | 0.069 | 0.191 | 0.096  | 0.000  | -0.041 | 0.400  | 0.094  | 0.473  |
| P68373 | Tuba1c   | 0.757 | 1.000 | -0.157 | 0.382  | 0.000  | 0.181  | -0.134 | -0.005 |
| Q8R550 | Sh3kbp1  | 0.065 | 0.185 | -0.456 | 0.012  | 0.000  | -0.738 | -0.809 | -0.400 |
| Q64511 | Top2b    | 0.552 | 0.820 | -0.077 | 0.020  | 0.000  | -0.131 | -0.265 | 0.115  |
| Q62418 | Dbnl     | 0.002 | 0.028 | -0.131 | 0.000  | 0.056  | -1.040 | -1.690 | -1.410 |
| Q9D404 | Oxsm     | 0.917 | 1.000 | 0.000  | 0.611  | -0.220 | 0.234  | 0.026  | 0.046  |
| Q8BPU7 | Elmo1    | 0.003 | 0.033 | -0.217 | 0.000  | 0.110  | -0.699 | -0.889 | -0.683 |
| Q99JB2 | Stoml2   | 0.007 | 0.048 | 0.000  | 0.206  | -0.196 | 0.991  | 0.626  | 0.828  |
| P11499 | Hsp90ab1 | 0.018 | 0.084 | 0.026  | 0.000  | -0.037 | -0.346 | -0.932 | -0.757 |
| P21619 | Lmn2     | 0.066 | 0.186 | -0.179 | 0.000  | 0.032  | -0.265 | -0.402 | -0.177 |
| Q6NZC7 | Sec23ip  | 0.136 | 0.301 | 0.293  | 0.000  | -0.031 | -0.215 | -1.310 | -0.279 |
| Q922R8 | Pdia6    | 0.018 | 0.083 | 0.000  | 0.091  | -0.433 | 1.380  | 1.200  | 0.553  |
| P49710 | Hcls1    | 0.004 | 0.034 | -0.319 | 0.000  | 0.235  | -1.270 | -1.490 | -1.060 |
| Q9CY58 | Serbp1   | 0.592 | 0.864 | -0.242 | 0.000  | 0.112  | 0.215  | -0.198 | 0.139  |
| O89090 | Sp1      | 0.189 | 0.379 | 0.000  | 1.060  | -0.104 | -0.224 | -0.256 | -0.338 |
| P59017 | Bcl2l13  | 0.118 | 0.274 | 0.000  | -0.077 | 0.194  | -0.067 | -0.784 | -0.362 |
| Q9JI13 | Utp3     | 0.366 | 0.612 | 1.970  | -0.999 | 0.000  | 1.660  | 0.754  | 1.350  |
| P27659 | Rpl3     | 0.218 | 0.417 | 0.230  | -0.104 | 0.000  | 0.727  | 0.075  | 0.273  |
| P97807 | Fh       | 0.048 | 0.152 | 0.000  | 0.319  | -0.305 | 0.689  | 0.384  | 0.857  |
| P11983 | Tcp1     | 0.019 | 0.087 | 0.010  | -0.033 | 0.000  | -0.369 | -0.934 | -0.590 |
| Q9QY81 | Nup210   | 0.079 | 0.209 | 0.000  | 0.154  | -0.034 | -0.133 | -0.253 | -0.062 |
| Q9EQP2 | Ehd4     | 0.227 | 0.429 | 0.000  | 0.001  | -0.845 | 0.451  | 0.115  | -0.049 |
| Q8R010 | Aimp2    | 0.173 | 0.357 | 0.013  | 0.000  | -0.531 | -0.551 | -1.030 | -0.312 |
| Q8CBY8 | Dctn4    | 0.037 | 0.129 | 0.000  | -0.092 | 0.128  | -0.321 | -0.625 | -0.243 |
| Q3TBT3 | Tmem173  | 0.649 | 0.925 | -0.395 | 0.164  | 0.000  | -0.291 | -0.323 | 0.074  |

|        |         |       |       |        |        |        |        |        |        |
|--------|---------|-------|-------|--------|--------|--------|--------|--------|--------|
| P14733 | Lmnb1   | 0.060 | 0.175 | -0.138 | 0.000  | 0.107  | -0.348 | -0.608 | -0.184 |
| P17225 | Ptbp1   | 0.985 | 1.000 | -0.053 | 0.090  | 0.000  | -0.272 | -0.102 | 0.336  |
| P61979 | Hnrnpk  | 0.004 | 0.034 | -0.236 | 0.011  | 0.000  | -0.622 | -0.888 | -0.763 |
| P46935 | Nedd4   | 0.009 | 0.057 | 1.270  | 0.000  | -0.301 | 3.520  | 2.530  | 2.910  |
| Q99KV1 | Dnajb11 | 0.002 | 0.025 | 0.038  | 0.000  | -0.045 | 0.752  | 0.934  | 1.200  |
| Q9JJA4 | Wdr12   | 0.164 | 0.343 | 0.164  | 0.000  | -0.215 | -0.313 | -0.653 | -0.091 |
| Q9JHU4 | Dync1h1 | 0.241 | 0.450 | 0.000  | 0.014  | -0.111 | 0.549  | -0.014 | 0.098  |
| Q5PSV9 | Mdc1    | 0.020 | 0.088 | 0.000  | -0.100 | 0.030  | -0.538 | -0.554 | -0.234 |
| P07356 | Anxa2   | 0.002 | 0.028 | -0.294 | 0.146  | 0.000  | 0.920  | 0.824  | 1.030  |
| Q6PDM2 | Srsf1   | 0.015 | 0.076 | 0.288  | 0.000  | -0.003 | -0.389 | -0.976 | -0.902 |
| Q9Z1Q9 | Vars    | 0.018 | 0.083 | 0.137  | -0.048 | 0.000  | -0.459 | -1.210 | -0.842 |
| P22646 | Cd3e    | 0.501 | 0.766 | -0.349 | 0.000  | 0.371  | -0.475 | -0.277 | 0.156  |
| Q923D5 | Wbp11   | 0.022 | 0.095 | -0.054 | 0.000  | 0.115  | -0.351 | -0.733 | -0.346 |
| O08583 | Alyref  | 0.509 | 0.773 | -0.288 | 0.193  | 0.000  | -0.401 | 0.188  | 1.140  |
| Q8BGH2 | Samm50  | 0.000 | 0.013 | 0.000  | 0.083  | -0.194 | 0.973  | 0.871  | 0.934  |
| Q99KK7 | Dpp3    | 0.000 | 0.013 | -0.119 | 0.102  | 0.000  | -1.230 | -1.360 | -1.600 |
| P16546 | Sptan1  | 0.055 | 0.165 | -0.057 | 0.095  | 0.000  | 0.323  | 0.097  | 0.320  |
| Q8VIJ6 | Sfpq    | 0.012 | 0.066 | -0.229 | 0.123  | 0.000  | -0.574 | -0.596 | -0.442 |
| Q9CZR8 | Tsfm    | 0.707 | 0.983 | 0.245  | 0.000  | -0.207 | 0.426  | -0.475 | -0.282 |
| Q9D1J3 | Sarnp   | 0.287 | 0.512 | -0.551 | 0.000  | 0.172  | -0.814 | -0.430 | -0.184 |
| P23116 | Eif3a   | 0.339 | 0.578 | 0.109  | 0.000  | -0.242 | 0.055  | -0.402 | -0.373 |
| Q8K4Z5 | Sf3a1   | 0.029 | 0.110 | -0.065 | 0.185  | 0.000  | -0.670 | -0.424 | -0.241 |
| Q9WVA3 | Bub3    | 0.226 | 0.429 | -0.180 | 0.000  | 0.110  | -0.149 | -0.518 | -0.085 |
| Q8BFW7 | Lpp     | 0.000 | 0.009 | 0.000  | 0.546  | -0.074 | 4.720  | 4.080  | 4.430  |
| Q3TZZ7 | Esyt2   | 0.004 | 0.037 | -0.192 | 0.000  | 0.048  | 0.458  | 0.367  | 0.491  |
| P80314 | Cct2    | 0.030 | 0.113 | -0.001 | 0.000  | 0.055  | -0.220 | -0.792 | -0.640 |
| Q6PB66 | Lrpprc  | 0.035 | 0.125 | 0.000  | 0.121  | -0.292 | 0.941  | 0.428  | 0.430  |
| E9PVX6 | Mki67   | 0.500 | 0.765 | 0.712  | -0.541 | 0.000  | 0.430  | -0.788 | -0.647 |
| Q7Tsv4 | Pgm2    | 0.000 | 0.013 | 0.000  | -0.203 | 0.179  | -1.780 | -2.280 | -2.070 |
| Q9R0P3 | Esd     | 0.086 | 0.222 | 0.000  | 0.047  | -0.224 | -0.212 | -0.757 | -0.429 |
| Q9D824 | Fip111  | 0.562 | 0.831 | -0.526 | 0.000  | 0.347  | -0.360 | -0.548 | 0.118  |
| Q8CI51 | Pdim5   | 0.002 | 0.025 | 0.018  | 0.000  | -0.246 | 2.180  | 1.340  | 1.770  |
| Q99MR6 | Srrt    | 0.012 | 0.069 | 0.089  | -0.063 | 0.000  | -0.600 | -1.420 | -1.250 |
| P55194 | Sh3bp1  | 0.018 | 0.083 | -0.199 | 0.000  | 0.014  | -0.550 | -1.070 | -0.614 |
| Q922P9 | Glyr1   | 0.200 | 0.394 | -0.174 | 0.000  | 0.112  | -0.349 | -0.510 | 0.002  |
| Q9D819 | Ppa1    | 0.012 | 0.069 | 0.055  | -0.145 | 0.000  | -1.050 | -1.690 | -0.821 |
| Q9QUM0 | Itga2b  | 0.351 | 0.592 | 0.000  | 0.515  | -0.869 | -0.489 | -0.209 | -1.310 |
| Q8OU93 | Nup214  | 0.291 | 0.518 | -0.291 | 0.118  | 0.000  | -0.193 | -0.509 | -0.103 |
| Q8BVY0 | Rsl1d1  | 0.050 | 0.155 | 0.000  | -0.234 | 0.038  | -0.355 | -1.110 | -0.679 |
| O09106 | Hdac1   | 0.745 | 1.000 | -0.195 | 0.107  | 0.000  | -0.161 | -0.227 | 0.147  |
| O09111 | Ndufb11 | 0.001 | 0.018 | 0.019  | -0.197 | 0.000  | 0.578  | 0.575  | 0.648  |
| Q9D6R2 | Idh3a   | 0.546 | 0.814 | 0.000  | 0.280  | -0.166 | 0.748  | -0.097 | 0.040  |
| Q80WJ7 | Mtdh    | 0.233 | 0.439 | 0.000  | -0.069 | 0.038  | 0.134  | -0.029 | 0.382  |
| Q60611 | Satb1   | 0.855 | 1.000 | 0.000  | -0.019 | 0.104  | 0.646  | -1.180 | 0.293  |
| P40124 | Cap1    | 0.001 | 0.015 | 0.000  | 0.284  | -0.079 | -1.070 | -1.130 | -1.270 |
| Q9ERU9 | Ranbp2  | 0.147 | 0.315 | 0.000  | -0.026 | 0.041  | 0.012  | -0.328 | -0.218 |
| P08113 | Hsp90b1 | 0.004 | 0.035 | 0.176  | 0.000  | -0.151 | 1.090  | 0.696  | 0.949  |
| P63024 | Vamp3   | 0.003 | 0.033 | 0.045  | 0.000  | -0.153 | 0.674  | 0.557  | 0.918  |
| P54823 | Ddx6    | 0.098 | 0.242 | 0.066  | 0.000  | -0.011 | -0.081 | -0.692 | -0.327 |
| P13864 | Dnmt1   | 0.113 | 0.267 | 0.336  | 0.000  | -0.055 | -0.098 | -0.924 | -0.353 |
| O08784 | Tcof1   | 0.113 | 0.266 | -0.009 | 0.000  | 0.150  | -0.099 | -0.536 | -0.133 |
| Q9D1G1 | Rab1b   | 0.303 | 0.533 | 0.158  | -0.095 | 0.000  | -0.172 | -0.134 | 0.029  |
| Q99JY9 | Actr3   | 0.188 | 0.378 | 0.048  | -0.092 | 0.000  | 0.345  | 0.013  | 0.107  |
| P60710 | Actb    | 0.156 | 0.330 | -0.073 | 0.121  | 0.000  | -0.014 | -0.514 | -0.237 |
| P63260 | Actg1   | 0.156 | 0.330 | -0.073 | 0.121  | 0.000  | -0.014 | -0.514 | -0.237 |
| Q80V86 | Ints8   | 0.570 | 0.839 | -0.504 | 3.710  | 0.000  | 0.053  | 1.310  | -0.890 |
| Q61655 | Ddx19a  | 0.390 | 0.639 | 0.118  | -0.022 | 0.000  | 0.132  | -0.526 | -0.084 |
| P62830 | Rpl23   | 0.643 | 0.919 | 0.106  | -0.204 | 0.000  | 0.399  | -0.679 | -0.312 |
| Q9CQ92 | Fis1    | 0.078 | 0.209 | 0.240  | -0.067 | 0.000  | -0.226 | -0.500 | -0.127 |

|        |           |       |       |        |        |        |        |        |        |
|--------|-----------|-------|-------|--------|--------|--------|--------|--------|--------|
| P54276 | Msh6      | 0.033 | 0.120 | 0.135  | 0.000  | -0.179 | -0.428 | -1.340 | -0.957 |
| P06240 | Lck       | 0.294 | 0.521 | -0.202 | 0.459  | 0.000  | -0.260 | -0.257 | -0.001 |
| Q07235 | Serpine2  | 0.277 | 0.498 | 0.428  | 0.000  | -0.162 | 0.144  | -0.483 | -0.384 |
| P30681 | Hmgb2     | 0.095 | 0.238 | -0.015 | 0.000  | 0.040  | -0.144 | -0.615 | -0.195 |
| Q60953 | Pml       | 0.062 | 0.178 | 0.071  | 0.000  | -0.108 | -0.221 | -1.170 | -0.818 |
| Q9ESX5 | Dkc1      | 0.025 | 0.102 | 0.012  | 0.000  | -0.193 | -0.277 | -0.447 | -0.330 |
| Q62189 | Snrpa     | 0.029 | 0.111 | 0.000  | -0.283 | 0.089  | -0.543 | -0.927 | -0.493 |
| Q8VDD5 | Myh9      | 0.002 | 0.027 | 0.000  | 0.052  | -0.141 | 0.796  | 0.520  | 0.751  |
| Q922U1 | Prpf3     | 0.013 | 0.071 | -0.006 | 0.000  | 0.443  | -0.588 | -0.960 | -0.545 |
| Q78PY7 | Snd1      | 0.431 | 0.687 | 0.121  | 0.000  | -0.224 | 0.151  | -0.543 | -0.309 |
| Q80UG5 | Sept 9    | 0.237 | 0.444 | -0.272 | 0.086  | 0.000  | -0.200 | -0.429 | -0.138 |
| P24452 | Capg      | 0.026 | 0.104 | -0.297 | 0.189  | 0.000  | -0.617 | -0.622 | -0.450 |
| P70372 | Elavl1    | 0.445 | 0.702 | -0.426 | 0.124  | 0.000  | -0.293 | -0.336 | -0.126 |
| Q9D0W5 | Ppil1     | 0.009 | 0.056 | -0.094 | 0.000  | 0.110  | -0.708 | -1.100 | -0.574 |
| P17182 | Eno1      | 0.002 | 0.028 | 0.055  | -0.141 | 0.000  | -0.948 | -1.530 | -1.280 |
| Q61599 | Arhgdib   | 0.001 | 0.015 | 0.372  | -0.115 | 0.000  | -1.450 | -1.770 | -1.570 |
| P29758 | Oat       | 0.001 | 0.018 | 0.000  | 0.170  | -0.473 | 1.810  | 1.920  | 2.200  |
| Q01320 | Top2a     | 0.345 | 0.585 | 0.420  | 0.000  | -0.276 | 0.181  | -0.632 | -0.423 |
| Q9CYA0 | Creld2    | 0.202 | 0.398 | 0.461  | 0.000  | -0.153 | 0.057  | -0.768 | -0.358 |
| Q99KP6 | Prpf19    | 0.018 | 0.083 | 0.000  | -0.070 | 0.105  | -0.384 | -0.924 | -0.583 |
| Q9WV60 | Gsk3b     | 0.103 | 0.249 | 0.000  | -0.045 | 0.044  | -0.511 | -1.120 | -0.157 |
| Q80VD1 | Fam98b    | 0.136 | 0.301 | 0.000  | -0.052 | 0.036  | -0.205 | -0.328 | -0.014 |
| Q9Z2G6 | Sel1l     | 0.015 | 0.077 | 0.000  | 0.785  | -0.235 | 1.410  | 1.440  | 1.460  |
| Q8QZY1 | Eif3l     | 0.322 | 0.557 | 0.286  | 0.000  | -0.080 | 0.235  | -0.651 | -0.334 |
| Q9DBC7 | Prkar1a   | 0.005 | 0.042 | -0.209 | 0.003  | 0.000  | -0.670 | -0.996 | -0.671 |
| Q9QZE5 | Copg1     | 0.155 | 0.329 | -0.425 | 0.159  | 0.000  | -0.405 | -0.615 | -0.289 |
| O08749 | Dld       | 0.005 | 0.039 | 0.000  | 0.188  | -0.179 | 0.904  | 0.625  | 0.763  |
| Q9QXS1 | Plec      | 0.017 | 0.081 | -0.164 | 0.000  | 0.083  | 0.797  | 0.326  | 0.702  |
| P38647 | Hspa9     | 0.072 | 0.196 | 0.035  | 0.000  | -0.356 | 1.510  | 0.407  | 0.498  |
| P63038 | Hspd1     | 0.006 | 0.044 | 0.000  | 0.119  | -0.240 | 1.090  | 0.650  | 0.822  |
| Q99KJ8 | Dctn2     | 0.536 | 0.803 | -0.313 | 0.028  | 0.000  | -0.031 | -0.389 | -0.172 |
| Q9DBL1 | Acadsb    | 0.001 | 0.022 | 0.000  | 0.020  | -0.201 | 1.980  | 1.390  | 1.380  |
| Q61335 | Bcap31    | 0.080 | 0.212 | 0.000  | -0.052 | 0.226  | 1.140  | 0.266  | 0.636  |
| Q9Z2I0 | Letm1     | 0.002 | 0.025 | 0.000  | 0.057  | -0.198 | 0.565  | 0.495  | 0.591  |
| Q62318 | Trim28    | 0.170 | 0.352 | -0.106 | 0.039  | 0.000  | -0.141 | -0.502 | -0.101 |
| P84104 | Srsf3     | 0.070 | 0.193 | 0.568  | -0.014 | 0.000  | -0.104 | -0.988 | -0.770 |
| P62196 | Psmc5     | 0.040 | 0.136 | 0.000  | 0.308  | -0.008 | -0.201 | -0.818 | -0.531 |
| Q9D8E6 | Rpl4      | 0.054 | 0.163 | 0.321  | -0.021 | 0.000  | 0.782  | 0.316  | 0.637  |
| Q9CXR1 | Dhrs7     | 0.113 | 0.266 | 0.279  | 0.000  | -0.073 | 0.747  | 0.268  | 0.322  |
| Q9CWZ3 | Rbm8a     | 0.096 | 0.238 | 0.000  | 0.642  | -0.100 | -0.984 | -1.000 | -0.037 |
| Q07813 | Bax       | 0.323 | 0.559 | -0.110 | 0.000  | 0.085  | 0.671  | -0.114 | 0.210  |
| P68368 | Tuba4a    | 0.020 | 0.087 | 0.146  | 0.000  | -0.226 | -0.480 | -1.030 | -1.100 |
| Q99JY0 | Hadhb     | 0.462 | 0.721 | -0.070 | 0.350  | 0.000  | 0.625  | -0.024 | 0.237  |
| Q8BX90 | Fndc3a    | 0.002 | 0.025 | 0.055  | 0.000  | -0.428 | 1.370  | 1.110  | 1.570  |
| Q3UPF5 | Zc3hav1   | 0.070 | 0.193 | -0.342 | 0.000  | 0.012  | -0.376 | -0.579 | -0.367 |
| Q91X20 | Ash2l     | 0.063 | 0.180 | -0.240 | 0.077  | 0.000  | -0.381 | -0.538 | -0.236 |
| Q8BTM8 | Flna      | 0.293 | 0.520 | 0.000  | 0.121  | -0.418 | 0.299  | 0.000  | 0.080  |
| P60122 | Ruvbl1    | 0.055 | 0.165 | 0.000  | -0.042 | 0.052  | -0.122 | -0.461 | -0.238 |
| Q61823 | Pdcd4     | 0.011 | 0.065 | -0.098 | 0.000  | 0.177  | -1.090 | -2.030 | -1.100 |
| P60335 | Pcbp1     | 0.101 | 0.246 | 0.188  | -0.140 | 0.000  | -0.087 | -0.939 | -0.627 |
| O88569 | Hnrnpa2b1 | 0.148 | 0.318 | -0.304 | 0.073  | 0.000  | -0.472 | -0.454 | -0.145 |
| Q9DBG6 | Rpn2      | 0.000 | 0.012 | 0.000  | 0.145  | -0.216 | 1.580  | 1.360  | 1.520  |
| P17426 | Ap2a1     | 0.687 | 0.963 | 0.021  | 0.000  | -0.170 | 0.374  | -0.291 | 0.030  |
| Q9D903 | Ebna1bp2  | 0.166 | 0.347 | -0.081 | 0.000  | 0.201  | -0.212 | -0.623 | -0.032 |
| Q9Z110 | Aldh18a1  | 0.109 | 0.261 | 0.000  | 0.052  | -0.331 | 1.350  | 0.197  | 0.449  |
| Q8VDK1 | Nit1      | 0.269 | 0.488 | 0.029  | 0.000  | -0.100 | -0.074 | -0.053 | -0.391 |
| Q9CPY7 | Lap3      | 0.806 | 1.000 | 0.158  | 0.000  | -0.383 | 0.568  | -0.516 | 0.000  |
| P14211 | Calr      | 0.017 | 0.080 | 0.000  | 0.269  | -0.256 | 0.717  | 0.570  | 0.599  |
| Q91VI7 | Rnh1      | 0.157 | 0.333 | 0.147  | 0.000  | -0.013 | 0.060  | -0.933 | -0.519 |

|        |          |       |       |        |        |        |        |        |        |
|--------|----------|-------|-------|--------|--------|--------|--------|--------|--------|
| Q9JHJ0 | Tmod3    | 0.961 | 1.000 | 0.000  | 0.019  | -0.389 | 0.016  | -0.217 | -0.146 |
| P10107 | Anxa1    | 0.215 | 0.412 | 1.740  | 0.000  | -0.057 | 2.140  | 1.090  | 1.410  |
| O70145 | Ncf2     | 0.290 | 0.517 | 1.390  | 0.000  | -0.200 | 0.382  | -0.806 | -0.670 |
| P70429 | Evl      | 0.271 | 0.490 | 0.032  | -0.049 | 0.000  | -0.053 | -1.080 | -0.145 |
| Q3U9G9 | Lbr      | 0.634 | 0.910 | -0.053 | 0.000  | 0.182  | 0.005  | -0.311 | 0.185  |
| P50516 | Atp6v1a  | 0.725 | 1.000 | 0.551  | 0.000  | -0.094 | 0.623  | -0.032 | 0.181  |
| P50247 | Ahcy     | 0.001 | 0.020 | -0.059 | 0.000  | 0.042  | -1.130 | -1.720 | -1.480 |
| P40142 | Tkt      | 0.039 | 0.132 | 0.533  | -0.106 | 0.000  | -0.340 | -1.110 | -0.864 |
| Q8BH59 | Slc25a12 | 0.037 | 0.127 | -0.084 | 0.153  | 0.000  | 0.368  | 0.204  | 0.480  |
| Q9R0X4 | Acot9    | 0.058 | 0.171 | 0.000  | 0.694  | -0.021 | 1.030  | 0.770  | 0.829  |
| O08914 | Faah     | 0.027 | 0.106 | 0.000  | 0.057  | -0.048 | -0.181 | -0.299 | -0.124 |
| Q61550 | Rad21    | 0.309 | 0.542 | 0.000  | -0.027 | 0.146  | -0.235 | -0.456 | 0.157  |
| P52875 | Tmem165  | 0.029 | 0.110 | 0.372  | 0.000  | -0.179 | 1.140  | 0.576  | 1.390  |
| Q3TIX9 | Usp39    | 0.018 | 0.083 | 0.270  | -0.160 | 0.000  | -0.496 | -0.734 | -0.449 |
| P55302 | Lrpap1   | 0.001 | 0.015 | 0.000  | 0.001  | -0.525 | 1.780  | 1.710  | 2.060  |
| Q3U0V2 | Tradd    | 0.076 | 0.204 | 0.000  | 0.234  | -0.079 | -0.090 | -0.626 | -0.805 |
| P21958 | Tap1     | 0.423 | 0.677 | -0.148 | 0.237  | 0.000  | -0.065 | -0.190 | 0.007  |
| Q3TXS7 | Psmd1    | 0.130 | 0.293 | 0.328  | -0.138 | 0.000  | -0.098 | -0.383 | -0.247 |
| Q99PV0 | Prpf8    | 0.020 | 0.087 | -0.023 | 0.225  | 0.000  | -0.196 | -0.284 | -0.261 |
| Q9Z0P5 | Twf2     | 0.004 | 0.034 | 0.062  | -0.102 | 0.000  | -1.230 | -1.830 | -1.120 |
| Q62261 | Sptbn1   | 0.014 | 0.072 | 0.000  | 0.243  | -0.084 | 0.494  | 0.512  | 0.429  |
| F6ZDS4 | Tpr      | 0.023 | 0.096 | -0.076 | 0.000  | 0.080  | -0.279 | -0.547 | -0.266 |
| P11835 | Itgb2    | 0.068 | 0.188 | 0.255  | -0.053 | 0.000  | -0.095 | -0.485 | -0.320 |
| Q9CR51 | Atp6v1g1 | 0.816 | 1.000 | 0.620  | 0.000  | -0.365 | 0.327  | -0.391 | 0.055  |
| P32921 | Wars     | 0.102 | 0.248 | 0.000  | -0.106 | 0.007  | -0.096 | -0.377 | -0.196 |
| Q9JIK5 | Ddx21    | 0.023 | 0.096 | 0.038  | 0.000  | -0.075 | -0.306 | -0.743 | -0.429 |
| P43404 | Zap70    | 0.038 | 0.131 | -0.465 | 0.041  | 0.000  | -0.669 | -0.946 | -0.589 |
| Q5FWK3 | Arhgap1  | 0.296 | 0.524 | 0.076  | -0.093 | 0.000  | 0.053  | -0.363 | -0.173 |
| Q8BH61 | F13a1    | 0.387 | 0.635 | 0.693  | 0.000  | -0.022 | 0.346  | -0.483 | -0.175 |
| Q8BWT1 | Acaa2    | 0.089 | 0.228 | 0.000  | 0.088  | -0.212 | 0.592  | 0.136  | 0.245  |
| P19973 | Lsp1     | 0.002 | 0.026 | 0.000  | -0.001 | 0.158  | -1.090 | -1.130 | -0.706 |
| P48678 | Lmna     | 0.002 | 0.028 | 0.000  | 0.046  | -0.348 | 0.967  | 0.745  | 0.972  |
| G5E870 | Trip12   | 0.026 | 0.105 | -0.220 | 0.190  | 0.000  | -0.368 | -0.610 | -0.474 |
| Q9JHS9 | Cwc15    | 0.035 | 0.124 | 0.000  | -0.060 | 0.174  | -0.357 | -0.766 | -1.240 |
| O54824 | Il16     | 0.400 | 0.650 | -0.327 | 0.000  | 0.082  | -0.272 | -0.328 | -0.065 |
| Q91YI4 | Arrb2    | 0.043 | 0.141 | 0.421  | -0.090 | 0.000  | -0.306 | -1.050 | -0.648 |
| Q99JY3 | Gimap4   | 0.000 | 0.014 | -0.308 | 0.000  | 0.029  | -1.380 | -1.590 | -1.690 |
| P08003 | Pdia4    | 0.111 | 0.264 | 0.208  | 0.000  | -0.016 | 0.512  | 0.143  | 0.322  |
| O35295 | Purb     | 0.019 | 0.085 | -0.254 | 0.142  | 0.000  | -0.477 | -0.948 | -0.748 |
| P62821 | Rab1A    | 0.807 | 1.000 | 0.232  | -0.032 | 0.000  | 0.737  | -0.085 | -0.211 |
| Q08943 | Ssrp1    | 0.047 | 0.149 | 0.000  | 0.059  | -0.129 | -0.264 | -0.982 | -0.659 |
| Q9CW46 | Raver1   | 0.212 | 0.409 | -0.429 | 0.000  | 0.009  | -0.636 | -0.311 | -0.288 |
| Q8BL97 | Srsf7    | 0.044 | 0.142 | 0.415  | 0.000  | -0.051 | -0.237 | -0.986 | -0.723 |
| Q8C7E9 | Cstf2t   | 0.231 | 0.435 | 0.000  | -0.128 | 0.732  | -4.370 | -0.082 | -0.715 |
| P49722 | Psma2    | 0.000 | 0.014 | -0.245 | 0.000  | 0.011  | -1.230 | -1.480 | -1.240 |
| Q9D8W5 | Psmd12   | 0.045 | 0.146 | 0.000  | 0.153  | -0.090 | -0.282 | -1.060 | -0.637 |
| Q9WUB3 | Pygm     | 0.033 | 0.121 | -0.282 | 0.000  | 0.033  | -1.330 | -0.756 | -0.562 |
| Q99N84 | Mrps18b  | 0.001 | 0.019 | -0.100 | 0.262  | 0.000  | 1.290  | 1.020  | 1.220  |
| Q99LX0 | Park7    | 0.001 | 0.015 | 0.016  | -0.257 | 0.000  | -1.140 | -1.450 | -1.350 |
| Q3UHJ0 | Aak1     | 0.314 | 0.547 | -0.257 | 0.000  | 0.048  | -0.279 | -0.575 | -0.009 |
| Q9DAU1 | Cnpy3    | 0.036 | 0.125 | 0.021  | 0.000  | -0.450 | 0.436  | 0.377  | 0.266  |
| Q60710 | Samhd1   | 0.000 | 0.013 | -0.120 | 0.000  | 0.000  | -0.783 | -1.010 | -0.907 |
| Q91ZW3 | Smarca5  | 0.092 | 0.233 | 0.000  | 0.038  | -0.092 | -0.173 | -0.514 | -0.168 |
| Q9CQF9 | Pcyox1   | 0.003 | 0.031 | 0.261  | 0.000  | -0.610 | 1.640  | 1.550  | 1.550  |
| Q3UN02 | Lclat1   | 0.023 | 0.096 | -0.171 | 0.817  | 0.000  | 1.370  | 1.200  | 1.660  |
| Q80YR5 | Safb2    | 0.033 | 0.119 | -0.279 | 0.036  | 0.000  | -0.582 | -0.899 | -0.420 |
| P26039 | Tln1     | 0.041 | 0.137 | 0.059  | 0.000  | -0.282 | -0.358 | -1.020 | -1.000 |
| Q76MZ3 | Ppp2r1a  | 0.013 | 0.069 | 0.000  | 0.029  | -0.018 | -0.282 | -0.657 | -0.641 |
| P97371 | Psme1    | 0.001 | 0.022 | -0.041 | 0.476  | 0.000  | -1.210 | -1.170 | -1.120 |

|        |          |       |       |        |        |        |        |        |        |
|--------|----------|-------|-------|--------|--------|--------|--------|--------|--------|
| Q9QUJ7 | Acsl4    | 0.326 | 0.563 | 0.186  | 0.000  | -0.010 | 0.509  | -0.057 | 0.321  |
| Q9CQ06 | Mrpl24   | 0.031 | 0.115 | 0.158  | 0.000  | -0.175 | 0.302  | 0.820  | 0.865  |
| Q80X90 | Flnb     | 0.001 | 0.014 | 0.069  | 0.000  | -0.289 | 2.350  | 1.740  | 2.050  |
| Q9R0E1 | Plod3    | 0.000 | 0.009 | 0.000  | 0.480  | -0.111 | 3.740  | 3.370  | 3.760  |
| Q9WU78 | Pdcd6ip  | 0.102 | 0.247 | -0.082 | 0.153  | 0.000  | -0.146 | -0.697 | -0.246 |
| Q8BIQ5 | Cstf2    | 0.421 | 0.675 | -0.437 | 0.000  | 0.414  | -1.200 | -0.354 | 0.232  |
| P67984 | Rpl22    | 0.254 | 0.467 | 0.247  | 0.000  | -0.018 | 0.449  | 0.053  | 0.300  |
| P47740 | Aldh3a2  | 0.057 | 0.169 | 0.000  | 0.097  | -0.121 | 0.310  | 0.102  | 0.328  |
| Q9CPV4 | Glod4    | 0.023 | 0.096 | 0.000  | 0.150  | -0.049 | -0.326 | -0.824 | -0.470 |
| P26040 | Ezr      | 0.241 | 0.451 | 0.000  | 0.009  | -0.085 | 0.234  | -0.093 | 0.286  |
| P42227 | Stat3    | 0.103 | 0.250 | 0.000  | -0.155 | 0.131  | -0.089 | -0.977 | -0.688 |
| Q9Z1N5 | Ddx39b   | 0.760 | 1.000 | -0.016 | 0.782  | 0.000  | 0.109  | 0.138  | 0.256  |
| P01831 | Thy1     | 0.024 | 0.098 | 0.000  | -0.028 | 0.249  | 0.606  | 0.378  | 0.771  |
| Q8K0C4 | Cyp51a1  | 0.000 | 0.008 | 0.000  | 0.282  | -0.189 | 3.810  | 3.390  | 3.830  |
| Q9D0L7 | Armc10   | 0.027 | 0.107 | -0.131 | 0.052  | 0.000  | -0.301 | -0.431 | -0.208 |
| Q8BMP6 | Acbd3    | 0.380 | 0.629 | 0.334  | -0.249 | 0.000  | 0.447  | -1.140 | -0.709 |
| O35892 | Sp100    | 0.119 | 0.276 | 0.000  | -0.023 | 0.093  | -0.048 | -0.538 | -0.220 |
| P36371 | Tap2     | 0.787 | 1.000 | -0.225 | 0.273  | 0.000  | -0.153 | -0.078 | 0.133  |
| Q9CZ44 | Nsfl1c   | 0.000 | 0.011 | -0.089 | 0.000  | 0.161  | -1.340 | -1.640 | -1.510 |
| Q9CR61 | Ndufb7   | 0.020 | 0.088 | 0.000  | -0.043 | 0.113  | 0.717  | 0.435  | 1.080  |
| P23492 | Pnp      | 0.010 | 0.060 | 0.405  | 0.000  | -0.271 | -0.763 | -1.050 | -1.040 |
| O88685 | Psmc3    | 0.008 | 0.054 | 0.000  | 0.126  | -0.124 | -0.422 | -0.569 | -0.370 |
| P62960 | Ybx1     | 0.498 | 0.764 | 0.017  | 0.000  | -0.011 | 0.279  | -0.611 | -0.238 |
| Q8C0I1 | Agps     | 0.043 | 0.142 | 0.639  | 0.000  | -0.154 | 1.310  | 0.764  | 0.956  |
| Q8R326 | Pspc1    | 0.029 | 0.110 | 0.000  | 0.345  | -0.071 | -0.607 | -0.409 | -0.294 |
| Q9DC69 | Ndufa9   | 0.004 | 0.037 | -0.072 | 0.102  | 0.000  | 0.741  | 0.442  | 0.635  |
| Q80YV3 | Trrap    | 0.070 | 0.193 | -0.087 | 0.000  | 0.024  | -0.210 | -0.361 | -0.101 |
| P47941 | Crkl     | 0.001 | 0.017 | 0.039  | -0.088 | 0.000  | -1.070 | -1.520 | -1.270 |
| P11276 | Fn1      | 0.000 | 0.013 | 0.759  | 0.000  | -0.029 | 4.210  | 3.600  | 3.790  |
| Q9D1M7 | Fkbp11   | 0.001 | 0.014 | 0.000  | 0.157  | -0.617 | 2.940  | 2.470  | 2.970  |
| P56399 | Usp5     | 0.041 | 0.136 | -0.064 | 0.055  | 0.000  | -0.344 | -1.040 | -1.390 |
| Q9CQN1 | Trap1    | 0.459 | 0.719 | 0.170  | 0.000  | -0.139 | 0.175  | -0.335 | -0.254 |
| O89023 | Tpp1     | 0.463 | 0.722 | 0.691  | 0.000  | -0.365 | 0.480  | -0.634 | -0.724 |
| Q8BHD7 | Ptbp3    | 0.069 | 0.192 | 0.000  | 0.316  | -0.167 | -0.178 | -0.748 | -0.545 |
| P11881 | Itpr1    | 0.010 | 0.059 | 0.000  | 0.236  | -0.244 | 0.838  | 0.632  | 0.646  |
| Q99KI3 | Emc3     | 0.001 | 0.015 | 0.000  | 0.228  | -0.156 | 1.460  | 1.280  | 1.590  |
| Q9WTI7 | Myo1c    | 0.000 | 0.012 | 0.000  | 0.063  | -0.194 | 2.750  | 2.170  | 2.720  |
| Q61210 | Arhgef1  | 0.005 | 0.041 | 0.000  | 0.001  | -0.005 | -0.416 | -0.797 | -0.644 |
| P48036 | Anxa5    | 0.005 | 0.042 | 0.000  | 0.177  | -0.377 | 0.835  | 0.814  | 0.988  |
| B2RY56 | Rbm25    | 0.013 | 0.071 | 0.000  | -0.016 | 0.053  | -0.439 | -1.080 | -0.945 |
| P15702 | Spn      | 0.027 | 0.105 | -0.280 | 0.000  | 0.175  | -0.428 | -0.534 | -0.621 |
| P12815 | Pdcd6    | 0.518 | 0.782 | -0.178 | 0.236  | 0.000  | -0.267 | 0.110  | -0.131 |
| Q9D6Z1 | Nop56    | 0.058 | 0.171 | -0.091 | 0.006  | 0.000  | -0.160 | -0.587 | -0.343 |
| Q9EPB4 | Pycard   | 0.002 | 0.023 | 0.029  | 0.000  | -0.084 | -1.520 | -1.930 | -1.240 |
| D0QMC3 | Mndal    | 0.015 | 0.076 | -0.179 | 0.041  | 0.000  | -0.432 | -0.756 | -0.459 |
| P80313 | Cct7     | 0.026 | 0.104 | 0.099  | 0.000  | -0.035 | -0.245 | -0.699 | -0.421 |
| Q9Z2Z6 | Slc25a20 | 0.006 | 0.043 | 0.161  | 0.000  | -0.081 | 0.953  | 0.633  | 0.619  |
| Q8VHE0 | Sec63    | 0.001 | 0.014 | 0.000  | 0.208  | -0.401 | 2.140  | 1.810  | 1.980  |
| Q64674 | Srm      | 0.120 | 0.277 | 0.297  | 0.000  | -0.271 | -0.147 | -0.522 | -0.530 |
| P99027 | Rplp2    | 0.515 | 0.779 | 0.066  | -0.014 | 0.000  | -0.010 | -0.366 | 0.116  |
| Q921H8 | Acaa1a   | 0.168 | 0.349 | 0.077  | 0.000  | -0.377 | 0.732  | -0.098 | 0.503  |
| P21550 | Eno3     | 0.001 | 0.022 | 0.000  | 0.285  | -0.011 | -0.823 | -1.150 | -1.090 |
| Q08024 | Cbfb     | 0.018 | 0.083 | -0.165 | 0.091  | 0.000  | -0.345 | -0.749 | -0.625 |
| Q6P2L6 | Whsc111  | 0.352 | 0.593 | -0.300 | 0.000  | 0.252  | -0.124 | -1.230 | -0.019 |
| Q62523 | Zyx      | 0.182 | 0.369 | -0.086 | 0.110  | 0.000  | 0.768  | -0.019 | 0.410  |
| Q9DB05 | Napa     | 0.787 | 1.000 | 0.217  | 0.000  | -0.130 | 0.223  | -0.284 | -0.005 |
| Q99K48 | Nono     | 0.023 | 0.096 | -0.200 | 0.000  | 0.002  | -0.434 | -0.635 | -0.333 |
| O09044 | Snap23   | 0.002 | 0.023 | 0.028  | 0.000  | -0.068 | 0.650  | 0.420  | 0.604  |
| Q61233 | Lcp1     | 0.000 | 0.008 | 0.000  | 0.104  | -0.046 | -1.290 | -1.480 | -1.380 |

|        |         |       |       |        |        |        |        |        |        |
|--------|---------|-------|-------|--------|--------|--------|--------|--------|--------|
| P24527 | Lta4h   | 0.001 | 0.019 | 0.296  | 0.000  | -0.168 | -1.520 | -2.110 | -1.850 |
| P52480 | Pkm     | 0.003 | 0.031 | 0.033  | 0.000  | -0.045 | -0.658 | -1.130 | -1.020 |
| Q60520 | Sin3a   | 0.049 | 0.154 | -0.146 | 0.000  | 0.086  | -0.240 | -0.604 | -0.309 |
| Q68FL6 | Mars    | 0.598 | 0.871 | 0.310  | 0.000  | -0.218 | 0.343  | -0.524 | -0.239 |
| Q8BV49 | Pyhin1  | 0.026 | 0.105 | 0.000  | -0.130 | 0.140  | -0.427 | -0.852 | -0.407 |
| Q01730 | Rsu1    | 0.373 | 0.622 | 0.000  | 0.204  | -0.850 | 0.353  | 0.275  | -0.182 |
| O08553 | Dpysl2  | 0.008 | 0.055 | -0.381 | 0.023  | 0.000  | -0.799 | -1.040 | -0.780 |
| Q3U7R1 | Esyt1   | 0.377 | 0.625 | -0.054 | 0.266  | 0.000  | 0.169  | 0.087  | 0.307  |
| Q9JJX6 | P2rx4   | 0.610 | 0.885 | 0.645  | -0.068 | 0.000  | 0.517  | -0.345 | -0.170 |
| Q91W90 | Txndc5  | 0.003 | 0.033 | 0.000  | 0.085  | -0.303 | 0.869  | 0.642  | 0.871  |
| P28740 | Kif2a   | 0.128 | 0.291 | 0.126  | 0.000  | -0.368 | -0.159 | -0.728 | -0.764 |
| Q9WVA4 | Tagln2  | 0.004 | 0.038 | -0.036 | 0.121  | 0.000  | -0.400 | -0.593 | -0.378 |
| Q99P72 | Rtn4    | 0.000 | 0.006 | 0.000  | 0.066  | -0.069 | 1.910  | 1.670  | 1.840  |
| P09405 | Ncl     | 0.005 | 0.042 | 0.000  | 0.013  | -0.184 | -0.731 | -1.300 | -1.140 |
| Q9ERS2 | Ndufa13 | 0.056 | 0.168 | 0.038  | -0.179 | 0.000  | 0.652  | 0.143  | 0.876  |
| P29391 | Ftl1    | 0.048 | 0.152 | 0.334  | -0.304 | 0.000  | -0.448 | -1.460 | -0.987 |
| P70288 | Hdac2   | 0.731 | 1.000 | 0.000  | 0.251  | -0.259 | -0.156 | -0.163 | 0.118  |
| Q8VE70 | Pdcd10  | 0.005 | 0.039 | 0.000  | -0.139 | 0.036  | -0.455 | -0.496 | -0.690 |
| P19783 | Cox4i1  | 0.004 | 0.038 | 0.100  | -0.024 | 0.000  | 0.711  | 0.422  | 0.696  |
| Q9CZ42 | Naxd    | 0.001 | 0.018 | 0.148  | 0.000  | -0.050 | 1.030  | 0.765  | 0.960  |
| P61967 | Ap1s1   | 0.008 | 0.054 | 0.000  | -0.021 | 0.223  | -0.424 | -0.864 | -0.773 |
| P42225 | Stat1   | 0.005 | 0.039 | -0.079 | 0.271  | 0.000  | -0.603 | -0.992 | -0.866 |
| Q9CVB6 | Arpc2   | 0.043 | 0.142 | 0.217  | -0.103 | 0.000  | 0.408  | 0.250  | 0.503  |
| Q99LC3 | Ndufa10 | 0.006 | 0.047 | 0.000  | 0.010  | -0.249 | 0.718  | 0.460  | 0.860  |
| Q6PFD9 | Nup98   | 0.115 | 0.270 | -0.095 | 0.000  | 0.190  | -0.155 | -0.472 | -0.120 |
| Q8R2Y8 | Pthr2   | 0.015 | 0.077 | -0.265 | 0.190  | 0.000  | 1.240  | 1.150  | 2.290  |
| P54728 | Rad23b  | 0.023 | 0.096 | -0.121 | 0.083  | 0.000  | -0.526 | -1.300 | -0.766 |
| Q9WTM5 | Ruvbl2  | 0.218 | 0.417 | 0.000  | 0.106  | -0.153 | -0.146 | -0.350 | -0.056 |
| Q9R1P4 | Psma1   | 0.012 | 0.067 | -0.187 | 0.086  | 0.000  | -0.997 | -2.060 | -1.320 |
| Q8R4N0 | Clybl   | 0.061 | 0.177 | 0.182  | 0.000  | -0.138 | 0.704  | 0.176  | 0.694  |
| Q91VC3 | Elf4a3  | 0.006 | 0.046 | 0.000  | -0.016 | 0.085  | -0.409 | -0.644 | -0.359 |
| O88696 | Clpp    | 0.016 | 0.078 | 0.000  | 0.043  | -0.364 | 0.863  | 0.401  | 0.665  |
| P70699 | Gaa     | 0.001 | 0.022 | 0.000  | -0.360 | 0.035  | 1.170  | 0.910  | 1.070  |
| Q99NB9 | Sf3b1   | 0.056 | 0.166 | -0.164 | 0.007  | 0.000  | -0.508 | -0.725 | -0.208 |
| Q8BHL5 | Elmo2   | 0.073 | 0.198 | -0.116 | 0.032  | 0.000  | -0.361 | -0.697 | -1.500 |
| Q9D1Q6 | Erp44   | 0.003 | 0.033 | 0.018  | 0.000  | -0.372 | 0.878  | 0.686  | 0.710  |
| D3Z6Q9 | Bin2    | 0.005 | 0.039 | -0.352 | 0.269  | 0.000  | -1.050 | -1.470 | -1.300 |
| Q80Y81 | Elac2   | 0.624 | 0.899 | 0.000  | -0.208 | 0.155  | 0.131  | -0.831 | 0.116  |
| P24668 | M6pr    | 0.297 | 0.524 | 0.000  | -1.460 | 0.258  | 0.120  | 0.295  | 0.320  |
| Q8BH43 | Wasf2   | 0.373 | 0.621 | -0.073 | 0.000  | 0.024  | 0.173  | -0.125 | 0.272  |
| P61358 | Rpl27   | 0.051 | 0.157 | 0.000  | 0.389  | -0.168 | 0.470  | 0.530  | 0.698  |
| Q8BP47 | Nars    | 0.300 | 0.529 | 0.063  | 0.000  | -0.627 | 0.134  | -0.049 | 0.174  |
| P42208 | Sept 2  | 0.001 | 0.022 | 0.181  | 0.000  | -0.114 | 0.895  | 0.778  | 1.010  |
| Q9CRD0 | Ociad1  | 0.184 | 0.372 | -0.379 | 0.247  | 0.000  | -0.636 | -0.622 | -0.097 |
| Q6PDG5 | Smarcc2 | 0.084 | 0.220 | 0.000  | -0.027 | 0.113  | -0.028 | -0.406 | -0.317 |
| Q64105 | Spr     | 0.003 | 0.033 | -0.370 | 0.096  | 0.000  | -1.650 | -1.710 | -1.160 |
| P25206 | Mcm3    | 0.066 | 0.185 | 0.280  | 0.000  | -0.196 | -0.205 | -1.110 | -0.943 |
| P08752 | Gnai2   | 0.756 | 1.000 | 0.074  | 0.000  | -0.107 | 0.169  | -0.194 | -0.132 |
| O35382 | Exoc4   | 0.173 | 0.357 | 0.171  | 0.000  | -0.131 | 0.080  | -0.688 | -0.729 |
| O08788 | Dctn1   | 0.369 | 0.616 | 0.018  | -0.153 | 0.000  | 0.258  | -0.787 | -0.596 |
| P24161 | Cd247   | 0.811 | 1.000 | -0.617 | 0.000  | 0.247  | -0.627 | 0.147  | 0.420  |
| Q9CW03 | Smc3    | 0.037 | 0.128 | 0.000  | -0.055 | 0.001  | -0.243 | -0.484 | -0.187 |
| Q8CIE6 | Copa    | 0.118 | 0.274 | 0.168  | 0.000  | -0.012 | -0.029 | -0.703 | -0.326 |
| Q9ESP1 | Sdf211  | 0.816 | 1.000 | 0.000  | 0.023  | -0.647 | -0.293 | -0.576 | 0.035  |
| P09528 | Fth1    | 0.085 | 0.220 | 0.442  | -0.233 | 0.000  | -0.225 | -1.190 | -0.715 |
| Q9DB77 | Uqcrc2  | 0.140 | 0.306 | 0.000  | 0.125  | -0.097 | 0.556  | 0.046  | 0.312  |
| O08810 | Eftud2  | 0.022 | 0.095 | 0.000  | 0.151  | -0.093 | -0.237 | -0.287 | -0.220 |
| Q8C4Q6 | Aida    | 0.026 | 0.105 | -0.212 | 0.550  | 0.000  | 1.430  | 1.020  | 0.842  |
| Q05186 | Rcn1    | 0.000 | 0.003 | -0.133 | 0.156  | 0.000  | 3.830  | 3.540  | 3.760  |

|        |         |       |       |        |        |        |        |        |        |
|--------|---------|-------|-------|--------|--------|--------|--------|--------|--------|
| Q8K183 | Pdxk    | 0.017 | 0.081 | 0.000  | -0.383 | 0.018  | -0.842 | -1.590 | -1.010 |
| P17710 | Hk1     | 0.085 | 0.221 | -0.211 | 0.114  | 0.000  | -0.278 | -0.528 | -0.214 |
| Q61425 | Hadh    | 0.375 | 0.623 | -0.733 | 0.214  | 0.000  | 0.578  | 0.284  | -0.255 |
| Q8C570 | Rae1    | 0.961 | 1.000 | -0.124 | 0.114  | 0.000  | -0.099 | 0.017  | 0.085  |
| O54941 | Smarce1 | 0.092 | 0.232 | -0.025 | 0.000  | 0.203  | -0.414 | -0.671 | -0.041 |
| Q9Z1Q2 | Abhd16a | 0.066 | 0.186 | 0.213  | -0.145 | 0.000  | 0.518  | 0.389  | 1.190  |
| P10518 | Alad    | 0.007 | 0.050 | 0.086  | -0.152 | 0.000  | -1.240 | -2.500 | -1.940 |
| Q9Z1Z2 | Strap   | 0.011 | 0.064 | 0.000  | -0.050 | 0.159  | -0.265 | -0.534 | -0.473 |
| Q99MN9 | Pccb    | 0.003 | 0.032 | 0.000  | 0.238  | -0.023 | 0.894  | 0.712  | 1.040  |
| Q9DBG3 | Ap2b1   | 0.155 | 0.329 | 0.000  | 0.158  | -0.099 | 0.695  | 0.126  | 0.236  |
| Q8VDN2 | Atp1a1  | 0.012 | 0.069 | -0.147 | 0.017  | 0.000  | 0.628  | 0.290  | 0.682  |
| P14901 | Hmox1   | 0.394 | 0.643 | 0.207  | 0.000  | -0.907 | -0.150 | -0.921 | -0.834 |
| O35083 | Agpat1  | 0.035 | 0.123 | 0.411  | 0.000  | -0.054 | 1.020  | 0.828  | 0.500  |
| Q3U1F9 | Pag1    | 0.317 | 0.550 | 0.105  | -0.106 | 0.000  | -0.473 | -0.720 | 0.213  |
| Q8BZN6 | Dock10  | 0.210 | 0.406 | -0.532 | 0.000  | 0.228  | -0.481 | -1.600 | -0.303 |
| P24063 | Itgal   | 0.054 | 0.163 | -0.246 | 0.010  | 0.000  | -0.641 | -0.514 | -0.247 |
| Q8BMS1 | Hadha   | 0.932 | 1.000 | 0.027  | 0.000  | -0.269 | 0.492  | -0.475 | -0.178 |
| Q9R1T4 | Sept 6  | 0.016 | 0.078 | -0.316 | 0.001  | 0.000  | -0.583 | -0.779 | -0.525 |
| P38060 | Hmgcl   | 0.061 | 0.177 | 0.000  | 0.148  | -0.178 | 0.592  | 0.202  | 0.328  |
| Q61191 | Hcfc1   | 0.920 | 1.000 | -0.021 | 0.000  | 0.544  | 0.085  | -0.064 | 0.590  |
| P06151 | Ldha    | 0.001 | 0.018 | -0.165 | 0.115  | 0.000  | -0.980 | -1.190 | -0.934 |
| Q9CZ13 | Uqcrc1  | 0.015 | 0.076 | 0.081  | 0.000  | -0.051 | 0.660  | 0.292  | 0.464  |
| Q3TDQ1 | Stt3b   | 0.003 | 0.031 | 0.054  | 0.000  | -0.451 | 1.190  | 0.890  | 1.070  |
| Q922W5 | Pycr1   | 0.000 | 0.014 | 0.208  | 0.000  | -0.219 | 2.510  | 1.920  | 2.420  |
| Q91W39 | Ncoa5   | 0.060 | 0.175 | 0.026  | 0.000  | -0.041 | -0.220 | -0.959 | -0.518 |
| P63168 | Dynl1   | 0.922 | 1.000 | 0.502  | -0.203 | 0.000  | 0.013  | -0.054 | 0.267  |
| Q9EQH3 | Vps35   | 0.223 | 0.424 | 0.352  | -0.082 | 0.000  | 0.112  | -0.639 | -0.304 |
| P97287 | Mcl1    | 0.225 | 0.427 | 0.197  | 0.000  | -0.777 | 0.487  | -0.153 | 1.300  |
| P50544 | Acadvl  | 0.245 | 0.456 | 0.000  | 0.061  | -0.285 | 0.866  | -0.022 | 0.132  |
| Q9DC51 | Gnai3   | 0.950 | 1.000 | 0.028  | -0.131 | 0.000  | 0.178  | -0.388 | 0.145  |
| Q8BK64 | Ahsa1   | 0.072 | 0.197 | 0.000  | 0.218  | -0.021 | -0.131 | -1.130 | -0.729 |
| Q9WTX5 | Skp1    | 0.009 | 0.057 | 0.000  | 0.142  | -0.147 | -0.508 | -0.496 | -0.360 |
| P42209 | Sept 1  | 0.040 | 0.135 | -0.383 | 0.163  | 0.000  | -0.531 | -0.641 | -0.536 |
| P32233 | Drg1    | 0.735 | 1.000 | 0.167  | -0.118 | 0.000  | 0.094  | -0.600 | 0.256  |
| P26043 | Rdx     | 0.042 | 0.138 | 0.000  | 0.671  | -0.017 | 0.763  | 1.170  | 1.520  |
| P63158 | Hmgb1   | 0.474 | 0.734 | 0.000  | -0.236 | 0.219  | 0.196  | -0.585 | -0.247 |
| Q9R1C7 | Prpf40a | 0.057 | 0.169 | 0.000  | 0.036  | -0.175 | -0.196 | -0.679 | -0.769 |
| P62192 | Psmc1   | 0.016 | 0.078 | 0.000  | 0.007  | -0.059 | -0.317 | -0.671 | -0.390 |
| Q61656 | Ddx5    | 0.021 | 0.090 | 0.145  | 0.000  | -0.259 | -0.449 | -0.909 | -0.754 |
| Q8CAQ8 | Immt    | 0.003 | 0.032 | 0.000  | 0.109  | -0.145 | 0.915  | 0.583  | 0.795  |
| P56480 | Atp5b   | 0.009 | 0.057 | 0.000  | 0.258  | -0.162 | 0.723  | 0.568  | 0.808  |
| P60867 | Rps20   | 0.015 | 0.077 | 0.165  | 0.000  | -0.084 | -0.470 | -0.687 | -0.324 |
| Q9QXZ0 | Macf1   | 0.523 | 0.789 | 0.215  | -0.056 | 0.000  | 0.505  | -0.100 | 0.160  |
| P97351 | Rps3a   | 0.907 | 1.000 | 0.091  | -0.290 | 0.000  | 0.303  | -0.279 | -0.309 |
| Q8CEC0 | Nup88   | 0.199 | 0.394 | -0.116 | 0.129  | 0.000  | -0.168 | -0.370 | -0.019 |
| Q8R5J9 | Arl6ip5 | 0.031 | 0.115 | -0.357 | 0.100  | 0.000  | 0.322  | 0.545  | 0.805  |
| Q64514 | Tpp2    | 0.416 | 0.669 | 0.008  | 0.000  | -1.190 | -0.674 | -0.816 | -0.777 |
| Q6GQT9 | Nomo1   | 0.001 | 0.018 | 0.066  | 0.000  | -0.516 | 2.070  | 1.620  | 1.860  |
| Q9CYG7 | Tom34   | 0.013 | 0.071 | -0.013 | 0.210  | 0.000  | -0.338 | -0.800 | -0.588 |
| Q9Z329 | Itpr2   | 0.713 | 0.989 | -0.251 | 0.000  | 0.041  | -0.190 | -0.184 | 0.027  |
| Q8CCJ3 | Ufl1    | 0.399 | 0.650 | 0.000  | -0.401 | 0.074  | -0.084 | -0.609 | -0.240 |
| P46460 | Nsf     | 0.134 | 0.298 | 0.377  | 0.000  | -0.134 | 0.037  | -0.914 | -0.723 |
| P61164 | Actr1a  | 0.105 | 0.252 | 0.017  | -0.031 | 0.000  | -0.230 | -0.245 | -0.015 |
| O35857 | Timm44  | 0.016 | 0.078 | 0.231  | 0.000  | -0.162 | 0.827  | 0.450  | 0.765  |
| Q3THE2 | Myl12b  | 0.009 | 0.056 | -0.141 | 0.510  | 0.000  | 0.987  | 1.260  | 1.210  |
| Q60972 | Rbbp4   | 0.188 | 0.378 | -0.072 | 0.000  | 0.231  | -0.232 | -0.800 | -0.009 |
| P09411 | Pgk1    | 0.021 | 0.091 | 0.132  | -0.121 | 0.000  | -0.542 | -1.100 | -0.544 |
| Q9WUQ2 | Preb    | 0.007 | 0.048 | -0.081 | 0.122  | 0.000  | 0.725  | 0.406  | 0.640  |
| Q8CC88 | Vwa8    | 0.942 | 1.000 | 0.000  | 0.045  | -0.313 | 0.847  | -0.752 | -0.481 |

|        |          |       |       |        |        |        |        |        |        |
|--------|----------|-------|-------|--------|--------|--------|--------|--------|--------|
| Q9D7N9 | Apmap    | 0.049 | 0.154 | 0.018  | 0.000  | -0.061 | 0.406  | 0.078  | 0.386  |
| O54782 | Man2b2   | 0.003 | 0.033 | 0.000  | 0.230  | -0.073 | -1.030 | -1.770 | -1.620 |
| P80316 | Cct5     | 0.042 | 0.140 | 0.066  | -0.104 | 0.000  | -0.220 | -0.838 | -0.649 |
| Q8BMJ2 | Lars     | 0.881 | 1.000 | 0.252  | 0.000  | -0.100 | 0.278  | -0.242 | 0.028  |
| Q9DBZ1 | lkbip    | 0.000 | 0.002 | 0.000  | -0.098 | 0.101  | 6.270  | 5.940  | 6.260  |
| P43406 | ltgav    | 0.000 | 0.013 | 0.172  | -0.250 | 0.000  | 2.300  | 1.820  | 2.020  |
| P10711 | Tcea1    | 0.098 | 0.242 | 0.028  | -0.179 | 0.000  | -0.348 | -0.662 | -0.165 |
| Q9D2V8 | Mfsd10   | 0.007 | 0.051 | 0.000  | 0.022  | -0.232 | 0.826  | 0.424  | 0.713  |
| Q91VD9 | Ndufs1   | 0.002 | 0.025 | 0.000  | 0.197  | -0.065 | 0.847  | 0.648  | 0.786  |
| Q9D2V7 | Coro7    | 0.000 | 0.008 | 0.000  | -0.014 | 0.005  | -1.400 | -1.690 | -1.670 |
| Q8BFR5 | Tufm     | 0.440 | 0.697 | 0.165  | 0.000  | -0.339 | 0.256  | -0.698 | -0.598 |
| P47911 | Rpl6     | 0.036 | 0.126 | 0.095  | 0.000  | -0.087 | 0.610  | 0.185  | 0.488  |
| Q14C51 | Ptcd3    | 0.001 | 0.019 | 0.000  | 0.011  | -0.187 | 0.717  | 0.554  | 0.741  |
| P62814 | Atp6v1b2 | 0.820 | 1.000 | 0.689  | 0.000  | -0.027 | 0.606  | -0.188 | -0.001 |
| Q9WV55 | Vapa     | 0.035 | 0.124 | 0.000  | 0.399  | -0.125 | 0.518  | 0.621  | 0.719  |
| P49718 | Mcm5     | 0.432 | 0.688 | 0.140  | 0.000  | -0.032 | 0.135  | -0.802 | -0.001 |
| P97760 | Polr2c   | 0.231 | 0.436 | -0.024 | 0.099  | 0.000  | -0.330 | -1.380 | 0.008  |
| P10605 | Ctsb     | 0.113 | 0.266 | 0.436  | 0.000  | -0.385 | -0.190 | -1.040 | -0.842 |
| Q9CU62 | Smc1a    | 0.086 | 0.222 | 0.000  | -0.003 | 0.011  | -0.155 | -0.506 | -0.143 |
| P97855 | G3bp1    | 0.321 | 0.557 | 0.068  | -0.159 | 0.000  | -0.136 | -1.010 | -0.025 |
| Q6PDQ2 | Chd4     | 0.367 | 0.615 | 0.000  | -0.102 | 0.117  | -0.201 | -0.551 | 0.134  |
| Q3TBD2 | Hmha1    | 0.000 | 0.014 | 0.000  | -0.131 | 0.051  | -1.160 | -1.530 | -1.440 |
| P26450 | Pik3r1   | 0.468 | 0.727 | 0.000  | 0.958  | -0.100 | -0.021 | 0.030  | 0.038  |
| Q62087 | Pon3     | 0.014 | 0.073 | -0.127 | 0.000  | 0.034  | 0.275  | 0.248  | 0.476  |
| Q7TMK9 | Syncrip  | 0.677 | 0.953 | 0.000  | 0.301  | -0.343 | 0.126  | -0.176 | 0.326  |
| Q9CZX9 | Emc4     | 0.015 | 0.076 | -0.448 | 0.367  | 0.000  | 0.940  | 1.180  | 0.890  |
| Q91VK1 | Bzw2     | 0.115 | 0.269 | 0.350  | 0.000  | -0.019 | -0.027 | -0.652 | -0.298 |
| Q3TKT4 | Smarca4  | 0.343 | 0.583 | 0.057  | -0.076 | 0.000  | 0.065  | -0.478 | -0.132 |
| Q9DB85 | Rrp8     | 0.469 | 0.728 | -0.371 | 0.000  | 0.165  | -0.132 | -0.454 | -0.090 |
| P17427 | Ap2a2    | 0.383 | 0.632 | 0.415  | 0.000  | -0.703 | 0.757  | -0.016 | 0.153  |
| Q99L47 | St13     | 0.014 | 0.072 | -0.081 | 0.036  | 0.000  | -0.526 | -1.130 | -0.692 |
| Q99P58 | Rab27b   | 0.322 | 0.557 | 0.000  | 0.955  | -1.050 | -0.404 | -0.436 | -1.680 |
| P50580 | Pa2g4    | 0.244 | 0.454 | 0.328  | -0.040 | 0.000  | 0.166  | -0.734 | -0.310 |
| Q8R0G9 | Nup133   | 0.563 | 0.832 | 0.000  | -0.023 | 0.096  | 0.037  | -0.449 | 0.137  |
| Q9QX60 | Dguok    | 0.708 | 0.984 | -0.077 | 0.150  | 0.000  | 0.045  | -0.050 | 0.196  |
| Q9JL8  | Sars2    | 0.446 | 0.703 | 0.281  | 0.000  | -0.050 | 0.559  | -0.022 | 0.196  |
| Q8CGC7 | Eprs     | 0.795 | 1.000 | 0.120  | 0.000  | -0.150 | 0.337  | -0.462 | -0.109 |
| P57780 | Actn4    | 0.021 | 0.091 | -0.172 | 0.037  | 0.000  | -0.274 | -0.547 | -0.455 |
| P14152 | Mdh1     | 0.000 | 0.009 | -0.168 | 0.000  | 0.080  | -1.560 | -1.840 | -1.800 |
| Q6P4T2 | Snrnp200 | 0.013 | 0.069 | -0.020 | 0.137  | 0.000  | -0.250 | -0.524 | -0.332 |
| Q99JR1 | Sfxn1    | 0.018 | 0.083 | 0.000  | 0.180  | -0.179 | 0.403  | 0.408  | 0.393  |
| Q9DCD0 | Pgd      | 0.071 | 0.195 | 0.917  | 0.000  | -0.095 | -0.280 | -1.050 | -0.718 |
| Q9Z0H3 | Smarca1  | 0.030 | 0.113 | 0.000  | -0.066 | 0.179  | -0.294 | -0.516 | -0.219 |
| O89086 | Rbm3     | 0.009 | 0.056 | -0.209 | 0.057  | 0.000  | -0.430 | -0.622 | -0.681 |
| Q922V4 | Plrg1    | 0.064 | 0.181 | 0.000  | 0.843  | -0.233 | -0.721 | -0.595 | -0.591 |
| Q6A026 | Pds5a    | 0.449 | 0.707 | -0.685 | 0.000  | 0.044  | -0.448 | -0.612 | -0.234 |
| Q80Y14 | Glx5     | 0.112 | 0.265 | 0.079  | 0.000  | -0.218 | 0.910  | 0.185  | 0.266  |
| P50136 | Bckdha   | 0.099 | 0.243 | 0.031  | 0.000  | -0.341 | 0.421  | 0.014  | 0.389  |
| Q31125 | Slc39a7  | 0.027 | 0.105 | 0.000  | -0.045 | 0.406  | 0.591  | 0.957  | 1.230  |
| P54071 | Idh2     | 0.004 | 0.036 | 0.054  | 0.000  | -0.276 | 1.440  | 0.889  | 0.986  |
| F7BJB9 | Morc3    | 0.118 | 0.274 | 0.164  | -0.166 | 0.000  | -0.243 | -0.973 | -0.297 |
| Q61584 | Fxr1     | 0.129 | 0.291 | -0.026 | 0.120  | 0.000  | -0.203 | -0.299 | 0.011  |
| Q921T2 | Tor1aip1 | 0.690 | 0.965 | -0.053 | 0.000  | 0.307  | 0.445  | -0.208 | 0.311  |
| Q7TT37 | lkbkap   | 0.264 | 0.481 | 0.088  | 0.000  | -0.089 | 0.136  | -0.527 | -0.447 |
| Q9EQ61 | Pes1     | 0.132 | 0.295 | 0.201  | 0.000  | -0.198 | -0.092 | -0.992 | -0.526 |
| Q8C1A5 | Thop1    | 0.006 | 0.046 | 0.158  | -0.220 | 0.000  | -0.983 | -1.770 | -1.750 |
| O55222 | Ilk      | 0.020 | 0.087 | 0.022  | 0.000  | -0.417 | 0.976  | 0.527  | 0.493  |
| Q91VV4 | Dennd2d  | 0.016 | 0.079 | -0.287 | 0.000  | 0.220  | -0.634 | -0.864 | -0.591 |
| Q80XI4 | Pip4k2b  | 0.801 | 1.000 | 0.042  | -0.073 | 0.000  | 0.261  | -0.324 | -0.109 |



|        |          |       |       |        |        |        |        |        |        |
|--------|----------|-------|-------|--------|--------|--------|--------|--------|--------|
| Q91V41 | Rab14    | 0.967 | 1.000 | 0.000  | 0.178  | -0.083 | 0.345  | -0.065 | -0.209 |
| P56960 | Exosc10  | 0.282 | 0.506 | 0.835  | 0.000  | -0.252 | 0.633  | 0.441  | 0.788  |
| Q8BXA1 | Golim4   | 0.007 | 0.050 | 0.892  | 0.000  | -0.477 | 2.510  | 2.100  | 2.200  |
| Q9WTP7 | Ak3      | 0.037 | 0.129 | -0.146 | 0.101  | 0.000  | 0.809  | 0.233  | 0.598  |
| Q3U0V1 | Khsrp    | 0.421 | 0.676 | -0.157 | 0.000  | 0.015  | -0.296 | -0.296 | 0.081  |
| O54692 | Zw10     | 0.471 | 0.730 | 0.324  | -0.222 | 0.000  | 0.295  | 0.022  | 0.210  |
| Q9DBR7 | Ppp1r12a | 0.013 | 0.071 | -0.181 | 0.000  | 0.044  | -0.554 | -1.010 | -0.600 |
| Q61881 | Mcm7     | 0.037 | 0.127 | 0.253  | 0.000  | -0.194 | -0.352 | -1.070 | -0.804 |
| Q9EP69 | Sacm1l   | 0.008 | 0.051 | -0.137 | 0.052  | 0.000  | 0.613  | 0.321  | 0.520  |
| P63330 | Ppp2ca   | 0.032 | 0.118 | 0.000  | -0.177 | 0.241  | -0.502 | -0.750 | -0.337 |
| Q9CQE5 | Rgs10    | 0.001 | 0.018 | -0.183 | 0.000  | 0.053  | -1.900 | -1.880 | -1.380 |
| Q6NVE9 | Pptc7    | 0.557 | 0.825 | 0.000  | -0.054 | 0.016  | 0.205  | -0.490 | -0.140 |
| Q7TMF3 | Ndufa12  | 0.011 | 0.064 | -0.161 | 0.000  | 0.141  | 0.792  | 0.547  | 1.110  |
| O35874 | Slc1a4   | 0.008 | 0.051 | -2.820 | 0.000  | 0.039  | 3.660  | 3.800  | 3.980  |
| P11032 | Gzma     | 0.448 | 0.706 | -1.520 | 0.000  | 0.204  | -1.490 | -1.050 | -0.367 |
| Q80VW7 | Akna     | 0.096 | 0.238 | -0.012 | 0.069  | 0.000  | -0.965 | -1.600 | -0.137 |
| Q921M7 | Fam49b   | 0.000 | 0.009 | 0.127  | 0.000  | -0.104 | -1.080 | -1.160 | -1.120 |
| O35465 | Fkbp8    | 0.521 | 0.786 | 0.000  | 0.167  | -0.029 | 0.317  | -0.227 | -0.452 |
| P12970 | Rpl7a    | 0.049 | 0.154 | 0.141  | -0.105 | 0.000  | 0.570  | 0.175  | 0.428  |
| O35643 | Ap1b1    | 0.185 | 0.374 | 0.145  | 0.000  | -0.102 | -0.013 | -0.683 | -0.260 |
| P61982 | Ywhag    | 0.016 | 0.078 | 0.076  | 0.000  | -0.065 | -0.399 | -0.977 | -0.678 |
| Q9CXY6 | Ilf2     | 0.540 | 0.807 | 0.000  | 0.631  | -0.035 | -0.337 | 0.060  | 0.300  |
| O70503 | Hsd17b12 | 0.014 | 0.072 | 0.001  | 0.000  | -0.328 | 1.430  | 0.851  | 0.653  |
| Q62376 | Snmp70   | 0.125 | 0.285 | -0.253 | 0.000  | 1.590  | -0.713 | -0.893 | -0.482 |
| P62702 | Rps4x    | 0.826 | 1.000 | 0.036  | 0.000  | -0.324 | 0.307  | -0.757 | -0.072 |
| Q61029 | Tmpo     | 0.756 | 1.000 | -0.325 | 0.000  | 0.312  | -0.177 | -0.353 | 0.258  |
| Q8K3G5 | Vrk3     | 0.070 | 0.193 | -0.071 | 0.000  | 0.328  | -0.503 | -0.539 | -0.092 |
| Q8R016 | Blmh     | 0.021 | 0.091 | -0.097 | 0.256  | 0.000  | -1.320 | -1.100 | -0.472 |
| A2AF47 | Dock11   | 0.001 | 0.018 | 0.000  | 0.134  | -0.011 | -0.552 | -0.771 | -0.648 |
| Q9EQQ9 | Mgea5    | 0.066 | 0.186 | -0.118 | 0.185  | 0.000  | -0.295 | -0.900 | -0.343 |
| Q8VCW4 | Unc93b1  | 0.699 | 0.975 | 0.532  | -0.017 | 0.000  | 0.616  | 0.022  | 0.192  |
| Q60932 | Vdac1    | 0.006 | 0.046 | 0.000  | 0.313  | -0.052 | 1.240  | 1.010  | 1.700  |
| P68040 | Rack1    | 0.095 | 0.237 | 0.132  | 0.000  | -0.220 | -0.151 | -0.721 | -0.490 |
| Q6ZQI3 | Mlec     | 0.323 | 0.558 | 0.076  | 0.000  | -0.122 | 1.290  | -0.531 | 1.210  |
| Q60597 | Ogdh     | 0.007 | 0.048 | 0.000  | 0.045  | -0.239 | 0.747  | 0.432  | 0.587  |
| Q61316 | Hspa4    | 0.002 | 0.027 | 0.000  | -0.007 | 0.001  | -0.700 | -1.140 | -0.857 |
| P26369 | U2af2    | 0.063 | 0.181 | 0.204  | 0.000  | -0.149 | -0.162 | -0.840 | -0.740 |
| Q9ESZ8 | Gtf2i    | 0.049 | 0.154 | -0.230 | 0.072  | 0.000  | -0.284 | -0.490 | -0.318 |
| O08900 | Ikzf3    | 0.585 | 0.857 | -0.536 | 0.000  | 0.072  | -0.517 | -0.398 | 0.008  |
| Q99P88 | Nup155   | 0.894 | 1.000 | -0.030 | 0.199  | 0.000  | 0.139  | -0.001 | -0.006 |
| Q99K85 | Psat1    | 0.006 | 0.044 | 0.000  | 0.027  | -0.015 | -0.509 | -0.996 | -0.778 |
| Q69Z99 | Znf512   | 0.404 | 0.655 | -0.111 | 0.000  | 0.395  | -0.071 | -0.745 | 0.203  |
| Q78IK4 | Apool    | 0.010 | 0.060 | -0.062 | 0.205  | 0.000  | 0.712  | 0.459  | 0.823  |
| P35821 | Ptpn1    | 0.031 | 0.116 | -0.040 | 0.235  | 0.000  | -0.162 | -0.284 | -0.302 |
| Q91YT0 | Ndufv1   | 0.001 | 0.019 | 0.000  | 0.034  | -0.076 | 0.817  | 0.553  | 0.688  |
| Q91ZA3 | Pcca     | 0.004 | 0.037 | 0.000  | 0.273  | -0.086 | 0.822  | 0.667  | 0.847  |
| P46471 | Psmc2    | 0.133 | 0.297 | 0.000  | 0.036  | -0.095 | -0.069 | -0.984 | -0.512 |
| Q65Z40 | Wapl     | 0.122 | 0.280 | 0.000  | 0.100  | -0.214 | -0.278 | -0.555 | -0.160 |
| Q5SSI6 | Utp18    | 0.118 | 0.274 | 0.035  | 0.000  | -0.326 | -0.227 | -0.724 | -0.437 |
| Q61464 | Znf638   | 0.087 | 0.224 | -0.106 | 0.232  | 0.000  | -0.212 | -0.535 | -0.164 |
| Q8VDP4 | Ccar2    | 0.001 | 0.019 | -0.213 | 0.000  | 0.026  | -1.020 | -1.310 | -1.030 |
| P54923 | Adprh    | 0.020 | 0.089 | -0.015 | 0.000  | 0.174  | -1.590 | -3.200 | -1.430 |
| Q9QZQ8 | H2afy    | 0.640 | 0.916 | 0.308  | -0.121 | 0.000  | 0.027  | 0.161  | 0.210  |
| Q3UV70 | Pdp1     | 0.009 | 0.056 | -0.168 | 0.000  | 0.071  | 0.763  | 0.401  | 0.775  |
| Q922D8 | Mthfd1   | 0.080 | 0.212 | 0.193  | 0.000  | -0.406 | -0.292 | -0.898 | -0.884 |
| Q6ZQ38 | Cand1    | 0.009 | 0.057 | -0.021 | 0.028  | 0.000  | -0.389 | -0.813 | -0.557 |
| P02468 | Lamc1    | 0.000 | 0.011 | 0.000  | 0.405  | -0.653 | 4.850  | 4.390  | 4.910  |
| Q9WUP7 | Uchl5    | 0.001 | 0.022 | 0.106  | 0.000  | -0.173 | -0.684 | -0.856 | -0.786 |
| O70133 | Dhx9     | 0.008 | 0.054 | -0.147 | 0.112  | 0.000  | -0.357 | -0.417 | -0.383 |

|        |         |       |       |        |        |        |        |        |        |
|--------|---------|-------|-------|--------|--------|--------|--------|--------|--------|
| P57776 | Eef1d   | 0.010 | 0.058 | 0.131  | -0.085 | 0.000  | -0.355 | -0.700 | -0.662 |
| Q9D1J1 | Necap2  | 0.072 | 0.197 | 0.000  | 0.059  | -0.305 | -0.584 | -0.378 | -1.140 |
| P51174 | Acadl   | 0.039 | 0.132 | 0.000  | 0.343  | -0.012 | 0.526  | 0.424  | 0.475  |
| Q8VI75 | Ipo4    | 0.133 | 0.296 | 0.315  | -0.020 | 0.000  | 1.170  | 0.277  | 0.490  |
| O55131 | Sept 7  | 0.373 | 0.621 | 0.000  | 0.100  | -0.111 | 0.425  | -0.163 | 0.292  |
| Q9D0F3 | Lman1   | 0.008 | 0.054 | 0.000  | 0.082  | -0.462 | 2.150  | 1.680  | 1.050  |
| P06797 | Ctsl    | 0.055 | 0.166 | 0.060  | -0.053 | 0.000  | -0.223 | -0.865 | -0.442 |
| Q8K4Z3 | Naxe    | 0.013 | 0.071 | 0.012  | 0.000  | -0.125 | 0.324  | 0.340  | 0.156  |
| P26638 | Sars    | 0.134 | 0.298 | 0.000  | 0.015  | -0.002 | -0.210 | -0.327 | 0.004  |
| Q9ERK4 | Cse1l   | 0.041 | 0.138 | 0.073  | -0.029 | 0.000  | -0.350 | -1.430 | -0.960 |
| Q9R233 | Tapbp   | 0.550 | 0.819 | -0.278 | 0.096  | 0.000  | -0.148 | -0.045 | -0.232 |
| Q78ZA7 | Nap1l4  | 0.009 | 0.056 | -0.293 | 0.000  | 0.003  | -0.919 | -1.530 | -0.967 |
| Q9D7S9 | Chmp5   | 0.646 | 0.923 | 0.226  | -2.780 | 0.000  | -0.323 | -0.670 | -0.105 |
| Q8CHY6 | Gatad2a | 0.072 | 0.196 | -0.214 | 0.000  | 0.239  | -0.313 | -1.050 | -0.493 |
| Q5SQX6 | Cyfp2   | 0.133 | 0.297 | 0.000  | -0.073 | 0.396  | -0.157 | -0.338 | -0.099 |
| Q61103 | Dpf2    | 0.005 | 0.039 | -0.147 | 0.000  | 0.059  | -0.516 | -0.628 | -0.419 |
| Q80TH2 | Erbin   | 0.102 | 0.248 | 0.004  | 0.000  | -0.191 | 0.359  | -0.014 | 0.435  |
| Q9DB29 | Iah1    | 0.002 | 0.024 | -0.084 | 0.000  | 0.019  | -0.725 | -1.100 | -0.844 |
| P08775 | Polr2a  | 0.010 | 0.059 | 0.000  | -0.066 | 0.050  | -0.270 | -0.476 | -0.290 |
| A2ADY9 | Ddi2    | 0.042 | 0.140 | 0.078  | -0.450 | 0.000  | -0.584 | -1.520 | -1.060 |
| Q9Z0M6 | Cd97    | 0.222 | 0.423 | 0.067  | -0.258 | 0.000  | -0.186 | -0.412 | -0.150 |
| Q99KI0 | Aco2    | 0.135 | 0.299 | 0.000  | 0.042  | -0.166 | 0.553  | 0.087  | 0.138  |
| P26443 | Glud1   | 0.007 | 0.048 | -0.208 | 0.207  | 0.000  | 0.756  | 0.579  | 0.813  |
| P01899 | H2-D1   | 0.854 | 1.000 | 0.000  | 0.322  | -0.021 | 0.070  | 0.088  | 0.212  |
| Q9QWR8 | Naga    | 0.347 | 0.588 | 0.711  | -0.217 | 0.000  | 0.309  | -0.481 | -0.619 |
| P56395 | Cyb5a   | 0.102 | 0.247 | 0.000  | 0.774  | -0.122 | 0.724  | 0.805  | 0.954  |
| Q9QYC0 | Add1    | 0.099 | 0.243 | 0.258  | -0.225 | 0.000  | -0.105 | -0.792 | -0.814 |
| Q9DBS1 | Tmem43  | 0.001 | 0.019 | 0.127  | -0.398 | 0.000  | 1.340  | 1.310  | 1.460  |
| Q8CCF0 | Prpf31  | 0.340 | 0.579 | 0.000  | -0.040 | 0.902  | 0.248  | -0.333 | -0.206 |
| Q8BMF4 | Dlat    | 0.002 | 0.025 | 0.000  | 0.245  | -0.071 | 1.060  | 0.823  | 1.080  |
| P70398 | Usp9x   | 0.156 | 0.330 | 0.000  | 0.167  | -0.051 | 0.059  | -0.847 | -0.528 |
| P09103 | P4hb    | 0.001 | 0.019 | 0.181  | 0.000  | -0.258 | 1.550  | 1.180  | 1.470  |
| P46062 | Sipa1   | 0.122 | 0.280 | 0.000  | -0.687 | 0.146  | -1.190 | -0.856 | -0.453 |
| Q8BRH0 | Tmtc3   | 0.001 | 0.019 | -0.049 | 0.564  | 0.000  | 2.350  | 1.990  | 2.490  |
| Q9Z2I9 | Sucla2  | 0.144 | 0.311 | 0.045  | 0.000  | -0.226 | 0.968  | 0.063  | 0.320  |
| Q9DCS9 | Ndufb10 | 0.006 | 0.043 | 0.000  | 0.250  | -0.106 | 0.628  | 0.918  | 0.805  |
| P17751 | Tpi1    | 0.001 | 0.019 | -0.153 | 0.052  | 0.000  | -1.010 | -1.410 | -1.170 |
| Q99MN1 | Kars    | 0.095 | 0.237 | 0.000  | 0.246  | -0.487 | -0.474 | -0.558 | -0.660 |
| Q8C3X8 | Lmf2    | 0.001 | 0.022 | -0.449 | 0.291  | 0.000  | 1.800  | 2.180  | 2.370  |
| Q8R123 | Flad1   | 0.186 | 0.376 | 0.107  | 0.000  | -0.001 | -0.107 | -0.914 | -0.144 |
| Q8VCT3 | Rnpep   | 0.006 | 0.047 | 0.307  | 0.000  | -0.067 | -0.773 | -1.480 | -1.230 |
| Q8BGW0 | Themis  | 0.127 | 0.288 | -1.320 | 0.000  | 0.443  | -1.890 | -1.260 | -1.100 |
| Q8CI94 | Pygb    | 0.009 | 0.058 | -0.215 | 0.120  | 0.000  | -0.661 | -1.230 | -0.895 |
| P70295 | Aup1    | 0.223 | 0.424 | -0.237 | 0.153  | 0.000  | 0.075  | 0.109  | 0.499  |
| Q8BSY0 | Asph    | 0.000 | 0.014 | 0.141  | 0.000  | -0.607 | 3.050  | 2.490  | 2.970  |
| Q91WJ8 | Fubp1   | 0.460 | 0.719 | -0.102 | 0.177  | 0.000  | -0.201 | -0.216 | 0.143  |
| Q8VBT0 | Tmx1    | 0.047 | 0.149 | 0.000  | 0.316  | -0.123 | 0.858  | 0.556  | 0.392  |
| P10852 | Slc3a2  | 0.031 | 0.115 | 0.358  | -0.051 | 0.000  | 1.070  | 0.533  | 0.706  |
| Q6NV83 | U2surp  | 0.018 | 0.083 | 0.000  | 0.005  | -0.147 | -0.422 | -0.985 | -0.714 |
| Q61937 | Npm1    | 0.054 | 0.164 | 0.268  | -0.137 | 0.000  | -0.286 | -1.550 | -1.340 |
| Q9JMH6 | Txnrd1  | 0.030 | 0.114 | 0.000  | -0.115 | 0.093  | -0.408 | -1.270 | -1.320 |
| Q8VEK3 | Hnrnpu  | 0.023 | 0.096 | 0.000  | 0.135  | -0.052 | -0.278 | -0.465 | -0.202 |
| P62843 | Rps15   | 0.638 | 0.914 | 0.152  | -0.159 | 0.000  | 0.269  | -0.156 | 0.113  |
| P08207 | S100a10 | 0.150 | 0.321 | -1.010 | 0.000  | 0.570  | 0.678  | 0.482  | 0.974  |
| Q9CSH3 | Dis3    | 0.019 | 0.087 | -0.143 | 0.044  | 0.000  | -0.478 | -0.855 | -0.426 |
| Q3UZA1 | Rcsd1   | 0.010 | 0.060 | 0.278  | -0.314 | 0.000  | -0.995 | -1.930 | -1.520 |
| Q8BP92 | Rcn2    | 0.000 | 0.011 | -0.104 | 0.495  | 0.000  | 3.300  | 2.950  | 3.320  |
| P51150 | Rab7a   | 0.539 | 0.807 | 0.095  | 0.000  | -0.023 | 0.282  | -0.085 | 0.100  |
| Q35226 | Psmd4   | 0.124 | 0.283 | 0.193  | 0.000  | -0.170 | -0.493 | -1.620 | -0.319 |

|        |          |       |       |        |        |        |        |        |        |
|--------|----------|-------|-------|--------|--------|--------|--------|--------|--------|
| P42669 | Pura     | 0.003 | 0.033 | -0.125 | 0.129  | 0.000  | -0.642 | -0.748 | -0.504 |
| Q9D2G2 | Dist     | 0.003 | 0.033 | 0.000  | 0.150  | -0.204 | 0.862  | 0.626  | 0.867  |
| Q9CRB2 | Nhp2     | 0.145 | 0.314 | 0.135  | -0.347 | 0.000  | -0.114 | -0.877 | -0.684 |
| Q9WV32 | Arpc1b   | 0.004 | 0.034 | 0.000  | -0.036 | 0.060  | 0.284  | 0.204  | 0.307  |
| Q8CDM1 | Atad2    | 0.200 | 0.394 | -0.108 | 0.046  | 0.000  | -0.369 | -0.528 | 0.035  |
| Q9D154 | Serpib1a | 0.050 | 0.155 | 1.640  | 0.000  | -0.016 | -0.530 | -1.950 | -1.950 |
| Q8BVE3 | Atp6v1h  | 0.761 | 1.000 | 0.447  | 0.000  | -0.035 | 0.476  | -0.415 | 0.057  |
| O09110 | Map2k3   | 0.051 | 0.158 | 0.000  | 0.028  | -0.378 | 0.174  | 0.286  | 0.414  |
| P14206 | Rpsa     | 0.136 | 0.301 | 0.104  | -0.167 | 0.000  | -0.043 | -0.645 | -0.462 |
| P62849 | Rps24    | 0.381 | 0.630 | 0.000  | 0.389  | -0.243 | 0.128  | 0.548  | 0.148  |
| Q8K224 | Nat10    | 0.136 | 0.300 | 0.000  | 0.122  | -0.081 | 0.017  | -0.643 | -0.503 |
| P63101 | Ywhaz    | 0.001 | 0.015 | 0.000  | -0.021 | 0.113  | -1.140 | -1.610 | -1.370 |
| Q80ZK0 | Mrps10   | 0.027 | 0.107 | 0.000  | 0.562  | -0.484 | 1.350  | 0.904  | 1.690  |
| O08547 | Sec22b   | 0.089 | 0.229 | -0.213 | 0.184  | 0.000  | 0.660  | 0.106  | 0.678  |
| Q9WTQ5 | Akap12   | 0.001 | 0.019 | 0.602  | 0.000  | -1.060 | 4.110  | 3.850  | 4.090  |
| P37040 | Por      | 0.001 | 0.018 | 0.000  | 0.126  | -0.066 | 0.875  | 0.704  | 0.940  |
| P05064 | Aldoa    | 0.039 | 0.132 | 0.022  | -0.139 | 0.000  | -0.265 | -0.709 | -0.415 |
| Q8CGY8 | Ogt      | 0.046 | 0.149 | 0.000  | -0.266 | 0.000  | -0.418 | -0.946 | -0.498 |
| P00920 | Ca2      | 0.051 | 0.158 | 0.887  | 0.000  | -0.365 | -0.645 | -2.020 | -2.740 |
| Q9CRB9 | Chchd3   | 0.005 | 0.039 | -0.052 | 0.233  | 0.000  | 0.868  | 0.646  | 1.000  |
| P63017 | Hspa8    | 0.008 | 0.054 | 0.046  | 0.000  | -0.090 | -0.386 | -0.759 | -0.718 |
| Q9DAM5 | Slc25a19 | 0.512 | 0.776 | 0.000  | 0.235  | -0.215 | 0.146  | 0.162  | -1.530 |
| Q8BG32 | Psm11    | 0.097 | 0.240 | 0.000  | 0.008  | -0.152 | -0.205 | -0.649 | -0.258 |
| Q9Z2U0 | Psm7     | 0.001 | 0.015 | -0.029 | 0.109  | 0.000  | -1.070 | -1.380 | -1.020 |
| Q7M6Y3 | Picalm   | 0.391 | 0.640 | -0.430 | 1.660  | 0.000  | 1.050  | 1.440  | 0.683  |
| Q8BVK9 | Sp110    | 0.142 | 0.309 | -0.296 | 0.000  | 0.048  | -0.447 | -0.417 | -0.158 |
| Q99J39 | Mlycd    | 0.122 | 0.280 | 0.000  | 0.662  | -0.127 | 0.733  | 0.678  | 0.583  |
| A2AN08 | Ubr4     | 0.208 | 0.404 | 0.203  | 0.000  | -0.345 | 0.064  | -0.983 | -0.892 |
| Q9EPK7 | Xpo7     | 0.014 | 0.072 | 0.000  | -0.014 | 0.137  | -0.561 | -1.410 | -1.080 |
| Q9DAW9 | Cnn3     | 0.001 | 0.019 | 1.350  | 0.000  | -0.597 | 6.050  | 5.170  | 5.740  |
| Q9CQ65 | Mtap     | 0.004 | 0.036 | 0.000  | -0.105 | 0.108  | -1.190 | -1.490 | -0.845 |
| Q99LI7 | Cstf3    | 0.246 | 0.457 | -0.352 | 0.110  | 0.000  | -0.471 | -0.629 | -0.048 |
| Q9D0I9 | Rars     | 0.267 | 0.485 | 0.171  | 0.000  | -0.071 | 0.100  | -0.634 | -0.231 |
| P08228 | Sod1     | 0.000 | 0.013 | -0.224 | 0.010  | 0.000  | -1.080 | -1.290 | -1.170 |
| Q99LC5 | Etf1     | 0.310 | 0.542 | 0.000  | 0.213  | -0.198 | 0.705  | -0.164 | 0.467  |
| Q6DIC0 | Smarca2  | 0.021 | 0.090 | 0.000  | 0.161  | -0.064 | -0.474 | -0.802 | -0.336 |
| Q8CFE3 | Rcor1    | 0.012 | 0.068 | 0.000  | -0.039 | 0.014  | -0.534 | -1.040 | -0.568 |
| P61965 | Wdr5     | 0.036 | 0.125 | 0.000  | -0.113 | 0.084  | -0.312 | -0.817 | -0.427 |
| Q9CQQ7 | Atp5f1   | 0.000 | 0.014 | 0.081  | 0.000  | -0.116 | 1.040  | 0.810  | 0.987  |
| Q8R1Q8 | Dync1li1 | 0.384 | 0.633 | 0.000  | -0.009 | 0.173  | 0.263  | -0.011 | 0.215  |
| Q9CQF3 | Nudt21   | 0.017 | 0.080 | 0.226  | 0.000  | -0.079 | -0.412 | -0.346 | -0.277 |
| Q60864 | Stip1    | 0.004 | 0.035 | -0.047 | 0.027  | 0.000  | -0.677 | -1.220 | -1.030 |
| Q8CFI7 | Polr2b   | 0.032 | 0.118 | -0.057 | 0.000  | 0.025  | -0.407 | -0.600 | -0.191 |
| Q8K124 | Plekho2  | 0.967 | 1.000 | 0.080  | -0.182 | 0.000  | 0.317  | -0.430 | -0.020 |
| Q8BH04 | Pck2     | 0.009 | 0.056 | 0.068  | 0.000  | -0.323 | 1.320  | 0.741  | 0.823  |
| Q99PT1 | Arhgdia  | 0.005 | 0.039 | -0.050 | 0.000  | 0.040  | -1.120 | -1.610 | -0.907 |
| Q9JL26 | Fmnl1    | 0.003 | 0.033 | -0.034 | 0.000  | 0.049  | -0.746 | -1.290 | -0.945 |
| Q9Z0V7 | Timm17b  | 0.705 | 0.982 | 0.000  | -0.059 | 0.096  | 0.339  | -0.298 | 0.243  |
| Q9WTQ8 | Timm23   | 0.001 | 0.017 | 0.000  | 0.198  | -0.057 | 0.799  | 0.774  | 0.865  |
| P28352 | Apex1    | 0.028 | 0.107 | 0.000  | -0.288 | 0.047  | -0.452 | -0.881 | -0.582 |
| O88874 | Ccnk     | 0.240 | 0.449 | 0.303  | -0.212 | 0.000  | -1.210 | -0.367 | 0.032  |
| Q8R2E9 | Ero1b    | 0.121 | 0.278 | 0.069  | 0.000  | -0.488 | -0.320 | -0.915 | -0.631 |
| Q80XN0 | Bdh1     | 0.208 | 0.404 | 0.000  | 0.147  | -0.057 | 0.047  | -0.615 | -0.246 |
| Q9CWJ9 | Atic     | 0.007 | 0.048 | 0.044  | -0.094 | 0.000  | -0.791 | -1.580 | -1.370 |
| Q3TEA8 | Hp1bp3   | 0.107 | 0.256 | -0.152 | 0.000  | 0.110  | -0.294 | -0.484 | -0.100 |
| Q61081 | Cdc37    | 0.002 | 0.027 | 0.019  | 0.000  | -0.009 | -0.837 | -1.370 | -1.050 |
| Q61543 | Glg1     | 0.076 | 0.203 | -0.003 | 1.010  | 0.000  | 1.350  | 1.020  | 1.130  |
| P19426 | Nelfe    | 0.017 | 0.081 | -0.074 | 0.000  | 0.154  | -0.345 | -0.656 | -0.356 |
| P27612 | Plaa     | 0.023 | 0.096 | -0.191 | 0.007  | 0.000  | -0.710 | -1.900 | -1.320 |

|        |          |       |       |        |        |        |        |        |        |
|--------|----------|-------|-------|--------|--------|--------|--------|--------|--------|
| Q9CXI5 | Manf     | 0.067 | 0.186 | 0.000  | 0.366  | -0.328 | 0.585  | 0.395  | 0.788  |
| Q3TCN2 | Plbd2    | 0.916 | 1.000 | 0.612  | -0.005 | 0.000  | 0.484  | -0.125 | 0.341  |
| P27546 | Map4     | 0.159 | 0.336 | -0.314 | 0.000  | 0.103  | 0.247  | 0.014  | 0.453  |
| A2AR02 | Ppig     | 0.007 | 0.048 | 0.137  | 0.000  | -0.311 | -0.770 | -1.200 | -1.030 |
| Q9DCH4 | Eif3f    | 0.200 | 0.395 | 0.000  | 0.017  | -0.327 | -0.119 | -0.590 | -0.416 |
| Q61598 | Gdi2     | 0.000 | 0.013 | -0.038 | 0.000  | 0.024  | -0.676 | -0.913 | -0.798 |
| Q8BVI4 | Qdpr     | 0.149 | 0.319 | 0.000  | -0.293 | 0.016  | -0.220 | -0.562 | -0.276 |
| Q9CQ62 | Decr1    | 0.431 | 0.687 | -0.053 | 0.110  | 0.000  | 0.728  | -0.038 | 0.024  |
| P58681 | Tlr7     | 0.683 | 0.960 | 0.829  | -0.061 | 0.000  | 0.779  | 0.114  | 0.332  |
| Q6GV12 | Kdsr     | 0.056 | 0.168 | -1.720 | 0.162  | 0.000  | 0.995  | 0.983  | 1.380  |
| Q8VEK0 | Tmem30a  | 0.141 | 0.308 | 0.264  | 0.000  | -0.064 | 0.477  | 0.148  | 0.337  |
| Q8CDG3 | Vcpip1   | 0.072 | 0.197 | -0.095 | 0.062  | 0.000  | -0.188 | -1.310 | -0.985 |
| P62754 | Rps6     | 0.169 | 0.350 | 0.062  | -0.038 | 0.000  | 0.478  | -0.019 | 0.316  |
| Q8VBZ3 | Cipltm1  | 0.007 | 0.050 | 0.000  | 0.091  | -0.179 | 0.984  | 0.517  | 0.882  |
| Q8VDM6 | Hnrnpul1 | 0.168 | 0.350 | 0.000  | 0.612  | -0.432 | -0.761 | -0.381 | -0.344 |
| Q569Z5 | Ddx46    | 0.021 | 0.092 | 0.180  | -0.247 | 0.000  | -0.684 | -1.790 | -1.560 |
| O35286 | Dhx15    | 0.013 | 0.071 | -0.082 | 0.000  | 0.065  | -0.392 | -0.774 | -0.454 |
| Q9JM14 | Nt5c     | 0.002 | 0.023 | -0.329 | 0.393  | 0.000  | -1.550 | -1.680 | -1.570 |
| O08539 | Bin1     | 0.015 | 0.076 | -0.300 | 0.232  | 0.000  | -0.726 | -1.520 | -1.220 |
| Q9WV85 | Nme3     | 0.093 | 0.234 | 0.001  | -0.129 | 0.000  | -0.343 | -0.578 | -0.122 |
| Q91YW3 | Dnajc3   | 0.001 | 0.022 | 0.000  | 0.021  | -0.207 | 1.010  | 0.731  | 0.763  |
| Q9CT10 | Ranbp3   | 0.004 | 0.038 | -0.211 | 0.000  | 0.146  | -1.020 | -1.690 | -1.230 |
| Q8K1B8 | Fermt3   | 0.253 | 0.466 | 0.000  | 0.165  | -0.366 | -0.172 | -0.300 | -0.423 |
| P47962 | Rpl5     | 0.228 | 0.432 | 0.125  | -0.082 | 0.000  | 0.097  | -0.370 | -0.689 |
| Q9Z1G4 | Atp6v0a1 | 0.225 | 0.427 | 0.713  | -0.329 | 0.000  | 2.070  | -0.094 | 1.480  |
| Q9EQK5 | Mvp      | 0.055 | 0.166 | -0.217 | 0.000  | 0.037  | 0.473  | 0.098  | 0.340  |
| Q99J99 | Mpst     | 0.334 | 0.571 | 0.163  | 0.000  | -0.160 | 0.378  | -0.932 | -0.891 |
| Q9D967 | Mdp1     | 0.009 | 0.057 | -0.283 | 0.000  | 0.020  | -2.080 | -3.970 | -2.490 |
| O88487 | Dync1i2  | 0.412 | 0.665 | 0.000  | 0.172  | -0.041 | 0.321  | -0.021 | 0.156  |
| Q8C129 | Lnpep    | 0.689 | 0.965 | 0.030  | 0.000  | -0.056 | 0.124  | -0.155 | 0.131  |
| Q3UQ84 | Tars2    | 0.008 | 0.053 | 0.000  | 0.010  | -0.095 | 0.543  | 0.329  | 0.293  |
| Q8CD10 | Micu2    | 0.000 | 0.014 | -0.023 | 0.080  | 0.000  | 1.030  | 0.770  | 0.952  |
| P61290 | Psme3    | 0.001 | 0.021 | 0.000  | 0.420  | -0.049 | -1.120 | -1.150 | -1.340 |
| Q8JZN5 | Acad9    | 0.215 | 0.412 | 0.000  | 0.153  | -0.210 | 0.571  | 0.123  | 0.083  |
| Q8CJF7 | Ahctf1   | 0.969 | 1.000 | -0.733 | 0.000  | 0.004  | -0.494 | -0.354 | 0.158  |
| P35293 | Rab18    | 0.022 | 0.093 | 0.000  | 0.058  | -0.235 | 0.574  | 0.244  | 0.439  |
| Q9JLI8 | Sart3    | 0.010 | 0.058 | 0.000  | 0.228  | -0.111 | -0.934 | -1.600 | -0.875 |
| Q08288 | Lyar     | 0.211 | 0.408 | 0.005  | 0.000  | -0.310 | -0.096 | -0.931 | -0.453 |
| P53994 | Rab2a    | 0.195 | 0.387 | 0.000  | 0.207  | -0.108 | 0.262  | 0.082  | 0.656  |
| P62774 | Mtpn     | 0.005 | 0.041 | 0.000  | -0.056 | 0.340  | -0.915 | -1.670 | -1.290 |
| Q7TQI3 | Otub1    | 0.007 | 0.048 | 0.000  | -0.084 | 0.037  | -0.752 | -1.500 | -1.260 |
| P58252 | Eef2     | 0.192 | 0.384 | 0.070  | 0.000  | -0.273 | -0.046 | -0.716 | -0.492 |
| Q91V61 | Sfxn3    | 0.006 | 0.043 | -0.166 | 0.192  | 0.000  | 0.721  | 0.546  | 0.762  |
| Q68FD5 | Cltc     | 0.377 | 0.625 | 0.000  | 0.035  | -0.230 | 0.063  | -0.437 | -0.339 |
| P68510 | Ywhah    | 0.001 | 0.015 | -0.038 | 0.020  | 0.000  | -0.755 | -1.060 | -0.878 |
| Q91WD5 | Ndufs2   | 0.006 | 0.045 | 0.000  | 0.406  | -0.118 | 0.946  | 0.914  | 1.040  |
| P27773 | Pdia3    | 0.006 | 0.047 | 0.000  | 0.162  | -0.091 | 0.836  | 0.494  | 0.787  |
| Q9R0E2 | Plod1    | 0.000 | 0.010 | 0.686  | -0.258 | 0.000  | 4.510  | 4.250  | 4.540  |
| Q9JI11 | Stk4     | 0.009 | 0.057 | 0.000  | -0.122 | 0.047  | -0.744 | -1.550 | -1.450 |
| A2BH40 | Arid1a   | 0.092 | 0.233 | -0.206 | 0.044  | 0.000  | -0.488 | -0.528 | -0.129 |
| Q9ERR7 | Sep 15   | 0.054 | 0.164 | 0.000  | 0.000  | 0.112  | 0.582  | 0.658  | 0.160  |
| Q8BKZ9 | Pdhx     | 0.019 | 0.086 | 0.000  | 0.072  | -0.571 | 0.880  | 0.548  | 0.654  |
| P00405 | Mtco2    | 0.007 | 0.048 | 0.000  | 0.129  | -0.089 | 0.646  | 0.391  | 0.643  |
| Q3UVK0 | Ermp1    | 0.187 | 0.376 | 0.000  | 0.130  | -0.198 | 0.330  | -0.022 | 0.382  |
| Q8BL66 | Eea1     | 0.108 | 0.259 | -0.525 | 0.502  | 0.000  | -0.939 | -0.986 | -0.339 |
| P40336 | Vps26a   | 0.557 | 0.825 | 0.032  | 0.000  | -0.325 | 0.061  | -0.478 | -0.248 |
| O08795 | Prkcsh   | 0.006 | 0.047 | 0.000  | 0.339  | -0.092 | 0.821  | 0.722  | 0.867  |
| Q9WVK4 | Ehd1     | 0.325 | 0.561 | 0.320  | 0.000  | -0.219 | 0.523  | 0.037  | 0.249  |
| Q8VCF0 | Mavs     | 0.900 | 1.000 | -0.276 | 0.000  | 0.068  | -0.034 | -0.283 | 0.051  |

|        |          |       |       |        |        |        |        |        |        |
|--------|----------|-------|-------|--------|--------|--------|--------|--------|--------|
| P62301 | Rps13    | 0.889 | 1.000 | 0.000  | 0.263  | -0.044 | -0.105 | 0.013  | 0.390  |
| O08917 | Flot1    | 0.054 | 0.164 | 0.190  | -0.046 | 0.000  | 0.567  | 0.218  | 0.752  |
| Q9D898 | Arpc5l   | 0.171 | 0.353 | -0.177 | 0.054  | 0.000  | 0.015  | 0.105  | 0.281  |
| A2AJI0 | Map7d1   | 0.249 | 0.462 | -0.128 | 0.647  | 0.000  | 1.090  | 0.041  | 1.120  |
| Q9JMA1 | Usp14    | 0.074 | 0.201 | 0.000  | 0.381  | -0.373 | -0.303 | -0.956 | -1.110 |
| Q60930 | Vdac2    | 0.002 | 0.023 | 0.000  | 0.161  | -0.063 | 1.040  | 0.946  | 1.360  |
| P62900 | Rpl31    | 0.502 | 0.767 | 0.126  | -0.033 | 0.000  | 0.385  | -0.004 | 0.012  |
| F8VPU2 | Farp1    | 0.001 | 0.014 | -0.677 | 0.000  | 0.355  | 4.280  | 3.500  | 3.700  |
| Q9JMG7 | Hdgfrp3  | 0.136 | 0.301 | -0.347 | 0.000  | 0.147  | -0.879 | -0.986 | -0.099 |
| Q922L6 | Nelfcd   | 0.012 | 0.066 | 0.000  | -0.045 | 0.091  | -0.415 | -0.543 | -0.247 |
| Q52KI8 | Srrm1    | 0.120 | 0.276 | 0.238  | -0.450 | 0.000  | -0.234 | -2.830 | -1.770 |
| Q8BG81 | Poldip3  | 0.098 | 0.242 | -0.525 | 0.000  | 0.195  | -0.771 | -0.787 | -0.391 |
| Q921Z5 | Tnfaip8  | 0.082 | 0.214 | 0.388  | 0.000  | -0.292 | -0.278 | -0.792 | -0.547 |
| Q3UJU9 | Rmdn3    | 0.332 | 0.570 | 0.215  | 0.000  | -0.020 | -0.077 | -0.868 | 0.115  |
| Q8CB44 | Gramd4   | 0.430 | 0.686 | 0.000  | 0.225  | -0.025 | 0.064  | 0.109  | 0.327  |
| Q922K7 | Nop2     | 0.086 | 0.223 | 0.000  | 0.003  | -0.303 | -0.235 | -0.800 | -0.577 |
| P49717 | Mcm4     | 0.023 | 0.097 | 0.346  | 0.000  | -0.046 | -0.328 | -0.924 | -0.787 |
| Q3UHX2 | Pdap1    | 0.179 | 0.365 | 0.000  | 0.188  | -0.220 | -0.300 | -0.993 | -0.140 |
| Q9R1P1 | Psmb3    | 0.004 | 0.035 | 0.033  | -0.340 | 0.000  | -1.020 | -1.120 | -0.826 |
| Q61941 | Nnt      | 0.000 | 0.013 | 1.030  | -0.638 | 0.000  | 5.910  | 5.440  | 5.700  |
| P52293 | Kpna2    | 0.813 | 1.000 | 0.707  | 0.000  | -0.101 | 0.887  | -0.132 | 0.151  |
| Q05512 | Mark2    | 0.392 | 0.641 | 0.223  | -0.177 | 0.000  | 0.293  | -0.698 | -0.474 |
| Q5XJY5 | Arcn1    | 0.085 | 0.221 | 0.106  | -0.155 | 0.000  | -0.126 | -0.943 | -0.727 |
| Q99JR8 | Smarcd2  | 0.103 | 0.250 | 0.000  | -0.058 | 0.257  | -0.113 | -0.328 | -0.116 |
| Q9D0T1 | Snu13    | 0.001 | 0.016 | 0.000  | 0.041  | -0.075 | -0.503 | -0.523 | -0.409 |
| Q8BFZ9 | Erlin2   | 0.006 | 0.047 | 0.000  | 0.127  | -0.748 | 1.380  | 1.200  | 1.190  |
| Q9D0S9 | Hint2    | 0.816 | 1.000 | 0.000  | 1.130  | -1.100 | -0.268 | 1.220  | -0.316 |
| P21107 | Tpm3     | 0.005 | 0.039 | 0.000  | 0.179  | -0.001 | -0.958 | -1.660 | -1.080 |
| Q921S7 | Mrpl37   | 0.249 | 0.462 | 0.174  | 0.000  | -0.144 | 0.783  | -0.030 | 0.302  |
| Q3V3R1 | Mthfd1l  | 0.570 | 0.839 | 0.201  | 0.000  | -0.215 | 0.497  | -0.751 | -0.501 |
| Q91VW3 | Sh3bgrl3 | 0.003 | 0.033 | -0.165 | 0.000  | 0.130  | -1.470 | -2.560 | -2.250 |
| E9Q555 | Rnf213   | 0.959 | 1.000 | 0.447  | 0.000  | -0.205 | 0.553  | -0.424 | 0.057  |
| Q8K411 | Pitrm1   | 0.003 | 0.030 | 0.219  | 0.000  | -0.224 | 1.320  | 0.923  | 1.190  |
| Q9D1L0 | Chchd2   | 0.596 | 0.869 | -0.345 | 0.000  | 0.075  | 0.112  | -1.140 | 0.029  |
| Q9QYR9 | Acot2    | 0.001 | 0.018 | -0.148 | 0.041  | 0.000  | 0.854  | 0.676  | 0.934  |
| P16858 | Gapdh    | 0.043 | 0.142 | -0.051 | 0.026  | 0.000  | -0.153 | -0.557 | -0.357 |
| P61222 | Abce1    | 0.300 | 0.529 | 0.517  | -0.034 | 0.000  | 0.313  | -0.505 | -0.467 |
| P61161 | Actr2    | 0.282 | 0.505 | 0.071  | -0.134 | 0.000  | 0.212  | -0.043 | 0.126  |
| Q8VCH8 | Ubxn4    | 0.013 | 0.069 | 0.099  | 0.000  | -0.026 | 0.633  | 0.446  | 0.951  |
| O55023 | Impa1    | 0.000 | 0.013 | -0.248 | 0.000  | 0.009  | -1.540 | -1.950 | -1.710 |
| P70248 | Myo1f    | 0.137 | 0.302 | 0.249  | -0.171 | 0.000  | -0.054 | -0.811 | -0.449 |
| Q9JHW2 | Nit2     | 0.309 | 0.542 | -0.141 | 0.431  | 0.000  | 0.296  | 0.245  | 0.362  |
| Q9JHW4 | Eefsec   | 0.087 | 0.224 | 0.249  | -0.072 | 0.000  | -0.272 | -1.360 | -0.515 |
| O88736 | Hsd17b7  | 0.000 | 0.004 | 0.000  | 0.367  | -0.023 | 4.050  | 3.850  | 4.130  |
| P57759 | Erp29    | 0.022 | 0.094 | 0.000  | 0.074  | -0.443 | 0.673  | 0.369  | 0.667  |
| O35654 | Pold2    | 0.012 | 0.068 | -0.024 | 0.000  | 0.141  | -0.399 | -0.668 | -0.328 |
| Q62419 | Sh3gl1   | 0.450 | 0.708 | 0.000  | -0.110 | 0.019  | 0.287  | -0.209 | 0.241  |
| P61082 | Ube2m    | 0.204 | 0.400 | 0.058  | -0.064 | 0.000  | 0.007  | -0.882 | -0.322 |
| Q8K1E0 | Stx5     | 0.141 | 0.307 | 0.053  | -0.343 | 0.000  | 0.073  | 0.123  | 0.426  |
| Q60715 | P4ha1    | 0.000 | 0.008 | 0.000  | 0.805  | -0.211 | 6.380  | 6.030  | 6.340  |
| Q9D8Y0 | Efhd2    | 0.003 | 0.033 | 0.045  | 0.000  | -0.014 | -0.957 | -1.570 | -1.060 |
| Q9R0P5 | Dstn     | 0.888 | 1.000 | 0.713  | 0.000  | -1.130 | 0.571  | -0.381 | -0.332 |
| Q9QYC7 | Ggcx     | 0.000 | 0.003 | -0.235 | 0.000  | 0.166  | 5.000  | 4.810  | 5.100  |
| Q6ZWX6 | Eif2s1   | 0.438 | 0.695 | 0.263  | 0.000  | -0.164 | 0.248  | -0.476 | -0.325 |
| Q9DB20 | Atp5o    | 0.001 | 0.019 | 0.000  | 0.129  | -0.067 | 0.904  | 0.673  | 0.901  |
| Q8BR65 | Suds3    | 0.139 | 0.304 | 0.057  | 0.000  | -0.089 | -0.026 | -0.482 | -0.292 |
| Q9QZ88 | Vps29    | 0.132 | 0.296 | 0.190  | -0.256 | 0.000  | -0.377 | -1.590 | -0.445 |
| O08709 | Prdx6    | 0.003 | 0.031 | 0.085  | 0.000  | -0.156 | -1.090 | -1.810 | -1.670 |
| Q9CQ22 | Lamtor1  | 0.492 | 0.756 | 0.000  | -0.355 | 0.051  | 0.095  | -0.158 | 0.109  |

|        |          |       |       |        |        |        |        |        |        |
|--------|----------|-------|-------|--------|--------|--------|--------|--------|--------|
| Q8BIJ6 | lars2    | 0.008 | 0.053 | 0.000  | 0.073  | -0.104 | 0.819  | 0.408  | 0.655  |
| Q8CIN4 | Pak2     | 0.001 | 0.022 | -0.049 | 0.000  | 0.006  | -1.000 | -1.520 | -1.160 |
| Q9CZW4 | Acsl3    | 0.001 | 0.022 | 0.554  | -0.639 | 0.000  | 3.110  | 2.640  | 3.120  |
| Q61739 | Itga6    | 0.274 | 0.495 | 0.000  | 0.607  | -0.319 | -0.246 | -0.143 | -0.388 |
| Q8K2Z4 | Ncapd2   | 0.437 | 0.694 | 0.059  | -0.356 | 0.000  | 0.217  | -0.607 | -0.761 |
| Q91YQ5 | Rpn1     | 0.001 | 0.018 | 0.000  | 0.016  | -0.293 | 1.400  | 1.040  | 1.180  |
| Q9DC61 | Pmpca    | 0.012 | 0.068 | 0.000  | 0.351  | -0.158 | 1.180  | 0.802  | 0.788  |
| Q3UJB9 | Ecd4     | 0.867 | 1.000 | 0.128  | -0.076 | 0.000  | 0.309  | -0.341 | -0.021 |
| P18242 | Ctsd     | 0.694 | 0.969 | 0.717  | 0.000  | -0.835 | 0.208  | -0.516 | -0.451 |
| Q99L13 | Hibadh   | 0.000 | 0.014 | 0.000  | 0.215  | -0.163 | 1.320  | 1.240  | 1.450  |
| Q03265 | Atp5a1   | 0.002 | 0.025 | 0.000  | 0.050  | -0.113 | 0.804  | 0.540  | 0.809  |
| Q9QXX4 | Slc25a13 | 0.004 | 0.038 | -0.014 | 0.047  | 0.000  | 0.518  | 0.393  | 0.699  |
| O54879 | Hmgb3    | 0.121 | 0.278 | 0.188  | -0.126 | 0.000  | -0.298 | -0.889 | -0.166 |
| Q9QY06 | Myo9b    | 0.117 | 0.273 | 0.000  | -0.054 | 0.168  | 0.018  | -0.602 | -0.651 |
| Q9Z1F9 | Uba2     | 0.005 | 0.042 | 0.000  | -0.064 | 0.102  | -1.020 | -1.890 | -1.320 |
| P62855 | Rps26    | 0.563 | 0.832 | 0.024  | -0.672 | 0.000  | 0.355  | -0.968 | -0.977 |
| P63005 | Pafah1b1 | 0.015 | 0.075 | 0.000  | 0.142  | -0.104 | -0.432 | -0.897 | -0.558 |
| Q6PGG2 | Gmip     | 0.008 | 0.055 | 0.062  | 0.000  | -0.212 | -1.290 | -1.810 | -0.933 |
| O35855 | Bcat2    | 0.331 | 0.569 | 0.049  | 0.000  | -0.484 | 0.516  | -0.134 | 0.039  |
| P29351 | Ptpn6    | 0.095 | 0.238 | 0.228  | -0.143 | 0.000  | -0.147 | -0.756 | -0.370 |
| Q8BPG6 | Sumf2    | 0.000 | 0.013 | -0.094 | 0.054  | 0.000  | 0.610  | 0.632  | 0.744  |
| Q9CQC7 | Ndufb4   | 0.005 | 0.039 | 0.000  | 0.250  | -0.034 | 0.719  | 0.760  | 0.569  |
| Q99KH8 | Stk24    | 0.035 | 0.123 | -0.121 | 0.133  | 0.000  | -0.235 | -0.505 | -0.703 |
| Q9Z2N8 | Actl6a   | 0.006 | 0.047 | -0.016 | 0.057  | 0.000  | -0.380 | -0.667 | -0.402 |
| Q91ZV0 | Mia2     | 0.257 | 0.472 | -0.554 | 0.166  | 0.000  | 0.561  | -0.135 | 0.378  |
| Q8CGK3 | Lonp1    | 0.159 | 0.335 | 0.242  | 0.000  | -0.158 | 1.280  | 0.204  | 0.415  |
| Q8C4J7 | Tbl3     | 0.049 | 0.154 | 0.189  | 0.000  | -0.100 | -0.174 | -0.628 | -0.759 |
| Q8VEM8 | Slc25a3  | 0.001 | 0.019 | 0.000  | 0.026  | -0.130 | 1.170  | 0.803  | 0.950  |
| P60762 | Morf4l1  | 0.009 | 0.057 | -0.318 | 0.087  | 0.000  | -0.962 | -0.761 | -0.658 |
| Q9D8U8 | Snx5     | 0.176 | 0.360 | 0.255  | 0.000  | -0.005 | 0.060  | -0.518 | -0.216 |
| Q9Z2U1 | Psma5    | 0.001 | 0.018 | -0.148 | 0.000  | 0.027  | -0.997 | -1.330 | -1.400 |
| P27641 | Xrcc5    | 0.003 | 0.030 | -0.102 | 0.000  | 0.052  | -1.050 | -1.770 | -1.530 |
| Q80UU9 | Pgrmc2   | 0.036 | 0.125 | 0.101  | -1.420 | 0.000  | 1.290  | 0.890  | 1.240  |
| Q9D051 | Pdhb     | 0.332 | 0.570 | 0.000  | 0.004  | -0.255 | 0.792  | -0.134 | 0.064  |
| P47758 | Srprb    | 0.009 | 0.057 | -0.191 | 0.223  | 0.000  | 0.773  | 0.554  | 0.890  |
| Q9CYR0 | Ssbp1    | 0.351 | 0.592 | 0.000  | 0.078  | 0.000  | 0.385  | -0.069 | 0.185  |
| Q91ZX7 | Lrp1     | 0.002 | 0.025 | 0.234  | 0.000  | -1.060 | 2.740  | 2.500  | 2.710  |
| Q9D1P4 | Chordc1  | 0.031 | 0.116 | 0.000  | -0.375 | 0.231  | -0.843 | -1.750 | -0.898 |
| Q8VCB1 | Ndc1     | 0.083 | 0.216 | -0.054 | 0.125  | 0.000  | 0.620  | 0.106  | 0.452  |
| P62889 | Rpl30    | 0.194 | 0.386 | 0.236  | -0.137 | 0.000  | 0.653  | 0.049  | 0.359  |
| Q64521 | Gpd2     | 0.010 | 0.061 | 0.000  | 0.125  | -0.395 | 0.903  | 0.600  | 0.693  |
| O70152 | Dpm1     | 0.009 | 0.058 | -0.055 | 0.148  | 0.000  | 0.621  | 0.542  | 0.972  |
| Q64727 | Vcl      | 0.889 | 1.000 | 0.423  | 0.000  | -0.698 | 0.350  | -0.352 | -0.100 |
| Q61792 | Lasp1    | 0.591 | 0.864 | -0.323 | 0.046  | 0.000  | 0.162  | -0.267 | 0.147  |
| O88532 | Zfr      | 0.756 | 1.000 | -0.374 | 0.000  | 0.242  | -0.033 | -0.343 | 0.030  |
| Q64012 | Raly     | 0.019 | 0.086 | 0.000  | 0.086  | -0.035 | -0.193 | -0.356 | -0.175 |
| Q9EPE9 | Atp13a1  | 0.000 | 0.013 | 0.082  | 0.000  | -0.043 | 0.982  | 1.020  | 1.240  |
| Q08093 | Cnn2     | 0.711 | 0.987 | -0.069 | 0.221  | 0.000  | 0.526  | -0.210 | 0.112  |
| Q9Z0X1 | Aifm1    | 0.917 | 1.000 | 0.000  | 0.036  | -0.025 | 0.160  | -0.134 | 0.015  |
| Q8K297 | Colgalt1 | 0.000 | 0.013 | 0.020  | 0.000  | -0.798 | 3.140  | 2.810  | 2.900  |
| P27601 | Gna13    | 0.966 | 1.000 | -0.229 | 0.139  | 0.000  | 0.035  | -0.168 | 0.062  |
| P68372 | Tubb4b   | 0.036 | 0.125 | 0.000  | 0.073  | -0.162 | -0.272 | -0.840 | -0.694 |
| Q01853 | Vcp      | 0.002 | 0.025 | 0.000  | 0.056  | -0.134 | -0.465 | -0.616 | -0.590 |
| Q8K1R3 | Pnpt1    | 0.333 | 0.571 | 0.128  | 0.000  | -0.456 | 1.050  | 0.609  | -0.428 |
| Q6NS46 | Pdcd11   | 0.115 | 0.270 | 0.288  | 0.000  | -0.052 | 0.029  | -0.613 | -0.698 |
| Q91V92 | Acly     | 0.836 | 1.000 | 0.521  | 0.000  | -0.217 | 0.528  | -0.126 | 0.096  |
| Q61687 | Atrx     | 0.020 | 0.089 | -0.063 | 0.030  | 0.000  | -0.511 | -1.080 | -0.541 |
| O35887 | Calu     | 0.000 | 0.010 | 0.000  | 0.381  | -0.028 | 2.430  | 2.320  | 2.650  |
| Q8VBV7 | Cops8    | 0.011 | 0.063 | -0.099 | 0.297  | 0.000  | -0.536 | -0.993 | -1.100 |

|        |          |       |       |        |        |        |        |        |        |
|--------|----------|-------|-------|--------|--------|--------|--------|--------|--------|
| Q9D892 | Itpa     | 0.015 | 0.075 | 0.000  | 0.571  | -0.294 | -0.901 | -1.130 | -1.500 |
| P32067 | Ssb      | 0.024 | 0.099 | 0.085  | 0.000  | -0.109 | -0.360 | -1.020 | -0.784 |
| Q8BI72 | Cdkn2aip | 0.009 | 0.058 | -0.178 | 0.025  | 0.000  | -0.523 | -0.712 | -0.421 |
| P97372 | Psme2    | 0.004 | 0.035 | -0.129 | 0.542  | 0.000  | -1.040 | -1.290 | -1.300 |
| Q9WUM5 | Suclg1   | 0.579 | 0.850 | 0.279  | 0.000  | -0.064 | 1.160  | -0.031 | -0.140 |
| P97452 | Bop1     | 0.146 | 0.315 | 0.031  | 0.000  | -0.439 | -0.274 | -0.489 | -0.693 |
| Q6WVG3 | Kctd12   | 0.656 | 0.932 | 0.315  | 0.000  | -0.034 | 0.280  | -0.225 | -0.040 |
| Q9CXW3 | Cacybp   | 0.796 | 1.000 | 0.000  | 0.321  | -0.259 | 0.140  | -0.448 | 0.154  |
| Q8C7V8 | Ccdc134  | 0.086 | 0.222 | 0.343  | -0.195 | 0.000  | 1.030  | 0.218  | 1.050  |
| Q9EPU0 | Upf1     | 0.254 | 0.467 | 0.070  | 0.000  | -0.442 | -0.174 | -0.567 | -0.419 |
| Q8K2B3 | Sdha     | 0.017 | 0.081 | 0.000  | 0.002  | -0.204 | 0.722  | 0.297  | 0.454  |
| P67778 | Phb      | 0.003 | 0.033 | 0.000  | 0.017  | -0.309 | 0.843  | 0.579  | 0.735  |
| Q6NZJ6 | Eif4g1   | 0.192 | 0.384 | 0.001  | -0.411 | 0.000  | 0.581  | -0.101 | 0.237  |
| P35235 | Ptpn11   | 0.002 | 0.029 | -0.286 | 0.010  | 0.000  | -0.906 | -1.190 | -0.916 |
| Q922Q4 | Pycr2    | 0.016 | 0.078 | 0.102  | 0.000  | -0.106 | 1.190  | 0.520  | 0.764  |
| P47753 | Capza1   | 0.230 | 0.435 | -0.227 | 0.804  | 0.000  | -0.433 | -0.018 | -0.420 |
| Q61102 | Abcb7    | 0.585 | 0.857 | -0.410 | 0.169  | 0.000  | 0.145  | -0.268 | 0.316  |
| P47802 | Mtx1     | 0.295 | 0.522 | 0.000  | 0.014  | -0.282 | 0.283  | -0.076 | 0.042  |
| P03958 | Ada      | 0.014 | 0.072 | 0.754  | -0.343 | 0.000  | -1.270 | -2.090 | -1.410 |
| P63321 | Rala     | 0.001 | 0.019 | 0.000  | 0.267  | -0.010 | 1.050  | 1.270  | 1.390  |
| P27808 | Mgat1    | 0.011 | 0.063 | 0.341  | -0.109 | 0.000  | 1.110  | 0.673  | 1.070  |
| Q91V08 | Clec2d   | 0.595 | 0.868 | 0.000  | 4.180  | -0.694 | -1.230 | 2.370  | -0.961 |
| P21279 | Gnaq     | 0.001 | 0.019 | 0.000  | 0.266  | -0.175 | 1.290  | 1.150  | 1.370  |
| Q3TWW8 | Srsf6    | 0.078 | 0.209 | 0.100  | 0.000  | -0.133 | -0.141 | -1.130 | -1.060 |
| Q80WQ2 | Vac14    | 0.093 | 0.234 | 0.126  | 0.000  | -0.005 | -0.024 | -0.634 | -0.440 |
| P19157 | Gstp1    | 0.004 | 0.036 | -0.138 | 0.000  | 0.106  | -1.050 | -1.380 | -0.809 |
| Q99JF8 | Psip1    | 0.090 | 0.230 | -0.095 | 0.000  | 0.152  | -0.474 | -0.546 | -0.054 |
| Q9EPU4 | Cpsf1    | 0.146 | 0.315 | 0.000  | 0.097  | -0.063 | -0.601 | -0.441 | 0.028  |
| P61028 | Rab8b    | 0.484 | 0.747 | 0.000  | 0.106  | -1.460 | -0.015 | -0.228 | 0.075  |
| Q9EQH2 | Erap1    | 0.628 | 0.904 | -0.026 | 0.272  | 0.000  | 0.049  | -0.104 | 0.119  |
| P63276 | Rps17    | 0.251 | 0.463 | 0.554  | -0.143 | 0.000  | 0.393  | 0.274  | 1.260  |
| P08249 | Mdh2     | 0.023 | 0.096 | -0.067 | 0.250  | 0.000  | 0.700  | 0.373  | 0.737  |
| Q8C0E2 | Vps26b   | 0.098 | 0.242 | 0.000  | -0.173 | 0.155  | -0.331 | -1.450 | -0.538 |
| P06537 | Nr3c1    | 0.043 | 0.141 | -0.291 | 0.000  | 0.306  | -0.491 | -0.996 | -0.556 |
| P84096 | Rhog     | 0.210 | 0.406 | 0.099  | -0.086 | 0.000  | -0.027 | -0.680 | -0.190 |
| Q8K273 | Mmgt1    | 0.040 | 0.135 | 0.123  | -0.229 | 0.000  | 1.120  | 0.385  | 1.530  |
| Q6P5D8 | Smchd1   | 0.071 | 0.194 | -0.012 | 0.080  | 0.000  | -0.246 | -0.640 | -0.156 |
| Q99KC8 | Vwa5a    | 0.041 | 0.136 | -0.167 | 0.112  | 0.000  | 0.212  | 0.207  | 0.290  |
| Q6A0A9 | FAM120A  | 0.722 | 1.000 | -0.005 | 0.168  | 0.000  | 0.747  | -0.800 | -0.310 |
| P26231 | Ctnna1   | 0.001 | 0.018 | 0.052  | -0.640 | 0.000  | 3.370  | 2.460  | 2.860  |
| Q6ZPE2 | Sbf1     | 0.006 | 0.044 | 0.052  | -0.183 | 0.000  | -0.773 | -1.370 | -1.020 |
| Q9Z1K5 | Arih1    | 0.021 | 0.092 | 0.126  | -0.138 | 0.000  | -0.818 | -2.130 | -1.350 |
| Q3UUQ7 | Pgap1    | 0.013 | 0.072 | 0.463  | -0.528 | 0.000  | 1.170  | 1.170  | 1.220  |
| P42125 | Eci1     | 0.192 | 0.384 | 0.000  | 0.429  | -0.075 | 0.361  | 0.416  | 0.326  |
| Q8C9B9 | Dido1    | 0.033 | 0.120 | -0.193 | 0.041  | 0.000  | 0.473  | 0.154  | 0.515  |
| Q80U72 | Scrib    | 0.649 | 0.926 | -0.386 | 0.062  | 0.000  | 1.500  | -0.647 | -0.191 |
| O35143 | Atpif1   | 0.013 | 0.069 | 0.259  | 0.000  | -0.321 | 1.590  | 1.150  | 0.813  |
| Q8K310 | Matr3    | 0.033 | 0.119 | -0.160 | 0.000  | 0.057  | -0.247 | -0.430 | -0.265 |
| Q8BXZ1 | Tmx3     | 0.000 | 0.008 | -0.015 | 0.000  | 0.010  | 0.683  | 0.570  | 0.683  |
| Q9JIT0 | Rcl1     | 0.006 | 0.044 | -0.094 | 0.000  | 0.033  | -0.925 | -1.080 | -1.640 |
| P35278 | Rab5c    | 0.471 | 0.730 | -0.070 | 0.126  | 0.000  | 0.187  | -0.097 | 0.261  |
| Q91VR5 | Ddx1     | 0.525 | 0.791 | 0.054  | 0.000  | -0.008 | 0.345  | -0.164 | 0.182  |
| P84084 | Arf5     | 0.092 | 0.233 | 0.000  | 0.100  | -0.067 | -0.116 | -1.250 | -0.806 |
| P14685 | Psmc3    | 0.048 | 0.152 | 0.000  | -0.102 | 0.036  | -0.240 | -0.752 | -0.399 |
| P80315 | Cct4     | 0.030 | 0.114 | -0.089 | 0.028  | 0.000  | -0.246 | -0.738 | -0.523 |
| Q7TPD0 | Ints3    | 0.037 | 0.128 | 0.000  | -0.118 | 0.448  | -0.365 | -1.040 | -0.669 |
| O88531 | Ppt1     | 0.102 | 0.248 | 0.288  | 0.000  | -0.559 | -0.350 | -1.070 | -1.500 |
| Q921M3 | Sf3b3    | 0.003 | 0.031 | -0.017 | 0.117  | 0.000  | -0.436 | -0.637 | -0.422 |
| Q8VH51 | Rbm39    | 0.044 | 0.143 | 0.079  | 0.000  | -0.126 | -0.211 | -0.764 | -0.586 |

|        |         |       |       |        |        |        |        |        |        |
|--------|---------|-------|-------|--------|--------|--------|--------|--------|--------|
| Q8BHN3 | Ganab   | 0.006 | 0.047 | 0.180  | 0.000  | -0.140 | 0.719  | 0.487  | 0.700  |
| Q9CZW5 | Tomm70  | 0.062 | 0.179 | 0.000  | 0.008  | -0.151 | 0.239  | 0.035  | 0.226  |
| O35972 | Mrpl23  | 0.003 | 0.033 | 0.000  | 0.107  | -0.240 | 0.886  | 0.665  | 0.669  |
| P62315 | Snrpd1  | 0.645 | 0.922 | 0.000  | -1.410 | 0.030  | -0.557 | -0.619 | 0.778  |
| O35350 | Capn1   | 0.018 | 0.084 | -0.014 | 0.000  | 0.021  | -0.236 | -0.579 | -0.351 |
| Q60737 | Csnk2a1 | 0.841 | 1.000 | 0.000  | 0.031  | -0.134 | -0.077 | -0.483 | 0.308  |
| P97376 | Frg1    | 0.010 | 0.059 | 0.020  | -0.044 | 0.000  | -0.541 | -0.851 | -0.422 |
| P68037 | Ube2l3  | 0.133 | 0.297 | 0.000  | 0.339  | -0.029 | -0.282 | -1.350 | -0.224 |
| P54103 | Dnajc2  | 0.094 | 0.236 | 0.144  | 0.000  | 0.000  | -0.125 | -0.980 | -0.423 |
| O08915 | Aip     | 0.025 | 0.102 | 0.016  | -0.067 | 0.000  | -0.672 | -1.950 | -1.290 |
| O35841 | Api5    | 0.032 | 0.116 | -0.044 | 0.000  | 0.040  | -0.768 | -0.726 | -0.225 |
| Q8CHP6 | Phc3    | 0.947 | 1.000 | -0.400 | 0.000  | 0.610  | 0.040  | 0.081  | 0.027  |
| Q8K284 | Gtf3c1  | 0.105 | 0.252 | 0.000  | 0.163  | -0.024 | -0.119 | -1.060 | -0.453 |
| Q09014 | Ncf1    | 0.407 | 0.658 | 1.740  | -0.022 | 0.000  | 1.230  | -1.690 | -0.706 |
| P81269 | Atf1    | 0.311 | 0.544 | 0.000  | -2.120 | 0.502  | 0.421  | -0.113 | 1.130  |
| O35343 | Kpna4   | 0.217 | 0.415 | 0.000  | 0.365  | -0.431 | -1.080 | -0.695 | -0.005 |
| Q9CSU0 | Rprd1b  | 0.000 | 0.009 | -0.009 | 0.058  | 0.000  | -0.946 | -1.160 | -1.000 |
| Q3UQ44 | lqgap2  | 0.285 | 0.509 | 0.213  | 0.000  | -0.073 | 0.235  | -0.465 | -0.837 |
| Q6P5F9 | Xpo1    | 0.204 | 0.400 | 0.004  | 0.000  | -0.804 | -0.562 | -0.972 | -0.620 |
| Q9D0D3 | Mtpap   | 0.039 | 0.134 | -0.042 | 0.000  | 0.411  | 0.553  | 0.544  | 0.831  |
| P51859 | Hdgf    | 0.004 | 0.034 | -0.010 | 0.000  | 0.062  | -0.903 | -1.530 | -1.040 |
| P11942 | Cd3g    | 0.167 | 0.349 | -0.367 | 0.000  | 0.062  | -0.670 | -0.495 | -0.158 |
| Q91VE6 | Nifk    | 0.244 | 0.454 | 0.009  | 0.000  | -0.055 | 0.059  | -0.834 | -0.332 |
| O88543 | Cops3   | 0.037 | 0.128 | -0.261 | 0.000  | 0.061  | -0.532 | -1.550 | -0.983 |
| Q9D6S7 | Mrrf    | 0.086 | 0.223 | 0.000  | 0.433  | -0.651 | 0.785  | 0.917  | 0.434  |
| Q9CXT8 | Pmpcb   | 0.017 | 0.082 | 0.000  | 0.156  | -0.441 | 1.050  | 0.643  | 0.643  |
| O09172 | Gclm    | 0.514 | 0.778 | 0.497  | 0.000  | -0.914 | 0.147  | -0.892 | -0.812 |
| O70370 | Ctss    | 0.016 | 0.078 | 0.174  | 0.000  | -0.123 | -0.289 | -0.491 | -0.485 |
| Q9ES52 | Inpp5d  | 0.069 | 0.191 | -0.054 | 0.183  | 0.000  | -0.248 | -0.967 | -0.380 |
| Q8CHT0 | Aldh4a1 | 0.875 | 1.000 | 0.335  | -0.067 | 0.000  | 1.090  | -0.715 | -0.397 |
| O35326 | Srsf5   | 0.051 | 0.157 | 0.057  | 0.000  | -0.537 | -0.598 | -1.720 | -1.290 |
| P61255 | Rpl26   | 0.969 | 1.000 | 0.146  | 0.000  | -0.044 | 0.302  | -0.198 | -0.021 |
| Q9WV54 | Asah1   | 0.436 | 0.693 | 0.241  | 0.000  | -0.799 | -0.033 | -0.720 | -0.851 |
| Q5SWD9 | Tsr1    | 0.007 | 0.048 | 0.044  | -0.144 | 0.000  | -0.590 | -0.766 | -0.441 |
| Q9Z0N1 | Eif2s3x | 0.715 | 0.992 | 0.118  | 0.000  | -0.435 | 0.405  | -0.210 | -0.202 |
| Q9JIG8 | Praf2   | 0.001 | 0.022 | -0.152 | 0.388  | 0.000  | 1.550  | 1.310  | 1.510  |
| P17742 | Ppia    | 0.001 | 0.020 | -0.069 | 0.072  | 0.000  | -0.744 | -1.100 | -0.888 |
| Q9D1N9 | Mrpl21  | 0.001 | 0.019 | 0.000  | 0.089  | -0.218 | 0.892  | 0.811  | 1.010  |
| P21460 | Cst3    | 0.344 | 0.583 | 0.555  | 0.000  | -0.002 | 0.303  | -0.365 | -0.291 |
| Q8QZT1 | Acat1   | 0.050 | 0.156 | 0.000  | 0.181  | -0.006 | 0.765  | 0.228  | 0.592  |
| P60843 | Eif4a1  | 0.768 | 1.000 | 0.365  | 0.000  | -0.115 | 0.496  | -0.360 | -0.167 |
| Q9DCS3 | Mecr    | 0.121 | 0.279 | 0.000  | 0.207  | -0.206 | 1.210  | 0.269  | 0.392  |
| Q9QUI0 | Rhoa    | 0.092 | 0.233 | 0.000  | -0.019 | 0.008  | -0.050 | -0.555 | -0.397 |
| Q7TPH6 | Mycbp2  | 0.256 | 0.470 | 0.044  | -0.016 | 0.000  | 0.048  | -0.906 | -0.239 |
| Q8C0C0 | Zhx2    | 0.138 | 0.303 | -0.142 | 0.000  | 0.004  | -0.455 | -0.390 | -0.046 |
| B2RXR6 | Ankrd44 | 0.004 | 0.036 | 0.067  | -0.178 | 0.000  | -1.230 | -2.070 | -1.460 |
| O89053 | Coro1a  | 0.001 | 0.021 | -0.088 | 0.000  | 0.009  | -0.623 | -0.917 | -0.740 |
| Q9Z0E6 | Gbp2    | 0.096 | 0.238 | -0.595 | 0.652  | 0.000  | -0.971 | -1.400 | -0.481 |
| Q8VCM8 | Ncln    | 0.000 | 0.013 | 0.163  | 0.000  | -0.176 | 2.230  | 1.750  | 2.080  |
| P39054 | Dnm2    | 0.326 | 0.562 | 0.075  | -0.001 | 0.000  | 0.448  | -0.098 | 0.271  |
| O55106 | Strn    | 0.053 | 0.162 | -0.090 | 0.271  | 0.000  | -0.484 | -0.533 | -0.141 |
| Q9QX47 | Son     | 0.342 | 0.582 | -0.273 | 0.117  | 0.000  | -0.128 | -0.274 | -0.155 |
| Q9D883 | U2af1   | 0.235 | 0.442 | 0.393  | -0.112 | 0.000  | 0.274  | -0.934 | -0.764 |
| Q7TMR0 | Prpc    | 0.537 | 0.805 | 0.534  | 0.000  | -0.186 | 0.295  | -0.429 | -0.127 |
| Q8JZQ9 | Eif3b   | 0.260 | 0.476 | 0.275  | -0.073 | 0.000  | 0.153  | -0.697 | -0.305 |
| Q3V0C5 | Usp48   | 0.002 | 0.023 | -0.188 | 0.240  | 0.000  | -1.040 | -1.390 | -1.230 |
| Q922B2 | Dars    | 0.310 | 0.543 | 0.005  | 0.000  | -0.176 | -0.007 | -0.316 | -0.229 |
| Q3THK3 | Gtf2f1  | 0.002 | 0.024 | 0.000  | 0.200  | -0.068 | -1.120 | -1.740 | -1.450 |
| Q8CFX1 | H6pd    | 0.003 | 0.031 | 0.000  | 0.021  | -0.537 | 1.370  | 1.020  | 1.180  |



|        |          |       |       |        |        |        |        |        |        |
|--------|----------|-------|-------|--------|--------|--------|--------|--------|--------|
| Q8K1I7 | Wipf1    | 0.146 | 0.315 | -0.001 | 0.000  | 0.402  | -0.311 | -0.419 | 0.062  |
| Q4VA53 | Pds5b    | 0.031 | 0.116 | -0.082 | 0.000  | 0.035  | -0.347 | -0.548 | -0.198 |
| Q7TPV4 | Mybbp1a  | 0.078 | 0.208 | 0.135  | 0.000  | -0.117 | -0.129 | -0.809 | -0.532 |
| Q3ULD5 | Mccc2    | 0.004 | 0.036 | 0.000  | 0.315  | -0.197 | 1.080  | 0.893  | 0.981  |
| Q8BJS4 | Sun2     | 0.725 | 1.000 | 0.000  | 0.079  | -0.089 | 0.028  | -0.229 | 0.073  |
| Q64324 | Stxbp2   | 0.030 | 0.112 | 0.000  | 0.170  | -0.102 | -0.258 | -0.789 | -0.715 |
| Q9CWK8 | Snx2     | 0.007 | 0.050 | 0.074  | 0.000  | -0.016 | -0.329 | -0.673 | -0.635 |
| Q9DCC8 | Tomm20   | 0.641 | 0.917 | -0.091 | 0.350  | 0.000  | 0.068  | 0.058  | 0.398  |
| O88342 | Wdr1     | 0.001 | 0.019 | -0.112 | 0.000  | 0.084  | -0.978 | -1.390 | -1.190 |
| P55096 | Abcd3    | 0.092 | 0.232 | 0.042  | 0.000  | -0.929 | 1.360  | 1.060  | 0.053  |
| Q80W54 | Zmpste24 | 0.080 | 0.211 | 0.027  | 0.000  | -0.220 | 0.715  | 0.060  | 0.482  |
| P32020 | Scp2     | 0.103 | 0.248 | 0.172  | 0.000  | -0.126 | 0.611  | 0.091  | 0.465  |
| Q8BUH8 | Senp7    | 0.036 | 0.125 | -0.092 | 0.000  | 0.105  | -0.578 | -0.970 | -0.310 |
| Q07797 | Lgals3bp | 0.056 | 0.168 | 0.660  | 0.000  | -0.240 | 1.040  | 0.809  | 0.805  |
| Q9QYB1 | Clic4    | 0.007 | 0.051 | 0.074  | 0.000  | -0.173 | 1.240  | 0.654  | 0.833  |
| Q9CR16 | Ppid     | 0.050 | 0.155 | 0.063  | 0.000  | -0.400 | -0.464 | -0.946 | -0.621 |
| P19096 | Fasn     | 0.558 | 0.826 | 0.157  | 0.000  | -0.066 | 0.282  | -0.464 | -0.161 |
| Q8BTS4 | Nup54    | 0.174 | 0.357 | -0.078 | 0.000  | 0.036  | -0.224 | -0.263 | 0.002  |
| P61750 | Arf4     | 0.057 | 0.168 | 0.156  | -0.200 | 0.000  | 1.220  | 0.315  | 0.670  |
| P43247 | Msh2     | 0.040 | 0.135 | 0.112  | 0.000  | -0.005 | -0.303 | -0.900 | -0.393 |
| Q9CXF4 | Tbc1d15  | 0.442 | 0.698 | 0.404  | 0.000  | -0.414 | 0.186  | -0.566 | -0.489 |
| P47856 | Gfpt1    | 0.260 | 0.476 | 0.041  | -0.007 | 0.000  | 0.080  | -0.490 | -0.204 |
| Q640M1 | Utp14a   | 0.054 | 0.163 | 0.000  | -0.037 | 0.384  | -0.252 | -0.903 | -0.422 |
| Q9QZM0 | Ubqln2   | 0.002 | 0.025 | 0.000  | -0.073 | 0.286  | -0.713 | -0.834 | -0.761 |
| Q60739 | Bag1     | 0.001 | 0.015 | -0.089 | 0.000  | 0.076  | -1.060 | -1.260 | -0.917 |
| Q8BH95 | Echs1    | 0.035 | 0.124 | 0.000  | 0.240  | -0.097 | 0.915  | 0.414  | 0.524  |
| Q9JLV6 | Pnkp     | 0.033 | 0.121 | 0.186  | 0.000  | -0.012 | -0.137 | -0.517 | -0.435 |
| P56391 | Cox6b1   | 0.015 | 0.076 | 0.030  | 0.000  | -0.083 | 0.406  | 0.174  | 0.409  |
| P48758 | Cbr1     | 0.045 | 0.146 | 0.000  | -0.362 | 0.229  | -0.750 | -2.180 | -1.160 |
| Q60668 | Hnrmpd   | 0.029 | 0.111 | -0.167 | 0.000  | 0.014  | -0.668 | -0.810 | -0.301 |
| Q99LF4 | Rtcb     | 0.551 | 0.820 | 0.000  | 0.036  | -0.061 | 0.119  | -0.108 | 0.122  |
| Q91V64 | Isoc1    | 0.027 | 0.106 | 0.263  | 0.000  | -0.176 | -0.967 | -1.210 | -2.380 |
| Q9D3E6 | Stag1    | 0.097 | 0.241 | -0.110 | 0.000  | 0.040  | -0.192 | -0.391 | -0.105 |
| Q9DBE9 | Ftsj3    | 0.149 | 0.319 | 0.213  | 0.000  | -0.414 | -0.104 | -0.908 | -1.010 |
| Q9JLV5 | Cul3     | 0.171 | 0.353 | 0.033  | -0.575 | 0.000  | -0.300 | -1.190 | -0.676 |
| Q99N96 | Mrpl1    | 0.091 | 0.231 | 0.000  | -1.980 | 0.201  | 0.820  | 0.852  | 1.270  |
| Q8K2T8 | Paf1     | 0.000 | 0.013 | 0.000  | -0.060 | 0.046  | -0.832 | -0.873 | -0.672 |
| O09159 | Man2b1   | 0.658 | 0.934 | 0.557  | -0.062 | 0.000  | 0.520  | 0.127  | 0.181  |
| Q9Z1X4 | Ilf3     | 0.531 | 0.798 | -0.320 | 0.120  | 0.000  | -0.211 | -0.422 | 0.045  |
| P42567 | Eps15    | 0.012 | 0.067 | 0.268  | -0.005 | 0.000  | -0.508 | -1.210 | -0.973 |
| Q9CPR7 | Sike1    | 0.285 | 0.509 | -0.334 | 0.039  | 0.000  | -0.127 | -0.901 | -0.255 |
| Q9D0R2 | Tars     | 0.045 | 0.146 | -0.112 | 0.000  | 0.099  | -0.225 | -0.415 | -0.184 |
| Q07076 | Anxa7    | 0.833 | 1.000 | 0.000  | 0.052  | -0.034 | 0.275  | -0.212 | 0.053  |
| Q9QYE6 | Golga5   | 0.161 | 0.339 | 0.042  | -0.319 | 0.000  | 0.172  | 0.003  | 0.235  |
| Q61768 | Kif5b    | 0.532 | 0.799 | 0.107  | 0.000  | -0.003 | 0.348  | -0.450 | -0.300 |
| Q99KE1 | Me2      | 0.952 | 1.000 | 0.000  | 0.140  | -0.205 | 0.190  | -0.212 | -0.072 |
| Q60931 | Vdac3    | 0.007 | 0.050 | 0.000  | 0.252  | -0.058 | 1.080  | 0.902  | 1.570  |
| Q63850 | Nup62    | 0.333 | 0.571 | 0.264  | -3.320 | 0.000  | 0.165  | -0.153 | 0.862  |
| O55098 | Stk10    | 0.435 | 0.692 | -0.223 | 0.161  | 0.000  | -0.488 | -0.706 | 0.292  |
| Q8BZH4 | Pogz     | 0.153 | 0.326 | -0.120 | 0.000  | 0.033  | -0.410 | -0.449 | -0.010 |
| Q9QYJ0 | Dnaja2   | 0.688 | 0.965 | 0.097  | 0.000  | -0.099 | 0.154  | -0.236 | -0.084 |
| Q8CDN6 | Txn1     | 0.008 | 0.051 | 0.000  | 0.040  | -0.283 | -0.969 | -1.380 | -0.821 |
| Q8R5C5 | Actr1b   | 0.301 | 0.529 | -0.159 | 0.417  | 0.000  | 0.472  | 0.374  | 0.126  |
| P09602 | Hmgn2    | 0.380 | 0.629 | -1.030 | 0.000  | 0.113  | -0.438 | -0.284 | -3.170 |
| P09055 | Itgb1    | 0.001 | 0.019 | 0.000  | 0.434  | 0.000  | 1.880  | 1.520  | 1.680  |
| Q924W5 | Smc6     | 0.171 | 0.353 | 0.165  | 0.000  | -0.119 | -0.122 | -0.954 | -0.241 |
| O08663 | Metap2   | 0.390 | 0.640 | 0.466  | -3.020 | 0.000  | -1.320 | -1.100 | -4.830 |
| P09925 | Surf1    | 0.000 | 0.013 | 0.069  | 0.000  | -0.073 | 0.682  | 0.590  | 0.722  |
| O89100 | Grap2    | 0.049 | 0.154 | -0.257 | 0.110  | 0.000  | -0.559 | -2.360 | -1.760 |

|        |          |       |       |        |        |        |        |        |        |
|--------|----------|-------|-------|--------|--------|--------|--------|--------|--------|
| P06745 | Gpi      | 0.005 | 0.039 | 0.533  | -0.070 | 0.000  | -1.010 | -1.620 | -1.360 |
| Q9EQU5 | Set      | 0.009 | 0.055 | 0.000  | 0.489  | -0.112 | -0.929 | -0.885 | -0.687 |
| P58742 | Aaas     | 0.006 | 0.044 | 0.000  | 0.068  | -0.024 | 0.523  | 0.402  | 0.731  |
| Q8BMD8 | Slc25a24 | 0.023 | 0.096 | -0.447 | 0.176  | 0.000  | 0.526  | 0.574  | 0.757  |
| O70172 | Pip4k2a  | 0.136 | 0.301 | 0.051  | 0.000  | -0.088 | -0.007 | -0.946 | -0.646 |
| P62880 | Gnb2     | 0.106 | 0.254 | 0.181  | -0.405 | 0.000  | 0.353  | 0.177  | 0.720  |
| P11103 | Parp1    | 0.506 | 0.770 | -0.125 | 0.040  | 0.000  | -0.190 | -0.321 | 0.120  |
| Q99LC2 | Cstf1    | 0.099 | 0.242 | -0.452 | 0.024  | 0.000  | -0.702 | -0.620 | -0.334 |
| P11352 | Gpx1     | 0.131 | 0.294 | 0.457  | 0.000  | -0.235 | -0.028 | -0.804 | -0.877 |
| Q04750 | Top1     | 0.149 | 0.319 | 0.118  | -0.057 | 0.000  | -0.028 | -0.407 | -0.160 |
| Q8VE47 | Uba5     | 0.001 | 0.020 | 0.048  | -0.035 | 0.000  | -0.621 | -0.940 | -0.867 |
| Q8K4G5 | Ablim1   | 0.436 | 0.693 | -0.562 | 0.000  | 0.335  | -0.503 | -0.450 | -0.049 |
| P06332 | Cd4      | 0.187 | 0.377 | -0.346 | 0.000  | 0.028  | -0.404 | -0.507 | -0.161 |
| Q8BRF7 | Scfd1    | 0.745 | 1.000 | 0.000  | -0.031 | 0.146  | 0.060  | -0.193 | 0.131  |
| P04627 | Araf     | 0.149 | 0.319 | 0.195  | -0.430 | 0.000  | -2.140 | -1.090 | -7.290 |
| Q61545 | Ewsr1    | 0.344 | 0.584 | -0.147 | 0.000  | 0.141  | -0.110 | -0.516 | 0.030  |
| Q9CY64 | Blvra    | 0.001 | 0.017 | 0.070  | 0.000  | -0.027 | -1.010 | -1.480 | -1.270 |
| P54116 | Stom     | 0.556 | 0.825 | 0.677  | 0.000  | -0.243 | 0.446  | -0.539 | -0.245 |
| Q0P678 | Zc3h18   | 0.031 | 0.114 | 0.000  | -0.085 | 0.167  | -0.421 | -1.190 | -0.663 |
| P59235 | Nup43    | 0.560 | 0.829 | -0.120 | 0.383  | 0.000  | -0.494 | 0.070  | 0.192  |
| Q3UW53 | Fam129a  | 0.316 | 0.550 | -0.006 | 0.203  | 0.000  | 0.205  | -0.653 | -0.238 |
| Q02819 | Nucb1    | 0.009 | 0.056 | 0.039  | 0.000  | -0.189 | 0.852  | 0.418  | 0.648  |
| P62334 | Psmc6    | 0.204 | 0.400 | -0.038 | 0.043  | 0.000  | 0.062  | -0.326 | -0.538 |
| P99029 | Prdx5    | 0.996 | 1.000 | 0.234  | 0.000  | -0.266 | 0.051  | -0.201 | 0.121  |
| P56183 | Rrp1     | 0.829 | 1.000 | 1.090  | 0.000  | -2.470 | 0.744  | -3.520 | 0.226  |
| Q9DCR2 | Ap3s1    | 0.247 | 0.458 | 0.237  | -0.394 | 0.000  | 0.805  | 0.129  | 0.105  |
| Q9JLZ8 | Sigirr   | 0.827 | 1.000 | -1.170 | 0.459  | 0.000  | -0.526 | -0.206 | -0.321 |
| Q9QUR6 | Prep     | 0.027 | 0.106 | 0.102  | -0.262 | 0.000  | -0.737 | -1.200 | -0.530 |
| Q9DBP5 | Cmpk1    | 0.018 | 0.084 | 0.000  | 0.122  | -0.056 | -0.724 | -1.950 | -1.410 |
| Q5SFM8 | Rbm27    | 0.299 | 0.528 | -0.487 | 0.001  | 0.000  | 0.226  | -0.114 | 0.081  |
| Q7JJ13 | Brd2     | 0.032 | 0.117 | -0.064 | 0.006  | 0.000  | -0.586 | -1.290 | -0.544 |
| Q6PHZ2 | Camk2d   | 0.078 | 0.209 | -0.861 | 0.391  | 0.000  | -1.070 | -2.170 | -0.983 |
| P29416 | Hexa     | 0.886 | 1.000 | 0.576  | -0.195 | 0.000  | 0.462  | -0.293 | 0.066  |
| O70252 | Hmox2    | 0.188 | 0.378 | 0.000  | 0.189  | -0.038 | 0.252  | 0.067  | 0.428  |
| Q9DB73 | Cyb5r1   | 0.000 | 0.008 | 0.000  | 0.094  | -0.277 | 2.440  | 2.150  | 2.440  |
| Q9DBH5 | Lman2    | 0.002 | 0.025 | 0.000  | 0.055  | -0.225 | 0.807  | 0.612  | 0.822  |
| P62242 | Rps8     | 0.850 | 1.000 | 0.000  | 0.181  | -0.355 | 0.070  | -0.089 | -0.056 |
| Q6P069 | Sri      | 0.434 | 0.691 | -0.202 | 0.027  | 0.000  | -0.084 | -0.301 | -0.063 |
| Q9CZX8 | Rps19    | 0.508 | 0.772 | 0.243  | -0.007 | 0.000  | 0.331  | -0.433 | -0.184 |
| Q07417 | Acads    | 0.730 | 1.000 | 0.089  | 0.000  | -0.125 | 0.435  | -0.537 | -0.263 |
| Q8R1B4 | Eif3c    | 0.348 | 0.589 | 0.218  | 0.000  | -0.044 | 0.214  | -0.467 | -0.267 |
| O88379 | Baz1a    | 0.138 | 0.303 | 0.035  | 0.000  | -0.139 | -0.281 | -0.452 | -0.062 |
| P14429 | H2-Q7    | 0.206 | 0.403 | -0.383 | 0.114  | 0.000  | -0.472 | -0.369 | -0.198 |
| P70452 | Stx4     | 0.379 | 0.628 | 0.000  | 0.361  | -1.230 | 0.582  | 0.088  | -0.010 |
| P12787 | Cox5a    | 0.002 | 0.028 | 0.000  | 0.139  | -0.028 | 0.629  | 0.454  | 0.629  |
| Q8BKE6 | Cyp20a1  | 0.000 | 0.014 | 0.000  | 0.088  | -0.320 | 1.730  | 1.440  | 1.780  |
| P04104 | Krt1     | 0.277 | 0.498 | -0.073 | 0.000  | 0.585  | -0.156 | 1.390  | 1.350  |
| P17439 | Gba      | 0.007 | 0.049 | 0.708  | 0.000  | -0.006 | 1.550  | 1.370  | 1.490  |
| Q9D0M3 | Cyc1     | 0.192 | 0.384 | 0.243  | 0.000  | -0.038 | 0.016  | 0.587  | 0.597  |
| Q7TSI3 | Ppp6r1   | 0.005 | 0.040 | 0.000  | -0.040 | 0.250  | -0.738 | -1.240 | -0.832 |
| Q80X85 | Mrps7    | 0.051 | 0.158 | 0.000  | 0.066  | -0.627 | 0.765  | 0.358  | 0.418  |
| Q99ME9 | Gtpbp4   | 0.155 | 0.329 | 0.013  | -0.133 | 0.000  | -0.088 | -0.821 | -0.361 |
| Q00417 | Tcf7     | 0.842 | 1.000 | -1.160 | 0.000  | 0.065  | -0.570 | -0.372 | 0.138  |
| Q922Q8 | Lrrc59   | 0.002 | 0.028 | 0.000  | 0.070  | -0.353 | 0.875  | 0.825  | 0.768  |
| P24547 | Impdh2   | 0.232 | 0.437 | 0.041  | 0.000  | -0.289 | -0.073 | -0.748 | -0.361 |
| P70670 | Naca     | 0.788 | 1.000 | 0.000  | 0.099  | -0.468 | -0.113 | -0.429 | -0.013 |
| Q61152 | Ptpn18   | 0.001 | 0.020 | -0.173 | 0.000  | 0.344  | -1.430 | -1.960 | -1.780 |
| Q8BGQ7 | Aars     | 0.540 | 0.807 | 0.245  | 0.000  | -0.060 | 0.323  | -0.318 | -0.276 |
| P35486 | Pdha1    | 0.264 | 0.482 | 0.044  | 0.000  | -0.235 | 0.792  | 0.073  | -0.010 |

|        |          |       |       |        |        |        |        |        |        |
|--------|----------|-------|-------|--------|--------|--------|--------|--------|--------|
| Q9CYZ2 | Tpd52l2  | 0.037 | 0.129 | 0.129  | -0.440 | 0.000  | -0.566 | -0.943 | -1.290 |
| P48024 | Eif1     | 0.101 | 0.247 | 0.057  | 0.000  | -0.056 | -0.341 | -0.676 | -0.087 |
| Q9CXU9 | Eif1b    | 0.101 | 0.247 | 0.057  | 0.000  | -0.056 | -0.341 | -0.676 | -0.087 |
| P70168 | Kpnb1    | 0.204 | 0.400 | -0.040 | 0.088  | 0.000  | -0.081 | -0.545 | -0.064 |
| P80318 | Cct3     | 0.041 | 0.138 | 0.007  | 0.000  | -0.029 | -0.227 | -0.751 | -0.412 |
| O88665 | Brd7     | 0.381 | 0.630 | 0.000  | -0.139 | 0.144  | -0.197 | -0.413 | 0.108  |
| Q1HFZ0 | Nsun2    | 0.102 | 0.247 | 0.289  | 0.000  | -0.086 | -0.029 | -1.110 | -0.849 |
| P70333 | Hnrnp2   | 0.656 | 0.932 | -0.681 | 0.027  | 0.000  | -0.074 | -0.027 | -0.211 |
| Q80ZW2 | Them6    | 0.880 | 1.000 | 0.000  | 2.290  | -4.050 | -2.070 | 0.845  | 0.459  |
| Q9D1D4 | Tmed10   | 0.017 | 0.081 | 0.000  | 0.326  | -0.089 | 1.230  | 0.979  | 2.020  |
| Q61166 | Mapre1   | 0.016 | 0.079 | 0.211  | -0.152 | 0.000  | -0.500 | -0.907 | -1.160 |
| Q6P542 | Abcf1    | 0.342 | 0.582 | 0.361  | -0.057 | 0.000  | 0.327  | -0.666 | -0.406 |
| Q9DCE5 | Pak1ip1  | 0.033 | 0.120 | 0.064  | -0.123 | 0.000  | -0.401 | -0.996 | -0.500 |
| Q9JMH9 | Myo18a   | 0.465 | 0.723 | -0.001 | 0.000  | 0.173  | 0.109  | -0.451 | 0.058  |
| O88456 | Capns1   | 0.707 | 0.983 | -0.351 | 0.263  | 0.000  | -0.211 | -0.070 | -0.033 |
| Q8BJ71 | Nup93    | 0.605 | 0.878 | 0.000  | 0.099  | -0.117 | 0.056  | -0.115 | 0.244  |
| O88520 | Shoc2    | 0.850 | 1.000 | 0.000  | -0.539 | 0.000  | -0.051 | -0.911 | 0.193  |
| P53810 | Pitpna   | 0.002 | 0.023 | 0.000  | 0.117  | -0.135 | -1.010 | -1.530 | -1.350 |
| P61804 | Dad1     | 0.002 | 0.025 | 0.054  | 0.000  | -0.232 | 1.770  | 1.190  | 1.270  |
| P39749 | Fen1     | 0.169 | 0.351 | 0.002  | -0.215 | 0.000  | -0.243 | -0.778 | -0.197 |
| Q9WU81 | Slc37a2  | 0.276 | 0.497 | 0.431  | 0.000  | -0.628 | 0.442  | 0.392  | 0.173  |
| P14148 | Rpl7     | 0.006 | 0.044 | 0.207  | -0.004 | 0.000  | 0.767  | 0.494  | 0.739  |
| P61620 | Sec61a1  | 0.001 | 0.019 | 0.000  | 0.072  | -0.131 | 1.560  | 1.060  | 1.370  |
| Q61171 | Prdx2    | 0.040 | 0.134 | 0.089  | 0.000  | -0.208 | -0.353 | -0.755 | -0.402 |
| Q9R1P3 | Psmb2    | 0.006 | 0.044 | 0.222  | 0.000  | -0.028 | -0.810 | -1.210 | -1.570 |
| Q8C7X2 | Emc1     | 0.001 | 0.015 | 0.000  | 0.211  | -0.285 | 1.450  | 1.340  | 1.440  |
| Q9CQB5 | Cisd2    | 0.179 | 0.365 | 0.000  | 0.161  | -0.086 | 0.224  | 0.101  | 0.145  |
| Q8CHP5 | Pym1     | 0.018 | 0.083 | -0.344 | 0.000  | 0.040  | -0.801 | -1.330 | -0.753 |
| Q8K3A0 | Hscb     | 0.378 | 0.627 | 0.020  | 0.000  | -7.410 | -0.071 | 0.082  | -0.054 |
| Q3V1T4 | P3h1     | 0.001 | 0.022 | 0.735  | -0.994 | 0.000  | 4.580  | 3.830  | 4.310  |
| Q8R3N6 | Thoc1    | 0.334 | 0.571 | 0.080  | 0.000  | -0.098 | -0.259 | -0.213 | 0.073  |
| Q64737 | Gart     | 0.258 | 0.473 | 0.691  | 0.000  | -0.051 | 0.448  | -0.834 | -1.050 |
| Q920Q6 | Msi2     | 0.276 | 0.497 | 0.000  | 0.706  | -0.324 | 1.510  | 1.050  | -0.068 |
| Q9Z1Q5 | Clic1    | 0.005 | 0.039 | -0.013 | 0.084  | 0.000  | -0.653 | -1.240 | -1.010 |
| Q9D6K5 | Synj2bp  | 0.056 | 0.167 | 0.000  | 0.262  | -0.061 | 0.573  | 0.279  | 0.805  |
| O54786 | Dffa     | 0.079 | 0.210 | 0.000  | -0.630 | 0.300  | -0.522 | -1.400 | -1.040 |
| Q9EPL9 | Acox3    | 0.674 | 0.951 | 0.021  | 0.000  | -0.636 | 0.263  | -0.494 | -0.944 |
| P97384 | Anxa11   | 0.008 | 0.053 | 0.041  | 0.000  | -0.141 | -0.485 | -0.611 | -0.358 |
| O35381 | Anp32a   | 0.000 | 0.012 | -0.159 | 0.084  | 0.000  | -1.290 | -1.590 | -1.380 |
| P07901 | Hsp90aa1 | 0.021 | 0.090 | 0.000  | 0.010  | -0.335 | -0.557 | -1.180 | -1.010 |
| Q64518 | Atp2a3   | 0.176 | 0.360 | 0.078  | 0.000  | -0.382 | -0.145 | -0.536 | -0.666 |
| Q9QZD8 | Slc25a10 | 0.003 | 0.030 | 0.000  | 0.214  | -0.415 | 1.190  | 1.260  | 1.510  |
| P52633 | Stat6    | 0.079 | 0.210 | 0.000  | -0.088 | 0.044  | -0.100 | -0.740 | -0.588 |
| Q02111 | Prkcq    | 0.722 | 1.000 | 0.000  | 1.430  | -0.213 | -0.229 | 0.752  | 0.016  |
| P62305 | Snrpe    | 0.123 | 0.283 | 0.000  | 0.203  | -0.302 | -0.339 | -0.394 | -1.200 |
| Q80YV2 | Zc3hc1   | 0.030 | 0.113 | -0.583 | 0.055  | 0.000  | -0.937 | -0.866 | -1.450 |
| Q5SUR0 | Pfas     | 0.006 | 0.045 | -0.054 | 0.678  | 0.000  | -1.340 | -1.880 | -1.200 |
| Q80X50 | Ubap2l   | 0.003 | 0.032 | 0.000  | -0.103 | 0.353  | 1.140  | 0.971  | 1.270  |
| Q9D8C4 | Ifi35    | 0.019 | 0.085 | -0.500 | 0.000  | 0.050  | -1.010 | -1.030 | -1.700 |
| Q7TMY8 | Huwe1    | 0.222 | 0.423 | 0.263  | -0.109 | 0.000  | 0.159  | -0.989 | -0.543 |
| Q9JII6 | Akr1a1   | 0.500 | 0.765 | 0.262  | -0.011 | 0.000  | 0.150  | -0.272 | 0.031  |
| P25425 | Pou2f1   | 0.006 | 0.047 | -0.147 | 0.120  | 0.000  | -0.422 | -0.622 | -0.496 |
| O89017 | Lgmn     | 0.545 | 0.813 | 1.600  | -0.051 | 0.000  | 0.284  | -0.932 | 0.738  |
| Q9CWW6 | Pin4     | 0.376 | 0.624 | 0.000  | 0.180  | -0.252 | -0.110 | -0.344 | -0.071 |
| Q61733 | Mrs31    | 0.132 | 0.296 | 0.000  | 0.114  | -0.108 | 0.841  | -0.005 | 0.687  |
| Q8BHZ0 | Fam49a   | 0.018 | 0.083 | 0.100  | 0.000  | -0.048 | -0.759 | -2.060 | -1.560 |
| Q61074 | Ppm1g    | 0.015 | 0.076 | 0.076  | 0.000  | 0.000  | -0.823 | -1.880 | -1.110 |
| Q8R2U0 | Seh1l    | 0.165 | 0.347 | -0.177 | 0.102  | 0.000  | -0.189 | -0.511 | -0.117 |
| Q64378 | Fkbp5    | 0.009 | 0.056 | -0.004 | 0.047  | 0.000  | -0.637 | -1.400 | -1.220 |

|        |          |       |       |        |        |        |        |        |        |
|--------|----------|-------|-------|--------|--------|--------|--------|--------|--------|
| Q91YE7 | Rbm5     | 0.008 | 0.052 | 0.000  | -0.307 | 0.016  | -0.952 | -1.520 | -0.983 |
| Q8BQ30 | Ppp1r18  | 0.409 | 0.660 | -0.391 | 0.000  | 0.142  | -0.536 | -0.383 | 0.028  |
| Q8CBW3 | Abi1     | 0.213 | 0.409 | -0.378 | 0.171  | 0.000  | 0.201  | 0.069  | 0.305  |
| P25976 | Ubtf     | 0.014 | 0.072 | -0.184 | 0.000  | 0.021  | -0.544 | -0.926 | -0.527 |
| Q9CQH3 | Ndufb5   | 0.003 | 0.032 | 0.000  | 0.202  | -0.151 | 0.682  | 0.684  | 0.812  |
| Q8BH74 | Nup107   | 0.749 | 1.000 | -0.109 | 0.284  | 0.000  | -0.001 | -0.230 | 0.225  |
| P97429 | Anxa4    | 0.589 | 0.861 | 0.000  | 0.197  | -0.094 | 0.014  | -0.212 | 0.083  |
| P03921 | MtnD5    | 0.051 | 0.156 | 0.000  | 0.416  | -0.059 | 0.695  | 0.639  | 1.400  |
| Q9CY50 | Ssr1     | 0.002 | 0.025 | 0.000  | 0.307  | -0.320 | 1.390  | 1.330  | 1.580  |
| P20060 | Hexb     | 0.512 | 0.776 | 0.530  | -0.073 | 0.000  | 0.432  | -0.428 | -0.245 |
| Q922Y1 | Ubxn1    | 0.019 | 0.087 | 0.000  | -0.150 | 0.077  | -0.496 | -0.940 | -0.493 |
| P26350 | Ptma     | 0.061 | 0.176 | 0.136  | 0.000  | -0.615 | -0.753 | -2.920 | -2.010 |
| Q8C3J5 | Dock2    | 0.006 | 0.047 | 0.009  | 0.000  | -0.011 | -0.628 | -1.100 | -0.665 |
| O35593 | PsmD14   | 0.036 | 0.125 | 0.000  | -0.104 | 0.054  | -0.306 | -0.715 | -0.334 |
| Q64213 | Sf1      | 0.008 | 0.054 | 0.000  | 0.089  | -0.065 | -0.205 | -0.298 | -0.238 |
| Q8C9V1 | Tbc1d10c | 0.042 | 0.139 | 0.000  | -0.523 | 0.236  | -0.798 | -1.680 | -0.940 |
| Q8K2I4 | Manba    | 0.513 | 0.777 | 0.000  | 0.090  | -0.405 | 0.151  | -0.227 | 0.198  |
| Q7TNV0 | Dek      | 0.006 | 0.047 | 0.137  | -0.007 | 0.000  | -0.513 | -1.050 | -0.888 |
| P62748 | Hpcal1   | 0.005 | 0.041 | 0.000  | 0.247  | -0.109 | -0.560 | -0.589 | -0.515 |
| P62918 | Rpl8     | 0.638 | 0.914 | 0.175  | -0.165 | 0.000  | 0.451  | -0.129 | -0.005 |
| Q9Z1J3 | Nfs1     | 0.866 | 1.000 | 0.239  | 0.000  | -0.042 | 0.878  | -0.349 | -0.124 |
| P17095 | Hmga1    | 0.277 | 0.498 | 0.000  | -0.453 | 0.203  | -0.194 | -1.160 | -0.274 |
| Q8VHR5 | Gatad2b  | 0.198 | 0.392 | -0.373 | 0.000  | 0.093  | -0.487 | -0.543 | -0.135 |
| Q8BHG1 | Nrdc     | 0.000 | 0.008 | -0.090 | 0.116  | 0.000  | -1.730 | -1.490 | -1.520 |
| P83741 | Wnk1     | 0.046 | 0.149 | -0.144 | 0.000  | 0.437  | -0.714 | -1.090 | -0.318 |
| O08582 | Gtpbp1   | 0.039 | 0.133 | 0.342  | -0.062 | 0.000  | -0.272 | -1.110 | -0.866 |
| Q9D0E1 | HnrnpM   | 0.116 | 0.271 | -0.089 | 0.068  | 0.000  | -0.065 | -0.477 | -0.243 |
| Q60631 | Grb2     | 0.005 | 0.041 | -0.091 | 0.403  | 0.000  | -1.080 | -1.510 | -0.944 |
| Q3UDW8 | Hgsnat   | 0.535 | 0.803 | 0.177  | 0.000  | -0.116 | 0.499  | -0.142 | 0.120  |
| P58059 | Mrps21   | 0.054 | 0.163 | 0.000  | 0.089  | -0.066 | 0.647  | 0.140  | 0.589  |
| P14094 | Atp1b1   | 0.004 | 0.034 | -0.400 | 0.000  | 0.313  | 2.120  | 1.460  | 2.270  |
| P53395 | Dbt      | 0.046 | 0.149 | 0.000  | 0.286  | -0.049 | 0.968  | 0.326  | 0.859  |
| Q9ESW4 | Agk      | 0.183 | 0.372 | 0.000  | -0.572 | 0.077  | 0.527  | -0.141 | 0.703  |
| Q8BKS9 | Pum3     | 0.196 | 0.389 | 0.136  | 0.000  | -0.234 | -0.103 | -1.360 | -0.447 |
| O89110 | Casp8    | 0.012 | 0.067 | 0.166  | -0.032 | 0.000  | -1.050 | -1.120 | -2.060 |
| P42230 | Stat5a   | 0.015 | 0.076 | -0.331 | 0.072  | 0.000  | -0.731 | -1.550 | -1.370 |
| Q9Z2L7 | Crlf3    | 0.015 | 0.076 | 0.078  | -0.288 | 0.000  | -0.879 | -2.030 | -1.700 |
| Q9CZ83 | Mrpl55   | 0.003 | 0.031 | 0.173  | 0.000  | -0.267 | 0.903  | 0.758  | 0.928  |
| O70492 | Snx3     | 0.413 | 0.665 | 0.054  | 0.000  | -0.003 | 0.688  | -0.177 | 0.226  |
| Q8BXA5 | Ciptm1l  | 0.009 | 0.056 | 0.000  | 0.069  | -0.288 | 0.729  | 0.507  | 0.942  |
| Q8BG48 | Stk17b   | 0.005 | 0.039 | 0.000  | -0.182 | 0.023  | -1.390 | -1.950 | -1.130 |
| P46664 | Adss     | 0.051 | 0.157 | 0.264  | -0.674 | 0.000  | -0.768 | -1.940 | -1.330 |
| Q9DCT2 | Ndufs3   | 0.021 | 0.090 | -0.343 | 0.080  | 0.000  | 0.597  | 0.506  | 1.070  |
| P62082 | Rps7     | 0.231 | 0.435 | 0.000  | 0.021  | -0.201 | 0.193  | -0.095 | 0.370  |
| Q3UM45 | Ppp1r7   | 0.011 | 0.061 | -0.459 | 0.000  | 0.147  | -1.720 | -1.920 | -1.040 |
| Q62465 | Vat1     | 0.029 | 0.110 | 0.420  | 0.000  | -0.104 | 1.170  | 0.561  | 1.040  |
| Q61107 | Gbp4     | 0.002 | 0.026 | 0.000  | -0.009 | 0.293  | -1.020 | -1.590 | -1.530 |
| P43275 | Hist1h1a | 0.473 | 0.733 | 0.000  | -0.398 | 0.015  | -0.138 | -0.623 | -0.127 |
| Q91VH2 | Snx9     | 0.007 | 0.051 | 0.000  | 0.205  | -0.383 | 1.650  | 1.140  | 0.994  |
| Q9CRD2 | Emc2     | 0.000 | 0.012 | 0.000  | 0.161  | -0.136 | 1.450  | 1.330  | 1.590  |
| Q99JX7 | Nxf1     | 0.309 | 0.542 | 0.393  | -0.510 | 0.000  | -0.281 | -0.727 | -0.190 |
| P63094 | Gnas     | 0.019 | 0.087 | -0.209 | 0.111  | 0.000  | 0.694  | 0.307  | 0.605  |
| Q11011 | Npepps   | 0.059 | 0.174 | 0.306  | 0.000  | -0.087 | -0.142 | -0.600 | -0.447 |
| P02535 | Krt10    | 0.910 | 1.000 | -0.437 | 0.000  | 0.988  | -0.544 | 0.928  | 0.386  |
| P97314 | Csrp2    | 0.001 | 0.019 | -1.840 | 0.000  | 0.161  | 5.250  | 4.780  | 5.010  |
| P18760 | Cfl1     | 0.003 | 0.033 | -0.271 | 0.034  | 0.000  | -0.898 | -1.220 | -0.868 |
| P62962 | Pfn1     | 0.000 | 0.012 | 0.000  | 0.175  | -0.052 | -1.240 | -1.510 | -1.260 |
| P49312 | Hnrmpa1  | 0.225 | 0.427 | -0.046 | 0.209  | 0.000  | -0.160 | -0.235 | 0.055  |
| P97333 | Nrp1     | 0.223 | 0.425 | -0.500 | 0.000  | 0.295  | -0.584 | -0.652 | -0.167 |

|         |          |       |       |        |        |        |        |        |        |
|---------|----------|-------|-------|--------|--------|--------|--------|--------|--------|
| Q8VDP6  | Cdipt    | 0.044 | 0.142 | -0.068 | 0.082  | 0.000  | 0.492  | 0.133  | 0.466  |
| P51660  | Hsd17b4  | 0.034 | 0.122 | 0.027  | 0.000  | -0.287 | 1.110  | 0.293  | 0.795  |
| Q9D8N0  | Eef1g    | 0.431 | 0.687 | 0.665  | -0.080 | 0.000  | 0.863  | -1.110 | -0.938 |
| Q05920  | Pc       | 0.015 | 0.076 | 0.211  | 0.000  | -0.913 | 2.850  | 1.420  | 1.760  |
| P10649  | Gstm1    | 0.260 | 0.476 | 1.250  | 0.000  | -0.306 | 0.019  | -0.763 | -0.382 |
| P61226  | Rap2b    | 0.010 | 0.059 | 0.419  | 0.000  | -0.170 | 1.050  | 0.866  | 0.897  |
| Q3TDN2  | Faf2     | 0.182 | 0.369 | -0.615 | 0.705  | 0.000  | 0.072  | 1.380  | 2.500  |
| Q8K358  | Pigu     | 0.174 | 0.357 | 0.343  | 0.000  | -1.340 | 0.317  | 1.360  | 5.340  |
| P49442  | Inpp1    | 0.013 | 0.070 | -0.686 | 0.009  | 0.000  | -2.310 | -3.380 | -1.760 |
| P61957  | Sumo2    | 0.255 | 0.469 | 0.000  | -0.147 | 0.071  | -0.215 | -3.690 | -0.576 |
| Q8VCW8  | Acsf2    | 0.374 | 0.623 | 0.347  | -0.054 | 0.000  | 0.597  | -1.130 | -0.804 |
| Q8K1J6  | Trnt1    | 0.089 | 0.227 | -0.056 | 0.000  | 0.076  | -0.250 | -0.666 | -0.153 |
| Q02248  | Ctnnb1   | 0.001 | 0.018 | 0.000  | 1.470  | -0.278 | 6.150  | 5.320  | 5.830  |
| Q80VP0  | Tecpr1   | 0.211 | 0.407 | -0.458 | 0.000  | 0.797  | -0.779 | -0.878 | -0.031 |
| Q9WUN2  | Tbk1     | 0.159 | 0.336 | 0.000  | -0.120 | 0.216  | -0.002 | -1.180 | -0.558 |
| Q9CPR5  | Mrpl15   | 0.032 | 0.119 | 0.144  | -1.190 | 0.000  | 1.030  | 0.900  | 1.190  |
| Q8CH25  | Sltm     | 0.673 | 0.950 | -0.415 | 0.000  | 0.073  | -0.058 | -0.117 | 0.051  |
| Q8CBA2  | Sifn5    | 0.102 | 0.247 | 0.000  | -0.213 | 0.161  | -0.133 | -0.594 | -0.422 |
| Q9DCW4  | Etfb     | 0.322 | 0.558 | 0.252  | 0.000  | -0.128 | 0.867  | -0.052 | 0.291  |
| Q9DBR0  | Akap8    | 0.021 | 0.092 | 0.000  | 0.298  | -0.040 | -0.520 | -0.856 | -0.359 |
| Q3UQU0  | Brd9     | 0.145 | 0.314 | -0.026 | 0.000  | 0.187  | -0.021 | -1.600 | -0.720 |
| Q8VD26  | Tmem143  | 0.001 | 0.022 | -0.252 | 0.062  | 0.000  | 0.775  | 0.891  | 1.040  |
| O35638  | Stag2    | 0.144 | 0.311 | 0.000  | 0.186  | -0.178 | -0.177 | -0.493 | -1.410 |
| Q8C1D8  | lws1     | 0.115 | 0.270 | 0.000  | -0.155 | 0.078  | -0.329 | -0.906 | -0.206 |
| Q9Z315  | Sart1    | 0.004 | 0.038 | -0.166 | 0.000  | 0.034  | -0.707 | -1.120 | -0.776 |
| Q9CQ54  | Ndufc2   | 0.001 | 0.022 | 0.044  | 0.000  | -0.180 | 0.889  | 0.645  | 0.923  |
| P17918  | Pcna     | 0.142 | 0.309 | 0.516  | 0.000  | -0.203 | -0.004 | -0.794 | -0.676 |
| Q9CX86  | Hnrnpa0  | 0.237 | 0.445 | -0.227 | 0.000  | 0.302  | 0.083  | -0.505 | -0.595 |
| Q8VCY6  | Utp6     | 0.039 | 0.133 | 0.158  | -0.187 | 0.000  | -0.292 | -0.675 | -0.422 |
| P99024  | Tubb5    | 0.970 | 1.000 | 0.000  | -0.069 | 0.025  | 0.542  | -0.296 | -0.257 |
| P62317  | Snrpd2   | 0.037 | 0.129 | -0.005 | 0.066  | 0.000  | -0.224 | -0.407 | -0.116 |
| Q9CQ75  | Ndufa2   | 0.016 | 0.078 | -0.063 | 0.189  | 0.000  | 0.742  | 0.367  | 0.640  |
| P45376  | Akr1b1   | 0.002 | 0.023 | -0.133 | 0.414  | 0.000  | -1.310 | -1.620 | -1.300 |
| Q00899  | Yy1      | 0.078 | 0.208 | 0.000  | -0.096 | 0.192  | -0.240 | -1.020 | -0.413 |
| P23780  | Glb1     | 0.709 | 0.985 | 0.541  | 0.000  | -0.380 | 0.396  | 0.028  | 0.086  |
| Q8BKJ9  | Sirt7    | 0.048 | 0.152 | 0.000  | -0.263 | 0.089  | -0.314 | -0.839 | -0.582 |
| Q3UUUV5 | Skap1    | 0.002 | 0.023 | -0.314 | 0.000  | 0.236  | -1.930 | -2.300 | -1.630 |
| Q91VM5  | Rbmx1    | 0.172 | 0.354 | -0.370 | 0.000  | 0.091  | -0.513 | -0.512 | -0.165 |
| P09671  | Sod2     | 0.023 | 0.096 | -0.061 | 0.348  | 0.000  | 0.715  | 0.476  | 0.682  |
| Q9D958  | Spcs1    | 0.952 | 1.000 | 0.410  | -1.850 | 0.000  | 0.580  | -2.270 | 0.466  |
| O88844  | ldh1     | 0.617 | 0.891 | 0.610  | 0.000  | -0.573 | 0.268  | 0.140  | 0.187  |
| Q9DB42  | Znf593   | 0.300 | 0.529 | -0.360 | 0.000  | 0.352  | -0.645 | -0.477 | 0.060  |
| P04441  | Cd74     | 0.860 | 1.000 | 0.000  | 0.083  | -0.265 | -0.059 | -0.135 | -0.049 |
| O55029  | Copb2    | 0.051 | 0.158 | 0.023  | 0.000  | -0.067 | -0.281 | -1.100 | -0.638 |
| P52431  | Pold1    | 0.005 | 0.043 | -0.206 | 0.235  | 0.000  | -0.797 | -1.220 | -0.903 |
| Q9Z1D1  | Eif3g    | 0.484 | 0.747 | 0.391  | 0.000  | -0.762 | 0.185  | -1.290 | -0.524 |
| P27048  | Snrpb    | 0.016 | 0.079 | 0.000  | 0.086  | -0.061 | -0.366 | -0.857 | -0.543 |
| Q8K4L3  | Svil     | 0.677 | 0.953 | 0.060  | -0.124 | 0.000  | 0.329  | -0.177 | -0.004 |
| Q99LP6  | Grpel1   | 0.003 | 0.030 | 0.000  | 0.185  | -0.177 | 1.010  | 0.736  | 0.977  |
| Q9CR62  | Slc25a11 | 0.026 | 0.105 | 0.013  | 0.000  | -0.081 | 0.658  | 0.233  | 0.369  |
| O35309  | Nmi      | 0.000 | 0.008 | 0.000  | -0.038 | 0.026  | -0.966 | -1.090 | -0.910 |
| Q8BKC5  | Ipo5     | 0.805 | 1.000 | 0.128  | 0.000  | -0.716 | 0.189  | -0.657 | -0.408 |
| Q8BH97  | Rcn3     | 0.000 | 0.010 | 0.000  | 0.300  | -1.020 | 5.700  | 5.470  | 5.630  |
| P42932  | Cct8     | 0.038 | 0.129 | 0.019  | 0.000  | -0.027 | -0.248 | -0.835 | -0.494 |
| Q8BHJ5  | Tbl1xr1  | 0.162 | 0.341 | -0.117 | 0.000  | 0.120  | -0.368 | -2.330 | -0.539 |
| Q9WUK4  | Rfc2     | 0.057 | 0.169 | 0.113  | 0.000  | -0.228 | -0.245 | -0.935 | -0.770 |
| Q8BH24  | Tm9sf4   | 0.003 | 0.032 | 0.024  | 0.000  | -0.422 | 0.875  | 0.752  | 0.962  |
| Q921G8  | Tubgcp2  | 0.065 | 0.184 | 0.000  | -0.034 | 0.085  | -0.377 | -0.541 | -0.083 |
| Q3UPL0  | Sec31a   | 0.955 | 1.000 | 0.030  | -0.312 | 0.000  | 0.370  | -0.502 | -0.200 |

|        |         |       |       |        |        |        |        |        |        |
|--------|---------|-------|-------|--------|--------|--------|--------|--------|--------|
| P45952 | Acadm   | 0.441 | 0.697 | 0.020  | 0.000  | -0.423 | 0.852  | -0.186 | -0.129 |
| Q9Z2E1 | Mbd2    | 0.061 | 0.176 | -0.257 | 0.000  | 0.089  | -0.475 | -0.467 | -0.235 |
| Q6ZQF7 | Jade2   | 0.007 | 0.048 | -0.162 | 0.087  | 0.000  | -0.756 | -0.903 | -0.512 |
| Q9ERN0 | Scamp2  | 0.659 | 0.935 | 0.258  | 0.000  | -0.346 | 0.217  | -0.347 | -0.321 |
| O35900 | Lsm2    | 0.000 | 0.011 | -0.100 | 0.000  | 0.134  | -1.180 | -1.020 | -1.150 |
| Q9CX30 | Yif1b   | 0.001 | 0.018 | -0.142 | 0.000  | 0.081  | 1.740  | 1.320  | 1.910  |
| P51912 | Slc1a5  | 0.002 | 0.025 | 0.161  | 0.000  | -0.159 | 0.905  | 0.762  | 1.060  |
| Q80ZS3 | Mrps26  | 0.050 | 0.155 | -0.354 | 0.562  | 0.000  | 0.950  | 0.666  | 0.952  |
| Q99LH2 | Ptdss1  | 0.004 | 0.038 | 0.073  | 0.000  | -0.255 | 0.781  | 1.180  | 0.770  |
| Q01965 | Ly9     | 0.539 | 0.807 | 0.248  | -0.106 | 0.000  | -0.213 | -0.306 | 0.254  |
| P23198 | Cbx3    | 0.053 | 0.162 | -0.100 | 0.000  | 0.464  | -0.392 | -0.638 | -0.271 |
| O09061 | Psmb1   | 0.002 | 0.022 | 0.000  | 0.060  | -0.048 | -0.871 | -1.280 | -0.911 |
| P63028 | Tpt1    | 0.111 | 0.264 | -0.589 | 1.150  | 0.000  | -2.170 | -1.060 | -0.523 |
| Q9Z2Q5 | Mrpl40  | 0.003 | 0.031 | 0.154  | -0.056 | 0.000  | 0.713  | 0.525  | 0.546  |
| Q9ES46 | Parvb   | 0.600 | 0.873 | 0.000  | 0.158  | -1.990 | -0.638 | -0.108 | -3.010 |
| E9PVA8 | Gcn1    | 0.557 | 0.825 | 0.132  | 0.000  | -0.329 | 0.500  | -0.383 | 0.255  |
| O88291 | Znf326  | 0.531 | 0.798 | -0.617 | 0.000  | 0.031  | -0.141 | -0.078 | 0.089  |
| E9Q394 | Akap13  | 0.012 | 0.068 | -0.244 | 0.000  | 0.099  | -0.813 | -1.320 | -0.739 |
| Q8C2K5 | Rasal3  | 0.018 | 0.083 | -0.082 | 0.141  | 0.000  | -0.512 | -1.320 | -0.924 |
| P05555 | Ilgam   | 0.903 | 1.000 | 1.640  | -0.097 | 0.000  | 1.180  | 0.078  | 0.022  |
| P23475 | Xrcc6   | 0.009 | 0.056 | 0.040  | 0.000  | -0.446 | -0.978 | -1.630 | -1.300 |
| Q04447 | Ckb     | 0.070 | 0.192 | 0.000  | 0.157  | -0.135 | -0.164 | -0.636 | -0.365 |
| Q924T2 | Mrps2   | 0.014 | 0.073 | 0.000  | 0.348  | -0.330 | 0.736  | 1.060  | 0.937  |
| Q9Z1M8 | Ik      | 0.021 | 0.092 | 0.000  | 0.281  | -0.201 | -0.702 | -0.501 | -0.461 |
| D3YXK2 | Safb    | 0.010 | 0.060 | -0.321 | 0.077  | 0.000  | -0.723 | -0.601 | -0.827 |
| Q9CQA3 | Sdhb    | 0.005 | 0.042 | 0.000  | 0.126  | -0.143 | 0.648  | 0.433  | 0.552  |
| O70251 | Eef1b   | 0.042 | 0.140 | 0.083  | -0.155 | 0.000  | -0.239 | -0.809 | -0.633 |
| Q6Q899 | Ddx58   | 0.144 | 0.311 | 0.000  | 0.060  | -0.766 | -0.397 | -1.090 | -1.250 |
| Q9CQ71 | Rpa3    | 0.181 | 0.368 | -0.082 | 0.000  | 0.202  | -0.347 | -0.889 | -3.700 |
| P21447 | Abcb1a  | 0.208 | 0.404 | -0.389 | 0.059  | 0.000  | -0.616 | -0.615 | -0.099 |
| Q99JI4 | Psmd6   | 0.028 | 0.107 | 0.000  | 0.155  | -0.067 | -0.324 | -0.253 | -0.600 |
| Q9DAS9 | Gng12   | 0.017 | 0.080 | 1.250  | -0.499 | 0.000  | 2.910  | 2.090  | 2.560  |
| Q8CH02 | Sugp1   | 0.095 | 0.237 | -0.273 | 0.000  | 0.142  | -0.752 | -0.679 | -0.159 |
| O55128 | Sap18   | 0.043 | 0.142 | -0.163 | 0.000  | 0.168  | -0.507 | -2.010 | -1.380 |
| Q8CG76 | Akr7a2  | 0.383 | 0.632 | -0.121 | 0.000  | 0.029  | 0.397  | -0.088 | 0.045  |
| Q9QY24 | Zbp1    | 0.179 | 0.364 | -0.179 | 0.000  | 0.456  | -0.213 | -0.556 | -0.097 |
| Q8BJW6 | Eif2a   | 0.743 | 1.000 | 0.280  | -0.084 | 0.000  | 0.391  | -0.452 | -0.025 |
| Q8C2Q3 | Rbm14   | 0.597 | 0.870 | -0.370 | 0.000  | 0.306  | -0.338 | -0.331 | 0.164  |
| Q9D3P8 | Plgrkt  | 0.012 | 0.069 | -0.004 | 0.232  | 0.000  | 0.479  | 0.379  | 0.528  |
| Q3UJD6 | Usp19   | 0.246 | 0.457 | 0.704  | -0.028 | 0.000  | 0.999  | 0.247  | 0.759  |
| Q9ER69 | Wtap    | 0.018 | 0.084 | 0.000  | -0.142 | 0.111  | -0.903 | -1.710 | -0.814 |
| Q9D8B3 | Chmp4b  | 0.033 | 0.119 | 0.000  | -0.068 | 0.070  | -0.181 | -0.595 | -0.445 |
| Q9WVJ2 | Psmd13  | 0.040 | 0.134 | 0.000  | -0.037 | 0.010  | -0.179 | -0.699 | -0.638 |
| Q9D358 | Acp1    | 0.010 | 0.060 | 0.000  | 0.034  | -0.377 | -0.763 | -1.300 | -1.250 |
| P11031 | Sub1    | 0.128 | 0.291 | 0.485  | 0.000  | -0.229 | -0.017 | -1.030 | -0.866 |
| Q6ZWU9 | Rps27   | 0.484 | 0.747 | 0.000  | 0.208  | -0.051 | 0.074  | -0.521 | 0.101  |
| Q64282 | Ifit1   | 0.387 | 0.636 | 0.484  | -0.260 | 0.000  | 0.741  | -0.075 | 0.507  |
| Q9JK48 | Sh3glb1 | 0.086 | 0.222 | 0.000  | 0.081  | -0.382 | -0.354 | -0.952 | -0.542 |
| Q8BY89 | Slc44a2 | 0.203 | 0.400 | 0.143  | -0.178 | 0.000  | 0.730  | -0.130 | 0.759  |
| P98083 | Shc1    | 0.721 | 1.000 | 0.042  | -0.011 | 0.000  | 1.180  | -0.727 | 0.209  |
| Q9EQ28 | Pold3   | 0.000 | 0.013 | 0.036  | 0.000  | -0.085 | -0.691 | -0.831 | -0.668 |
| Q8BTI8 | Srrm2   | 0.272 | 0.492 | -0.683 | 0.000  | 0.080  | -0.469 | -0.866 | -0.362 |
| Q9CPW4 | Arpc5   | 0.450 | 0.708 | 0.000  | -0.098 | 0.034  | 0.163  | -0.086 | 0.066  |
| Q9WUU7 | Ctsz    | 0.118 | 0.274 | 0.656  | -0.102 | 0.000  | 0.028  | -1.080 | -0.862 |
| Q922Q1 | Mosc 2  | 0.217 | 0.416 | 0.000  | 0.380  | -0.531 | 0.398  | 0.188  | 0.486  |
| Q3THS6 | Mat2a   | 0.000 | 0.013 | 0.099  | -0.109 | 0.000  | -0.881 | -1.060 | -0.919 |
| Q6NVF9 | Cpsf6   | 0.003 | 0.032 | 0.000  | -0.136 | 0.019  | -0.650 | -0.911 | -0.604 |
| P05202 | Got2    | 0.002 | 0.028 | 0.000  | 0.188  | -0.073 | 0.799  | 0.617  | 0.665  |
| P62874 | Gnb1    | 0.000 | 0.013 | 0.000  | 0.012  | -0.274 | 1.780  | 1.420  | 1.780  |

|        |          |       |       |        |        |        |        |        |        |
|--------|----------|-------|-------|--------|--------|--------|--------|--------|--------|
| O08756 | Hsd17b10 | 0.087 | 0.224 | -0.012 | 0.447  | 0.000  | 0.862  | 0.393  | 0.563  |
| Q9JL35 | Hmgn5    | 0.058 | 0.171 | -0.153 | 0.000  | 0.090  | -0.490 | -0.558 | -0.153 |
| Q05816 | Fabp5    | 0.681 | 0.957 | 0.000  | 0.842  | -2.280 | 0.637  | -5.690 | 0.568  |
| Q9QYB5 | Add3     | 0.122 | 0.281 | 0.000  | -0.422 | 0.087  | -0.199 | -1.070 | -0.858 |
| Q64133 | Maoa     | 0.000 | 0.011 | 0.151  | 0.000  | -0.761 | 3.640  | 3.580  | 3.770  |
| P22315 | Fech     | 0.179 | 0.364 | 0.378  | -1.300 | 0.000  | 1.010  | 0.491  | 0.277  |
| Q80V26 | Impad1   | 0.000 | 0.014 | 0.210  | -0.225 | 0.000  | 1.400  | 1.310  | 1.370  |
| Q9DAA6 | Exosc1   | 0.980 | 1.000 | 0.000  | 1.410  | -0.356 | -0.065 | 0.682  | 0.391  |
| Q921K9 | Bcl7b    | 0.026 | 0.105 | -0.081 | 0.372  | 0.000  | -0.672 | -1.020 | -0.387 |
| Q99PV8 | Bcl11b   | 0.314 | 0.547 | -0.287 | 0.000  | 0.223  | -0.356 | -0.661 | 0.065  |
| Q9CPQ8 | Atp5l    | 0.001 | 0.022 | -0.234 | 0.085  | 0.000  | 0.683  | 0.763  | 0.798  |
| P24369 | Ppib     | 0.003 | 0.033 | 0.000  | 0.096  | -0.188 | 0.909  | 0.584  | 0.780  |
| Q99LE6 | Abcf2    | 0.419 | 0.673 | 0.556  | -0.007 | 0.000  | 0.704  | 0.144  | 0.369  |
| Q8BHB4 | Wdr3     | 0.325 | 0.561 | -0.953 | 0.000  | 0.292  | -0.509 | -0.492 | -1.080 |
| P21956 | Mfge8    | 0.010 | 0.061 | 0.000  | -0.252 | 0.038  | 1.480  | 0.660  | 1.380  |
| O55126 | Gbas     | 0.027 | 0.106 | 1.180  | -0.355 | 0.000  | 1.730  | 1.880  | 2.050  |
| O35368 | Ifi203   | 0.019 | 0.087 | -0.210 | 0.033  | 0.000  | -0.572 | -1.050 | -1.390 |
| Q8CH18 | Ccar1    | 0.158 | 0.335 | -0.956 | 0.094  | 0.000  | -0.824 | -1.620 | -0.710 |
| Q3UMR5 | Mcu      | 0.004 | 0.038 | 0.000  | 0.207  | -0.231 | 0.923  | 0.701  | 0.918  |
| P84099 | Rpl19    | 0.926 | 1.000 | 0.090  | 0.000  | -0.109 | 0.249  | -0.392 | 0.186  |
| Q9R0H0 | Acox1    | 0.000 | 0.012 | 0.521  | 0.000  | -0.037 | 2.920  | 2.570  | 2.770  |
| Q9D024 | Ccdc47   | 0.003 | 0.031 | 0.000  | 0.288  | -0.108 | 1.170  | 0.992  | 1.430  |
| Q9WUR2 | Eci2     | 0.392 | 0.641 | -0.002 | 0.400  | 0.000  | 0.637  | 0.088  | 0.274  |
| Q60766 | Irgm1    | 0.018 | 0.083 | 0.051  | 0.000  | -0.187 | 0.495  | 0.228  | 0.373  |
| P62983 | Rps27a   | 0.185 | 0.374 | 0.000  | -0.150 | 0.017  | -0.164 | -0.623 | -0.142 |
| Q6ZWV3 | Rpl10    | 0.061 | 0.176 | 0.051  | -0.075 | 0.000  | 0.587  | 0.110  | 0.392  |
| B9EJ86 | Osbp18   | 0.137 | 0.302 | 0.203  | 0.000  | -0.375 | 0.463  | 0.106  | 0.376  |
| Q9Z2X1 | Hnrnpf   | 0.015 | 0.076 | -0.128 | 0.274  | 0.000  | -0.417 | -0.823 | -0.664 |
| P35700 | Prdx1    | 0.130 | 0.293 | 0.028  | 0.000  | -0.030 | 0.421  | -0.006 | 0.325  |
| P16330 | Cnp      | 0.135 | 0.298 | 0.000  | 0.133  | -0.102 | -0.008 | -0.671 | -0.448 |
| Q61735 | Cd47     | 0.827 | 1.000 | 0.608  | 0.000  | -0.357 | -0.209 | -0.255 | 1.080  |
| Q05CL8 | Larp7    | 0.002 | 0.029 | 0.038  | -0.083 | 0.000  | -0.704 | -1.150 | -0.895 |
| Q61578 | Fdxr     | 0.099 | 0.243 | 0.000  | 0.172  | -0.061 | -0.043 | -0.801 | -0.540 |
| Q61136 | Prpf4b   | 0.129 | 0.291 | 0.000  | 0.121  | -0.928 | -0.820 | -0.932 | -0.971 |
| O88559 | Men1     | 0.002 | 0.025 | -0.161 | 0.000  | 0.096  | -0.644 | -0.763 | -0.597 |
| Q8K363 | Ddx18    | 0.197 | 0.391 | 0.093  | -0.221 | 0.000  | 0.055  | -0.960 | -0.698 |
| Q8JZQ2 | Afg3l2   | 0.015 | 0.076 | 0.000  | 0.090  | -0.109 | 0.828  | 0.358  | 0.590  |
| P62313 | Lsm6     | 0.017 | 0.081 | 0.000  | -0.578 | 0.234  | -1.060 | -1.350 | -1.030 |
| P62259 | Ywhae    | 0.027 | 0.105 | 0.000  | 0.068  | -0.183 | -0.420 | -1.160 | -0.884 |
| Q61753 | Phgdh    | 0.305 | 0.536 | 0.093  | 0.000  | -0.202 | 0.150  | -0.694 | -0.523 |
| Q505F5 | Lrrc47   | 0.193 | 0.385 | 0.492  | 0.000  | -0.011 | 0.172  | -0.814 | -0.432 |
| P07742 | Rrm1     | 0.156 | 0.330 | 1.310  | -0.668 | 0.000  | -0.320 | -1.880 | -1.010 |
| Q9CSN1 | Snw1     | 0.101 | 0.247 | 0.000  | -0.182 | 0.300  | -0.364 | -0.567 | -0.141 |
| Q9D880 | Timm50   | 0.034 | 0.123 | 0.000  | 0.165  | -0.056 | 0.558  | 0.221  | 0.486  |
| Q6ZQ88 | Kdm1a    | 0.170 | 0.353 | 0.000  | 0.467  | -0.476 | -0.467 | -0.683 | -0.320 |
| Q08642 | Padi2    | 0.002 | 0.027 | 0.000  | -0.067 | 0.169  | -1.410 | -1.390 | -0.906 |
| Q7TSG2 | Ctdp1    | 0.053 | 0.162 | -0.333 | 0.000  | 0.669  | -0.845 | -1.500 | -0.585 |
| P97496 | Smarcc1  | 0.887 | 1.000 | -0.284 | 1.510  | 0.000  | 0.430  | 1.030  | -0.553 |
| Q9CPR4 | Rpl17    | 0.058 | 0.171 | 0.038  | 0.000  | -0.028 | 0.436  | 0.083  | 0.437  |
| Q6A068 | Cdc5l    | 0.072 | 0.196 | -0.551 | 0.000  | 0.012  | -0.825 | -0.927 | -0.473 |
| P53986 | Slc16a1  | 0.170 | 0.352 | 0.555  | 0.000  | -0.036 | 1.090  | 0.354  | 0.539  |
| Q60902 | Eps15l1  | 0.605 | 0.878 | 0.310  | -0.100 | 0.000  | -0.085 | -0.310 | 0.258  |
| Q9QXT0 | Cnpy2    | 0.001 | 0.019 | 0.000  | 0.051  | -0.133 | 1.060  | 0.742  | 0.879  |
| Q6A4J8 | Usp7     | 0.012 | 0.067 | 0.000  | -0.009 | 0.033  | -0.659 | -1.400 | -0.850 |
| Q9CYL5 | Glpr2    | 0.076 | 0.205 | 0.000  | -0.110 | 0.013  | 0.537  | 0.043  | 0.419  |
| Q9CQW1 | Ykt6     | 0.330 | 0.568 | -0.082 | 0.999  | 0.000  | 0.328  | 0.902  | 1.060  |
| Q61595 | Ktn1     | 0.022 | 0.095 | 0.000  | -0.106 | 0.163  | 0.570  | 0.650  | 1.220  |
| Q6PF93 | Pik3c3   | 0.004 | 0.034 | 0.000  | 0.082  | -0.066 | -0.656 | -0.946 | -1.160 |
| P70296 | Pebp1    | 0.000 | 0.012 | -0.033 | 0.000  | 0.005  | -1.230 | -1.610 | -1.490 |

|        |         |       |       |        |        |        |        |        |        |
|--------|---------|-------|-------|--------|--------|--------|--------|--------|--------|
| P28271 | Aco1    | 0.002 | 0.024 | 0.000  | -0.026 | 0.042  | -0.794 | -1.280 | -1.150 |
| Q9QXB9 | Drg2    | 0.746 | 1.000 | 0.545  | -0.088 | 0.000  | 0.489  | -0.337 | -0.021 |
| P29341 | Pabpc1  | 0.216 | 0.413 | 0.000  | 0.523  | -0.083 | -0.141 | -0.164 | -0.096 |
| Q64735 | Cr1l    | 0.871 | 1.000 | 0.107  | 0.000  | -0.145 | 0.063  | -0.267 | 0.095  |
| Q8BGU5 | Ccny    | 0.233 | 0.438 | -0.007 | 0.027  | 0.000  | 0.181  | -0.036 | 0.360  |
| Q8K2C9 | Hacd3   | 0.081 | 0.213 | -0.211 | 0.067  | 0.000  | 0.124  | 0.145  | 0.335  |
| O70439 | Stx7    | 0.141 | 0.308 | 0.241  | 0.000  | -0.122 | -0.013 | -0.452 | -0.348 |
| Q8K2C7 | Os9     | 0.015 | 0.075 | -0.244 | 0.661  | 0.000  | 1.410  | 1.240  | 1.200  |
| P62482 | Kcnab2  | 0.556 | 0.825 | 0.000  | 0.764  | -1.840 | -0.436 | -2.640 | -0.126 |
| Q501J6 | Ddx17   | 0.007 | 0.048 | -0.046 | 0.116  | 0.000  | -0.532 | -0.750 | -0.397 |
| P20065 | Tmsb4x  | 0.010 | 0.058 | 0.187  | 0.000  | -0.161 | -1.300 | -2.470 | -1.480 |
| P23708 | NfyA    | 0.195 | 0.387 | 0.098  | 0.000  | -0.157 | -0.432 | -0.614 | -3.200 |
| Q922Q9 | Chid1   | 0.852 | 1.000 | 0.030  | 0.000  | -0.341 | -0.419 | 0.214  | -0.239 |
| P70399 | Tp53bp1 | 0.062 | 0.178 | 0.267  | 0.000  | -0.013 | -0.418 | -1.440 | -0.510 |
| Q3TIR3 | Ric8a   | 0.860 | 1.000 | 0.000  | -0.572 | 0.168  | 0.033  | -1.140 | 0.413  |
| Q5SSL4 | Abr     | 0.067 | 0.188 | 0.000  | -0.140 | 0.026  | -0.313 | -1.340 | -0.724 |
| Q9CZM2 | Rpl15   | 0.017 | 0.080 | 0.110  | 0.000  | -0.154 | 0.555  | 0.302  | 0.373  |
| Q80UW8 | Polr2e  | 0.036 | 0.126 | 0.000  | -0.030 | 0.211  | -0.203 | -0.628 | -0.347 |
| Q9Z2A7 | Dgat1   | 0.041 | 0.136 | 0.000  | 0.214  | -0.404 | 0.617  | 0.361  | 0.650  |
| Q99LJ6 | Gpx7    | 0.000 | 0.012 | 0.150  | -1.130 | 0.000  | 5.360  | 4.910  | 5.340  |
| Q9WTX6 | Cul1    | 0.660 | 0.936 | 0.000  | -2.550 | 0.489  | 0.572  | -1.490 | -3.190 |
| Q924Z4 | Cers2   | 0.033 | 0.119 | 0.000  | 0.616  | -0.229 | 0.912  | 0.981  | 0.929  |
| Q9Z103 | Adnp    | 0.796 | 1.000 | -0.620 | 0.000  | 0.145  | -0.140 | -0.320 | 0.219  |
| Q07113 | Igf2r   | 0.000 | 0.008 | 0.000  | -0.092 | 0.121  | 1.850  | 1.700  | 1.910  |
| Q5XKN4 | Jagn1   | 0.013 | 0.069 | -0.346 | 0.043  | 0.000  | 0.703  | 0.682  | 1.270  |
| Q9D706 | Rpap3   | 0.076 | 0.205 | 0.123  | -0.216 | 0.000  | -0.201 | -0.665 | -0.416 |
| Q9JHS3 | Lamtor2 | 0.211 | 0.407 | 0.426  | -0.037 | 0.000  | 0.206  | -0.733 | -0.512 |
| A2AGT5 | Ckap5   | 0.082 | 0.216 | 0.000  | -0.236 | 0.124  | -0.162 | -0.706 | -0.630 |
| Q60865 | Caprin1 | 0.278 | 0.499 | 0.134  | 0.000  | -0.385 | -0.068 | -0.729 | -0.380 |
| Q8K019 | Bclaf1  | 0.022 | 0.095 | -0.039 | 0.072  | 0.000  | -0.301 | -0.823 | -0.523 |
| Q8BWF2 | Gimap5  | 0.015 | 0.075 | -0.145 | 0.000  | 0.167  | -0.476 | -0.802 | -0.463 |
| Q99MI6 | Gimap3  | 0.015 | 0.075 | -0.145 | 0.000  | 0.167  | -0.476 | -0.802 | -0.463 |
| Q8R323 | Rfc3    | 0.159 | 0.336 | 0.374  | 0.000  | -0.078 | 0.115  | -1.040 | -0.693 |
| P97315 | Csrp1   | 0.051 | 0.158 | -2.340 | 0.000  | 1.880  | 2.360  | 4.050  | 4.750  |
| Q8C522 | Endod1  | 0.757 | 1.000 | 0.000  | 0.145  | -0.042 | 0.232  | -0.229 | -0.045 |
| Q9CQV8 | Ywhab   | 0.002 | 0.028 | -0.049 | 0.104  | 0.000  | -0.851 | -1.410 | -1.150 |
| Q921F2 | Tardbp  | 0.080 | 0.211 | 0.004  | 0.000  | -0.021 | -0.142 | -0.728 | -0.349 |
| P63280 | Ube2i   | 0.764 | 1.000 | 0.000  | 0.245  | -0.255 | -0.134 | -0.038 | 0.016  |
| P68254 | Ywhaq   | 0.006 | 0.046 | -0.139 | 0.000  | 0.050  | -0.858 | -1.630 | -1.230 |
| Q8VDL4 | Adpgk   | 0.170 | 0.352 | 0.785  | 0.000  | -0.022 | 1.230  | 0.505  | 0.737  |
| Q5XJE5 | Leo1    | 0.033 | 0.119 | -0.326 | 0.153  | 0.000  | -0.839 | -0.635 | -1.470 |
| Q4FK66 | Prpf38a | 0.020 | 0.088 | 0.219  | -0.245 | 0.000  | -0.513 | -0.993 | -0.699 |
| Q9D855 | Uqcrb   | 0.013 | 0.069 | 0.000  | 0.173  | -0.233 | 0.669  | 0.448  | 0.554  |
| Q5M8N4 | Sdr39u1 | 0.975 | 1.000 | -0.090 | 1.850  | 0.000  | -0.753 | 1.040  | 1.390  |
| Q8BRN9 | Cc2d1b  | 0.026 | 0.105 | 0.000  | 0.668  | -0.145 | -1.050 | -1.940 | -0.829 |
| Q8BH69 | Sephs1  | 0.009 | 0.056 | -0.042 | 0.000  | 0.303  | -1.280 | -1.270 | -0.629 |
| P70302 | Stim1   | 0.048 | 0.152 | 0.074  | 0.000  | -0.139 | 0.247  | 0.124  | 0.379  |
| P19536 | Cox5b   | 0.287 | 0.512 | -0.201 | 0.104  | 0.000  | 0.204  | -0.054 | 0.216  |
| Q62093 | Srsf2   | 0.063 | 0.181 | 0.470  | -0.085 | 0.000  | -0.167 | -1.240 | -1.120 |
| Q8R050 | Gspt1   | 0.272 | 0.492 | 0.345  | -0.104 | 0.000  | 0.231  | -0.805 | -0.456 |
| Q791V5 | Mtch2   | 0.007 | 0.048 | 0.000  | 0.565  | -0.017 | 1.160  | 1.140  | 1.190  |
| P35279 | Rab6a   | 0.697 | 0.973 | 0.155  | 0.000  | -0.059 | 0.176  | -0.128 | 0.205  |
| P57784 | Snrpa1  | 0.013 | 0.070 | -0.141 | 0.155  | 0.000  | -0.593 | -0.649 | -0.350 |
| P14869 | Rplp0   | 0.093 | 0.235 | 0.077  | 0.000  | -0.078 | 0.564  | 0.057  | 0.406  |
| P61022 | Chp1    | 0.001 | 0.019 | 0.138  | -0.075 | 0.000  | 1.490  | 1.050  | 1.450  |
| Q8BLF1 | Nceh1   | 0.001 | 0.019 | 0.000  | 0.056  | -0.064 | 0.628  | 0.446  | 0.552  |
| O54890 | Itgb3   | 0.385 | 0.633 | 0.000  | 0.662  | -0.700 | -0.246 | -0.257 | -0.808 |
| Q9JJ28 | Flii    | 0.231 | 0.435 | 0.000  | 0.161  | -0.371 | -0.054 | -0.816 | -0.487 |
| O70310 | Nmt1    | 0.544 | 0.811 | 0.098  | -0.428 | 0.000  | 0.144  | -1.000 | -0.217 |



|        |          |       |       |        |        |        |        |        |        |
|--------|----------|-------|-------|--------|--------|--------|--------|--------|--------|
| Q3U1J4 | Ddb1     | 0.021 | 0.091 | -0.034 | 0.216  | 0.000  | -0.354 | -1.040 | -0.931 |
| Q9Z130 | Hnrnpdl  | 0.499 | 0.764 | 0.000  | 0.040  | -2.550 | -0.201 | -0.411 | 0.032  |
| P62257 | Ube2h    | 0.503 | 0.767 | 0.000  | -0.443 | 0.167  | -0.211 | -0.606 | -0.014 |
| P62915 | Gtf2b    | 0.008 | 0.054 | 0.170  | 0.000  | -0.046 | -0.454 | -0.911 | -0.672 |
| O35250 | Exoc7    | 0.017 | 0.080 | -0.249 | 0.000  | 0.056  | -0.422 | -0.781 | -0.742 |
| P50172 | Hsd11b1  | 0.261 | 0.477 | 0.205  | 0.000  | -0.348 | -0.044 | -0.433 | -0.522 |
| Q6NZB0 | Dnajc8   | 0.099 | 0.243 | -0.028 | 0.000  | 0.279  | -0.162 | -0.578 | -0.129 |
| Q9CZY3 | Ube2v1   | 0.009 | 0.057 | 0.000  | -0.037 | 0.271  | -0.626 | -1.190 | -0.739 |
| Q9CY57 | Chtop    | 0.143 | 0.309 | -0.418 | 0.117  | 0.000  | -0.544 | -0.832 | -0.228 |
| Q9ET26 | Rnf114   | 0.004 | 0.033 | -0.147 | 0.271  | 0.000  | -1.180 | -1.710 | -2.010 |
| P35276 | Rab3d    | 0.330 | 0.567 | 0.916  | -0.442 | 0.000  | 0.434  | -2.060 | -0.646 |
| Q91WN1 | Dnajc9   | 0.034 | 0.122 | -0.034 | 0.000  | 0.155  | -0.381 | -0.634 | -0.195 |
| Q7TNG5 | Eml2     | 0.001 | 0.016 | 0.205  | -0.013 | 0.000  | -1.330 | -1.840 | -1.470 |
| Q924K8 | Mta3     | 0.030 | 0.114 | -0.251 | 0.006  | 0.000  | -0.565 | -0.629 | -0.314 |
| Q9QXY6 | Ehd3     | 0.016 | 0.079 | -0.307 | 0.000  | 0.187  | -0.555 | -0.968 | -0.899 |
| Q62167 | Ddx3x    | 0.437 | 0.694 | 0.572  | -0.079 | 0.000  | 0.360  | -0.179 | -0.557 |
| Q60996 | Ppp2r5c  | 0.122 | 0.280 | 0.000  | -0.686 | 0.064  | -0.519 | -1.030 | -0.730 |
| Q8BJY1 | Psm5     | 0.005 | 0.039 | 0.000  | -0.013 | 0.093  | -0.877 | -1.520 | -0.988 |
| Q61699 | Hsph1    | 0.043 | 0.141 | 0.078  | -0.155 | 0.000  | -0.310 | -1.080 | -0.742 |
| Q99K41 | Emilin1  | 0.416 | 0.670 | 0.000  | 0.316  | -1.210 | 0.517  | 0.065  | -0.112 |
| P62911 | Rpl32    | 0.562 | 0.831 | 0.000  | 0.444  | -0.453 | 0.516  | -0.354 | 0.583  |
| Q9CWX9 | Ddx47    | 0.062 | 0.178 | 0.000  | -0.105 | 0.012  | -0.508 | -1.220 | -0.386 |
| Q04207 | Rela     | 0.003 | 0.030 | 0.000  | -0.006 | 0.032  | -0.840 | -1.440 | -1.170 |
| B2RUP2 | Unc13d   | 0.001 | 0.019 | -0.112 | 0.000  | 0.027  | -0.618 | -0.760 | -0.569 |
| Q7TQK1 | Ints7    | 0.079 | 0.211 | -0.115 | 0.068  | 0.000  | -0.097 | -0.432 | -0.299 |
| P21278 | Gna11    | 0.000 | 0.008 | -0.109 | 0.262  | 0.000  | 3.110  | 2.800  | 3.100  |
| Q60605 | Myl6     | 0.043 | 0.141 | -0.374 | 0.009  | 0.000  | 0.591  | 0.152  | 0.570  |
| Q80T69 | Rsb1     | 0.064 | 0.183 | 0.000  | -0.349 | 0.070  | -0.907 | -0.869 | -0.298 |
| P09450 | Junb     | 0.437 | 0.694 | -0.450 | 0.000  | 0.615  | -0.225 | 0.461  | 1.360  |
| Q8VDD9 | Phip     | 0.465 | 0.724 | -0.464 | 0.000  | 0.167  | -0.384 | -0.642 | 0.057  |
| Q811D0 | Dlg1     | 0.287 | 0.512 | 0.849  | -0.648 | 0.000  | 0.548  | -2.010 | -1.710 |
| Q8K4B0 | Mta1     | 0.791 | 1.000 | 0.000  | -0.152 | 0.426  | 0.202  | -0.311 | 0.179  |
| P70280 | Vamp7    | 0.346 | 0.587 | -0.078 | 0.033  | 0.000  | 0.104  | -0.400 | -0.234 |
| Q9QZE7 | Tsnax    | 0.001 | 0.022 | 0.000  | 0.385  | -0.165 | -1.410 | -1.900 | -1.600 |
| Q8R3N1 | Nop14    | 0.332 | 0.570 | -0.160 | 0.000  | 0.304  | 0.053  | -0.677 | -0.095 |
| Q8BFP9 | Pdk1     | 0.386 | 0.634 | 0.043  | 0.000  | -0.101 | 0.101  | -0.625 | -0.165 |
| Q99P81 | Abcg3    | 0.243 | 0.453 | 0.251  | 0.000  | -0.027 | 0.093  | -0.358 | -0.158 |
| Q9CZ30 | Ola1     | 0.090 | 0.230 | 0.164  | 0.000  | -0.069 | -0.178 | -0.868 | -0.330 |
| Q6A0D4 | Rftn1    | 0.286 | 0.511 | 0.030  | 0.000  | -0.148 | -0.005 | -0.496 | -0.184 |
| Q99PP7 | Trim33   | 0.047 | 0.150 | -0.262 | 0.000  | 0.007  | -0.335 | -0.889 | -0.588 |
| Q99LM2 | Cdk5rap3 | 0.442 | 0.699 | 0.000  | -0.004 | 0.018  | 0.014  | -0.017 | 0.147  |
| Q6P1Y8 | Inpp4b   | 0.035 | 0.125 | -0.467 | 0.000  | 0.045  | -1.560 | -3.990 | -2.020 |
| O35604 | Npc1     | 0.052 | 0.160 | 0.406  | -0.105 | 0.000  | 0.918  | 0.427  | 0.686  |
| P25444 | Rps2     | 0.856 | 1.000 | 0.223  | -0.069 | 0.000  | 0.402  | -0.165 | 0.026  |
| Q8R2M2 | Dntip2   | 0.473 | 0.733 | -0.541 | 0.000  | 0.436  | -0.515 | -0.348 | -0.001 |
| Q3UMU9 | Hdgfrp2  | 0.090 | 0.230 | 0.082  | -0.189 | 0.000  | -0.315 | -2.380 | -1.430 |
| Q9JM76 | Arpc3    | 0.056 | 0.166 | 0.000  | -0.035 | 0.058  | 0.405  | 0.091  | 0.299  |
| Q9EQ20 | Aldh6a1  | 0.368 | 0.615 | 0.300  | 0.000  | -0.150 | 1.460  | -0.061 | 0.226  |
| O55135 | Eif6     | 0.023 | 0.096 | 0.057  | -0.012 | 0.000  | -0.371 | -0.879 | -1.130 |
| Q9Z0S1 | Bpnt1    | 0.290 | 0.515 | -1.300 | 0.000  | 0.199  | -3.920 | -2.080 | 0.204  |
| Q3UYV9 | Ncbp1    | 0.003 | 0.030 | -0.103 | 0.026  | 0.000  | -0.664 | -0.913 | -0.589 |
| Q8R0X7 | Sgpl1    | 0.003 | 0.033 | 0.000  | 0.081  | -0.094 | 1.270  | 0.727  | 1.060  |
| Q8K2M0 | Mrpl38   | 0.002 | 0.024 | 0.114  | 0.000  | -0.089 | 0.995  | 0.671  | 0.855  |
| P16125 | Ldhd     | 0.000 | 0.013 | -0.212 | 0.132  | 0.000  | -1.330 | -1.570 | -1.550 |
| Q9DC50 | Crot     | 0.119 | 0.276 | 0.000  | -0.124 | 0.034  | -0.050 | -0.367 | -0.340 |
| P62071 | Rras2    | 0.017 | 0.081 | 0.120  | 0.000  | -0.083 | 2.130  | 0.816  | 1.860  |
| Q80XU3 | Nucks1   | 0.047 | 0.149 | 0.000  | -0.362 | 0.201  | -0.682 | -2.200 | -1.300 |
| P23591 | Tsta3    | 0.050 | 0.155 | 0.000  | -0.683 | 0.362  | -0.877 | -1.760 | -2.630 |
| P97300 | Nptn     | 0.044 | 0.143 | -0.405 | 0.611  | 0.000  | 0.707  | 1.630  | 1.810  |

|        |          |       |       |        |        |        |        |        |        |
|--------|----------|-------|-------|--------|--------|--------|--------|--------|--------|
| Q9Z127 | Slc7a5   | 0.005 | 0.043 | 0.399  | 0.000  | -0.183 | 1.980  | 1.200  | 1.790  |
| G5E829 | Atp2b1   | 0.001 | 0.020 | -0.137 | 0.083  | 0.000  | 1.270  | 0.902  | 1.290  |
| O35435 | Dhodh    | 0.072 | 0.196 | 0.000  | 0.359  | -1.330 | 0.638  | 1.240  | 1.160  |
| Q9D7X8 | Ggct     | 0.001 | 0.019 | -0.269 | 0.000  | 0.357  | -2.090 | -1.980 | -2.600 |
| O35691 | Pnn      | 0.019 | 0.085 | -0.156 | 0.000  | 0.067  | -0.334 | -0.570 | -0.348 |
| Q91YU8 | Ppan     | 0.916 | 1.000 | -0.220 | 0.149  | 0.000  | 0.107  | -0.314 | 0.077  |
| Q9QXG4 | Acss2    | 0.016 | 0.078 | -0.138 | 0.694  | 0.000  | -1.240 | -2.430 | -1.330 |
| P40237 | Cd82     | 0.269 | 0.488 | -0.180 | 0.212  | 0.000  | -0.365 | -0.262 | 0.030  |
| Q922J3 | Clip1    | 0.034 | 0.122 | 0.415  | -0.534 | 0.000  | -1.450 | -1.440 | -0.712 |
| Q6P5B0 | Rrp12    | 0.301 | 0.529 | 0.369  | -0.321 | 0.000  | 0.174  | -0.805 | -0.596 |
| P21995 | Emb      | 0.102 | 0.247 | -0.018 | 0.022  | 0.000  | 0.401  | 0.018  | 0.398  |
| Q6P9J9 | Ano6     | 0.002 | 0.023 | 0.138  | 0.000  | -0.273 | 1.220  | 0.975  | 1.320  |
| Q8BUM3 | Ptpn7    | 0.004 | 0.038 | 0.125  | -0.871 | 0.000  | -2.120 | -2.240 | -1.970 |
| P50518 | Atp6v1e1 | 0.837 | 1.000 | 0.431  | 0.000  | -0.221 | 0.368  | -0.169 | 0.175  |
| Q8BYW1 | Arhgap25 | 0.003 | 0.033 | -0.351 | 0.267  | 0.000  | -1.140 | -1.230 | -1.400 |
| O88441 | Mtx2     | 0.276 | 0.496 | 0.000  | 0.113  | -0.108 | 0.703  | -0.135 | 0.393  |
| Q6P9Q4 | Fhod1    | 0.095 | 0.238 | 0.000  | 0.192  | -0.114 | -0.066 | -0.781 | -0.583 |
| Q9R0I7 | Ylpm1    | 0.058 | 0.171 | 0.000  | 0.437  | -0.223 | -0.318 | -0.631 | -0.534 |
| Q921N6 | Ddx27    | 0.244 | 0.454 | 0.486  | 0.000  | -0.037 | 0.216  | -0.895 | -0.357 |
| Q9Z1Z0 | Uso1     | 0.335 | 0.573 | 0.000  | 0.009  | -0.654 | 0.355  | -2.660 | -1.290 |
| Q8R127 | Sccpdh   | 0.064 | 0.183 | -0.667 | 0.216  | 0.000  | 0.428  | 0.527  | 0.710  |
| B1AZI6 | Thoc2    | 0.998 | 1.000 | 0.453  | -0.343 | 0.000  | -0.050 | -0.330 | 0.488  |
| Q18PI6 | Cd84     | 0.101 | 0.247 | -0.282 | 0.224  | 0.000  | -0.350 | -1.080 | -0.397 |
| Q8BY87 | Usp47    | 0.774 | 1.000 | -1.190 | 0.000  | 0.428  | -0.271 | -1.430 | 0.297  |
| Q8BJ03 | Cox15    | 0.015 | 0.075 | 0.000  | -0.638 | 0.346  | 1.240  | 1.100  | 1.810  |
| Q8R164 | Bphl     | 0.031 | 0.114 | 0.197  | 0.000  | -0.133 | 0.714  | 0.305  | 0.778  |
| Q3THG9 | Aarsd1   | 0.001 | 0.019 | -0.043 | 0.000  | 0.016  | -0.899 | -1.240 | -1.330 |
| Q920E5 | Fdps     | 0.104 | 0.252 | 1.020  | 0.000  | -0.336 | 1.880  | 0.878  | 1.120  |
| Q9JII5 | Dazap1   | 0.028 | 0.107 | 0.000  | 0.377  | -0.062 | -0.451 | -0.655 | -0.308 |
| Q8K003 | Tma7     | 0.203 | 0.399 | 0.000  | -0.024 | 0.550  | 0.396  | 0.384  | 0.845  |
| P28656 | Nap111   | 0.113 | 0.267 | 0.177  | -0.254 | 0.000  | -0.193 | -0.671 | -0.353 |
| Q9DAW6 | Prpf4    | 0.005 | 0.039 | 0.000  | 0.312  | -0.251 | -0.873 | -0.940 | -1.050 |
| Q3TW96 | Uap111   | 0.784 | 1.000 | -0.947 | 0.000  | 0.254  | 0.223  | -0.282 | -0.282 |
| Q62383 | Supt6h   | 0.838 | 1.000 | 0.314  | -0.950 | 0.000  | 0.804  | 0.583  | -1.490 |
| O09130 | Nfatc2ip | 0.031 | 0.115 | 0.000  | -0.134 | 0.049  | -0.815 | -2.260 | -1.240 |
| Q8VDM4 | Psm2     | 0.239 | 0.447 | 0.042  | -0.316 | 0.000  | -0.103 | -0.642 | -0.329 |
| Q9DBF1 | Aldh7a1  | 0.000 | 0.009 | 0.000  | 0.318  | -0.191 | 2.700  | 2.460  | 2.520  |
| Q99MR8 | Mccc1    | 0.382 | 0.631 | 0.014  | 0.000  | -0.317 | 0.811  | -0.251 | 0.108  |
| Q6ZQB6 | Ppip5k2  | 0.003 | 0.033 | 0.000  | 0.042  | -0.056 | -0.461 | -0.578 | -0.345 |
| P28063 | Psm8     | 0.001 | 0.014 | -0.160 | 0.000  | 0.024  | -1.350 | -1.790 | -1.440 |
| P11438 | Lamp1    | 0.050 | 0.156 | 0.166  | -0.304 | 0.000  | 0.879  | 0.236  | 0.715  |
| Q60790 | Rasa3    | 0.846 | 1.000 | 0.000  | 0.108  | -0.282 | 0.257  | -0.193 | -0.123 |
| Q9CY97 | Ssu72    | 0.032 | 0.118 | -0.131 | 0.000  | 0.023  | -0.703 | -1.630 | -0.740 |
| Q925I1 | Atad3    | 0.245 | 0.456 | 0.000  | 0.064  | -0.526 | 0.689  | -0.048 | 0.094  |
| Q8R149 | Bud13    | 0.404 | 0.655 | 0.211  | -0.128 | 0.000  | 0.438  | -0.129 | -5.790 |
| Q8BJ05 | Zc3h14   | 0.250 | 0.462 | 0.000  | -0.321 | 0.346  | -1.400 | -0.546 | 0.077  |
| Q8BG05 | Hnrnpa3  | 0.572 | 0.842 | 0.000  | 0.531  | -0.203 | -0.478 | -0.064 | 0.294  |
| Q9WVL0 | Gstz1    | 0.112 | 0.265 | 0.000  | 0.163  | -0.024 | 1.190  | 0.487  | 0.239  |
| Q9DB25 | Alg5     | 0.009 | 0.058 | 0.000  | -0.448 | 0.027  | 0.870  | 0.529  | 0.843  |
| O55143 | Atp2a2   | 0.001 | 0.018 | 0.000  | 0.045  | -0.311 | 1.460  | 1.100  | 1.270  |
| Q6QD59 | Bnip1    | 0.831 | 1.000 | 0.000  | -0.712 | 0.039  | -0.271 | -0.640 | 0.026  |
| P56376 | Acyp1    | 0.087 | 0.224 | 0.000  | -0.217 | 0.506  | -0.816 | -1.530 | -0.252 |
| P58771 | Tpm1     | 0.375 | 0.623 | 0.000  | 0.208  | -0.022 | 0.058  | -0.868 | 0.051  |
| Q7TNC4 | Luc7l2   | 0.063 | 0.180 | 0.454  | -0.011 | 0.000  | -0.152 | -1.330 | -1.050 |
| Q922H2 | Pdk3     | 0.193 | 0.385 | 0.065  | 0.000  | -0.219 | 0.781  | -0.001 | 0.229  |
| Q9CQJ6 | Denr     | 0.330 | 0.568 | 0.249  | -0.263 | 0.000  | 0.475  | -0.043 | 0.254  |
| Q00612 | G6pdx    | 0.184 | 0.373 | 1.060  | -0.237 | 0.000  | 0.116  | -0.895 | -0.924 |
| P29452 | Casp1    | 0.002 | 0.027 | -0.321 | 0.027  | 0.000  | -1.120 | -1.610 | -1.380 |
| O54957 | Lat      | 0.507 | 0.771 | -0.255 | 0.567  | 0.000  | 0.081  | 0.134  | 0.862  |

|        |          |       |       |        |        |        |        |        |        |
|--------|----------|-------|-------|--------|--------|--------|--------|--------|--------|
| Q05117 | Acp5     | 0.229 | 0.433 | 0.477  | 0.000  | -0.821 | -0.165 | -0.959 | -1.720 |
| Q3TzM9 | Alg11    | 0.001 | 0.021 | 0.265  | 0.000  | -0.147 | 1.390  | 1.080  | 1.260  |
| Q6ZQ03 | Fnbp4    | 0.001 | 0.017 | 0.000  | -0.040 | 0.153  | -0.833 | -1.160 | -1.090 |
| Q99J62 | Rfc4     | 0.246 | 0.457 | 0.532  | -0.054 | 0.000  | 0.414  | -0.865 | -1.300 |
| Q9CQU3 | Rer1     | 0.001 | 0.015 | 0.049  | 0.000  | -0.033 | 0.920  | 0.802  | 1.120  |
| P56812 | Pdcd5    | 0.007 | 0.049 | -0.173 | 0.137  | 0.000  | -1.160 | -1.590 | -0.851 |
| Q5SVQ0 | Kat7     | 0.002 | 0.025 | -0.004 | 0.000  | 0.180  | -0.725 | -1.080 | -0.767 |
| Q8BGT7 | Smndc1   | 0.168 | 0.349 | -0.203 | 0.000  | 0.691  | -1.140 | -1.620 | 0.190  |
| Q08481 | Pecam1   | 0.631 | 0.907 | 0.000  | 1.060  | -0.637 | -0.841 | 0.355  | -0.038 |
| Q4VAA2 | Cdv3     | 0.723 | 1.000 | 0.000  | -0.140 | 0.131  | 0.438  | -0.344 | 0.172  |
| P61087 | Ube2k    | 0.014 | 0.072 | 0.193  | 0.000  | -0.032 | -0.552 | -1.380 | -1.130 |
| P59114 | Pcif1    | 0.284 | 0.508 | 0.000  | -0.966 | 0.255  | -0.704 | -2.550 | -0.344 |
| Q6PAM1 | Txlna    | 0.425 | 0.679 | 0.512  | -0.234 | 0.000  | 1.380  | 0.111  | 0.072  |
| Q9EPL8 | Ipo7     | 0.513 | 0.776 | 0.430  | -0.700 | 0.000  | 0.125  | -1.260 | -0.270 |
| Q9JMA2 | Qtrt1    | 0.001 | 0.019 | 0.000  | 0.059  | -0.158 | -0.700 | -0.758 | -0.891 |
| Q640N3 | Arhgap30 | 0.048 | 0.151 | -0.074 | 0.000  | 0.135  | -0.461 | -1.900 | -1.130 |
| P41241 | Csk      | 0.102 | 0.248 | 0.002  | 0.000  | -0.016 | -0.072 | -0.837 | -0.511 |
| Q3UBX0 | Tmem109  | 0.186 | 0.376 | 0.000  | -4.730 | 0.023  | 0.839  | 0.983  | 1.030  |
| Q8R146 | Apeh     | 0.003 | 0.031 | -0.048 | 0.000  | 0.071  | -1.000 | -1.700 | -1.640 |
| Q8R0L9 | Tada3    | 0.199 | 0.394 | -0.089 | 0.639  | 0.000  | -0.084 | -0.212 | -0.232 |
| Q6P9N1 | Fam126a  | 0.432 | 0.687 | -0.621 | 2.050  | 0.000  | 0.332  | 1.680  | 1.890  |
| Q8VCX5 | Micu1    | 0.567 | 0.836 | -0.165 | 0.177  | 0.000  | 1.300  | -0.698 | 0.513  |
| Q99JW4 | Lims1    | 0.478 | 0.740 | 0.000  | 0.120  | -0.598 | 0.349  | -0.126 | -0.073 |
| Q6ZWR6 | Syne1    | 0.727 | 1.000 | 0.859  | -1.990 | 0.000  | 0.386  | 0.188  | -0.688 |
| Q99M87 | Dnaja3   | 0.029 | 0.112 | 0.003  | 0.000  | -0.329 | 0.713  | 0.216  | 0.625  |
| Q80SU7 | Gvin1    | 0.117 | 0.273 | 0.231  | 0.000  | -0.019 | 0.045  | -0.881 | -0.733 |
| B2RY04 | Dock5    | 0.009 | 0.057 | -0.206 | 0.037  | 0.000  | -0.766 | -1.150 | -0.647 |
| Q5SUF2 | Luc7l3   | 0.021 | 0.091 | 0.264  | 0.000  | -0.087 | -0.609 | -1.770 | -1.470 |
| Q09200 | B4galnt1 | 0.004 | 0.036 | 0.052  | -0.019 | 0.000  | -0.568 | -0.695 | -0.380 |
| Q06138 | Cab39    | 0.004 | 0.036 | 0.105  | -0.146 | 0.000  | -0.761 | -1.280 | -1.010 |
| Q9D379 | Ephx1    | 0.000 | 0.012 | 0.114  | -0.040 | 0.000  | 1.700  | 1.320  | 1.580  |
| Q9JIF7 | Copb1    | 0.018 | 0.084 | 0.000  | 0.412  | -0.073 | -0.488 | -1.040 | -1.230 |
| Q9ESE1 | Lrba     | 0.000 | 0.013 | -0.292 | 0.080  | 0.000  | -1.440 | -1.500 | -1.340 |
| Q9CQ40 | Mrpl49   | 0.092 | 0.233 | 0.339  | 0.000  | -0.837 | 0.637  | 0.883  | 0.445  |
| O08573 | Lgals9   | 0.391 | 0.640 | 0.475  | 0.000  | -0.125 | 0.251  | -0.413 | -0.271 |
| Q6PR54 | Rif1     | 0.046 | 0.148 | 0.000  | -0.091 | 0.018  | -0.254 | -0.829 | -0.460 |
| Q9ESV0 | Ddx24    | 0.175 | 0.360 | 0.000  | 0.189  | -0.128 | 0.133  | -1.170 | -0.925 |
| Q8CIM8 | Ints4    | 0.007 | 0.048 | -0.070 | 0.095  | 0.000  | -0.300 | -0.542 | -0.502 |
| Q6P6J9 | Txndc15  | 0.896 | 1.000 | 0.417  | 0.000  | -1.790 | -0.136 | -1.240 | 0.342  |
| Q8VBW6 | Nae1     | 0.028 | 0.108 | -0.019 | 0.000  | 0.206  | -0.776 | -2.140 | -1.120 |
| Q3TGF2 | Fam107b  | 0.166 | 0.347 | 0.000  | -0.310 | 0.205  | -0.458 | -0.714 | -0.106 |
| P50171 | Hsd17b8  | 0.804 | 1.000 | -0.055 | 0.000  | 0.133  | 0.345  | -0.437 | -0.015 |
| Q68FL4 | Ahcyl2   | 0.099 | 0.244 | 0.091  | -0.030 | 0.000  | -0.016 | -0.637 | -0.577 |
| Q60960 | Kpna1    | 0.132 | 0.296 | 0.000  | 0.990  | -0.334 | -1.180 | -0.338 | -0.508 |
| Q6PD26 | Pigs     | 0.001 | 0.020 | 0.000  | 0.161  | -0.055 | 0.792  | 0.665  | 0.633  |
| P62267 | Rps23    | 0.689 | 0.965 | 0.013  | -0.028 | 0.000  | 0.271  | -0.356 | 0.363  |
| P16675 | Ctsa     | 0.839 | 1.000 | 0.308  | 0.000  | -0.004 | 1.220  | -0.818 | -0.515 |
| Q8R3F5 | Mcat     | 0.181 | 0.368 | 0.020  | 0.000  | -0.178 | 0.816  | -0.052 | 0.333  |
| Q9DCN2 | Cyb5r3   | 0.000 | 0.005 | 0.000  | 0.161  | -0.051 | 2.080  | 1.950  | 2.120  |
| O08550 | Kmt2b    | 0.024 | 0.100 | 0.000  | -0.032 | 0.324  | -0.352 | -0.570 | -0.287 |
| Q9DB15 | Mrpl12   | 0.006 | 0.044 | 0.000  | 0.110  | -0.240 | 0.803  | 0.551  | 0.609  |
| Q921L3 | Tmco1    | 0.013 | 0.070 | 0.210  | 0.000  | -0.647 | 1.070  | 1.350  | 0.878  |
| Q99NB1 | Acss1    | 0.101 | 0.247 | 0.000  | 0.064  | -0.261 | -0.149 | -0.573 | -0.593 |
| Q9EQI8 | Mrpl46   | 0.017 | 0.081 | 0.194  | 0.000  | -0.083 | 1.000  | 0.471  | 0.691  |
| Q8R574 | Prpsap2  | 0.015 | 0.076 | 0.000  | -0.221 | 0.127  | -0.692 | -1.420 | -0.898 |
| O35639 | Anxa3    | 0.011 | 0.063 | 0.503  | 0.000  | -0.324 | 1.340  | 1.040  | 1.270  |
| Q9WVJ3 | Cpq      | 0.146 | 0.315 | 0.375  | 0.000  | -0.250 | -0.094 | -0.745 | -0.448 |
| Q68FH4 | Galk2    | 0.009 | 0.056 | 0.000  | 0.100  | -0.032 | -0.657 | -1.280 | -0.781 |
| Q8C163 | Exog     | 0.071 | 0.194 | -0.225 | 0.654  | 0.000  | 0.703  | 0.765  | 1.070  |

|        |         |       |       |        |        |        |        |        |        |
|--------|---------|-------|-------|--------|--------|--------|--------|--------|--------|
| O35609 | Scamp3  | 0.623 | 0.898 | -0.255 | 0.000  | 0.047  | -0.117 | -0.199 | -0.056 |
| P03930 | Mtntp8  | 0.027 | 0.105 | -0.070 | 0.024  | 0.000  | 0.738  | 0.252  | 0.830  |
| P62270 | Rps18   | 0.436 | 0.693 | 0.154  | -0.073 | 0.000  | 0.130  | -0.385 | -0.087 |
| Q80UM7 | Mogs    | 0.021 | 0.090 | 0.000  | 0.122  | -0.001 | 0.478  | 0.248  | 0.578  |
| Q8C1B7 | Sept 11 | 0.137 | 0.302 | -0.140 | 0.191  | 0.000  | 0.444  | 0.081  | 0.326  |
| Q80X82 | Sympk   | 0.294 | 0.522 | 0.000  | 1.070  | -0.036 | -0.491 | -0.519 | 0.363  |
| Q5U458 | Dnajc11 | 0.066 | 0.185 | 0.771  | -0.042 | 0.000  | 1.780  | 1.580  | 0.657  |
| P97311 | Mcm6    | 0.032 | 0.116 | 0.272  | -0.017 | 0.000  | -0.280 | -1.070 | -0.927 |
| Q8VDJ3 | Hdlbp   | 0.079 | 0.209 | 0.211  | 0.000  | -0.388 | 1.260  | 0.312  | 0.588  |
| Q61292 | Lamb2   | 0.013 | 0.070 | 0.471  | -3.200 | 0.000  | 4.150  | 3.830  | 4.190  |
| O08600 | Endog   | 0.058 | 0.171 | -0.172 | 0.406  | 0.000  | -0.439 | -0.313 | -0.402 |
| Q9ER00 | Stx12   | 0.134 | 0.298 | 0.205  | 0.000  | -1.040 | 1.720  | -0.121 | 1.470  |
| Q61263 | Soat1   | 0.202 | 0.397 | -1.560 | 0.617  | 0.000  | 0.381  | 0.756  | 1.000  |
| P08030 | Aprt    | 0.013 | 0.071 | 0.398  | -0.078 | 0.000  | -0.482 | -0.881 | -0.702 |
| O35459 | Ech1    | 0.045 | 0.146 | 0.000  | 0.120  | -0.262 | 0.291  | 0.279  | 0.264  |
| P47968 | Rpia    | 0.160 | 0.337 | 0.718  | -0.577 | 0.000  | -0.741 | -2.220 | -0.389 |
| Q91XD7 | Creld1  | 0.012 | 0.067 | 0.000  | 0.730  | -0.301 | 1.590  | 1.500  | 2.140  |
| Q6ZPQ6 | Pitpnm2 | 0.007 | 0.048 | -0.296 | 0.000  | 0.192  | -0.918 | -1.170 | -0.791 |
| Q924C1 | Xpo5    | 0.198 | 0.392 | 0.232  | 0.000  | -0.052 | 0.150  | -1.420 | -0.684 |
| Q8VDC0 | Lars2   | 0.390 | 0.640 | 0.288  | 0.000  | -4.090 | 0.945  | -0.292 | -0.213 |
| Q8CEC6 | Ppwd1   | 0.002 | 0.025 | 0.000  | 0.104  | -0.053 | -0.865 | -0.835 | -0.565 |
| Q8K021 | Scamp1  | 0.737 | 1.000 | 0.000  | 0.045  | -0.281 | -0.544 | -0.201 | 1.040  |
| P62908 | Rps3    | 0.186 | 0.376 | 0.099  | 0.000  | -0.178 | -0.074 | -0.632 | -0.252 |
| Q497V5 | Srbd1   | 0.629 | 0.904 | 0.000  | -0.755 | 0.097  | -0.082 | -0.855 | -0.278 |
| P34022 | Ranbp1  | 0.071 | 0.195 | 0.406  | -0.097 | 0.000  | -0.243 | -1.450 | -0.795 |
| Q9CRA8 | Exosc5  | 0.006 | 0.046 | -0.019 | 0.000  | 0.245  | -0.631 | -0.827 | -0.461 |
| Q8K2X3 | Obfc1   | 0.025 | 0.101 | -0.192 | 0.301  | 0.000  | -0.567 | -1.010 | -0.532 |
| Q3UHB1 | Nt5dc3  | 0.001 | 0.014 | 0.000  | 0.448  | -0.077 | 2.160  | 2.160  | 2.560  |
| Q9ESU6 | Brd4    | 0.610 | 0.884 | 0.000  | 0.102  | -0.420 | -0.365 | -0.366 | 0.059  |
| Q60775 | Elf1    | 0.189 | 0.380 | -0.298 | 0.000  | 0.179  | -0.917 | -2.490 | -0.101 |
| Q9JJK2 | Lancl2  | 0.097 | 0.240 | 0.477  | -0.052 | 0.000  | -0.074 | -0.884 | -0.483 |
| Q80YW0 | Cyth4   | 0.013 | 0.070 | 0.000  | -0.147 | 0.123  | -0.448 | -0.948 | -0.724 |
| Q9CWW7 | Cxxc1   | 0.381 | 0.630 | -0.019 | 0.834  | 0.000  | -0.213 | 0.075  | 0.075  |
| Q9DCJ5 | Ndufa8  | 0.075 | 0.202 | 0.000  | 1.300  | -0.142 | 1.220  | 1.620  | 2.010  |
| O08529 | Capn2   | 0.746 | 1.000 | -0.207 | 0.000  | 0.072  | 0.305  | -0.569 | -0.147 |
| Q9D020 | Nt5c3a  | 0.008 | 0.053 | 0.000  | 0.443  | -0.151 | -0.917 | -1.350 | -0.880 |
| Q62393 | Tpd52   | 0.002 | 0.027 | 0.298  | -0.017 | 0.000  | -0.642 | -0.624 | -0.600 |
| Q9Z0H4 | Celf2   | 0.075 | 0.202 | -0.319 | 0.000  | 0.094  | -0.466 | -0.487 | -0.283 |
| Q8VDP3 | Mical1  | 0.105 | 0.252 | -0.304 | 0.256  | 0.000  | -0.186 | -1.030 | -1.600 |
| Q921G7 | Etfdh   | 0.009 | 0.055 | 0.011  | 0.000  | -0.217 | 0.785  | 0.394  | 0.573  |
| Q9JHS4 | Clpx    | 0.557 | 0.825 | 0.335  | 0.000  | -0.328 | 1.540  | -0.635 | 0.363  |
| Q8BK72 | Mrps27  | 0.012 | 0.068 | 0.000  | 0.528  | -0.256 | 1.200  | 1.050  | 1.510  |
| O70475 | Ugdh    | 0.023 | 0.096 | 0.529  | 0.000  | -0.191 | 2.030  | 0.941  | 1.470  |
| Q93092 | Taldo1  | 0.006 | 0.044 | 0.013  | 0.000  | -0.200 | -1.010 | -1.870 | -1.490 |
| O70293 | Grk6    | 0.047 | 0.150 | 0.170  | -0.136 | 0.000  | -0.401 | -1.250 | -0.613 |
| Q99LH1 | Gnl2    | 0.400 | 0.651 | -0.012 | 0.347  | 0.000  | 0.181  | 0.019  | -0.682 |
| Q03347 | Runx1   | 0.085 | 0.221 | -0.073 | 0.000  | 0.462  | -0.343 | -0.360 | -0.146 |
| Q9DBR1 | Xrn2    | 0.619 | 0.893 | 0.182  | -3.030 | 0.000  | -0.079 | -0.512 | -0.558 |
| Q8BVQ5 | Ppme1   | 0.046 | 0.149 | 0.000  | -0.304 | 0.094  | -0.600 | -2.320 | -1.730 |
| P58389 | Ppp2r4  | 0.004 | 0.035 | 0.000  | 0.159  | -0.258 | -0.987 | -1.580 | -1.380 |
| Q9D7S7 | Rpl22l1 | 0.056 | 0.168 | 0.639  | -0.126 | 0.000  | 1.190  | 0.683  | 0.870  |
| Q9CQI3 | Gmfb    | 0.027 | 0.105 | -0.614 | 0.344  | 0.000  | -1.170 | -1.820 | -1.060 |
| Q6P8X1 | Snx6    | 0.080 | 0.211 | 0.179  | -0.169 | 0.000  | -0.355 | -1.340 | -0.535 |
| Q922S4 | Pde2a   | 0.073 | 0.199 | 0.280  | -0.058 | 0.000  | -0.909 | -2.760 | -0.790 |
| Q9Z2W0 | Dnpep   | 0.888 | 1.000 | -0.137 | 0.062  | 0.000  | 0.083  | -0.199 | 0.092  |
| Q6ZPR5 | Smpd4   | 0.671 | 0.948 | -0.120 | 0.000  | 0.029  | 0.054  | -0.374 | 0.028  |
| Q8R0F5 | Rbmx2   | 0.033 | 0.119 | 0.125  | 0.000  | -0.033 | -0.510 | -1.190 | -0.479 |
| Q62186 | Ssr4    | 0.004 | 0.036 | 0.000  | 0.264  | -0.140 | 1.460  | 1.390  | 2.160  |
| Q8BFZ3 | Actbl2  | 0.527 | 0.794 | 0.000  | -1.890 | 1.230  | -0.488 | 0.989  | 0.984  |

|        |          |       |       |        |        |        |        |        |        |
|--------|----------|-------|-------|--------|--------|--------|--------|--------|--------|
| P48962 | Slc25a4  | 0.000 | 0.013 | 0.000  | 0.359  | -0.136 | 2.120  | 1.860  | 2.070  |
| P14234 | Fgr      | 0.214 | 0.412 | 0.781  | 0.000  | -0.781 | -0.032 | -1.290 | -1.570 |
| Q61805 | Lbp      | 0.929 | 1.000 | 1.500  | 0.000  | -0.715 | 0.961  | -0.240 | -0.151 |
| Q8K3H0 | App1     | 0.122 | 0.280 | -0.019 | 0.000  | 0.087  | 0.005  | -0.899 | -0.625 |
| Q9CQU0 | Txndc12  | 0.033 | 0.119 | 0.153  | -0.268 | 0.000  | 0.484  | 0.520  | 1.080  |
| Q9D2H6 | Sp2      | 0.814 | 1.000 | -0.748 | 0.000  | 0.314  | -0.304 | -0.704 | 0.256  |
| Q9Z183 | Padi4    | 0.348 | 0.589 | 0.465  | -0.149 | 0.000  | 0.230  | -0.725 | -0.248 |
| Q6ZPZ3 | Zc3h4    | 0.051 | 0.157 | 0.058  | -0.071 | 0.000  | -0.559 | -1.210 | -0.369 |
| Q9CQX2 | Cyb5b    | 0.013 | 0.071 | -0.164 | 0.064  | 0.000  | 0.975  | 0.423  | 0.947  |
| P30412 | Ppic     | 0.000 | 0.004 | 0.211  | 0.000  | -0.045 | 4.510  | 4.650  | 5.030  |
| Q8R1V4 | Tmed4    | 0.003 | 0.033 | 0.009  | 0.000  | -0.106 | 0.740  | 0.516  | 0.912  |
| Q02257 | Jup      | 0.002 | 0.027 | -0.066 | 0.000  | 0.472  | 1.290  | 1.510  | 1.590  |
| Q8CG46 | Smc5     | 0.067 | 0.188 | 0.000  | -0.111 | 0.174  | -0.168 | -0.552 | -0.273 |
| P42232 | Stat5b   | 0.007 | 0.048 | -0.226 | 0.000  | 0.150  | -0.984 | -1.490 | -0.914 |
| P55200 | Kmt2a    | 0.043 | 0.142 | -0.334 | 0.008  | 0.000  | -0.582 | -1.070 | -0.506 |
| Q91W98 | Slc15a4  | 0.614 | 0.889 | 0.885  | -1.730 | 0.000  | 0.497  | -0.217 | 0.175  |
| Q9CPQ3 | Tomm22   | 0.010 | 0.061 | -0.029 | 0.000  | 0.186  | 1.040  | 0.523  | 0.946  |
| Q8C147 | Dock8    | 0.007 | 0.050 | -0.108 | 0.071  | 0.000  | -0.609 | -1.200 | -0.943 |
| Q9R1T2 | Sae1     | 0.001 | 0.022 | -0.100 | 0.000  | 0.086  | -1.310 | -1.900 | -1.410 |
| Q8BFQ4 | Wdr82    | 0.490 | 0.754 | -0.084 | 1.340  | 0.000  | -0.615 | -2.410 | 1.500  |
| P70349 | Hint1    | 0.003 | 0.030 | -0.064 | 0.000  | 0.148  | -1.010 | -1.670 | -1.260 |
| Q9D2M8 | Ube2v2   | 0.013 | 0.069 | -0.093 | 0.000  | 0.331  | -0.566 | -1.180 | -0.850 |
| O70318 | Epb4112  | 0.014 | 0.073 | 0.087  | -0.042 | 0.000  | 1.630  | 0.720  | 1.050  |
| P70335 | Rock1    | 0.917 | 1.000 | -0.464 | 0.059  | 0.000  | 0.136  | -0.564 | 0.117  |
| Q8BWy3 | Etf1     | 0.036 | 0.125 | 0.100  | -0.068 | 0.000  | -0.716 | -1.340 | -0.441 |
| Q01405 | Sec23a   | 0.212 | 0.409 | 0.000  | -0.038 | 0.008  | 0.653  | -0.087 | 0.364  |
| Q9D287 | Bcas2    | 0.044 | 0.145 | -0.673 | 0.000  | 0.145  | -1.230 | -1.000 | -0.769 |
| P70224 | Gimap1   | 0.037 | 0.127 | -0.253 | 0.025  | 0.000  | -0.508 | -0.642 | -0.305 |
| Q6ZQ08 | Cnot1    | 0.189 | 0.380 | 0.131  | 0.000  | -0.006 | 0.096  | -0.868 | -0.442 |
| Q9D1M0 | Sec13    | 0.774 | 1.000 | 0.000  | 0.076  | -0.324 | -0.229 | 0.354  | -0.169 |
| P18155 | Mthfd2   | 0.034 | 0.122 | 0.000  | 0.357  | -0.941 | 0.795  | 1.290  | 1.380  |
| O70546 | Kdm6a    | 0.111 | 0.263 | 0.014  | -0.113 | 0.000  | -0.286 | -0.636 | -0.129 |
| P70697 | Urod     | 0.023 | 0.096 | 0.306  | 0.000  | -0.652 | -1.230 | -2.010 | -1.240 |
| Q9QYJ3 | Dnajb1   | 0.023 | 0.096 | 0.060  | 0.000  | -0.117 | -0.733 | -1.600 | -0.788 |
| P26323 | Fli1     | 0.274 | 0.494 | 0.000  | -0.113 | 0.253  | 0.070  | -0.670 | -0.183 |
| Q9DCZ4 | Apoo     | 0.004 | 0.037 | 0.000  | 0.124  | -0.197 | 0.733  | 0.566  | 0.860  |
| P15920 | Atp6v0a2 | 0.003 | 0.033 | 0.000  | 0.059  | -0.066 | 0.643  | 0.434  | 0.744  |
| Q61466 | Smarcd1  | 0.126 | 0.287 | -0.202 | 0.000  | 0.061  | -0.260 | -0.833 | -0.252 |
| Q8BSQ9 | Pbrm1    | 0.031 | 0.114 | 0.000  | 0.231  | -0.058 | -0.850 | -1.020 | -0.291 |
| Q9QVP9 | Ptk2b    | 0.038 | 0.131 | -1.180 | 0.133  | 0.000  | -1.480 | -1.840 | -1.650 |
| P62996 | Tra2b    | 0.066 | 0.186 | 0.283  | -0.028 | 0.000  | -0.167 | -0.937 | -1.350 |
| O88890 | Sh2d1a   | 0.185 | 0.374 | -0.831 | 0.461  | 0.000  | -2.030 | -0.784 | -0.473 |
| Q8CHI8 | Ep400    | 0.615 | 0.889 | -2.080 | 0.000  | 0.300  | -0.174 | -0.489 | 0.144  |
| Q8K2H4 | Acap1    | 0.037 | 0.129 | -0.174 | 0.000  | 0.030  | -0.286 | -0.504 | -0.266 |
| Q8BWU5 | Osgep    | 0.031 | 0.114 | 0.000  | 0.021  | -0.337 | -1.120 | -2.230 | -0.990 |
| Q9DCM0 | Ethe1    | 0.636 | 0.912 | 0.000  | 0.137  | -0.820 | 0.135  | -0.445 | 0.180  |
| Q99N93 | Mrpl16   | 0.172 | 0.355 | 0.000  | 0.020  | -0.274 | 0.737  | -0.068 | 0.326  |
| Q91WQ5 | Taf5l    | 0.070 | 0.193 | -0.572 | 0.072  | 0.000  | -0.475 | -1.060 | -0.998 |
| Q78XF5 | Ostc     | 0.000 | 0.012 | 0.000  | 0.306  | -0.226 | 2.330  | 2.190  | 2.510  |
| P62897 | Cyca     | 0.205 | 0.401 | 0.000  | 0.081  | -0.533 | -0.300 | -0.469 | -0.708 |
| Q9CXE7 | Tmed5    | 0.012 | 0.068 | 0.000  | 0.150  | -0.065 | 0.610  | 0.334  | 0.624  |
| Q8BWG8 | Arrb1    | 0.003 | 0.032 | 0.094  | 0.000  | -0.186 | -0.771 | -1.060 | -0.747 |
| Q6NVG1 | Lpcat4   | 0.557 | 0.825 | 1.640  | -0.603 | 0.000  | 0.733  | -2.380 | 0.392  |
| P97352 | S100a13  | 0.076 | 0.205 | 0.121  | -0.269 | 0.000  | -0.471 | -1.150 | -0.410 |
| Q61990 | Pcbp2    | 0.167 | 0.348 | 0.037  | 0.000  | -0.006 | -0.016 | -0.517 | -0.184 |
| O35598 | Adam10   | 0.952 | 1.000 | 0.337  | 0.000  | -0.128 | 0.350  | -0.150 | 0.048  |
| P54729 | Nub1     | 0.979 | 1.000 | 0.840  | 0.000  | -0.638 | 1.160  | 0.303  | -1.330 |
| P84089 | Erh      | 0.027 | 0.107 | -0.352 | 0.000  | 0.217  | -1.060 | -2.580 | -1.450 |
| Q8BQ47 | Cnpy4    | 0.431 | 0.687 | -0.487 | 0.000  | 0.258  | -1.090 | -0.890 | 0.397  |

|        |          |       |       |        |        |        |        |        |        |
|--------|----------|-------|-------|--------|--------|--------|--------|--------|--------|
| P13379 | Cd5      | 0.724 | 1.000 | 0.000  | 0.432  | -2.100 | -0.529 | -0.610 | 0.443  |
| P31786 | Dbi      | 0.001 | 0.019 | 0.000  | 0.100  | -0.167 | -1.290 | -1.720 | -1.290 |
| P16045 | Lgals1   | 0.944 | 1.000 | 0.000  | 1.160  | -0.293 | 0.381  | 0.217  | 0.367  |
| Q9WUK2 | Eif4h    | 0.613 | 0.888 | 0.000  | -0.268 | 0.057  | -0.012 | -0.659 | 0.052  |
| P97821 | Ctsc     | 0.036 | 0.126 | 0.633  | -0.023 | 0.000  | -0.313 | -1.010 | -0.904 |
| P63325 | Rps10    | 0.296 | 0.524 | 0.877  | 0.000  | -0.932 | 1.130  | 0.005  | 1.120  |
| Q9R045 | Angptl2  | 0.066 | 0.186 | 0.000  | 1.160  | -3.870 | 3.180  | 2.590  | 3.020  |
| Q91WM3 | Rrp9     | 0.048 | 0.152 | 0.000  | -0.070 | 0.006  | -0.208 | -0.689 | -0.376 |
| P97370 | Atp1b3   | 0.009 | 0.056 | 0.000  | 0.096  | -0.048 | 0.414  | 0.419  | 0.703  |
| P62751 | Rpl23a   | 0.082 | 0.216 | 0.090  | -0.198 | 0.000  | 0.425  | 0.101  | 0.242  |
| Q9D0B0 | Srsf9    | 0.011 | 0.066 | 0.020  | 0.000  | -0.159 | -0.652 | -1.270 | -0.798 |
| Q9R062 | Gyg1     | 0.243 | 0.454 | 0.654  | 0.000  | -0.020 | 0.224  | -0.695 | -0.316 |
| Q921I1 | Tf       | 0.819 | 1.000 | 0.000  | -0.479 | 0.122  | 0.389  | -0.261 | -0.276 |
| Q9DAT2 | Mrgbp    | 0.207 | 0.404 | -0.081 | 0.000  | 0.111  | -0.097 | -1.350 | -0.296 |
| Q9R1E0 | Foxo1    | 0.005 | 0.039 | -0.131 | 0.075  | 0.000  | -0.360 | -0.460 | -0.388 |
| Q9WTR1 | Trpv2    | 0.227 | 0.430 | 0.000  | 0.025  | -0.046 | 0.378  | -0.095 | 0.370  |
| Q80TG1 | Kansl1   | 0.986 | 1.000 | -1.300 | 0.000  | 0.119  | -0.573 | -0.707 | 0.071  |
| O70194 | Eif3d    | 0.591 | 0.864 | 0.071  | 0.000  | -0.109 | 0.166  | -0.463 | -0.074 |
| Q99LR1 | Abhd12   | 0.002 | 0.026 | 0.137  | 0.000  | -0.385 | 1.300  | 1.020  | 1.320  |
| P97310 | Mcm2     | 0.021 | 0.090 | 0.214  | -0.065 | 0.000  | -0.388 | -1.080 | -0.810 |
| Q62095 | Ddx3y    | 0.466 | 0.724 | 0.597  | -0.003 | 0.000  | 0.486  | -0.267 | -0.483 |
| Q9JLI6 | Scly     | 0.000 | 0.013 | -0.263 | 0.000  | 0.067  | -1.830 | -1.890 | -1.550 |
| P26645 | Marcks   | 0.049 | 0.154 | 0.063  | 0.000  | -0.390 | 2.040  | 0.474  | 1.140  |
| Q3UKJ7 | Smu1     | 0.022 | 0.095 | -0.083 | 0.468  | 0.000  | -0.675 | -0.709 | -0.392 |
| Q9DCU6 | Mrpl4    | 0.041 | 0.138 | 0.000  | 0.039  | -0.885 | 0.969  | 0.968  | 0.394  |
| Q9ERL7 | Gmfg     | 0.000 | 0.011 | 0.000  | 0.112  | -0.049 | -1.510 | -1.900 | -1.610 |
| Q8R180 | Ero1a    | 0.132 | 0.296 | 0.317  | 0.000  | -0.244 | 0.636  | 0.184  | 0.436  |
| Q8K190 | Saysd1   | 0.726 | 1.000 | -0.379 | 0.000  | 0.155  | -0.127 | -0.154 | 0.302  |
| E9Q1P8 | Irf2bp2  | 0.832 | 1.000 | 0.177  | 0.000  | -0.061 | -0.107 | -0.185 | 0.296  |
| Q99KU0 | Vmp1     | 0.001 | 0.018 | 0.000  | 0.098  | -0.354 | 1.510  | 1.260  | 1.280  |
| Q8R5K4 | Nol6     | 0.229 | 0.434 | -0.275 | 0.000  | 0.070  | -0.056 | -0.418 | -0.407 |
| P51863 | Atp6v0d1 | 0.117 | 0.273 | 0.335  | 0.000  | -0.216 | 0.754  | 0.302  | 0.348  |
| Q9CQW9 | Ifitm3   | 0.039 | 0.133 | 1.730  | 0.000  | -0.642 | 2.840  | 2.290  | 2.540  |
| P62281 | Rps11    | 0.867 | 1.000 | 0.187  | -0.095 | 0.000  | 0.460  | -0.436 | -0.080 |
| A2A432 | Cul4b    | 0.030 | 0.112 | -0.179 | 0.020  | 0.000  | -0.399 | -1.010 | -0.636 |
| O35984 | Pbx2     | 0.209 | 0.405 | -0.193 | 0.047  | 0.000  | -0.257 | -0.992 | -0.140 |
| P16460 | Ass1     | 0.143 | 0.310 | -0.587 | 0.000  | 0.018  | 0.512  | 0.153  | 0.075  |
| Q9DCG9 | Trmt112  | 0.673 | 0.950 | 0.000  | -4.950 | 0.195  | -0.811 | -3.810 | -2.730 |
| P27870 | Vav1     | 0.049 | 0.154 | 0.325  | 0.000  | -0.114 | -0.272 | -1.240 | -1.350 |
| P01901 | H2-K1    | 0.918 | 1.000 | 0.000  | 1.100  | -0.068 | -0.245 | 0.777  | 0.664  |
| Q8VDG3 | Parn     | 0.009 | 0.055 | 0.000  | 0.031  | -0.430 | -0.991 | -1.720 | -1.620 |
| Q6P8I4 | Pcnp     | 0.120 | 0.277 | 0.000  | 1.530  | -0.170 | -0.543 | -0.732 | -0.579 |
| P63154 | Crnk1l   | 0.013 | 0.069 | -0.110 | 0.068  | 0.000  | -0.499 | -0.964 | -0.564 |
| Q9CR58 | Slc25a30 | 0.011 | 0.062 | 0.000  | 0.243  | -0.162 | 0.866  | 0.561  | 0.664  |
| P62717 | Rpl18a   | 0.672 | 0.949 | 0.000  | -0.370 | 0.023  | 0.764  | -0.398 | -0.192 |
| Q791T5 | Mtch1    | 0.001 | 0.019 | 0.000  | 0.409  | -0.005 | 1.910  | 1.480  | 1.660  |
| P10630 | Eif4a2   | 0.000 | 0.013 | -0.146 | 0.000  | 0.209  | -1.250 | -1.450 | -1.260 |
| Q9D7G0 | Prps1    | 0.019 | 0.087 | 0.000  | -0.080 | 0.012  | -0.415 | -1.060 | -1.060 |
| Q9DB70 | Fundc1   | 0.256 | 0.470 | -0.517 | 1.650  | 0.000  | 2.470  | 0.712  | 1.270  |
| Q9QWT9 | Kifc1    | 0.255 | 0.469 | 0.245  | 0.000  | -0.236 | 0.102  | -1.330 | -0.505 |
| P18654 | Rps6ka3  | 0.028 | 0.108 | 0.000  | -0.035 | 0.109  | -0.413 | -1.370 | -1.310 |
| Q9JJI8 | Rpl38    | 0.723 | 1.000 | 0.346  | -0.062 | 0.000  | 0.418  | 0.040  | 0.031  |
| Q99KF1 | Tmed9    | 0.007 | 0.047 | 0.000  | 0.304  | -0.089 | 0.916  | 0.738  | 1.130  |
| P00375 | Dhfr     | 0.067 | 0.187 | 0.141  | -0.471 | 0.000  | -0.723 | -1.620 | -0.675 |
| P37913 | Lig1     | 0.180 | 0.367 | 0.049  | 0.000  | -0.161 | 0.072  | -0.870 | -1.240 |
| P29533 | Vcam1    | 0.146 | 0.315 | 0.746  | 0.000  | -0.120 | 0.114  | -1.040 | -0.893 |
| P59325 | Eif5     | 0.094 | 0.236 | 0.365  | 0.000  | -0.125 | -0.059 | -1.180 | -0.979 |
| Q9DC16 | Ergic1   | 0.000 | 0.008 | 0.000  | 0.202  | 0.000  | 1.680  | 1.520  | 1.720  |
| P43276 | Hist1h1b | 0.047 | 0.151 | -0.012 | 0.000  | 0.126  | -0.123 | -0.379 | -0.159 |

|        |          |       |       |        |        |        |        |        |        |
|--------|----------|-------|-------|--------|--------|--------|--------|--------|--------|
| O88673 | Dgka     | 0.006 | 0.046 | 0.000  | 0.135  | -0.029 | -0.968 | -1.940 | -1.570 |
| Q61712 | Dnajc1   | 0.294 | 0.522 | 0.000  | -0.008 | 0.013  | 0.295  | -0.127 | 0.666  |
| Q9CXZ1 | Ndufs4   | 0.012 | 0.067 | -0.105 | 0.323  | 0.000  | 0.881  | 0.660  | 1.120  |
| O70400 | Pdlim1   | 0.000 | 0.014 | -0.049 | 0.191  | 0.000  | -0.883 | -0.928 | -0.774 |
| P27046 | Man2a1   | 0.004 | 0.038 | 0.100  | 0.000  | -0.187 | 0.809  | 0.590  | 0.982  |
| Q3TVI8 | Pbxip1   | 0.001 | 0.017 | -0.130 | 0.192  | 0.000  | 2.250  | 1.830  | 1.640  |
| Q8BY71 | Hat1     | 0.097 | 0.239 | 0.491  | 0.000  | -0.180 | -0.101 | -1.180 | -0.855 |
| Q9CQD1 | Rab5a    | 0.358 | 0.603 | -0.260 | 0.000  | 0.058  | 0.299  | -0.184 | 0.248  |
| Q06185 | Atp5i    | 0.001 | 0.020 | 0.000  | -0.021 | 0.001  | 0.709  | 0.524  | 0.804  |
| Q80X71 | Tmem106b | 0.015 | 0.076 | -0.073 | 0.000  | 0.115  | 1.150  | 0.542  | 0.683  |
| Q6Q477 | Atp2b4   | 0.616 | 0.890 | -0.793 | 0.069  | 0.000  | -0.045 | -0.917 | -0.375 |
| Q9JK81 | Myg1     | 0.012 | 0.068 | -0.941 | 0.000  | 0.003  | -1.670 | -1.890 | -1.610 |
| Q62388 | Atm      | 0.107 | 0.257 | -0.265 | 0.116  | 0.000  | -0.451 | -1.290 | -0.368 |
| Q6DVA0 | Lemd2    | 0.002 | 0.024 | -0.038 | 0.000  | 0.064  | 0.752  | 0.567  | 0.883  |
| Q8BMS9 | Rassf2   | 0.010 | 0.059 | 0.048  | -0.167 | 0.000  | -0.794 | -1.680 | -1.350 |
| P18653 | Rps6ka1  | 0.130 | 0.293 | 0.310  | -0.305 | 0.000  | -0.035 | -2.120 | -1.510 |
| Q9JMD0 | Znf207   | 0.085 | 0.221 | -0.017 | 0.438  | 0.000  | -0.369 | -0.827 | -0.122 |
| P62137 | Ppp1ca   | 0.822 | 1.000 | 0.237  | -0.916 | 0.000  | -0.030 | -0.612 | -0.318 |
| Q8BQZ5 | Cpsf4    | 0.017 | 0.080 | 0.000  | 0.329  | -0.003 | -0.392 | -0.615 | -0.331 |
| A2BE28 | Las1l    | 0.144 | 0.311 | 0.000  | 0.020  | -0.132 | -0.086 | -0.921 | -0.445 |
| Q8BFV2 | Pcid2    | 0.056 | 0.167 | 0.000  | -0.229 | 0.168  | -0.404 | -1.510 | -0.871 |
| Q9CQN7 | Mrpl41   | 0.001 | 0.019 | -0.057 | 0.242  | 0.000  | 1.080  | 0.872  | 1.000  |
| Q8BHS3 | Rbm22    | 0.033 | 0.120 | -0.099 | 0.000  | 0.141  | -0.234 | -0.540 | -0.298 |
| P08920 | Cd2      | 0.013 | 0.069 | -0.128 | 0.000  | 0.180  | -0.418 | -0.328 | -0.464 |
| O35114 | Scarb2   | 0.362 | 0.607 | 0.450  | -0.680 | 0.000  | 0.717  | 0.016  | 0.235  |
| O35129 | Phb2     | 0.003 | 0.030 | 0.000  | 0.062  | -0.164 | 0.922  | 0.591  | 0.718  |
| P61027 | Rab10    | 0.511 | 0.776 | 0.322  | 0.000  | -0.168 | -0.098 | 0.011  | -0.079 |
| Q9D8T2 | Gsdmdc1  | 0.014 | 0.073 | 0.032  | 0.000  | -0.234 | -0.817 | -1.860 | -1.440 |
| Q9JI44 | Dmap1    | 0.183 | 0.371 | 0.000  | -0.120 | 0.075  | -0.268 | -0.446 | -0.006 |
| Q80TY0 | Fnbp1    | 0.000 | 0.014 | -0.105 | 0.201  | 0.000  | -1.180 | -1.500 | -1.310 |
| O70404 | Vamp8    | 0.765 | 1.000 | 0.004  | -0.083 | 0.000  | 0.196  | -0.274 | -0.138 |
| Q8BYK4 | Rdh12    | 0.365 | 0.612 | 0.037  | 0.000  | -0.061 | 0.037  | -0.072 | -0.880 |
| Q3UMY5 | Eml4     | 0.063 | 0.180 | 0.000  | -0.076 | 0.798  | -1.170 | -0.342 | -0.609 |
| Q62426 | Cstb     | 0.075 | 0.202 | 0.000  | 0.417  | -0.437 | -0.446 | -0.934 | -0.684 |
| P17047 | Lamp2    | 0.008 | 0.053 | 0.337  | 0.000  | -0.296 | 1.220  | 0.851  | 1.180  |
| P97823 | Lypla1   | 0.168 | 0.350 | 0.000  | -0.250 | 0.196  | 0.058  | -1.140 | -0.961 |
| P35585 | Ap1m1    | 0.027 | 0.107 | 0.008  | -0.381 | 0.000  | -0.626 | -1.250 | -0.796 |
| P54726 | Rad23a   | 0.000 | 0.014 | -0.136 | 0.081  | 0.000  | -1.310 | -1.450 | -1.100 |
| P62858 | Rps28    | 0.085 | 0.221 | 0.213  | -0.107 | 0.000  | -0.184 | -0.653 | -0.247 |
| Q61503 | Nt5e     | 0.368 | 0.615 | -0.517 | 0.000  | 0.009  | -0.654 | -0.461 | -0.109 |
| Q8BVF7 | Aph1a    | 0.804 | 1.000 | 0.000  | -0.832 | 2.030  | 2.600  | -2.380 | 2.440  |
| Q9CXW2 | Mrps22   | 0.536 | 0.803 | 0.837  | -1.070 | 0.000  | 1.960  | 1.660  | -1.400 |
| Q91VT4 | Cbr4     | 0.890 | 1.000 | 0.000  | 0.188  | -0.136 | 0.418  | -0.152 | -0.122 |
| Q9JJZ4 | Ube2j1   | 0.339 | 0.578 | -0.229 | 0.072  | 0.000  | 0.103  | -0.107 | 0.459  |
| P61089 | Ube2n    | 0.014 | 0.073 | -0.057 | 0.000  | 0.306  | -0.454 | -0.788 | -0.468 |
| Q9JKF7 | Mrpl39   | 0.494 | 0.759 | 0.000  | -3.790 | 0.010  | 1.100  | -0.144 | -1.440 |
| P20444 | Prkca    | 0.030 | 0.113 | -0.268 | 0.109  | 0.000  | -0.390 | -0.460 | -0.434 |
| P32037 | Slc2a3   | 0.192 | 0.384 | 0.000  | 0.198  | -1.110 | -0.827 | -0.767 | -1.920 |
| P50543 | S100a11  | 0.359 | 0.603 | 0.112  | -0.422 | 0.000  | 0.231  | -1.160 | -0.762 |
| Q9JJZ6 | Klf13    | 0.026 | 0.103 | -0.094 | 0.000  | 0.094  | -0.359 | -0.751 | -1.050 |
| Q8BNW9 | Kbtbd11  | 0.007 | 0.048 | -0.061 | 0.000  | 0.260  | -1.280 | -2.450 | -1.660 |
| Q60787 | Lcp2     | 0.009 | 0.057 | -0.096 | 0.845  | 0.000  | -1.390 | -1.550 | -1.040 |
| Q02242 | Pdcd1    | 0.396 | 0.646 | -0.498 | 0.000  | 0.112  | -0.263 | 0.315  | 0.333  |
| Q9Z0L8 | Ggh      | 0.394 | 0.643 | -0.367 | 0.486  | 0.000  | -0.505 | -0.272 | 0.051  |
| Q8VC03 | Eml3     | 0.027 | 0.105 | 0.000  | -0.105 | 0.575  | -0.465 | -0.766 | -0.650 |
| A2AQ19 | Rtf1     | 0.008 | 0.052 | 0.023  | -0.348 | 0.000  | -0.937 | -1.470 | -1.690 |
| Q8BG30 | Nelfa    | 0.687 | 0.963 | -0.364 | 0.000  | 0.565  | -0.184 | 0.126  | -0.112 |
| Q91VR2 | Atp5c1   | 0.035 | 0.125 | 0.127  | 0.000  | -0.028 | 1.150  | 0.535  | 0.475  |
| Q62425 | Ndufa4   | 0.219 | 0.419 | -0.214 | 0.210  | 0.000  | 0.195  | 0.073  | 0.541  |

|        |         |       |       |        |        |        |        |        |        |
|--------|---------|-------|-------|--------|--------|--------|--------|--------|--------|
| P63242 | Eif5a   | 0.208 | 0.404 | 0.466  | -0.135 | 0.000  | 0.222  | -1.650 | -0.813 |
| Q6ZQ58 | Larp1   | 0.589 | 0.861 | 0.238  | -0.291 | 0.000  | 0.329  | -0.257 | 0.307  |
| P46978 | Stt3a   | 0.000 | 0.013 | 0.000  | 0.119  | -0.213 | 1.570  | 1.280  | 1.410  |
| Q9D5T0 | Atad1   | 0.387 | 0.636 | 0.005  | -0.010 | 0.000  | 0.504  | -0.072 | 0.068  |
| Q9JKX6 | Nudt5   | 0.000 | 0.014 | 0.033  | -0.029 | 0.000  | -1.110 | -1.520 | -1.260 |
| Q91YR7 | Prpf6   | 0.053 | 0.162 | 0.000  | 0.162  | -0.181 | -0.213 | -0.817 | -0.784 |
| Q6P1F6 | Ppp2r2a | 0.006 | 0.044 | -0.191 | 0.010  | 0.000  | -0.731 | -1.310 | -1.050 |
| Q8K212 | Pacs1   | 0.237 | 0.444 | -0.105 | 0.819  | 0.000  | 0.622  | 0.460  | 1.960  |
| P35980 | Rpl18   | 0.134 | 0.298 | 0.241  | -0.111 | 0.000  | 0.694  | 0.106  | 0.452  |
| Q9R099 | Tbl2    | 0.033 | 0.120 | 0.000  | 0.449  | -0.050 | 0.634  | 0.647  | 0.976  |
| Q64261 | Cdk6    | 0.020 | 0.089 | 0.186  | -0.124 | 0.000  | -0.539 | -1.450 | -1.390 |
| P63037 | Dnaja1  | 0.340 | 0.580 | 0.072  | 0.000  | -0.107 | 0.131  | -0.492 | -0.294 |
| Q3V009 | Tmed1   | 0.002 | 0.022 | 0.000  | 0.224  | -0.659 | 3.120  | 2.230  | 2.850  |
| Q8BGD9 | Eif4b   | 0.065 | 0.184 | 0.178  | -0.283 | 0.000  | -0.447 | -1.800 | -1.000 |
| Q8QZS1 | Hibch   | 0.404 | 0.655 | 0.000  | 0.318  | -0.092 | 0.156  | 0.135  | 0.318  |
| Q8BYB9 | Poglut1 | 0.033 | 0.121 | 0.293  | -0.547 | 0.000  | 1.410  | 0.557  | 1.140  |
| Q9EPJ9 | Arfgap1 | 0.189 | 0.379 | 0.000  | 0.443  | -0.044 | -0.772 | 0.231  | -1.060 |
| Q99J56 | Der11   | 0.057 | 0.168 | 0.000  | 0.353  | -0.292 | 0.483  | 0.610  | 0.489  |
| Q8CBG9 | Rnf170  | 0.048 | 0.152 | -0.653 | 0.156  | 0.000  | 0.587  | 0.421  | 0.902  |
| P15379 | Cd44    | 0.076 | 0.205 | 0.008  | -0.076 | 0.000  | 0.622  | 0.100  | 0.309  |
| Q9CXT7 | Tmem192 | 0.444 | 0.701 | 0.035  | 0.000  | -0.127 | -0.080 | -0.516 | 0.051  |
| Q99L04 | Dhrs1   | 0.470 | 0.729 | 0.040  | 0.000  | -0.227 | 0.315  | -0.898 | -0.478 |
| Q4VBD2 | Tapt1   | 0.005 | 0.039 | 0.000  | 0.047  | -0.033 | 0.806  | 0.438  | 0.702  |
| P70158 | Smpdl3a | 0.093 | 0.234 | 0.547  | -0.004 | 0.000  | -0.204 | -1.990 | -0.899 |
| P05201 | Got1    | 0.000 | 0.013 | -0.145 | 0.019  | 0.000  | -1.300 | -1.680 | -1.440 |
| P83917 | Cbx1    | 0.031 | 0.115 | -0.155 | 0.623  | 0.000  | -1.040 | -0.915 | -0.466 |
| Q99KB8 | Hagh    | 0.754 | 1.000 | 0.142  | 0.000  | -0.442 | -0.018 | -0.512 | -0.014 |
| Q8VD65 | Pik3r4  | 0.075 | 0.203 | 0.065  | 0.000  | -0.273 | -0.475 | -2.190 | -1.180 |
| P70388 | Rad50   | 0.176 | 0.360 | 0.000  | -0.036 | 0.010  | 0.053  | -0.597 | -0.457 |
| Q8BHA0 | Ino80c  | 0.191 | 0.383 | -0.478 | 0.295  | 0.000  | -0.586 | -0.487 | -0.263 |
| Q9D1C9 | Rrp7a   | 0.568 | 0.837 | 0.000  | 1.660  | -0.041 | -1.260 | 0.528  | 0.770  |
| Q05D44 | Eif5b   | 0.751 | 1.000 | 0.544  | 0.000  | -0.060 | 1.210  | -0.708 | 0.591  |
| Q91ZR1 | Rab4b   | 0.047 | 0.151 | 0.000  | -0.097 | 0.211  | -0.147 | -0.349 | -0.366 |
| Q91VX9 | Tmem168 | 0.078 | 0.208 | 0.000  | 0.153  | -0.166 | 0.492  | 0.337  | 0.135  |
| Q9CWS4 | Cpsf3l  | 0.800 | 1.000 | -1.180 | 0.444  | 0.000  | -0.383 | -0.246 | 0.328  |
| Q0VGB7 | Ppp4r2  | 0.007 | 0.048 | 0.097  | -0.490 | 0.000  | -1.190 | -1.610 | -1.190 |
| Q8VCG3 | Wdr74   | 0.068 | 0.188 | 0.053  | 0.000  | -0.255 | -0.230 | -0.618 | -0.810 |
| P48377 | Rfx1    | 0.168 | 0.350 | 0.000  | 1.250  | -1.230 | -2.680 | -3.290 | -0.112 |
| P03888 | Mtnd1   | 0.570 | 0.839 | -0.830 | 0.541  | 0.000  | -0.768 | 0.658  | 1.100  |
| Q91XA2 | Golm1   | 0.144 | 0.311 | 0.162  | -0.030 | 0.000  | -0.479 | -0.405 | 0.053  |
| Q9JLJ2 | Aldh9a1 | 0.081 | 0.213 | 0.030  | -0.088 | 0.000  | -0.239 | -1.410 | -0.779 |
| Q9CR57 | Rpl14   | 0.016 | 0.078 | 0.142  | 0.000  | -0.271 | 0.753  | 0.423  | 0.557  |
| Q689Z5 | Sbno1   | 0.023 | 0.096 | 0.000  | 0.229  | -0.069 | -0.550 | -1.670 | -1.430 |
| P31266 | Rbpj    | 0.029 | 0.110 | 0.068  | -0.003 | 0.000  | -0.262 | -0.886 | -0.617 |
| P62342 | Selt    | 0.115 | 0.270 | 0.000  | 0.100  | -0.390 | 0.284  | 0.120  | 0.255  |
| P41245 | Mmp9    | 0.231 | 0.435 | 2.280  | 0.000  | -0.046 | 0.785  | -1.710 | -1.570 |
| Q03147 | Cdk7    | 0.029 | 0.110 | 0.000  | -0.008 | 0.017  | -0.257 | -0.564 | -0.237 |
| Q8K2Y9 | Ccm2    | 0.105 | 0.252 | 0.000  | -0.079 | 0.056  | -0.182 | -0.525 | -0.131 |
| P61205 | Arf3    | 0.041 | 0.138 | 0.110  | 0.000  | -0.115 | -0.215 | -0.803 | -0.684 |
| P84078 | Arf1    | 0.041 | 0.138 | 0.110  | 0.000  | -0.115 | -0.215 | -0.803 | -0.684 |
| Q8CG48 | Smc2    | 0.516 | 0.779 | 0.399  | -0.110 | 0.000  | 0.404  | -0.520 | -0.271 |
| Q6PFR5 | Tra2a   | 0.863 | 1.000 | -0.783 | 1.460  | 0.000  | 0.388  | 0.513  | 0.140  |
| Q8C0M9 | Asrgl1  | 0.000 | 0.011 | 0.000  | -0.030 | 0.298  | -1.320 | -1.440 | -1.400 |
| Q8C111 | Gnl3    | 0.503 | 0.767 | -0.054 | 0.404  | 0.000  | 0.261  | -0.582 | 0.031  |
| P59708 | Sf3b6   | 0.380 | 0.630 | 0.000  | 0.753  | -0.018 | -1.090 | 0.063  | 0.292  |
| Q9ERU3 | Znf22   | 0.139 | 0.304 | 0.026  | -0.097 | 0.000  | -0.267 | -2.210 | -0.809 |
| Q91VM9 | Ppa2    | 0.070 | 0.193 | -0.028 | 0.474  | 0.000  | 0.613  | 0.457  | 0.874  |
| P10126 | Eef1a1  | 0.463 | 0.721 | 0.222  | -0.135 | 0.000  | 0.343  | -0.593 | -0.404 |
| P13597 | Icam1   | 0.007 | 0.050 | 0.000  | 0.319  | -0.108 | 0.945  | 0.690  | 0.810  |



|        |          |       |       |        |        |        |        |        |        |
|--------|----------|-------|-------|--------|--------|--------|--------|--------|--------|
| Q8C0C7 | Farsa    | 0.044 | 0.144 | 0.000  | 0.024  | -0.200 | -0.294 | -0.996 | -0.832 |
| P28658 | Atxn10   | 0.868 | 1.000 | 0.308  | 0.000  | -0.205 | 0.902  | -0.791 | -0.288 |
| P28474 | Adh5     | 0.003 | 0.032 | -0.238 | 0.142  | 0.000  | -1.150 | -1.810 | -1.400 |
| O70551 | Srpk1    | 0.012 | 0.067 | 0.029  | 0.000  | -0.348 | -0.612 | -0.911 | -0.979 |
| Q9D6T0 | Nosp     | 0.272 | 0.491 | 0.000  | -0.462 | 0.101  | -0.324 | -0.810 | -0.199 |
| Q9ES97 | Rtn3     | 0.173 | 0.357 | 0.075  | 0.000  | -0.021 | 0.550  | 0.036  | 0.226  |
| P10639 | Txn      | 0.016 | 0.079 | 0.196  | -0.365 | 0.000  | -0.914 | -2.060 | -1.810 |
| Q9D8P4 | Mrpl17   | 0.062 | 0.179 | -0.135 | 0.609  | 0.000  | 0.806  | 0.896  | 0.632  |
| Q922D4 | Ppp6r3   | 0.039 | 0.133 | 0.000  | 0.104  | -0.045 | -0.337 | -1.250 | -0.779 |
| Q61144 | Psen2    | 0.255 | 0.468 | -0.215 | 0.716  | 0.000  | 0.567  | 0.830  | 0.354  |
| P57716 | Ncstn    | 0.012 | 0.067 | 0.058  | 0.000  | -0.094 | 1.230  | 0.526  | 1.070  |
| Q61187 | Tsg101   | 0.722 | 1.000 | 0.000  | 0.043  | -0.115 | 0.395  | -0.280 | 0.042  |
| Q9Z204 | Hnrnpc   | 0.274 | 0.494 | -0.174 | 0.244  | 0.000  | -0.399 | -0.244 | 0.040  |
| Q923D2 | Blvr     | 0.072 | 0.196 | 0.052  | 0.000  | -0.959 | -0.794 | -2.040 | -1.690 |
| Q91WG4 | Elp2     | 0.084 | 0.220 | 0.228  | -0.048 | 0.000  | -0.173 | -1.420 | -0.763 |
| P47791 | Gsr      | 0.018 | 0.084 | 0.341  | 0.000  | -0.118 | -0.466 | -1.080 | -1.080 |
| Q75N62 | Gimap8   | 0.012 | 0.069 | -0.070 | 0.000  | 0.009  | -0.447 | -0.926 | -0.575 |
| Q9JLT4 | Txnrd2   | 0.839 | 1.000 | 0.000  | 0.351  | -0.041 | 0.125  | 0.030  | 0.247  |
| Q9DCD2 | Xab2     | 0.010 | 0.058 | -0.080 | 0.000  | 0.077  | -0.302 | -0.602 | -0.563 |
| Q9CQ69 | Uqcrq    | 0.004 | 0.038 | 0.000  | 0.165  | -0.022 | 0.638  | 0.470  | 0.464  |
| Q9CZU6 | Cs       | 0.005 | 0.041 | 0.000  | 0.137  | -0.034 | 0.868  | 0.509  | 0.669  |
| Q9D662 | Sec23b   | 0.820 | 1.000 | 0.129  | -2.060 | 0.000  | -0.568 | -1.170 | -0.727 |
| O88967 | Yme1l1   | 0.017 | 0.081 | 0.000  | -0.237 | 0.021  | 0.822  | 0.328  | 0.838  |
| Q8K1R7 | Nek9     | 0.096 | 0.238 | -0.055 | 0.220  | 0.000  | -0.017 | -0.634 | -0.594 |
| P68181 | Prkacb   | 0.979 | 1.000 | -1.250 | 0.245  | 0.000  | -0.353 | -0.234 | -0.378 |
| Q9DBG5 | Plin3    | 0.127 | 0.288 | -0.512 | 0.000  | 0.399  | -0.702 | -1.290 | -0.333 |
| P48193 | Epb41    | 0.179 | 0.364 | 0.171  | 0.000  | -0.123 | 0.082  | -0.784 | -0.608 |
| Q5DU31 | Ipcef1   | 0.108 | 0.259 | -0.777 | 0.000  | 0.265  | -1.270 | -2.170 | -0.550 |
| Q60648 | Gm2a     | 0.038 | 0.129 | 0.000  | -0.182 | 0.048  | -0.348 | -1.050 | -0.713 |
| P83940 | Tceb1    | 0.011 | 0.064 | -0.336 | 0.000  | 0.298  | -1.000 | -1.880 | -1.370 |
| Q9JHK5 | Plek     | 0.404 | 0.655 | 0.273  | 0.000  | -0.425 | 0.193  | -0.584 | -0.757 |
| P35282 | Rab21    | 1.000 | 1.000 | -0.077 | 0.256  | 0.000  | 0.281  | -0.147 | 0.045  |
| Q6ZPY7 | Kdm3b    | 0.027 | 0.107 | 0.000  | 0.495  | -0.124 | -0.530 | -1.600 | -1.240 |
| Q8BU14 | Sec62    | 0.007 | 0.049 | 0.047  | -0.056 | 0.000  | 0.844  | 0.419  | 0.756  |
| P46414 | Cdkn1b   | 0.005 | 0.039 | -0.490 | 0.000  | 0.483  | -2.560 | -3.040 | -1.880 |
| Q99J72 | Apobec3  | 0.052 | 0.160 | 0.065  | -0.374 | 0.000  | -0.391 | -1.200 | -1.040 |
| Q811U4 | Mfn1     | 0.420 | 0.674 | 0.000  | 1.260  | -0.739 | 2.090  | 1.140  | -0.275 |
| P35329 | Cd22     | 0.083 | 0.218 | -0.729 | 0.548  | 0.000  | -3.200 | -2.990 | -0.495 |
| Q99J47 | Dhrs7b   | 0.010 | 0.059 | 0.000  | 0.380  | -0.485 | 1.100  | 1.150  | 1.120  |
| Q91YI0 | Asl      | 0.025 | 0.102 | -0.108 | 0.298  | 0.000  | -1.820 | -0.654 | -2.060 |
| P68433 | Hist1h3a | 0.422 | 0.676 | 0.323  | -0.184 | 0.000  | 0.348  | -0.110 | 0.569  |
| P84228 | Hist1h3b | 0.422 | 0.676 | 0.323  | -0.184 | 0.000  | 0.348  | -0.110 | 0.569  |
| P84244 | H3f3a    | 0.422 | 0.676 | 0.323  | -0.184 | 0.000  | 0.348  | -0.110 | 0.569  |
| Q62433 | Ndrp1    | 0.116 | 0.271 | 0.000  | 0.021  | -0.415 | 0.448  | 0.000  | 0.329  |
| Q9D1R9 | Rpl34    | 0.210 | 0.407 | 0.167  | -0.106 | 0.000  | 0.638  | 0.073  | 0.196  |
| Q9JHI7 | Exosc9   | 0.019 | 0.087 | -0.189 | 0.046  | 0.000  | -0.782 | -0.947 | -0.406 |
| Q9CQM5 | Txnrc17  | 0.008 | 0.055 | -0.143 | 0.362  | 0.000  | -1.500 | -1.760 | -2.830 |
| Q9D6J5 | Ndufb8   | 0.039 | 0.132 | -0.884 | 0.149  | 0.000  | 0.958  | 0.797  | 0.597  |
| Q9QZ06 | Tollip   | 0.998 | 1.000 | 0.443  | 0.000  | -0.223 | 0.233  | -0.413 | 0.398  |
| Q8BJ64 | Chdh     | 0.375 | 0.623 | 0.970  | -0.135 | 0.000  | 0.659  | -1.190 | -0.567 |
| Q9Z1R2 | Bag6     | 0.633 | 0.909 | 0.089  | 0.000  | -0.303 | 0.178  | -0.646 | -0.160 |
| Q6NZF1 | Zc3h11a  | 0.003 | 0.032 | -0.026 | 0.242  | 0.000  | -0.859 | -0.855 | -0.564 |
| Q8R0F3 | Sumf1    | 0.002 | 0.024 | 0.000  | 0.232  | -0.568 | 1.860  | 1.650  | 1.660  |
| P48722 | Hspa4l   | 0.006 | 0.047 | -0.299 | 0.139  | 0.000  | -1.170 | -0.804 | -1.320 |
| Q810A7 | Ddx42    | 0.810 | 1.000 | 0.110  | -5.730 | 0.000  | -0.901 | -2.390 | -0.792 |
| Q9CQN6 | Tmem14c  | 0.066 | 0.186 | 0.146  | 0.000  | -0.210 | 0.760  | 0.282  | 0.302  |
| Q9CQL5 | Mrpl18   | 0.012 | 0.067 | -0.027 | 0.185  | 0.000  | 0.925  | 0.512  | 1.060  |
| Q8VEE4 | Rpa1     | 0.072 | 0.197 | 0.054  | -0.271 | 0.000  | -0.678 | -1.690 | -0.560 |
| Q03267 | Ikzf1    | 0.113 | 0.266 | -0.067 | 0.000  | 0.167  | -0.242 | -1.470 | -0.496 |

|        |          |       |       |        |        |        |        |        |        |
|--------|----------|-------|-------|--------|--------|--------|--------|--------|--------|
| Q8CI08 | Slain2   | 0.911 | 1.000 | -1.240 | 0.000  | 1.400  | -0.021 | -0.848 | 1.380  |
| Q9CQR2 | Rps21    | 0.095 | 0.237 | 0.311  | 0.000  | -0.025 | -0.024 | -0.691 | -0.461 |
| Q8R2Q4 | Gfm2     | 0.142 | 0.309 | 0.000  | 0.144  | -0.128 | 0.042  | -1.100 | -0.903 |
| P43274 | Hist1h1e | 0.210 | 0.406 | 0.191  | 0.000  | -0.177 | -0.111 | -0.417 | -0.115 |
| Q76KJ5 | Cd3eap   | 0.295 | 0.522 | -0.247 | 0.366  | 0.000  | -0.128 | -0.249 | -0.160 |
| Q9D710 | Tmx2     | 0.003 | 0.030 | 0.122  | 0.000  | -0.249 | 0.828  | 0.670  | 0.867  |
| O35316 | Slc6a6   | 0.021 | 0.092 | 1.240  | 0.000  | -0.326 | 3.830  | 2.060  | 2.770  |
| Q9QYI3 | Dnajc7   | 0.064 | 0.183 | 0.049  | 0.000  | -0.092 | -0.189 | -0.999 | -0.668 |
| Q9JKB3 | Ybx3     | 0.504 | 0.768 | 0.000  | 0.000  | -0.501 | 0.146  | -0.242 | 0.042  |
| Q9CPT5 | Nop16    | 0.751 | 1.000 | 0.000  | 0.393  | -0.018 | 0.600  | -0.657 | 0.037  |
| P70403 | Cux1     | 0.336 | 0.573 | -2.080 | 0.000  | 1.250  | 0.628  | 0.354  | 1.600  |
| Q9D8V0 | Hm13     | 0.029 | 0.110 | -0.063 | 0.378  | 0.000  | 0.955  | 0.512  | 0.731  |
| Q9CPX6 | Atg3     | 0.178 | 0.364 | 0.037  | 0.000  | -0.063 | -0.014 | -0.809 | -0.341 |
| P97313 | Prkdc    | 0.549 | 0.818 | 0.000  | -0.329 | 0.216  | -0.441 | -0.410 | 0.217  |
| Q9DBG7 | Srpra    | 0.996 | 1.000 | 0.111  | 0.000  | -0.032 | 0.308  | -0.444 | 0.219  |
| P31230 | Aimp1    | 0.280 | 0.502 | 0.052  | 0.000  | -0.151 | 0.072  | -0.920 | -0.350 |
| Q99J95 | Cdk9     | 0.029 | 0.110 | 0.000  | -0.077 | 0.030  | -0.617 | -1.760 | -1.040 |
| Q8JZU2 | Slc25a1  | 0.000 | 0.012 | 0.000  | 0.212  | -0.083 | 1.600  | 1.430  | 1.730  |
| Q3TJD7 | Pdim7    | 0.000 | 0.014 | -0.291 | 0.000  | 0.069  | 2.390  | 2.110  | 2.820  |
| Q6PD03 | Ppp2r5a  | 0.406 | 0.658 | 0.305  | -0.812 | 0.000  | -0.080 | -1.290 | -0.489 |
| Q8CG72 | Adprh12  | 0.003 | 0.033 | -0.365 | 0.161  | 0.000  | -1.260 | -1.820 | -1.390 |
| Q8BXV2 | Bri3bp   | 0.054 | 0.163 | 0.300  | -0.665 | 0.000  | 1.270  | 0.551  | 0.721  |
| Q62311 | Taf6     | 0.460 | 0.719 | -0.606 | 0.000  | 0.112  | -0.200 | -0.935 | -0.177 |
| Q99K23 | Ufsp2    | 0.019 | 0.087 | 0.081  | 0.000  | -0.422 | 0.696  | 0.388  | 0.640  |
| P61924 | Copz1    | 0.013 | 0.070 | 0.000  | 0.191  | -0.211 | -0.551 | -0.896 | -0.603 |
| P31041 | Cd28     | 0.187 | 0.376 | -0.410 | 0.000  | 0.214  | -0.507 | -0.630 | -0.161 |
| Q60973 | Rbbp7    | 0.041 | 0.138 | -0.182 | 0.071  | 0.000  | -0.476 | -0.460 | -0.205 |
| Q9EP97 | Senp3    | 0.650 | 0.926 | -0.050 | 0.562  | 0.000  | 0.402  | -0.247 | -0.046 |
| Q8BU88 | Mrpl22   | 0.017 | 0.080 | 0.003  | -0.068 | 0.000  | 0.895  | 0.346  | 0.595  |
| P53702 | Hccs     | 0.001 | 0.022 | -0.130 | 0.313  | 0.000  | 1.420  | 1.460  | 1.860  |
| Q6PGC1 | Dhx29    | 0.175 | 0.359 | -0.668 | 0.188  | 0.000  | -0.453 | -1.060 | -0.550 |
| Q9D787 | Ppil2    | 0.371 | 0.618 | -0.918 | 0.000  | 0.190  | -0.048 | -2.360 | -0.653 |
| Q80TJ7 | Phf8     | 0.268 | 0.487 | -0.121 | 1.600  | 0.000  | 0.400  | -1.350 | -0.462 |
| P04202 | Tgfb1    | 0.054 | 0.163 | 0.000  | 0.044  | -0.363 | -0.731 | -0.344 | -0.794 |
| Q9WUM4 | Coro1c   | 0.649 | 0.925 | 0.000  | 0.820  | -0.303 | 0.531  | 0.356  | 0.152  |
| Q8R502 | Lrrc8c   | 0.354 | 0.597 | -0.207 | 0.177  | 0.000  | -0.160 | -0.207 | -0.043 |
| O70572 | Smpd2    | 0.081 | 0.213 | 0.525  | -4.690 | 0.000  | 2.230  | 2.590  | 2.610  |
| Q61036 | Pak3     | 0.803 | 1.000 | -1.200 | 0.000  | 0.506  | -0.050 | -0.933 | -0.175 |
| P36552 | Cpox     | 0.116 | 0.271 | 0.330  | 0.000  | -0.246 | -0.140 | -0.571 | -0.479 |
| Q9QUM9 | Psma6    | 0.010 | 0.060 | 0.000  | 0.763  | -0.042 | -1.220 | -1.070 | -0.858 |
| Q8R322 | Gle1     | 0.568 | 0.837 | 0.082  | 0.000  | -0.787 | -0.422 | -0.427 | -0.374 |
| P61021 | Rab5b    | 0.370 | 0.617 | 0.000  | -1.020 | 0.280  | 0.548  | -2.430 | -1.880 |
| P99026 | Psmb4    | 0.001 | 0.021 | 0.000  | 0.003  | -0.115 | -1.070 | -1.620 | -1.350 |
| Q91V04 | Tram1    | 0.196 | 0.389 | 0.000  | 2.330  | -0.017 | 1.120  | 2.790  | 2.950  |
| Q9D0G0 | Mrps30   | 0.012 | 0.068 | 0.000  | 0.044  | -0.091 | 1.010  | 0.479  | 0.609  |
| Q9QYA2 | Tomm40   | 0.010 | 0.059 | 0.000  | 0.202  | -0.235 | 1.300  | 0.723  | 0.891  |
| P12023 | App      | 0.032 | 0.117 | 4.640  | -1.820 | 0.000  | 7.180  | 7.130  | 7.230  |
| Q9Z0M5 | Lipa     | 0.093 | 0.234 | 0.471  | 0.000  | -0.153 | -0.105 | -0.870 | -0.654 |
| Q62448 | Eif4g2   | 0.342 | 0.582 | 0.405  | -0.041 | 0.000  | 0.127  | -0.804 | -0.006 |
| Q9Z0W3 | Nup160   | 0.694 | 0.970 | 0.000  | 0.186  | -0.070 | -0.051 | -0.145 | 0.162  |
| P10922 | H1f0     | 0.130 | 0.293 | 0.000  | -0.145 | 0.190  | -0.040 | -1.060 | -0.629 |
| Q8CJG0 | Ago2     | 0.043 | 0.141 | -0.346 | 0.000  | 0.075  | -0.501 | -0.885 | -0.493 |
| O35144 | Terf2    | 0.061 | 0.176 | -0.147 | 0.408  | 0.000  | -0.504 | -0.507 | -0.217 |
| Q62446 | Fkbp3    | 0.063 | 0.181 | -0.025 | 0.000  | 0.005  | -0.303 | -0.475 | -0.092 |
| Q9JLQ0 | Cd2ap    | 0.993 | 1.000 | 0.063  | -1.320 | 0.000  | -0.269 | -1.480 | 0.514  |
| Q3TLH4 | Prrc2c   | 0.072 | 0.197 | -0.333 | 0.208  | 0.000  | -0.639 | -1.180 | -0.375 |
| Q8BYH7 | Tbc1d17  | 0.194 | 0.387 | 0.112  | -0.197 | 0.000  | 0.008  | -0.707 | -0.450 |
| P70290 | Mpp1     | 0.605 | 0.878 | 0.118  | 0.000  | -0.851 | -0.046 | -0.940 | -0.420 |
| P06342 | H2-Ab1   | 0.941 | 1.000 | 0.000  | 1.270  | -0.824 | -0.149 | 0.502  | 0.243  |

|        |          |       |       |        |        |        |        |        |        |
|--------|----------|-------|-------|--------|--------|--------|--------|--------|--------|
| Q8C208 | Ikzf4    | 0.461 | 0.719 | -0.864 | 0.212  | 0.000  | -0.745 | -0.405 | -0.361 |
| Q8VC28 | Akr1c13  | 0.001 | 0.019 | -0.340 | 0.000  | 0.003  | -1.700 | -2.330 | -1.900 |
| Q8BYM8 | Cars2    | 0.412 | 0.665 | 0.076  | 0.000  | -0.350 | 0.743  | -0.258 | 0.119  |
| Q64310 | Surf4    | 0.002 | 0.029 | 0.000  | 0.103  | -0.025 | 1.070  | 0.679  | 0.805  |
| Q91YK2 | Rrp1b    | 0.028 | 0.107 | -0.039 | 0.046  | 0.000  | -0.265 | -0.819 | -0.549 |
| Q9CRA9 | Fgfr1op2 | 0.213 | 0.409 | -0.430 | 0.257  | 0.000  | -0.553 | -0.291 | -0.299 |
| Q6PGH1 | Bud31    | 0.005 | 0.039 | 0.183  | -0.025 | 0.000  | -0.445 | -0.774 | -0.762 |
| Q8BTX9 | Hsd11    | 0.769 | 1.000 | 0.000  | 0.163  | -0.252 | 0.135  | -0.129 | 0.040  |
| Q61334 | Bcap29   | 0.670 | 0.948 | 0.026  | -0.020 | 0.000  | 0.419  | -0.310 | 0.194  |
| Q80US4 | Actr5    | 0.919 | 1.000 | -1.160 | 0.377  | 0.000  | 1.380  | -1.400 | -1.080 |
| P60766 | Cdc42    | 0.652 | 0.928 | 0.377  | -0.109 | 0.000  | 0.126  | -0.409 | 0.199  |
| Q61072 | Adam9    | 0.035 | 0.124 | 0.660  | -3.660 | 0.000  | 3.520  | 2.950  | 3.250  |
| P62331 | Arf6     | 0.347 | 0.587 | -0.116 | 0.120  | 0.000  | 0.221  | -0.074 | 0.255  |
| Q9CXW4 | Rpl11    | 0.252 | 0.466 | 0.375  | -0.080 | 0.000  | 0.127  | -0.615 | -0.243 |
| Q8CBE3 | Wdr37    | 0.204 | 0.400 | 0.000  | 0.548  | -0.350 | -0.276 | -0.350 | -0.371 |
| O88455 | Dhcr7    | 0.003 | 0.029 | -0.220 | 0.000  | 0.700  | 2.230  | 1.960  | 2.310  |
| Q63932 | Map2k2   | 0.693 | 0.969 | 0.000  | -0.792 | 0.019  | 0.453  | -1.150 | -0.779 |
| P14131 | Rps16    | 0.613 | 0.887 | 0.169  | 0.000  | -0.079 | 0.180  | -0.279 | -0.059 |
| P97434 | Mprip    | 0.001 | 0.019 | 0.000  | -0.488 | 0.742  | 3.430  | 3.150  | 3.770  |
| Q8VE99 | Ccdc115  | 0.807 | 1.000 | -0.113 | 0.000  | 0.110  | -0.028 | -0.201 | 0.135  |
| Q60770 | Stxbp3   | 0.565 | 0.834 | 0.090  | 0.000  | -0.054 | 0.526  | -0.195 | 0.106  |
| Q80UM3 | Naa15    | 0.844 | 1.000 | 0.164  | -1.690 | 0.000  | 0.202  | -1.150 | -1.040 |
| Q9DBY8 | Nvl      | 0.158 | 0.334 | 0.081  | -0.257 | 0.000  | -0.001 | -0.936 | -1.120 |
| Q920Q4 | Vps16    | 0.992 | 1.000 | 0.246  | 0.000  | -0.008 | 0.326  | -0.203 | 0.110  |
| Q9CZ28 | Snf8     | 0.469 | 0.728 | 0.006  | -0.006 | 0.000  | -0.028 | -0.403 | 0.079  |
| Q7TMM9 | Tubb2a   | 0.111 | 0.264 | 0.000  | 0.407  | -0.148 | 1.530  | 0.414  | 0.633  |
| P04235 | Cd3d     | 0.281 | 0.504 | -0.353 | 0.097  | 0.000  | -0.435 | -0.393 | -0.084 |
| Q9CX99 | Grap     | 0.077 | 0.207 | -0.922 | 0.152  | 0.000  | -1.990 | -2.090 | -0.687 |
| Q99K70 | Rragc    | 0.587 | 0.858 | 0.115  | 0.000  | -0.184 | 0.184  | -0.455 | -0.160 |
| Q8JZN7 | Rhot2    | 0.010 | 0.061 | 0.084  | 0.000  | -0.204 | 0.554  | 0.327  | 0.480  |
| P47963 | Rpl13    | 0.796 | 1.000 | -0.012 | 0.034  | 0.000  | 0.497  | -0.522 | 0.307  |
| Q571I9 | Aldh16a1 | 0.015 | 0.076 | 0.000  | 0.059  | -0.391 | -0.726 | -1.380 | -1.130 |
| B1AZA5 | Tmem245  | 0.094 | 0.236 | 0.000  | -4.310 | 0.381  | 1.750  | 1.800  | 2.530  |
| Q8R3C6 | Rbm19    | 0.085 | 0.220 | 0.110  | 0.000  | -0.230 | -0.172 | -1.180 | -0.999 |
| Q9Z0J0 | Npc2     | 0.678 | 0.954 | 0.038  | -0.325 | 0.000  | 0.294  | -0.329 | 0.035  |
| Q3UGR5 | Hdhd2    | 0.093 | 0.234 | 0.000  | 0.123  | -0.395 | -0.377 | -0.501 | -0.971 |
| P14115 | Rpl27a   | 0.809 | 1.000 | 0.307  | 0.000  | -0.285 | 0.495  | -0.240 | -0.018 |
| Q9WUU9 | Mcm3ap   | 0.519 | 0.784 | 0.121  | 0.000  | -0.223 | -0.095 | -0.723 | 0.133  |
| Q99KY4 | Gak      | 0.193 | 0.385 | 0.471  | -0.202 | 0.000  | -0.838 | -3.880 | -0.314 |
| A2AL36 | Cntrl    | 0.237 | 0.444 | 0.000  | -0.173 | 0.276  | -0.143 | -0.798 | -0.066 |
| Q80X41 | Vrk1     | 0.007 | 0.048 | 0.000  | -0.019 | 0.080  | -0.523 | -0.890 | -0.509 |
| O54734 | Ddost    | 0.002 | 0.025 | 0.000  | 0.042  | -0.469 | 1.490  | 1.120  | 1.220  |
| Q9JIF0 | Prmt1    | 0.208 | 0.404 | -2.050 | 1.030  | 0.000  | -1.680 | -2.110 | -1.400 |
| Q149F5 | Tmem71   | 0.621 | 0.895 | -0.561 | 0.000  | 0.498  | -0.795 | -0.363 | 0.363  |
| Q9CXJ4 | Abcb8    | 0.014 | 0.074 | 0.000  | 0.642  | -0.065 | 1.350  | 1.020  | 1.280  |
| Q61142 | Spin1    | 0.161 | 0.339 | -0.044 | 0.000  | 0.623  | -0.259 | -0.903 | -0.017 |
| Q91WS0 | Cisd1    | 0.396 | 0.646 | -0.215 | 1.180  | 0.000  | 0.469  | 0.808  | 0.987  |
| O09174 | Amacr    | 0.030 | 0.113 | 0.000  | 0.612  | -0.235 | 1.240  | 0.949  | 0.900  |
| P62852 | Rps25    | 0.696 | 0.972 | 0.125  | -0.126 | 0.000  | 0.233  | -0.473 | -0.035 |
| P60670 | Nploc4   | 0.740 | 1.000 | 1.190  | 0.000  | -0.041 | 0.721  | -0.556 | 0.388  |
| Q9JLN9 | Mtor     | 0.116 | 0.271 | 0.095  | 0.000  | -0.092 | -0.022 | -0.391 | -0.444 |
| Q9D7N3 | Mrps9    | 0.122 | 0.280 | 0.267  | -0.306 | 0.000  | 1.060  | 0.047  | 1.140  |
| P22682 | Cbl      | 0.000 | 0.013 | -0.024 | 0.000  | 0.154  | -1.190 | -1.550 | -1.380 |
| P35922 | Fmr1     | 0.469 | 0.729 | 0.174  | -0.169 | 0.000  | 0.691  | -1.830 | -0.615 |
| Q5SYD0 | Myo1d    | 0.002 | 0.025 | 0.242  | 0.000  | -0.716 | 3.190  | 2.310  | 3.330  |
| Q6P9R1 | Ddx51    | 0.054 | 0.164 | 0.000  | 0.058  | -0.347 | -0.583 | -1.340 | -0.615 |
| Q8BWM0 | Ptges2   | 0.946 | 1.000 | -1.850 | 2.870  | 0.000  | 1.240  | 0.282  | -0.189 |
| Q8R5F7 | Ifih1    | 0.396 | 0.645 | 0.526  | 0.000  | -0.048 | 0.713  | -1.360 | -0.697 |
| P24788 | Cdk11b   | 0.579 | 0.850 | 0.534  | -6.110 | 0.000  | 0.018  | -1.130 | -0.567 |

|        |           |       |       |        |        |        |        |        |        |
|--------|-----------|-------|-------|--------|--------|--------|--------|--------|--------|
| Q64522 | Hist2h2ab | 0.685 | 0.962 | 0.000  | 0.243  | -0.083 | -0.414 | -0.437 | 0.562  |
| Q99PU8 | Dhx30     | 0.416 | 0.670 | 0.000  | 0.380  | -0.875 | 1.330  | -0.133 | -0.053 |
| Q9JL16 | Isg20     | 0.132 | 0.296 | 0.573  | 0.000  | -0.300 | -0.033 | -1.030 | -1.080 |
| Q8R035 | Ict1      | 0.016 | 0.077 | 0.201  | -0.053 | 0.000  | 1.010  | 0.503  | 0.676  |
| Q9CPT4 | Mydgd     | 0.595 | 0.868 | -0.032 | 0.503  | 0.000  | 0.538  | 0.152  | -1.160 |
| Q8BK63 | Csnk1a1   | 0.143 | 0.310 | 0.250  | 0.000  | -0.233 | -0.046 | -0.568 | -0.775 |
| Q99020 | Hnrnpab   | 0.020 | 0.088 | -0.016 | 0.000  | 0.002  | -0.493 | -0.788 | -0.309 |
| Q05144 | Rac2      | 0.029 | 0.112 | 0.254  | -0.036 | 0.000  | -0.369 | -1.240 | -0.844 |
| P97872 | Fmo5      | 0.485 | 0.748 | 0.755  | -0.101 | 0.000  | 0.639  | -0.667 | -0.436 |
| Q99J36 | Thumpd1   | 0.295 | 0.522 | -0.210 | 0.125  | 0.000  | -5.210 | -0.726 | -0.026 |
| Q7TMB8 | Cyfp1     | 0.108 | 0.259 | 0.000  | 0.124  | -1.260 | 0.703  | 0.315  | 0.700  |
| Q3URS9 | Ccdc51    | 0.007 | 0.048 | 0.194  | 0.000  | -0.221 | 0.635  | 0.568  | 0.670  |
| Q3KNM2 | Marchf5   | 0.008 | 0.055 | 0.127  | 0.000  | -0.352 | 1.370  | 0.744  | 1.400  |
| P62737 | Acta2     | 0.095 | 0.238 | 0.856  | 0.000  | -0.683 | 1.790  | 0.877  | 3.750  |
| P68033 | Actc1     | 0.095 | 0.238 | 0.856  | 0.000  | -0.683 | 1.790  | 0.877  | 3.750  |
| Q8C2K1 | Def6      | 0.035 | 0.125 | 0.000  | -0.029 | 0.144  | -0.322 | -0.929 | -0.442 |
| Q9CQW2 | Arl8b     | 0.497 | 0.763 | 0.125  | 0.000  | -0.062 | 0.265  | -1.000 | -0.059 |
| P28798 | Gm        | 0.144 | 0.311 | 0.111  | 0.000  | -1.300 | -0.647 | -1.980 | -2.100 |
| Q5DW34 | Ehmt1     | 0.432 | 0.687 | 0.000  | -0.729 | 0.184  | -0.148 | -1.100 | -0.351 |
| Q8BHZ4 | Znf592    | 0.469 | 0.728 | -0.184 | 0.000  | 0.011  | 0.150  | -1.000 | -0.161 |
| Q9ET30 | Tm9sf3    | 0.062 | 0.178 | 0.000  | 0.413  | -0.902 | 0.864  | 0.711  | 0.992  |
| Q8QZY9 | Sf3b4     | 0.531 | 0.798 | -2.010 | 0.478  | 0.000  | -3.370 | -0.510 | -0.237 |
| Q7TQH0 | Atxn2l    | 0.095 | 0.238 | -0.117 | 0.000  | 0.068  | -0.604 | -0.867 | -0.096 |
| Q91W59 | Rbms1     | 0.033 | 0.121 | 0.806  | -0.066 | 0.000  | 2.090  | 0.979  | 1.920  |
| Q8VBV3 | Exosc2    | 0.039 | 0.133 | -0.349 | 0.471  | 0.000  | -0.627 | -0.957 | -0.651 |
| Q99LI2 | Clcc1     | 0.023 | 0.096 | -0.100 | 0.000  | 0.227  | 0.468  | 0.534  | 0.896  |
| Q9WUA3 | Pfkip     | 0.033 | 0.119 | -0.074 | 0.000  | 0.023  | -0.325 | -1.040 | -0.682 |
| Q9DC70 | Ndufs7    | 0.005 | 0.040 | 0.000  | 0.110  | -0.184 | 0.684  | 0.466  | 0.575  |
| Q3UND0 | Skap2     | 0.206 | 0.403 | 0.518  | 0.000  | -0.624 | -0.258 | -0.599 | -1.130 |
| A6PWY4 | Wdr76     | 0.081 | 0.213 | 0.000  | -0.414 | 0.003  | -0.428 | -1.580 | -0.920 |
| O70494 | Sp3       | 0.078 | 0.208 | -0.010 | 0.000  | 0.263  | -0.254 | -1.040 | -0.332 |
| Q91X84 | Crtc3     | 0.778 | 1.000 | -1.050 | 0.000  | 0.635  | -0.708 | -0.435 | 0.214  |
| P84091 | Ap2m1     | 0.321 | 0.556 | 0.149  | 0.000  | -0.439 | 0.525  | 0.040  | -0.018 |
| P67871 | Csnk2b    | 0.499 | 0.765 | 0.026  | -0.042 | 0.000  | 0.326  | -0.131 | 0.085  |
| P55258 | Rab8a     | 0.478 | 0.740 | 0.000  | 0.081  | -1.520 | 0.007  | -0.248 | 0.041  |
| P48428 | Tbca      | 0.000 | 0.003 | 0.052  | 0.000  | -0.010 | -1.980 | -2.160 | -2.200 |
| Q9CY27 | Tecr      | 0.001 | 0.019 | 0.000  | 0.089  | -0.113 | 1.390  | 0.978  | 1.330  |
| Q9QZD9 | Eif3i     | 0.115 | 0.269 | 0.000  | 0.168  | -0.055 | -0.088 | -1.120 | -0.527 |
| Q62158 | Trim27    | 0.431 | 0.687 | 0.111  | -0.657 | 0.000  | 0.009  | -1.310 | -0.441 |
| P26516 | Psmc7     | 0.010 | 0.059 | 0.000  | 0.058  | -0.009 | -0.723 | -0.864 | -0.382 |
| Q60634 | Flot2     | 0.111 | 0.264 | 0.405  | 0.000  | -0.394 | 1.280  | 0.318  | 0.643  |
| Q8CAS9 | Parp9     | 0.397 | 0.647 | 0.000  | -0.344 | 0.030  | 0.545  | -1.360 | -1.310 |
| Q91WQ3 | Yars      | 0.766 | 1.000 | 0.202  | -0.103 | 0.000  | 0.408  | -0.347 | -0.198 |
| Q8CI32 | Bag5      | 0.037 | 0.129 | 0.971  | 0.000  | -0.099 | -0.561 | -1.150 | -0.939 |
| Q60749 | Khdrbs1   | 0.078 | 0.208 | -0.028 | 0.000  | 0.031  | -0.155 | -0.632 | -0.249 |
| Q99KG3 | Rbm10     | 0.006 | 0.046 | -0.268 | 0.000  | 0.234  | -0.923 | -1.030 | -0.744 |
| Q9EP89 | Lactb     | 0.009 | 0.055 | 0.000  | 0.227  | -0.004 | 0.611  | 0.438  | 0.673  |
| Q9D3D9 | Atp5d     | 0.126 | 0.287 | -0.224 | 0.095  | 0.000  | 0.573  | 0.056  | 0.267  |
| Q80W00 | Ppp1r10   | 0.269 | 0.487 | 0.000  | -0.002 | 0.060  | -0.042 | -1.260 | -0.145 |
| Q9DC48 | Cdc40     | 0.029 | 0.110 | 0.078  | 0.000  | -0.189 | -0.334 | -0.713 | -0.444 |
| Q9D0F6 | Rfc5      | 0.453 | 0.711 | 0.422  | 0.000  | -0.107 | 0.315  | -0.450 | -0.249 |
| E9Q6J5 | Bod1l     | 0.006 | 0.047 | -0.187 | 0.000  | 0.048  | -0.937 | -1.340 | -0.761 |
| Q8BT60 | Cpne3     | 0.133 | 0.297 | 1.050  | -0.584 | 0.000  | -0.468 | -1.280 | -0.789 |
| Q9JL61 | Rfx5      | 0.105 | 0.252 | -0.505 | 0.086  | 0.000  | -1.050 | -0.889 | -0.307 |
| Q8C0L0 | Tmx4      | 0.533 | 0.800 | 0.070  | -0.116 | 0.000  | 0.113  | -0.118 | 0.169  |
| Q9CR67 | Tmem33    | 0.011 | 0.064 | 0.000  | 0.299  | -0.015 | 1.150  | 0.633  | 1.090  |
| O08912 | Galnt1    | 0.941 | 1.000 | 0.124  | -0.001 | 0.000  | 0.241  | -0.251 | 0.096  |
| O88384 | Vti1b     | 0.769 | 1.000 | 0.080  | 0.000  | -0.234 | 0.387  | -0.713 | -0.140 |
| O88986 | Gcat      | 0.640 | 0.917 | -0.398 | 0.000  | 0.308  | 0.250  | -0.442 | -0.349 |

|        |          |       |       |        |        |        |        |        |        |
|--------|----------|-------|-------|--------|--------|--------|--------|--------|--------|
| Q9WV80 | Snx1     | 0.053 | 0.162 | 0.124  | 0.000  | -0.011 | -0.162 | -0.776 | -0.438 |
| P70318 | Tial1    | 0.250 | 0.463 | -0.420 | 0.005  | 0.000  | -0.234 | -0.572 | -0.309 |
| Q9WU00 | Nrf1     | 0.250 | 0.462 | 0.000  | 0.342  | -0.076 | -0.339 | -0.325 | 0.125  |
| Q9JKX4 | Aatf     | 0.350 | 0.592 | 0.000  | 0.709  | -1.030 | -0.247 | -0.828 | -1.010 |
| O54946 | Dnajb6   | 0.385 | 0.634 | -0.028 | 0.357  | 0.000  | -0.199 | -0.392 | 0.254  |
| Q6KCD5 | Nipbl    | 0.198 | 0.392 | -0.044 | 0.000  | 0.205  | 0.043  | -0.828 | -0.282 |
| Q9EST5 | Anp32b   | 0.003 | 0.033 | -0.081 | 0.000  | 0.074  | -0.928 | -1.530 | -1.580 |
| O35685 | Nudc     | 0.046 | 0.149 | 0.279  | -0.199 | 0.000  | -0.351 | -1.340 | -0.968 |
| Q7TSC1 | Prrc2a   | 0.109 | 0.260 | -0.311 | 0.000  | 0.082  | -0.383 | -0.282 | -0.324 |
| P59729 | Rin3     | 0.908 | 1.000 | 0.881  | -4.610 | 0.000  | -0.058 | -4.180 | -0.287 |
| O55234 | Psmb5    | 0.002 | 0.022 | 0.000  | -0.040 | 0.005  | -0.534 | -0.717 | -0.480 |
| Q9Z0P4 | Palm     | 0.078 | 0.209 | 4.740  | 0.000  | -1.440 | 5.760  | 4.970  | 5.890  |
| Q9JHI5 | Ivd      | 0.333 | 0.571 | 0.000  | 0.127  | -0.011 | 0.544  | -0.052 | 0.212  |
| Q922J9 | Far1     | 0.001 | 0.020 | 0.251  | 0.000  | -0.223 | 1.600  | 1.300  | 1.720  |
| Q8BLN5 | Lss      | 0.000 | 0.011 | 0.000  | -0.076 | 0.465  | 3.020  | 2.690  | 3.120  |
| Q64685 | St6gal1  | 0.007 | 0.047 | -0.227 | 0.000  | 0.149  | -0.709 | -0.705 | -0.551 |
| O35864 | Cops5    | 0.075 | 0.202 | -0.163 | 0.000  | 0.098  | -1.120 | -1.010 | -3.290 |
| Q9CPP6 | Ndufa5   | 0.245 | 0.456 | -0.536 | 0.555  | 0.000  | 0.694  | 0.147  | 0.649  |
| P15532 | Nme1     | 0.004 | 0.038 | 0.000  | 0.373  | -0.032 | -0.827 | -1.420 | -1.230 |
| P70271 | Pdim4    | 0.116 | 0.271 | 0.000  | 0.283  | -1.460 | 0.861  | 0.415  | 0.941  |
| Q9D0M1 | Prpsap1  | 0.155 | 0.330 | -0.116 | 0.000  | 0.125  | -0.059 | -2.380 | -1.090 |
| Q8CB77 | Tceb3    | 0.095 | 0.237 | -0.143 | 0.026  | 0.000  | -0.321 | -0.886 | -0.258 |
| Q99LD9 | Eif2b2   | 0.175 | 0.359 | 0.033  | -0.145 | 0.000  | -0.005 | -0.644 | -0.430 |
| P17879 | Hspa1b   | 0.401 | 0.652 | 0.000  | -1.290 | 0.818  | 0.709  | 0.226  | 0.366  |
| Q61696 | Hspa1a   | 0.401 | 0.652 | 0.000  | -1.290 | 0.818  | 0.709  | 0.226  | 0.366  |
| O88544 | Cops4    | 0.001 | 0.019 | -0.084 | 0.083  | 0.000  | -0.508 | -0.674 | -0.571 |
| O55125 | Nipsnap1 | 0.039 | 0.134 | -0.109 | 0.000  | 0.160  | 0.335  | 0.199  | 0.384  |
| Q8BZR9 | Ncbp3    | 0.042 | 0.139 | 0.000  | -0.357 | 0.139  | -0.557 | -1.920 | -1.740 |
| Q8BX10 | Pgam5    | 0.212 | 0.409 | -0.303 | 0.066  | 0.000  | 0.400  | -0.081 | 0.256  |
| Q8CG47 | Smc4     | 0.107 | 0.256 | 0.051  | 0.000  | -0.195 | -0.164 | -1.130 | -0.645 |
| Q9Z1T1 | Ap3b1    | 0.903 | 1.000 | 0.355  | 0.000  | -0.119 | 0.549  | -0.293 | 0.090  |
| P70245 | Ebp      | 0.136 | 0.301 | -0.271 | 0.136  | 0.000  | 0.523  | 0.032  | 0.355  |
| P41105 | Rpl28    | 0.677 | 0.953 | 0.058  | -0.160 | 0.000  | 0.474  | -0.870 | -0.236 |
| Q8C5P7 | Tdrp     | 0.289 | 0.514 | 0.000  | 0.540  | -3.900 | -0.646 | 0.680  | 3.180  |
| Q921G6 | Lrch4    | 0.128 | 0.290 | 0.000  | 0.144  | -0.354 | -0.491 | -0.524 | -1.780 |
| P48410 | Abcd1    | 0.804 | 1.000 | 0.401  | -0.082 | 0.000  | 0.518  | -0.244 | 0.258  |
| P07091 | S100a4   | 0.014 | 0.073 | -0.132 | 0.000  | 0.151  | -0.450 | -0.771 | -0.446 |
| Q9D1I2 | Card19   | 0.027 | 0.106 | -0.929 | 0.000  | 0.091  | 1.010  | 0.663  | 1.220  |
| Q99LI5 | Znf281   | 0.332 | 0.569 | -0.459 | 0.034  | 0.000  | -0.422 | -0.184 | -0.403 |
| Q99M28 | Rnps1    | 0.025 | 0.101 | 0.023  | 0.000  | -0.010 | -0.173 | -0.526 | -0.366 |
| P19253 | Rpl13a   | 0.055 | 0.166 | 0.072  | -0.126 | 0.000  | 0.649  | 0.148  | 0.402  |
| Q9D0R4 | Ddx56    | 0.301 | 0.530 | -0.058 | 0.000  | 0.322  | 0.224  | -0.377 | -0.453 |
| Q9JJU8 | Sh3bgrl  | 0.001 | 0.016 | -0.279 | 0.031  | 0.000  | -1.640 | -2.170 | -2.160 |
| Q9D753 | Exosc8   | 0.007 | 0.050 | -0.219 | 0.000  | 0.109  | -0.795 | -0.804 | -0.526 |
| Q8C8U0 | Ppfbp1   | 0.004 | 0.036 | -1.930 | 0.000  | 0.118  | 4.310  | 3.430  | 3.420  |
| P20491 | Fcer1g   | 0.868 | 1.000 | 0.025  | 0.000  | -0.757 | 0.174  | -0.883 | -0.237 |
| P08226 | ApoE     | 0.508 | 0.772 | 0.861  | -0.299 | 0.000  | 0.960  | 0.161  | 0.360  |
| Q62384 | Zpr1     | 0.001 | 0.019 | 0.000  | -0.018 | 0.224  | -1.120 | -1.420 | -1.640 |
| Q9DAV9 | Tmem38b  | 0.014 | 0.073 | 0.128  | 0.000  | -0.142 | 0.489  | 0.347  | 0.671  |
| Q3UYC0 | Ppm1h    | 0.126 | 0.287 | -0.049 | 0.465  | 0.000  | -0.111 | -0.156 | -0.485 |
| O35405 | Pld3     | 0.088 | 0.227 | 0.695  | -0.043 | 0.000  | -0.040 | -1.100 | -0.976 |
| P46061 | Rangap1  | 0.066 | 0.186 | -0.024 | 0.000  | 0.159  | -0.246 | -0.623 | -0.156 |
| Q6ZQH8 | Nup188   | 0.536 | 0.803 | 0.000  | 0.306  | -0.291 | -0.168 | -0.324 | 0.082  |
| Q9CQS8 | Sec61b   | 0.002 | 0.025 | 0.034  | 0.000  | -0.122 | 1.150  | 0.720  | 0.971  |
| Q61686 | Cbx5     | 0.059 | 0.173 | 0.129  | -0.280 | 0.000  | -0.287 | -1.000 | -0.770 |
| P97480 | Eya3     | 0.133 | 0.296 | 0.000  | -0.166 | 0.589  | -0.090 | -2.020 | -0.889 |
| Q6A009 | Ltn1     | 0.985 | 1.000 | 0.052  | 0.000  | -0.178 | 0.434  | -0.683 | 0.102  |
| P12382 | Pfkl     | 0.013 | 0.070 | -0.225 | 0.544  | 0.000  | -0.976 | -1.550 | -0.976 |
| Q8BGC0 | Htatsf1  | 0.081 | 0.213 | 0.000  | -0.444 | 0.487  | -1.040 | -4.100 | -1.620 |

|        |          |       |       |        |        |        |        |        |        |
|--------|----------|-------|-------|--------|--------|--------|--------|--------|--------|
| O35648 | Cetn3    | 0.061 | 0.176 | 0.000  | -0.110 | 0.216  | -0.144 | -0.637 | -0.458 |
| Q9R1K9 | Cetn2    | 0.007 | 0.048 | 0.000  | -0.087 | 0.218  | -0.638 | -1.140 | -0.782 |
| Q63844 | Mapk3    | 0.097 | 0.239 | 0.625  | -0.043 | 0.000  | -0.104 | -0.713 | -0.406 |
| Q8JZM7 | Cdc73    | 0.003 | 0.033 | 0.000  | 0.219  | -0.127 | -0.762 | -1.210 | -1.040 |
| P50429 | Arsb     | 0.524 | 0.790 | 0.190  | -1.080 | 0.000  | -0.004 | -1.780 | -0.486 |
| Q3B7Z2 | Osbp     | 0.301 | 0.529 | 0.000  | -0.645 | 0.139  | -0.287 | -1.600 | -0.361 |
| Q8BMC4 | Nop9     | 0.058 | 0.171 | -0.300 | 0.866  | 0.000  | -0.880 | -0.720 | -1.950 |
| P42228 | Stat4    | 0.004 | 0.034 | -0.425 | 0.000  | 0.128  | -1.440 | -1.590 | -1.150 |
| Q8VEH3 | Arl8a    | 0.427 | 0.683 | 0.000  | 0.064  | -0.007 | 0.164  | -2.160 | 0.049  |
| Q8C7R4 | Uba6     | 0.049 | 0.154 | -0.131 | 0.000  | 0.079  | -0.551 | -1.370 | -0.519 |
| Q61216 | Mre11a   | 0.103 | 0.249 | 0.000  | 0.005  | -0.020 | -0.225 | -0.399 | -0.043 |
| Q9CQT1 | Mri1     | 0.010 | 0.059 | -0.208 | 0.000  | 0.005  | -1.030 | -2.150 | -1.650 |
| Q99KK2 | Cmas     | 0.118 | 0.274 | 0.000  | 0.039  | -0.028 | -0.189 | -0.483 | -0.065 |
| P58854 | Tubgcp3  | 0.950 | 1.000 | 0.322  | 0.000  | -0.040 | 0.316  | -0.178 | 0.107  |
| Q60854 | Serpinb6 | 0.023 | 0.096 | 0.000  | 0.176  | -0.003 | -0.265 | -0.736 | -0.439 |
| Q8K3K7 | Agpat2   | 0.136 | 0.300 | 0.673  | -0.697 | 0.000  | 0.782  | 0.680  | 0.732  |
| Q9D8S3 | Arfgap3  | 0.403 | 0.655 | 0.116  | -0.337 | 0.000  | 0.416  | -0.238 | 0.275  |
| O88942 | Nfatc1   | 0.007 | 0.049 | 0.000  | 0.025  | -0.018 | -0.426 | -0.651 | -0.342 |
| P30416 | Fkbp4    | 0.034 | 0.122 | 0.210  | -0.131 | 0.000  | -0.417 | -1.450 | -1.070 |
| Q9WTP6 | Ak2      | 0.009 | 0.057 | 0.187  | 0.000  | -0.011 | -0.394 | -0.833 | -0.616 |
| Q51012 | Slc38a10 | 0.015 | 0.076 | 0.000  | 0.102  | -0.889 | 1.920  | 0.930  | 1.770  |
| Q8CIV2 | Tmem259  | 0.933 | 1.000 | 0.000  | -0.305 | 3.950  | 1.260  | 4.740  | -1.730 |
| Q8BG51 | Rhot1    | 0.015 | 0.076 | 0.000  | 0.146  | -0.220 | 0.857  | 0.556  | 0.462  |
| Q9ERI2 | Rab27a   | 0.016 | 0.078 | -0.088 | 0.258  | 0.000  | -0.439 | -0.539 | -0.320 |
| Q8K327 | Champ1   | 0.072 | 0.197 | 0.000  | 0.682  | -0.760 | -1.110 | -0.962 | -1.050 |
| Q8K3Z9 | Pom121   | 0.636 | 0.912 | -0.467 | 0.020  | 0.000  | -0.303 | -0.455 | 1.110  |
| Q60759 | Gcdh     | 0.450 | 0.708 | 0.000  | 0.355  | -0.371 | 0.773  | -0.053 | 0.092  |
| Q91X78 | Erlin1   | 0.006 | 0.047 | 0.506  | 0.000  | -0.214 | 1.620  | 1.150  | 1.490  |
| O08808 | Diaph1   | 0.008 | 0.053 | 0.000  | 0.331  | -0.056 | -0.629 | -1.230 | -1.130 |
| E9Q3L2 | Pi4ka    | 0.023 | 0.096 | 0.000  | -0.187 | 0.098  | -0.443 | -1.100 | -0.794 |
| P47226 | Tes      | 0.054 | 0.164 | -0.065 | 0.000  | 0.382  | -0.256 | -1.230 | -0.735 |
| P20108 | Prdx3    | 0.006 | 0.046 | 0.214  | -0.058 | 0.000  | 0.778  | 0.509  | 0.675  |
| P28076 | Psmb9    | 0.000 | 0.008 | 0.000  | 0.158  | -0.071 | -1.320 | -1.440 | -1.440 |
| Q922Q2 | Riok1    | 0.209 | 0.406 | 0.319  | -0.036 | 0.000  | 0.212  | -1.780 | -0.775 |
| Q3U2A8 | Vars2    | 0.089 | 0.227 | 0.000  | 0.110  | -0.376 | 0.144  | 0.368  | 0.307  |
| Q99NB8 | Ubqln4   | 0.918 | 1.000 | -0.973 | 0.205  | 0.000  | -0.248 | -0.431 | -0.210 |
| P61961 | Ufm1     | 0.109 | 0.260 | 0.161  | -0.247 | 0.000  | -0.168 | -0.732 | -0.429 |
| Q80YD1 | Supv311  | 0.046 | 0.149 | 0.000  | 0.195  | -0.039 | 0.533  | 0.318  | 0.254  |
| Q9WUM3 | Coro1b   | 0.004 | 0.036 | 0.000  | 0.494  | -0.016 | -0.912 | -0.833 | -0.805 |
| P62245 | Rps15a   | 0.129 | 0.291 | 0.000  | 0.085  | -0.316 | -0.152 | -0.630 | -0.945 |
| Q6ZWQ0 | Syne2    | 0.001 | 0.014 | -0.133 | 0.058  | 0.000  | -0.906 | -1.160 | -0.960 |
| Q9D162 | Ccdc167  | 0.095 | 0.237 | 0.528  | -0.276 | 0.000  | 1.370  | 0.371  | 2.040  |
| Q6NSR8 | Npepl1   | 0.008 | 0.053 | -0.164 | 0.000  | 0.177  | -0.998 | -1.940 | -1.350 |
| B1AY13 | Usp24    | 0.332 | 0.570 | 0.320  | -0.715 | 0.000  | 0.167  | -1.930 | -0.876 |
| Q6NZN0 | Rbm26    | 0.151 | 0.323 | 0.000  | -0.189 | 0.425  | -0.493 | -1.240 | -0.077 |
| O35737 | Hnrnp1   | 0.264 | 0.482 | -0.105 | 0.106  | 0.000  | 0.047  | -0.222 | -0.287 |
| Q01768 | Nme2     | 0.028 | 0.109 | 0.000  | 0.131  | -0.266 | -0.484 | -1.090 | -0.705 |
| Q9D8Y8 | Ing5     | 0.137 | 0.302 | -0.463 | 0.040  | 0.000  | -0.637 | -0.577 | -0.289 |
| Q921F4 | Hnrnp11  | 0.081 | 0.213 | -0.224 | 0.000  | 0.360  | -0.213 | -0.501 | -0.736 |
| Q8K337 | Inpp5b   | 0.001 | 0.019 | -0.129 | 0.000  | 0.150  | -1.020 | -1.310 | -1.430 |
| Q62077 | Plcg1    | 0.003 | 0.033 | -0.125 | 0.000  | 0.471  | -1.190 | -1.370 | -1.750 |
| Q9DBC0 | Selo     | 0.169 | 0.350 | 0.118  | -0.027 | 0.000  | 0.290  | -2.830 | -2.140 |
| Q99KK9 | Hars2    | 0.327 | 0.564 | 0.000  | 0.815  | -0.658 | 0.593  | 0.065  | 1.500  |
| Q8BMQ2 | Gtf3c4   | 0.311 | 0.544 | -0.322 | 0.051  | 0.000  | -0.220 | -0.870 | -0.103 |
| Q99KP3 | Cry1     | 0.002 | 0.027 | -0.510 | 0.000  | 0.271  | -1.670 | -2.060 | -2.120 |
| Q8BHG9 | Cggbp1   | 0.310 | 0.542 | -0.314 | 0.000  | 0.385  | -0.552 | -0.518 | 0.112  |
| Q3UDE2 | Tll12    | 0.009 | 0.058 | -0.158 | 0.219  | 0.000  | -0.662 | -1.330 | -1.070 |
| P54822 | Adsl     | 0.060 | 0.175 | -0.145 | 0.046  | 0.000  | -0.266 | -0.814 | -0.390 |
| P41242 | Matk     | 0.064 | 0.183 | -0.128 | 0.000  | 0.032  | -0.458 | -1.140 | -0.374 |

|        |          |       |       |        |        |        |        |        |        |
|--------|----------|-------|-------|--------|--------|--------|--------|--------|--------|
| O54825 | Bysl     | 0.040 | 0.134 | 0.000  | 0.199  | -0.082 | -0.345 | -0.495 | -0.172 |
| Q60591 | Nfatc2   | 0.930 | 1.000 | 0.183  | -1.590 | 0.000  | -0.316 | -0.458 | -0.478 |
| Q91V12 | Acot7    | 0.020 | 0.089 | -0.038 | 0.193  | 0.000  | 0.736  | 0.449  | 0.396  |
| Q8BWD8 | Cdk19    | 0.857 | 1.000 | -1.270 | 0.000  | 0.173  | -0.518 | -0.267 | -0.035 |
| Q8C5L3 | Cnot2    | 0.073 | 0.198 | -0.390 | 0.000  | 0.063  | -0.329 | -1.130 | -0.861 |
| Q6PEB6 | Mob4     | 0.779 | 1.000 | -0.331 | 0.004  | 0.000  | 0.295  | 0.251  | -0.595 |
| Q8BHF7 | Pgs1     | 0.017 | 0.080 | 0.000  | 1.120  | -0.175 | 2.030  | 1.790  | 2.010  |
| Q8K3J1 | Ndufs8   | 0.002 | 0.025 | 0.000  | 0.081  | -0.026 | 0.747  | 0.504  | 0.553  |
| Q64433 | Hspe1    | 0.001 | 0.018 | 0.000  | 0.100  | -0.080 | 1.090  | 0.779  | 0.991  |
| Q8C5N3 | Cwc22    | 0.023 | 0.096 | 0.000  | 0.191  | -0.464 | -0.905 | -2.000 | -1.370 |
| O70161 | Pip5k1c  | 0.114 | 0.268 | -0.827 | 0.696  | 0.000  | 0.554  | 0.961  | 1.390  |
| Q80UJ7 | Rab3gap1 | 0.391 | 0.640 | -0.189 | 0.000  | 0.108  | 0.130  | -0.432 | -0.341 |
| Q80XP8 | Fam76b   | 0.240 | 0.449 | 0.252  | -1.180 | 0.000  | 0.005  | -3.390 | -2.020 |
| Q3V1L4 | Nt5c2    | 0.047 | 0.149 | 0.000  | 0.109  | -0.392 | -0.430 | -1.090 | -0.869 |
| Q9CXG3 | Ppil4    | 0.025 | 0.103 | 0.000  | -0.294 | 0.128  | -0.723 | -1.650 | -0.961 |
| Q6ZWN5 | Rps9     | 0.784 | 1.000 | 0.205  | 0.000  | -0.149 | 0.324  | -0.286 | -0.170 |
| Q3ULJ0 | Gpd1l    | 0.045 | 0.146 | 0.027  | 0.000  | -0.287 | -0.381 | -1.230 | -1.180 |
| O35215 | Ddt      | 0.032 | 0.118 | -0.099 | 1.310  | 0.000  | -3.690 | -1.070 | -2.560 |
| Q9DB27 | Mcts1    | 0.959 | 1.000 | 0.152  | -0.168 | 0.000  | 0.247  | -0.337 | 0.042  |
| Q9WUP4 | Srd5a3   | 0.212 | 0.409 | 0.098  | -1.150 | 0.000  | 0.613  | -0.036 | 0.341  |
| Q9JKC8 | Ap3m1    | 0.127 | 0.288 | 0.404  | 0.000  | -0.143 | 0.882  | 0.358  | 0.385  |
| Q99KQ4 | Nampt    | 0.129 | 0.291 | 0.000  | 0.160  | -0.599 | -1.710 | -1.790 | -0.193 |
| Q9WUA2 | Farsb    | 0.086 | 0.223 | 0.000  | 0.165  | -0.086 | -0.105 | -0.380 | -0.183 |
| Q8K0D5 | Gfm1     | 0.253 | 0.467 | 0.000  | 0.253  | -0.248 | 1.020  | 0.078  | 0.217  |
| P62320 | Snrpd3   | 0.040 | 0.135 | 0.000  | 0.221  | -0.144 | -0.306 | -0.280 | -0.293 |
| P53026 | Rpl10a   | 0.307 | 0.538 | 0.158  | -0.322 | 0.000  | 0.118  | -0.555 | -0.840 |
| P36993 | Ppm1b    | 0.001 | 0.021 | 0.086  | -0.228 | 0.000  | -1.300 | -1.800 | -1.840 |
| Q61035 | Hars     | 0.035 | 0.123 | -0.560 | 0.683  | 0.000  | -1.710 | -0.913 | -1.280 |
| Q8BP67 | Rpl24    | 0.126 | 0.288 | 0.000  | 0.147  | -0.328 | 0.301  | 0.143  | 0.228  |
| Q8BQZ4 | Ralgapb  | 0.057 | 0.170 | -0.188 | 0.101  | 0.000  | -0.179 | -0.555 | -0.491 |
| Q99KN9 | Clint1   | 0.085 | 0.221 | 0.000  | -0.072 | 0.053  | -0.466 | -1.160 | -0.263 |
| Q6ZWV7 | Rpl35    | 0.412 | 0.665 | 0.100  | -0.032 | 0.000  | 0.532  | -0.166 | 0.271  |
| Q9QZL0 | Ripk3    | 0.408 | 0.660 | 0.000  | 0.733  | -0.238 | 0.654  | -1.470 | -0.577 |
| Q62219 | Tgfb1i1  | 0.001 | 0.022 | -0.852 | 0.592  | 0.000  | 5.540  | 3.950  | 5.150  |
| Q99M51 | Nck1     | 0.034 | 0.122 | 0.044  | 0.000  | -0.172 | -1.730 | -2.880 | -0.932 |
| Q8K157 | Galm     | 0.001 | 0.018 | -0.472 | 0.286  | 0.000  | -2.590 | -2.270 | -2.830 |
| Q6R891 | Ppp1r9b  | 0.007 | 0.048 | -0.300 | 0.179  | 0.000  | -1.040 | -1.590 | -1.050 |
| Q8VE97 | Srsf4    | 0.080 | 0.211 | 0.065  | -0.149 | 0.000  | -0.350 | -2.830 | -2.070 |
| P97868 | Rbbp6    | 0.093 | 0.234 | 0.000  | -0.157 | 0.004  | 0.164  | 0.016  | 0.278  |
| Q9R1J0 | Nsdhl    | 0.000 | 0.010 | 0.212  | 0.000  | -0.154 | 1.860  | 1.730  | 1.980  |
| Q9JLQ2 | Git2     | 0.003 | 0.033 | -0.185 | 0.261  | 0.000  | -0.937 | -1.420 | -1.150 |
| Q99K51 | Pls3     | 0.002 | 0.027 | 0.000  | 0.943  | -0.084 | 3.190  | 2.810  | 3.720  |
| P54818 | Galc     | 0.358 | 0.603 | 0.640  | -0.012 | 0.000  | 0.282  | -0.448 | -0.145 |
| P33609 | Pola1    | 0.060 | 0.176 | 0.058  | 0.000  | -0.834 | -1.570 | -1.450 | -0.752 |
| O70591 | Pfdn2    | 0.026 | 0.103 | 0.000  | 0.302  | -0.526 | -0.767 | -1.420 | -1.340 |
| Q60875 | Arhgef2  | 0.124 | 0.284 | 0.011  | -0.367 | 0.000  | -0.122 | -2.670 | -3.400 |
| Q66JX5 | Fgfr1op  | 0.672 | 0.949 | 0.516  | 0.000  | -0.404 | -0.396 | -2.760 | 1.530  |
| P49117 | Nr2c2    | 0.046 | 0.147 | -0.415 | 0.000  | 0.288  | -1.000 | -1.560 | -0.578 |
| Q5EBH1 | Rassf5   | 0.008 | 0.052 | -0.317 | 0.000  | 0.413  | -1.520 | -2.820 | -2.000 |
| Q99N94 | Mrpl9    | 0.093 | 0.234 | 0.142  | 0.000  | -0.854 | 1.030  | 0.602  | 0.221  |
| Q8C3X2 | Ccdc90b  | 0.005 | 0.040 | -0.005 | 0.303  | 0.000  | 1.660  | 1.020  | 1.250  |
| P81117 | Nucb2    | 0.002 | 0.027 | 0.376  | 0.000  | -0.305 | 1.870  | 1.440  | 1.640  |
| O54788 | Dffb     | 0.056 | 0.166 | 0.000  | 1.160  | -0.052 | -1.010 | -0.828 | -0.474 |
| Q9QY76 | Vapb     | 0.449 | 0.707 | 0.020  | 0.000  | -0.313 | 0.435  | 0.068  | -0.237 |
| P58404 | Strn4    | 0.482 | 0.745 | 0.000  | -0.039 | 0.280  | -0.045 | -0.554 | 0.248  |
| Q9CQI7 | Snrpb2   | 0.009 | 0.058 | 0.000  | -0.133 | 0.059  | -0.549 | -0.991 | -0.617 |
| Q9CQN4 | Sostdc1  | 0.262 | 0.478 | -0.797 | 0.000  | 0.018  | -1.030 | -0.651 | -0.382 |
| Q9JKV1 | Adrm1    | 0.232 | 0.436 | 0.000  | -0.776 | 0.108  | 0.423  | -4.760 | -2.820 |
| Q9JHC9 | Elf2     | 0.083 | 0.216 | -0.198 | 0.039  | 0.000  | -0.443 | -1.150 | -0.367 |

|        |          |       |       |        |        |        |        |        |        |
|--------|----------|-------|-------|--------|--------|--------|--------|--------|--------|
| P63087 | Ppp1cc   | 0.072 | 0.197 | -0.142 | 0.000  | 0.013  | -0.169 | -0.780 | -0.518 |
| P70371 | Terf1    | 0.025 | 0.102 | 0.000  | 0.395  | -0.619 | -1.120 | -1.050 | -1.160 |
| P46467 | Vps4b    | 0.061 | 0.177 | 0.037  | -0.210 | 0.000  | -0.384 | -1.500 | -0.859 |
| Q924A2 | Cic      | 0.368 | 0.615 | 0.000  | -0.386 | 0.805  | -0.032 | -0.150 | -0.582 |
| P55012 | Slc12a2  | 0.024 | 0.099 | 0.000  | -2.210 | 1.390  | 3.800  | 3.040  | 3.760  |
| Q8R5A3 | Apbb1ip  | 0.010 | 0.059 | 0.149  | 0.000  | -0.079 | -0.505 | -1.010 | -1.070 |
| Q9JM90 | Stap1    | 0.167 | 0.348 | 0.120  | -0.071 | 0.000  | -0.139 | -0.977 | -0.217 |
| Q99N87 | Mrps5    | 0.000 | 0.012 | 0.039  | 0.000  | -0.040 | 1.140  | 0.934  | 0.888  |
| Q8VDF2 | Uhrf1    | 0.486 | 0.749 | 0.987  | 0.000  | -0.817 | 0.598  | -0.873 | -1.370 |
| Q91W50 | Csde1    | 0.837 | 1.000 | 0.000  | 1.520  | -0.584 | 0.018  | -0.602 | 1.010  |
| Q6IRU5 | Cltb     | 0.010 | 0.059 | 0.000  | -0.318 | 0.052  | -0.644 | -0.946 | -0.715 |
| Q8R3B7 | Brd8     | 0.126 | 0.286 | -0.614 | 0.116  | 0.000  | -0.398 | -2.410 | -1.310 |
| P25799 | Nfkb1    | 0.017 | 0.080 | 0.000  | -0.065 | 0.139  | -0.430 | -1.120 | -0.909 |
| Q9WTX8 | Mad1l1   | 0.041 | 0.136 | 0.000  | -0.010 | 0.350  | -0.176 | -0.603 | -0.413 |
| Q09XV5 | Chd8     | 0.586 | 0.857 | 0.000  | -1.090 | 0.094  | -0.128 | -0.357 | 0.228  |
| Q923G2 | Polr2h   | 0.104 | 0.252 | -0.057 | 0.000  | 0.218  | -0.239 | -2.030 | -0.901 |
| Q61555 | Fbn2     | 0.000 | 0.013 | -0.574 | 0.551  | 0.000  | 3.680  | 3.550  | 3.750  |
| Q921Y2 | Imp3     | 0.195 | 0.387 | 0.000  | 0.390  | -0.130 | -0.035 | -0.345 | -0.201 |
| Q8C5W3 | Tbcel    | 0.029 | 0.112 | 0.000  | 0.915  | -0.754 | -2.390 | -1.250 | -2.060 |
| Q8JZX4 | Rbm17    | 0.033 | 0.121 | 0.000  | 0.276  | -0.213 | -0.865 | -0.990 | -0.361 |
| Q9ER38 | Tor3a    | 0.003 | 0.032 | 0.000  | 0.258  | -0.172 | 0.998  | 0.891  | 1.220  |
| P51881 | Slc25a5  | 0.203 | 0.400 | 0.000  | 1.090  | -0.121 | 0.477  | 1.260  | 1.440  |
| O88627 | Slc28a2  | 0.316 | 0.549 | 0.079  | -0.550 | 0.000  | -0.170 | -1.540 | -0.377 |
| Q8K4L0 | Ddx54    | 0.274 | 0.495 | 0.000  | -0.315 | 0.208  | 0.291  | -1.620 | -0.988 |
| Q8R1S0 | Coq6     | 0.178 | 0.364 | 0.000  | 0.621  | -0.148 | 0.936  | 0.515  | 0.414  |
| E2JF22 | Piezo1   | 0.024 | 0.098 | 0.000  | -2.270 | 2.080  | 4.710  | 3.970  | 4.720  |
| Q5SV85 | Synrg    | 0.000 | 0.008 | 0.080  | -0.246 | 0.000  | 5.810  | 5.470  | 6.420  |
| Q9DBL7 | Coasy    | 0.134 | 0.298 | 7.440  | -0.978 | 0.000  | 7.090  | 7.330  | 7.010  |
| P83870 | Phf5a    | 0.029 | 0.110 | -0.244 | 0.000  | 0.161  | -0.640 | -1.280 | -0.627 |
| Q5HZI9 | Slc25a5l | 0.018 | 0.083 | -0.031 | 0.632  | 0.000  | 1.200  | 0.956  | 1.100  |
| Q91VC9 | Ghitm    | 0.003 | 0.030 | 0.000  | 0.088  | -0.147 | 1.130  | 0.700  | 0.953  |
| Q8BGB5 | Limd2    | 0.130 | 0.293 | 0.000  | -0.039 | 0.115  | -0.066 | -0.503 | -0.158 |
| Q8CAK1 | Iba57    | 0.322 | 0.558 | 0.036  | 0.000  | -0.449 | 0.439  | -0.205 | 0.176  |
| Q4QQM4 | Trp53i11 | 0.420 | 0.674 | 0.000  | 0.090  | -0.068 | -0.104 | -0.396 | 0.108  |
| Q3UFY0 | Rrp36    | 0.228 | 0.431 | -0.058 | 0.250  | 0.000  | -0.563 | -0.442 | 0.160  |
| P59999 | Arpc4    | 0.531 | 0.798 | 0.000  | 0.139  | -0.184 | 0.125  | 0.054  | -0.015 |
| Q9D6K8 | Fundc2   | 0.013 | 0.071 | 0.000  | 0.474  | -0.255 | 1.690  | 1.410  | 0.958  |
| Q8BRT1 | Clasp2   | 0.206 | 0.402 | -0.569 | 0.000  | 0.003  | -0.061 | -1.620 | -1.150 |
| P62827 | Ran      | 0.003 | 0.031 | -0.041 | 0.044  | 0.000  | -0.674 | -1.100 | -0.771 |
| Q9Z108 | Stau1    | 0.006 | 0.046 | 0.086  | 0.000  | -0.256 | 1.060  | 0.598  | 1.010  |
| P28867 | Prkcd    | 0.874 | 1.000 | 0.163  | 0.000  | -1.170 | -0.357 | 0.299  | -1.260 |
| Q9ET54 | Palld    | 0.003 | 0.031 | 0.370  | -0.667 | 0.000  | 2.810  | 2.010  | 2.300  |
| O08807 | Prdx4    | 0.256 | 0.470 | 0.038  | 0.000  | -0.002 | 0.439  | -0.070 | 0.262  |
| Q9QZ23 | Nfu1     | 0.022 | 0.094 | 0.000  | 0.235  | -0.727 | 1.080  | 0.755  | 1.350  |
| Q3UEB3 | Puf60    | 0.005 | 0.039 | 0.000  | -0.093 | 0.127  | -0.739 | -1.290 | -0.937 |
| Q8C4B4 | Unc119b  | 0.448 | 0.706 | -0.956 | 0.211  | 0.000  | 0.115  | -0.456 | -2.910 |
| Q9JKB1 | Uchl3    | 0.006 | 0.045 | 0.000  | 0.255  | -0.128 | -1.230 | -2.330 | -1.720 |
| Q9D906 | Atg7     | 0.013 | 0.070 | 0.028  | -0.171 | 0.000  | -0.567 | -1.170 | -0.790 |
| P51175 | Ppox     | 0.909 | 1.000 | 0.000  | 0.082  | -0.711 | 0.651  | -0.730 | -0.373 |
| P54775 | Psmc4    | 0.018 | 0.083 | -0.123 | 0.000  | 0.106  | -0.391 | -0.884 | -0.580 |
| Q9ES56 | Trappc4  | 0.865 | 1.000 | 0.000  | 0.560  | -0.421 | -0.618 | 0.358  | 0.174  |
| P51163 | Uros     | 0.072 | 0.196 | 0.559  | -0.181 | 0.000  | -0.372 | -1.170 | -2.130 |
| P11440 | Cdk1     | 0.243 | 0.453 | 0.534  | 0.000  | -1.540 | 1.200  | -0.031 | 0.779  |
| Q810B6 | Ankfy1   | 0.392 | 0.641 | -0.006 | 0.356  | 0.000  | 0.165  | 0.066  | -1.070 |
| P52019 | Sqle     | 0.002 | 0.027 | 0.000  | 1.740  | -0.441 | 5.210  | 5.320  | 6.150  |
| Q9JHR7 | Ide      | 0.004 | 0.036 | 0.000  | 0.341  | -0.020 | -0.764 | -0.819 | -0.576 |
| Q91W53 | Golga7   | 0.087 | 0.224 | 0.117  | 0.000  | -0.062 | 0.932  | 0.100  | 0.924  |
| Q8BUK6 | Hook3    | 0.569 | 0.837 | 0.000  | -0.177 | 0.034  | 0.322  | -0.911 | -0.229 |
| O88447 | Klc1     | 0.910 | 1.000 | 0.000  | -0.262 | 0.051  | 0.542  | -0.641 | 0.015  |



|        |          |       |       |        |        |        |        |        |        |
|--------|----------|-------|-------|--------|--------|--------|--------|--------|--------|
| Q9D1P0 | Mrpl13   | 0.522 | 0.787 | 0.000  | 0.348  | -0.702 | 0.959  | -0.679 | 0.596  |
| Q8BU31 | Rap2c    | 0.351 | 0.592 | 0.427  | -4.150 | 0.000  | 0.508  | -0.089 | 0.526  |
| Q99104 | Myo5a    | 0.027 | 0.107 | -0.006 | 0.000  | 0.152  | 0.704  | 1.170  | 1.920  |
| Q9CQ80 | Vps25    | 0.220 | 0.420 | 0.000  | 0.351  | -0.161 | 0.672  | 0.002  | 1.430  |
| Q8K1M6 | Dnm1l    | 0.892 | 1.000 | 0.042  | 0.000  | -0.313 | 0.147  | -0.185 | -0.310 |
| Q9D2R0 | Aacs     | 0.237 | 0.444 | 1.080  | 0.000  | -0.323 | 1.580  | 0.944  | 0.464  |
| O88271 | Cfdp1    | 0.005 | 0.043 | 0.000  | -0.146 | 0.287  | -1.330 | -2.440 | -2.380 |
| P83882 | Rpl36a   | 0.645 | 0.922 | 0.260  | 0.000  | -0.007 | 0.602  | -0.206 | 0.227  |
| P46638 | Rab11b   | 0.020 | 0.089 | 0.000  | 0.117  | -0.097 | -0.270 | -0.495 | -0.285 |
| Q9ERG2 | Strn3    | 0.489 | 0.754 | 1.350  | -1.770 | 0.000  | 1.130  | -0.551 | 1.530  |
| Q6ZQL4 | Wdr43    | 0.934 | 1.000 | 0.170  | 0.000  | -0.109 | 0.209  | -0.182 | -0.003 |
| P23249 | Mov10    | 0.371 | 0.618 | 0.000  | 0.062  | -0.014 | 0.456  | -0.062 | 0.118  |
| P00493 | Hprt1    | 0.004 | 0.038 | 0.000  | 0.060  | -0.208 | -1.260 | -1.950 | -1.240 |
| O88351 | Ikbkb    | 0.730 | 1.000 | 0.314  | -0.360 | 0.000  | 0.876  | -0.396 | -0.052 |
| Q64191 | Aga      | 0.034 | 0.122 | 0.000  | 0.123  | -1.280 | 0.991  | 1.240  | 0.958  |
| Q9D517 | Agpat3   | 0.027 | 0.107 | 0.000  | 0.348  | -0.252 | 0.753  | 0.547  | 0.673  |
| Q8R5H1 | Usp15    | 0.003 | 0.031 | 0.364  | 0.000  | -0.025 | -1.680 | -2.580 | -1.690 |
| Q62193 | Rpa2     | 0.053 | 0.161 | -4.040 | 0.454  | 0.000  | -5.270 | -6.020 | -4.510 |
| Q8K4X7 | Agpat4   | 0.005 | 0.042 | 0.000  | 0.300  | -0.338 | 1.030  | 0.953  | 1.130  |
| P31996 | Cd68     | 0.988 | 1.000 | 0.659  | -0.005 | 0.000  | 0.757  | -0.122 | 0.002  |
| Q6PIP5 | Nudcd1   | 0.042 | 0.139 | 0.000  | -0.718 | 0.138  | -0.872 | -2.330 | -1.830 |
| Q9QYS9 | Qki      | 0.249 | 0.462 | -0.069 | 0.000  | 0.024  | -0.109 | -0.787 | -0.085 |
| Q9Z2M7 | Pmm2     | 0.001 | 0.021 | -0.080 | 0.000  | 0.173  | -1.300 | -1.910 | -1.880 |
| Q9CZL5 | Pcbd2    | 0.058 | 0.171 | 0.028  | 0.000  | -0.711 | 0.373  | 0.407  | 0.453  |
| Q9QXA5 | Lsm4     | 0.002 | 0.028 | 0.000  | -0.110 | 0.040  | -0.957 | -1.370 | -0.916 |
| Q9Z266 | Snapin   | 0.175 | 0.359 | 0.011  | 0.000  | -0.270 | -0.152 | -0.396 | -0.918 |
| P63166 | Sumo1    | 0.032 | 0.119 | -0.103 | 0.000  | 0.363  | -0.366 | -0.411 | -0.342 |
| P62806 | Hist1h4a | 0.776 | 1.000 | 0.000  | 0.764  | -0.074 | -0.043 | -0.259 | 0.643  |
| Q99KD5 | Unc45a   | 0.428 | 0.684 | -0.049 | 0.000  | 0.165  | 0.289  | -0.589 | -0.285 |
| Q9CQR6 | Ppp6c    | 0.166 | 0.347 | 0.000  | 0.129  | -1.020 | -1.250 | -0.873 | -0.759 |
| Q8R4K2 | Irak4    | 0.016 | 0.078 | 0.152  | 0.000  | -0.178 | -0.685 | -1.670 | -1.410 |
| P48771 | Cox7a2   | 0.957 | 1.000 | -0.456 | 0.000  | 0.309  | 0.089  | -0.409 | 0.125  |
| Q8R0J7 | Vps37b   | 0.293 | 0.520 | 0.183  | -0.042 | 0.000  | 0.116  | -0.393 | -0.175 |
| P47964 | Rpl36    | 0.019 | 0.085 | 0.146  | -0.148 | 0.000  | 0.783  | 0.357  | 0.578  |
| P23298 | Prkch    | 0.210 | 0.407 | -0.013 | 0.000  | 0.048  | -0.075 | -0.813 | -0.138 |
| Q8C4Y3 | Nelfb    | 0.269 | 0.488 | -0.182 | 0.000  | 0.311  | 0.143  | -1.250 | -0.417 |
| Q9CQC9 | Sar1b    | 0.173 | 0.356 | 0.127  | -0.333 | 0.000  | -0.158 | -1.010 | -0.454 |
| Q80U78 | Pum1     | 0.834 | 1.000 | 0.000  | -0.142 | 0.437  | 0.833  | -0.404 | -0.438 |
| Q91ZJ5 | Ugp2     | 0.039 | 0.133 | 0.000  | 0.158  | -0.579 | -0.976 | -1.240 | -0.692 |
| Q9ER64 | Osbpl5   | 0.463 | 0.721 | -0.879 | 0.118  | 0.000  | -0.307 | -0.060 | 0.631  |
| P03911 | Mtnd4    | 0.026 | 0.105 | -1.040 | 0.000  | 0.181  | 0.916  | 1.730  | 1.150  |
| Q9EP72 | Emc7     | 0.060 | 0.175 | 0.022  | 0.000  | -0.211 | 1.430  | 0.205  | 1.070  |
| Q9CY66 | Gar1     | 0.549 | 0.818 | 0.000  | 0.455  | -0.523 | -0.108 | -0.504 | -0.073 |
| Q7TMI3 | Uhrf2    | 0.019 | 0.087 | -0.049 | 0.200  | 0.000  | -0.215 | -0.398 | -0.482 |
| Q8R332 | Nup58    | 0.087 | 0.224 | 0.000  | 0.032  | -0.337 | -0.313 | -1.300 | -0.783 |
| Q9JL56 | Gde1     | 0.140 | 0.306 | -1.780 | 0.755  | 0.000  | 0.971  | 0.895  | 1.310  |
| Q60767 | Ly75     | 0.069 | 0.192 | -0.111 | 0.422  | 0.000  | -0.712 | -1.810 | -0.459 |
| Q9D6L8 | Ppil3    | 0.024 | 0.098 | 0.014  | -0.545 | 0.000  | -0.749 | -0.893 | -0.939 |
| E9PZM4 | Chd2     | 0.002 | 0.022 | 0.000  | 0.221  | -0.104 | -0.784 | -0.978 | -1.070 |
| Q925J9 | Med1     | 0.684 | 0.960 | 0.315  | -0.113 | 0.000  | 0.119  | -0.251 | 0.102  |
| Q7TQ95 | Lnp      | 0.459 | 0.719 | 0.255  | -0.105 | 0.000  | 0.500  | -0.269 | 0.679  |
| O70435 | Psm3     | 0.004 | 0.035 | 0.000  | 0.181  | -0.215 | -0.858 | -1.230 | -1.360 |
| Q9QYF9 | Ndr3     | 0.462 | 0.721 | 0.109  | -0.092 | 0.000  | 0.101  | -2.550 | 0.247  |
| P97427 | Crmp1    | 0.006 | 0.046 | -0.518 | 0.000  | 0.065  | -2.230 | -2.140 | -1.360 |
| P27782 | Lef1     | 0.652 | 0.928 | -1.410 | 0.000  | 1.930  | 0.644  | -0.499 | -1.250 |
| Q6P9R4 | Arhgef18 | 0.035 | 0.124 | -0.095 | 0.000  | 0.552  | -0.603 | -1.540 | -0.742 |
| Q8BL74 | Gif3c2   | 0.500 | 0.765 | -0.311 | 0.113  | 0.000  | -0.136 | -0.581 | 0.027  |
| Q61207 | Psap     | 0.175 | 0.359 | 0.324  | -0.624 | 0.000  | -0.131 | -1.780 | -1.130 |
| P70404 | Idh3g    | 0.775 | 1.000 | 0.000  | 0.070  | -0.248 | 0.756  | -0.504 | -0.078 |

|        |          |       |       |        |        |        |        |        |        |
|--------|----------|-------|-------|--------|--------|--------|--------|--------|--------|
| Q8VE92 | Rbm4b    | 0.900 | 1.000 | 0.000  | 0.638  | -0.243 | 0.413  | -0.485 | 0.642  |
| Q9CPU0 | Glo1     | 0.000 | 0.014 | -0.265 | 0.169  | 0.000  | -1.470 | -1.690 | -1.770 |
| Q9CYI4 | Luc7l    | 0.092 | 0.233 | 0.092  | 0.000  | -0.204 | -0.138 | -1.260 | -1.150 |
| Q9R1Q9 | Atp6ap1  | 0.509 | 0.773 | 0.000  | -3.800 | 1.510  | 2.510  | -2.850 | 3.560  |
| Q9D3G5 | Stx11    | 0.059 | 0.174 | -0.116 | 0.240  | 0.000  | -0.192 | -0.385 | -0.238 |
| Q6P4S8 | Ints1    | 0.654 | 0.930 | -0.251 | 0.000  | 0.398  | -0.260 | 0.115  | 0.830  |
| Q9WTJ4 | Fiz1     | 0.019 | 0.085 | -0.768 | 0.551  | 0.000  | -2.790 | -4.340 | -2.030 |
| Q8BYU6 | Tor1aip2 | 0.011 | 0.064 | -0.119 | 0.338  | 0.000  | 2.410  | 1.340  | 2.900  |
| Q8VDI9 | Alg9     | 0.565 | 0.834 | 0.000  | 0.345  | -1.230 | 0.923  | -0.370 | -0.251 |
| Q8R4X3 | Rbm12    | 0.025 | 0.101 | 0.114  | -0.295 | 0.000  | -0.754 | -1.930 | -1.300 |
| P97822 | Anp32e   | 0.017 | 0.080 | -0.110 | 0.199  | 0.000  | -1.090 | -1.940 | -0.873 |
| Q9D6Y7 | Msra     | 0.068 | 0.189 | 0.549  | -0.217 | 0.000  | -0.252 | -0.768 | -0.814 |
| O55013 | Trappc3  | 0.197 | 0.390 | -0.068 | 0.000  | 0.058  | 0.042  | -0.786 | -0.387 |
| Q5DTM8 | Rnf20    | 0.061 | 0.177 | -0.043 | 0.000  | 0.212  | -0.235 | -0.631 | -0.198 |
| P40630 | Tfam     | 0.889 | 1.000 | 0.483  | 0.000  | -0.272 | 0.049  | 0.003  | 0.264  |
| O35166 | Gosr2    | 0.289 | 0.514 | 0.000  | -0.790 | 0.687  | 0.295  | 0.517  | 0.710  |
| Q8BVL3 | Snx17    | 0.151 | 0.322 | 0.000  | 1.180  | -1.990 | 1.400  | 1.220  | 1.500  |
| Q9WVE8 | Pacsin2  | 0.460 | 0.719 | 0.260  | 0.000  | -0.091 | 0.564  | -0.113 | 0.262  |
| Q9CR00 | Psmc9    | 0.000 | 0.011 | -0.220 | 0.000  | 0.049  | -1.150 | -1.140 | -1.140 |
| O88508 | Dnmt3a   | 0.201 | 0.397 | -0.367 | 0.018  | 0.000  | -0.065 | -1.310 | -0.720 |
| P97386 | Lig3     | 0.578 | 0.849 | 0.068  | 0.000  | -0.173 | 0.026  | -0.596 | 0.058  |
| Q571H0 | Urb1     | 0.375 | 0.623 | 0.847  | 0.000  | -0.023 | 0.911  | -0.805 | -1.810 |
| P57080 | Usp25    | 0.109 | 0.260 | 0.084  | -0.165 | 0.000  | -0.069 | -1.320 | -1.140 |
| P62141 | Ppp1cb   | 0.218 | 0.417 | 0.078  | -0.044 | 0.000  | 0.122  | -0.514 | -0.526 |
| Q9R0P6 | Sec11a   | 0.066 | 0.186 | 0.000  | 0.620  | -0.132 | 0.704  | 0.707  | 0.867  |
| Q8R422 | Cd109    | 0.002 | 0.025 | 0.000  | -1.010 | 1.720  | 6.180  | 6.070  | 6.910  |
| Q9DBA9 | Gtf2h1   | 0.488 | 0.752 | -0.068 | 1.270  | 0.000  | 0.286  | 0.054  | -0.181 |
| P58058 | Nadk     | 0.361 | 0.606 | 1.210  | 0.000  | -0.691 | -0.082 | -0.474 | -0.743 |
| Q4VAE3 | Tmem65   | 0.014 | 0.072 | 0.000  | 0.487  | -0.336 | 1.190  | 1.030  | 1.570  |
| Q91Z38 | Ttc1     | 0.021 | 0.091 | -0.290 | 1.550  | 0.000  | -1.560 | -1.660 | -1.960 |
| P56135 | Atp5j2   | 0.005 | 0.040 | 0.000  | 0.393  | -0.087 | 0.924  | 1.130  | 0.968  |
| Q6P9Q6 | Fkbp15   | 0.205 | 0.402 | 0.000  | 0.346  | -0.021 | 0.306  | -1.450 | -0.962 |
| Q8C0D5 | Efl1     | 0.065 | 0.184 | 0.000  | 0.237  | -0.014 | -0.080 | -0.766 | -0.729 |
| Q8R1N0 | Znf830   | 0.022 | 0.093 | -0.006 | 0.000  | 0.395  | -0.705 | -1.570 | -0.748 |
| Q62348 | Tsn      | 0.000 | 0.003 | -0.097 | 0.000  | 0.053  | -1.470 | -1.540 | -1.490 |
| Q6PE01 | Snrnp40  | 0.016 | 0.078 | 0.000  | 0.172  | -0.032 | -0.475 | -0.884 | -0.420 |
| Q9DCM2 | Gstk1    | 0.701 | 0.977 | 0.010  | 0.000  | -0.212 | 0.377  | -0.571 | -0.378 |
| Q9BCZ4 | Vimp     | 0.732 | 1.000 | -0.386 | 0.179  | 0.000  | 0.206  | -0.445 | -0.249 |
| P02469 | Lamb1    | 0.000 | 0.010 | 0.000  | -0.970 | 0.049  | 4.590  | 4.580  | 4.770  |
| Q9QUM4 | Slamf1   | 0.023 | 0.096 | 0.042  | -0.099 | 0.000  | -0.350 | -0.725 | -0.965 |
| Q9D0C4 | Trmt5    | 0.109 | 0.260 | -0.090 | 0.320  | 0.000  | -0.850 | -4.670 | -1.540 |
| Q8K4D3 | Slc36a1  | 0.353 | 0.594 | 0.603  | 0.000  | -0.040 | 0.838  | 0.183  | 0.432  |
| Q8BGZ4 | Cdc23    | 0.969 | 1.000 | -0.048 | 0.000  | 0.477  | 0.290  | -0.073 | 0.187  |
| Q8BYA0 | Tbcd     | 0.073 | 0.198 | 0.208  | -0.046 | 0.000  | -0.191 | -1.560 | -1.040 |
| Q9CU65 | Zmym2    | 0.023 | 0.097 | 0.139  | 0.000  | -0.153 | -0.563 | -1.080 | -0.512 |
| Q9D6N5 | Drap1    | 0.026 | 0.104 | 0.000  | -0.142 | 0.076  | -0.451 | -1.270 | -0.887 |
| P70268 | Pkn1     | 0.139 | 0.305 | 0.296  | -0.083 | 0.000  | 0.064  | -1.320 | -0.873 |
| Q8K268 | Abcf3    | 0.662 | 0.938 | 0.000  | 0.314  | -0.079 | 0.491  | -0.526 | -0.185 |
| P18181 | Cd48     | 0.140 | 0.306 | -0.550 | 0.111  | 0.000  | -1.040 | -0.896 | -0.252 |
| O35704 | Sptlc1   | 0.322 | 0.557 | 0.000  | 0.610  | -0.610 | 1.960  | -0.450 | 1.180  |
| Q60848 | Hells    | 0.176 | 0.360 | 0.617  | -0.364 | 0.000  | 0.051  | -1.150 | -0.971 |
| Q91VU0 | Fam3c    | 0.497 | 0.763 | -0.324 | 0.000  | 0.112  | 0.324  | -0.226 | 0.155  |
| Q80UP3 | Dgkz     | 0.013 | 0.070 | 0.041  | 0.000  | -0.034 | -0.490 | -1.080 | -0.681 |
| Q9CWK3 | Cd2bp2   | 0.003 | 0.030 | 0.000  | -0.074 | 0.360  | -0.959 | -1.200 | -0.874 |
| O35954 | Pitpnm1  | 0.016 | 0.079 | -0.371 | 0.600  | 0.000  | -0.920 | -1.220 | -1.360 |
| P52432 | Polr1c   | 0.009 | 0.058 | 0.073  | -0.049 | 0.000  | -0.297 | -0.468 | -0.254 |
| E9QAM5 | Helz2    | 0.272 | 0.492 | 0.165  | 0.000  | -0.002 | 0.296  | -0.785 | -0.678 |
| Q9R117 | Tyk2     | 0.498 | 0.763 | -0.303 | 1.680  | 0.000  | 1.680  | -1.290 | 5.770  |
| O09126 | Sema4d   | 0.389 | 0.638 | 0.000  | -0.504 | 0.016  | -0.443 | -0.502 | -0.137 |

|        |          |       |       |        |        |        |        |        |        |
|--------|----------|-------|-------|--------|--------|--------|--------|--------|--------|
| Q8C5L6 | Inpp5k   | 0.406 | 0.658 | 0.323  | -0.057 | 0.000  | 0.022  | -0.757 | 0.149  |
| Q9D1M4 | Eef1e1   | 0.658 | 0.934 | 0.000  | 0.081  | -0.123 | 0.368  | -0.741 | -0.135 |
| P08556 | Nras     | 0.188 | 0.378 | -0.332 | 0.239  | 0.000  | 0.065  | 0.343  | 0.475  |
| Q8R3C0 | Mcmbp    | 0.017 | 0.081 | 0.000  | 0.437  | -0.374 | -0.773 | -1.280 | -1.210 |
| P16332 | Mut      | 0.015 | 0.076 | 0.000  | 0.403  | -0.314 | 1.300  | 0.791  | 1.140  |
| P98195 | Atp9b    | 0.441 | 0.697 | 0.290  | 0.000  | -1.440 | 0.627  | -0.514 | 0.370  |
| Q9WU84 | Ccs      | 0.004 | 0.036 | -0.087 | 0.000  | 0.263  | -0.735 | -1.230 | -1.050 |
| Q8BG15 | Ctdspl2  | 0.161 | 0.339 | 0.158  | 0.000  | 0.000  | -0.044 | -1.070 | -0.326 |
| Q7TNP2 | Ppp2r1b  | 0.648 | 0.925 | 0.000  | -1.640 | 0.062  | -0.091 | -1.450 | -1.050 |
| Q9QZH3 | Ppie     | 0.006 | 0.045 | -0.384 | 0.000  | 0.099  | -1.000 | -1.100 | -0.840 |
| Q9D0B6 | Pbdc1    | 0.040 | 0.134 | -0.101 | 0.317  | 0.000  | -0.847 | -1.480 | -0.430 |
| Q8VDD8 | Wash1    | 0.001 | 0.014 | 0.000  | -0.181 | 0.148  | -2.180 | -2.970 | -2.460 |
| Q9CWF2 | Tubb2b   | 0.013 | 0.070 | -1.480 | 0.205  | 0.000  | 2.340  | 1.630  | 2.050  |
| Q924L1 | Letmd1   | 0.672 | 0.950 | -1.210 | 0.847  | 0.000  | -1.630 | 0.966  | -1.040 |
| P58871 | Tnks1bp1 | 0.036 | 0.125 | 0.000  | 0.067  | -0.956 | 0.608  | 0.849  | 0.825  |
| Q9JLR1 | Sec61a2  | 0.001 | 0.015 | 0.743  | -0.345 | 0.000  | 3.980  | 3.380  | 3.910  |
| Q8JZR0 | Acs15    | 0.110 | 0.261 | -0.081 | 0.000  | 0.085  | 0.658  | 0.086  | 0.323  |
| Q80UU2 | Rpp38    | 0.005 | 0.039 | 0.284  | 0.000  | -0.181 | -0.693 | -0.891 | -0.837 |
| Q9D8S4 | Rexo2    | 0.107 | 0.257 | -0.191 | 0.000  | 0.052  | 0.356  | 0.007  | 0.431  |
| Q7TSQ8 | Pdpr     | 0.166 | 0.347 | 0.000  | 0.234  | -0.035 | 1.070  | 0.066  | 0.599  |
| Q99LD4 | Gps1     | 0.116 | 0.271 | 0.000  | -0.608 | 0.075  | -0.392 | -2.690 | -1.650 |
| Q9D7B6 | Acad8    | 0.170 | 0.353 | 0.000  | -1.970 | 0.001  | 1.380  | 0.114  | 0.357  |
| Q9D2E2 | Toe1     | 0.038 | 0.129 | -0.230 | 0.099  | 0.000  | -0.498 | -1.300 | -0.711 |
| Q8BGK6 | Slc7a6   | 0.020 | 0.088 | 0.473  | 0.000  | -0.733 | 1.870  | 1.030  | 1.780  |
| Q3U319 | Rnf40    | 0.939 | 1.000 | -0.282 | 0.018  | 0.000  | -0.232 | -0.673 | 0.745  |
| Q8BWW9 | Pkn2     | 0.014 | 0.073 | 0.067  | -0.265 | 0.000  | 1.650  | 0.718  | 1.050  |
| Q69ZX6 | Morc2a   | 0.031 | 0.116 | 0.000  | 0.070  | -0.068 | -0.314 | -1.090 | -0.935 |
| Q8BMG7 | Rab3gap2 | 0.815 | 1.000 | 0.974  | 0.000  | -2.280 | -0.344 | -1.730 | -0.051 |
| P52332 | Jak1     | 0.177 | 0.363 | 0.099  | -0.263 | 0.000  | 0.484  | 0.026  | 0.174  |
| Q8K370 | Acad10   | 0.053 | 0.162 | 0.324  | 0.000  | -0.339 | 0.796  | 0.651  | 0.382  |
| Q9ERG0 | Lima1    | 0.016 | 0.078 | -1.030 | 0.000  | 1.290  | 3.320  | 2.760  | 2.660  |
| P70677 | Casp3    | 0.003 | 0.030 | -0.016 | 0.138  | 0.000  | -1.190 | -2.040 | -1.570 |
| P70303 | Ctps2    | 0.915 | 1.000 | -1.140 | 0.507  | 0.000  | -0.358 | -0.806 | 0.335  |
| Q8C079 | Strip1   | 0.020 | 0.089 | 0.000  | 0.023  | -0.001 | -0.227 | -0.556 | -0.309 |
| O35963 | Rab33b   | 0.738 | 1.000 | 0.000  | 0.257  | -0.073 | 0.208  | -0.033 | 0.142  |
| Q91V01 | Lpcat3   | 0.000 | 0.014 | 0.081  | 0.000  | -0.276 | 1.120  | 1.080  | 1.090  |
| Q3U308 | Ctu2     | 0.630 | 0.906 | -0.090 | 0.000  | 0.201  | 0.290  | -0.324 | -0.173 |
| Q9R0N0 | Galk1    | 0.017 | 0.082 | 0.220  | 0.000  | -0.038 | -0.664 | -1.340 | -0.646 |
| Q6TEK5 | Vkorc111 | 0.114 | 0.268 | 0.438  | 0.000  | -0.745 | 0.971  | 0.277  | 1.730  |
| P51612 | Xpc      | 0.055 | 0.166 | -0.178 | 0.000  | 0.301  | -0.793 | -1.460 | -0.385 |
| Q8VI93 | Oas3     | 0.907 | 1.000 | -1.180 | 1.910  | 0.000  | -0.757 | 1.090  | 0.796  |
| Q9R0L7 | Akap8l   | 0.946 | 1.000 | -0.713 | 0.000  | 5.100  | 1.220  | -0.563 | 3.270  |
| A2ALW5 | Dnajc25  | 0.089 | 0.227 | 0.000  | 0.099  | -0.136 | 0.114  | 1.400  | 1.090  |
| Q8BX80 | Engase   | 0.040 | 0.135 | 0.000  | 0.000  | -0.421 | -0.479 | -1.130 | -0.991 |
| O35345 | Kpna6    | 0.521 | 0.787 | 0.000  | 0.117  | -0.022 | 0.282  | -0.333 | -0.277 |
| Q6P9R2 | Oxsr1    | 0.403 | 0.653 | 0.000  | -0.051 | 0.401  | 0.108  | -0.789 | 0.103  |
| Q8BX70 | Vps13c   | 0.314 | 0.547 | -0.587 | 4.430  | 0.000  | -1.540 | -0.507 | 0.164  |
| Q9D2X5 | Mau2     | 0.343 | 0.582 | 1.700  | -0.299 | 0.000  | 0.721  | -2.370 | -0.480 |
| Q9CQZ6 | Ndufb3   | 0.002 | 0.025 | -0.037 | 0.054  | 0.000  | 0.800  | 0.535  | 0.580  |
| Q8VEH8 | Erlec1   | 0.003 | 0.030 | -0.264 | 0.815  | 0.000  | 2.390  | 2.290  | 2.460  |
| Q9DBS9 | Osbpl3   | 0.028 | 0.108 | -0.747 | 0.622  | 0.000  | -1.900 | -2.520 | -1.220 |
| Q9ET22 | Dpp7     | 0.022 | 0.093 | 0.280  | -0.651 | 0.000  | 1.120  | 0.745  | 1.040  |
| Q7TT00 | Supt20h  | 0.529 | 0.796 | -0.259 | 0.000  | 0.989  | -0.214 | -1.420 | 0.814  |
| P55264 | Adk      | 0.048 | 0.152 | 0.000  | -0.071 | 0.107  | -0.916 | -2.270 | -0.795 |
| Q99J45 | Nrbp1    | 0.236 | 0.444 | 0.000  | 0.419  | -0.402 | 0.398  | -1.600 | -2.240 |
| Q99MD9 | Nasp     | 0.010 | 0.058 | 0.000  | 0.025  | -0.302 | -0.880 | -1.720 | -1.430 |
| Q61183 | Papola   | 0.003 | 0.031 | -0.236 | 0.000  | 0.015  | -2.470 | -1.820 | -3.070 |
| Q9JK38 | Gnpnat1  | 0.020 | 0.087 | -0.428 | 0.206  | 0.000  | -1.870 | -4.330 | -2.580 |
| Q9EQN3 | Tsc22d4  | 0.102 | 0.247 | -0.175 | 0.000  | 0.444  | -0.414 | -1.580 | -0.445 |

|        |            |       |       |        |        |        |        |        |        |
|--------|------------|-------|-------|--------|--------|--------|--------|--------|--------|
| Q64523 | Hist2h2ac  | 0.516 | 0.779 | 0.000  | -4.270 | 2.780  | 1.090  | -7.740 | -1.910 |
| Q6GSS7 | Hist2h2aa1 | 0.516 | 0.779 | 0.000  | -4.270 | 2.780  | 1.090  | -7.740 | -1.910 |
| Q8C5L7 | Rbm34      | 0.393 | 0.641 | 0.000  | -0.513 | 0.047  | -0.005 | -1.680 | -0.339 |
| Q61164 | Ctcf       | 0.396 | 0.646 | 0.000  | -0.032 | 0.363  | 0.254  | -1.530 | -0.016 |
| Q9EQW7 | Kif13a     | 0.113 | 0.266 | 0.000  | -0.297 | 0.102  | -0.141 | -3.210 | -2.580 |
| P45878 | Fkbp2      | 0.153 | 0.325 | 0.467  | -0.204 | 0.000  | 0.711  | 0.217  | 0.684  |
| P05063 | Aldoc      | 0.181 | 0.368 | 0.123  | -0.392 | 0.000  | -0.459 | -0.168 | -0.728 |
| Q08122 | Tle3       | 0.005 | 0.040 | -0.384 | 0.000  | 0.107  | -1.320 | -2.140 | -1.610 |
| Q8VEJ4 | Nle1       | 0.656 | 0.932 | 0.581  | 0.000  | -0.057 | 0.782  | -1.120 | 0.012  |
| Q9D6M3 | Slc25a22   | 0.001 | 0.016 | 0.000  | 0.088  | -0.280 | 1.510  | 1.170  | 1.410  |
| Q6PGB6 | Naa50      | 0.083 | 0.216 | 0.000  | 1.470  | -0.508 | -1.190 | -2.400 | -0.760 |
| Q9ERE7 | Mesdc2     | 0.075 | 0.203 | 0.218  | -0.024 | 0.000  | 0.875  | 0.330  | 0.366  |
| P97808 | Fxyd5      | 0.556 | 0.825 | 0.040  | -0.208 | 0.000  | 0.153  | -0.912 | -0.054 |
| Q9D2R6 | Coa3       | 0.017 | 0.080 | 0.000  | 0.304  | -0.248 | 1.120  | 0.611  | 0.904  |
| Q6PDK2 | Kmt2d      | 0.835 | 1.000 | -0.075 | 0.000  | 0.729  | 0.995  | -3.110 | 1.750  |
| O35955 | Psmb10     | 0.003 | 0.033 | -0.486 | 0.139  | 0.000  | -1.520 | -1.850 | -1.380 |
| Q9D666 | Sun1       | 0.011 | 0.064 | -0.159 | 0.054  | 0.000  | 0.644  | 0.375  | 0.368  |
| Q69ZQ2 | Isy1       | 0.308 | 0.540 | 0.000  | 0.024  | -0.086 | -0.353 | -4.570 | -0.172 |
| Q9CQM9 | Glrx3      | 0.670 | 0.948 | 0.000  | 0.737  | -0.831 | 0.182  | -0.361 | -0.620 |
| Q3UHD9 | Agap2      | 0.512 | 0.776 | 0.000  | -1.590 | 2.090  | 1.140  | 0.229  | 1.570  |
| P62869 | Tceb2      | 0.005 | 0.040 | -0.160 | 0.000  | 0.361  | -0.924 | -1.230 | -0.867 |
| Q8VE18 | Smg8       | 0.067 | 0.186 | 0.000  | -0.252 | 0.155  | -0.327 | -0.869 | -0.432 |
| P59997 | Kdm2a      | 0.046 | 0.148 | -0.142 | 0.000  | 0.321  | -0.327 | -0.528 | -0.298 |
| Q5U4D9 | Thoc6      | 0.253 | 0.467 | -0.007 | 0.107  | 0.000  | 0.133  | -0.430 | -0.299 |
| Q61790 | Lag3       | 0.676 | 0.952 | -1.220 | 1.200  | 0.000  | -1.810 | -0.508 | 0.885  |
| Q8BMA6 | Srp68      | 0.366 | 0.613 | 0.286  | -0.009 | 0.000  | 0.374  | -0.726 | -0.412 |
| P47934 | Crat       | 0.395 | 0.644 | 0.000  | -3.600 | 0.145  | 2.180  | -1.640 | 0.743  |
| Q9R0M6 | Rab9a      | 0.599 | 0.872 | 0.489  | -0.023 | 0.000  | 1.030  | -0.266 | 0.401  |
| Q91WK1 | Spryd4     | 0.045 | 0.146 | 0.000  | 0.231  | -0.354 | 0.951  | 0.398  | 0.566  |
| Q9CQE1 | Nipsnap3b  | 0.179 | 0.365 | 0.000  | 0.874  | -0.677 | 0.769  | 0.963  | 0.692  |
| Q9WVD5 | Slc25a15   | 0.005 | 0.042 | -0.508 | 0.364  | 0.000  | 1.270  | 1.750  | 1.660  |
| Q8BFU2 | Hist3h2a   | 0.777 | 1.000 | 0.000  | -4.410 | 1.560  | 0.303  | -3.670 | -1.420 |
| Q8CGP5 | Hist1h2af  | 0.777 | 1.000 | 0.000  | -4.410 | 1.560  | 0.303  | -3.670 | -1.420 |
| Q8CGP7 | Hist1h2ak  | 0.777 | 1.000 | 0.000  | -4.410 | 1.560  | 0.303  | -3.670 | -1.420 |
| Q6DID3 | Scaf8      | 0.074 | 0.200 | -0.313 | 0.005  | 0.000  | -0.483 | -1.190 | -0.490 |
| Q4FZC9 | Syne3      | 0.324 | 0.559 | 0.000  | -0.003 | 0.647  | 0.218  | -0.099 | -0.456 |
| Q7TQK4 | Exosc3     | 0.740 | 1.000 | 0.915  | 0.000  | -1.500 | 0.287  | -2.560 | 0.408  |
| Q3U3R4 | Lmf1       | 0.048 | 0.151 | 0.000  | -1.190 | 0.317  | 1.070  | 0.891  | 1.090  |
| Q8VCS3 | Fam20b     | 0.046 | 0.148 | -0.069 | 0.014  | 0.000  | 0.362  | 0.123  | 0.555  |
| P63328 | Ppp3ca     | 0.969 | 1.000 | 0.252  | -1.670 | 0.000  | -0.681 | -0.504 | -0.307 |
| Q99LG2 | Tnpo2      | 0.144 | 0.311 | -0.517 | 0.405  | 0.000  | -0.599 | -0.596 | -0.407 |
| P34902 | Il2rg      | 0.090 | 0.230 | -0.469 | 0.000  | 0.113  | -0.901 | -0.440 | -0.531 |
| O70422 | Gtf2h4     | 0.073 | 0.198 | 0.000  | -0.232 | 0.120  | -0.256 | -0.742 | -0.400 |
| Q9R059 | Fhl3       | 0.007 | 0.049 | 0.173  | -0.055 | 0.000  | 1.130  | 0.644  | 0.797  |
| Q99N69 | Lpxn       | 0.148 | 0.318 | -1.040 | 0.000  | 0.363  | -0.818 | -1.570 | -0.895 |
| Q921E6 | Eed        | 0.268 | 0.487 | 0.000  | -0.754 | 0.004  | -0.297 | -1.060 | -0.684 |
| Q8BVW3 | Trim14     | 0.019 | 0.086 | -0.022 | 0.118  | 0.000  | -0.230 | -0.342 | -0.147 |
| Q5SU73 | Coil       | 0.142 | 0.309 | -0.437 | 0.214  | 0.000  | -0.490 | -1.940 | -0.572 |
| P97360 | Etv6       | 0.033 | 0.119 | 0.065  | -0.481 | 0.000  | -0.573 | -0.940 | -1.020 |
| Q8BFR4 | Gns        | 0.030 | 0.113 | 0.302  | -0.538 | 0.000  | 1.030  | 0.604  | 0.845  |
| Q91Z53 | Grhpr      | 0.060 | 0.176 | 0.000  | -0.087 | 0.077  | -0.125 | -0.652 | -0.656 |
| P11688 | Itga5      | 0.002 | 0.028 | 1.160  | -0.159 | 0.000  | 3.840  | 3.150  | 3.570  |
| P97494 | Gclc       | 0.814 | 1.000 | 0.000  | -3.610 | 0.176  | -1.950 | -2.290 | -0.243 |
| Q9DCC4 | Pycl1      | 0.014 | 0.073 | -0.043 | 0.149  | 0.000  | -0.894 | -0.823 | -0.369 |
| Q9WTK3 | Gpaa1      | 0.096 | 0.239 | 0.000  | 0.450  | -0.747 | 0.795  | 0.416  | 1.080  |
| Q61165 | Slc9a1     | 0.476 | 0.736 | 0.000  | 3.350  | -0.438 | 1.690  | 2.590  | 1.560  |
| P35285 | Rab22a     | 0.166 | 0.347 | 0.077  | -0.430 | 0.000  | -0.291 | -0.396 | -0.563 |
| O08759 | Ube3a      | 0.729 | 1.000 | -1.650 | 0.000  | 0.109  | -0.266 | -1.150 | -0.824 |
| P55937 | Golga3     | 0.555 | 0.824 | 0.743  | -0.155 | 0.000  | 0.761  | -0.700 | -0.507 |

|        |          |       |       |        |        |        |        |        |        |
|--------|----------|-------|-------|--------|--------|--------|--------|--------|--------|
| Q8CGF7 | Tcerg1   | 0.003 | 0.030 | 0.000  | -0.052 | 0.036  | -0.456 | -0.710 | -0.493 |
| Q8R0A0 | Gtf2f2   | 0.054 | 0.164 | 0.000  | 0.383  | -0.040 | -0.234 | -1.020 | -0.550 |
| Q69ZR2 | Hectd1   | 0.209 | 0.406 | 0.000  | -0.236 | 0.376  | 0.342  | -1.490 | -2.030 |
| P01887 | B2m      | 0.002 | 0.024 | -0.085 | 0.041  | 0.000  | -0.362 | -0.494 | -0.399 |
| Q3TZX8 | Nol9     | 0.039 | 0.134 | 0.000  | 0.630  | -0.031 | -0.350 | -0.702 | -0.502 |
| P15864 | Hist1h1c | 0.098 | 0.241 | 0.000  | -0.140 | 0.151  | -0.276 | -0.471 | -0.109 |
| P70218 | Map4k1   | 0.001 | 0.015 | -0.001 | 0.000  | 0.020  | -0.901 | -1.290 | -1.110 |
| O55142 | Rpl35a   | 0.064 | 0.183 | 0.103  | 0.000  | -0.035 | 0.678  | 0.149  | 0.445  |
| Q9D7H3 | RtcA     | 0.331 | 0.569 | 0.000  | 0.509  | -0.242 | -0.137 | -0.464 | 0.003  |
| O08585 | Clta     | 0.023 | 0.095 | 0.196  | 0.000  | -0.151 | -0.400 | -0.895 | -0.573 |
| Q00651 | ltga4    | 0.060 | 0.176 | -0.013 | 0.000  | 0.220  | -0.247 | -0.705 | -0.212 |
| Q9JHQ5 | Lztf1    | 0.249 | 0.461 | 0.000  | 1.550  | -1.860 | -0.883 | -2.190 | -1.500 |
| Q8CI33 | Cwf1911  | 0.057 | 0.168 | 0.000  | -0.338 | 0.204  | -0.426 | -1.560 | -1.040 |
| Q9DBD5 | Pelp1    | 0.585 | 0.857 | 0.000  | 0.295  | -0.055 | 0.379  | -0.345 | -0.239 |
| Q8BPB0 | Mob1b    | 0.065 | 0.184 | 0.002  | -0.022 | 0.000  | -1.070 | -0.971 | -0.160 |
| Q921Y0 | Mob1a    | 0.065 | 0.184 | 0.002  | -0.022 | 0.000  | -1.070 | -0.971 | -0.160 |
| Q91VJ4 | Stk38    | 0.126 | 0.288 | 0.000  | 0.140  | -0.080 | -0.206 | -1.220 | -0.366 |
| Q91VA6 | Poldip2  | 0.121 | 0.278 | 0.000  | 0.211  | -1.280 | 1.200  | 0.544  | 0.335  |
| Q8R307 | Vps18    | 0.451 | 0.708 | 0.576  | 0.000  | -2.330 | -5.690 | 0.344  | -1.420 |
| Q9Z1P6 | Ndufa7   | 0.004 | 0.037 | -0.044 | 0.000  | 0.010  | 1.000  | 0.554  | 0.732  |
| O35492 | Clk3     | 0.094 | 0.236 | 0.396  | 0.000  | -0.283 | -0.169 | -1.650 | -1.240 |
| Q9CQY5 | Magt1    | 0.003 | 0.030 | 0.204  | 0.000  | -0.242 | 1.620  | 1.090  | 1.260  |
| Q80UK8 | Ints2    | 0.770 | 1.000 | 0.000  | 0.667  | -0.462 | 0.070  | -0.378 | 0.167  |
| Q9JJA7 | Ccnl2    | 0.068 | 0.188 | -0.146 | 0.098  | 0.000  | -1.860 | -1.480 | -4.980 |
| Q91VT1 | Nsmce2   | 0.108 | 0.258 | 0.022  | 0.000  | -0.060 | -0.181 | -1.100 | -0.457 |
| Q9QZA0 | Ca5b     | 0.641 | 0.917 | -0.511 | 1.310  | 0.000  | 0.880  | 0.859  | -3.100 |
| P53798 | Fdft1    | 0.001 | 0.020 | 0.237  | -0.533 | 0.000  | 3.080  | 2.240  | 2.750  |
| Q8CGC6 | Rbm28    | 0.512 | 0.776 | 0.000  | 0.234  | -0.130 | 0.198  | -0.353 | -0.157 |
| Q91XC9 | Pex16    | 0.174 | 0.359 | 0.000  | 0.199  | -0.204 | -0.082 | -0.321 | -0.286 |
| Q8BJU0 | Sgta     | 0.034 | 0.122 | 0.181  | -0.136 | 0.000  | -0.501 | -1.020 | -0.422 |
| Q80YQ2 | Med23    | 0.492 | 0.756 | -0.693 | 0.000  | 0.423  | -1.010 | -4.040 | 1.240  |
| P58281 | Opa1     | 0.111 | 0.263 | -0.010 | 0.052  | 0.000  | -0.089 | -0.563 | -0.194 |
| Q9D1K2 | Atp6v1f  | 0.511 | 0.776 | 0.318  | 0.000  | -0.373 | 1.120  | -0.116 | -0.082 |
| Q9QY36 | Naa10    | 0.267 | 0.486 | -0.260 | 0.090  | 0.000  | -0.029 | -1.070 | -0.333 |
| Q03526 | Itk      | 0.005 | 0.041 | 0.620  | -0.355 | 0.000  | -2.150 | -1.480 | -1.840 |
| Q9D0L8 | Rnmt     | 0.050 | 0.155 | -0.425 | 0.000  | 0.004  | -0.704 | -1.880 | -1.010 |
| Q8VDT9 | Mrpl50   | 0.179 | 0.365 | 0.195  | -2.670 | 0.000  | 0.890  | 0.464  | 0.716  |
| Q6ZWY3 | Rps27l   | 0.220 | 0.419 | 0.023  | -0.195 | 0.000  | 0.934  | -0.035 | 0.227  |
| P70700 | Poir1b   | 0.494 | 0.759 | -2.100 | 0.525  | 0.000  | -0.634 | -1.670 | -1.200 |
| A2RSY6 | Trmt1l   | 0.025 | 0.102 | 0.000  | 0.306  | -0.067 | -0.295 | -0.736 | -0.522 |
| Q8K215 | Lym4     | 0.019 | 0.086 | 0.000  | 0.224  | -0.231 | 0.718  | 0.439  | 0.602  |
| Q8VE11 | Mttr6    | 0.246 | 0.457 | 0.271  | -0.215 | 0.000  | 0.096  | -0.464 | -0.672 |
| P35601 | Rfc1     | 0.381 | 0.631 | 0.361  | -0.017 | 0.000  | 0.169  | -0.405 | -0.034 |
| P68134 | Acta1    | 0.003 | 0.033 | 0.940  | -1.600 | 0.000  | 5.180  | 4.230  | 4.750  |
| Q8BTV2 | Cpsf7    | 0.081 | 0.213 | 0.276  | -0.116 | 0.000  | -0.122 | -0.689 | -0.432 |
| Q9R1P0 | Psma4    | 0.005 | 0.039 | 0.000  | -0.149 | 0.029  | -0.825 | -1.490 | -1.300 |
| Q6NXI6 | Rprd2    | 0.317 | 0.551 | -1.120 | 0.219  | 0.000  | -2.430 | -0.277 | -0.826 |
| O88958 | Gnpda1   | 0.039 | 0.133 | -0.415 | 0.245  | 0.000  | -1.350 | -1.430 | -0.531 |
| P97814 | Pstpip1  | 0.021 | 0.091 | 0.000  | -0.470 | 0.035  | -0.725 | -1.330 | -1.030 |
| Q9CR20 | Ier3ip1  | 0.008 | 0.054 | -0.005 | 0.000  | 0.262  | 1.340  | 0.984  | 0.751  |
| P61963 | Dcaf7    | 0.926 | 1.000 | -0.608 | 0.000  | 0.679  | -0.850 | -0.695 | 1.910  |
| Q9JLZ3 | Auh      | 0.243 | 0.453 | 0.028  | 0.000  | -0.092 | 0.540  | -0.170 | 0.570  |
| Q9DBC3 | Cmtr1    | 0.022 | 0.093 | -0.160 | 0.062  | 0.000  | -0.408 | -0.824 | -0.464 |
| Q8BGS7 | Cept1    | 0.152 | 0.323 | -0.085 | 0.000  | 0.517  | 0.219  | 1.040  | 0.812  |
| Q9JLV1 | Bag3     | 0.004 | 0.038 | -0.462 | 0.056  | 0.000  | 1.980  | 1.160  | 1.520  |
| Q61462 | Cyba     | 0.727 | 1.000 | 0.833  | -0.144 | 0.000  | 0.806  | -0.516 | -0.163 |
| Q8BGA9 | Oxa1l    | 0.039 | 0.133 | 0.000  | -1.550 | 0.191  | 1.400  | 1.020  | 1.330  |
| O88286 | Wiz      | 0.633 | 0.909 | 0.000  | -0.611 | 0.289  | -0.058 | -1.210 | 0.168  |
| Q91WK2 | Eif3h    | 0.199 | 0.394 | 0.008  | 0.000  | -0.211 | -0.065 | -0.983 | -0.428 |

|        |           |       |       |        |        |        |        |        |        |
|--------|-----------|-------|-------|--------|--------|--------|--------|--------|--------|
| Q9CZE3 | Rab32     | 0.582 | 0.853 | 0.695  | 0.000  | -0.235 | 0.973  | 0.064  | 0.146  |
| Q3UMW8 | Cln5      | 0.192 | 0.384 | 0.765  | -0.088 | 0.000  | 0.123  | -0.679 | -0.468 |
| Q8BUY5 | Timmec1   | 0.012 | 0.067 | 0.000  | 0.616  | -0.099 | 1.080  | 1.290  | 1.470  |
| B2RRE7 | Otud4     | 0.049 | 0.154 | 0.191  | -0.090 | 0.000  | -0.294 | -1.270 | -0.795 |
| Q62018 | Ctr9      | 0.075 | 0.202 | 0.000  | 0.236  | -0.610 | 0.292  | 0.707  | 0.680  |
| Q9CZV5 | Supt7l    | 0.575 | 0.845 | -0.216 | 0.417  | 0.000  | -1.000 | 0.236  | 0.159  |
| Q9EQ06 | Hsd17b11  | 0.029 | 0.111 | 0.144  | 0.000  | -0.254 | 0.493  | 0.301  | 0.386  |
| Q9ERB0 | Snap29    | 0.440 | 0.697 | 0.870  | -3.570 | 0.000  | 0.006  | 0.284  | 0.520  |
| Q9WV70 | Noc2l     | 0.688 | 0.964 | 1.540  | -3.470 | 0.000  | 0.186  | -0.279 | -4.600 |
| P18572 | Bsg       | 0.144 | 0.311 | 0.286  | 0.000  | -0.498 | 1.030  | 0.217  | 0.378  |
| Q8R5L3 | Vps39     | 0.681 | 0.957 | 0.177  | 0.000  | -0.224 | 0.208  | -0.321 | -0.195 |
| Q99JX3 | Gorasp2   | 0.318 | 0.551 | 0.543  | -0.132 | 0.000  | -0.070 | -1.110 | 0.110  |
| Q7TN29 | Smap2     | 0.490 | 0.754 | 0.000  | 0.100  | -0.152 | -0.023 | -1.170 | 0.172  |
| P33215 | Nedd1     | 0.164 | 0.344 | -0.152 | 0.000  | 0.093  | 0.011  | -0.730 | -0.524 |
| O08528 | Hk2       | 0.670 | 0.948 | 0.751  | 0.000  | -0.383 | 0.849  | -0.130 | 0.255  |
| Q8BZ21 | Kat6a     | 0.030 | 0.114 | -0.637 | 0.000  | 0.235  | -0.967 | -1.210 | -1.830 |
| O35218 | Cpsf2     | 0.010 | 0.060 | -0.237 | 0.000  | 0.049  | -0.570 | -0.956 | -1.070 |
| O09000 | Ncoa3     | 0.012 | 0.067 | -0.143 | 0.000  | 0.327  | -0.566 | -1.070 | -0.840 |
| Q8K394 | Plcl2     | 0.265 | 0.483 | -1.200 | 0.866  | 0.000  | -2.160 | 0.368  | -3.650 |
| Q9QYF1 | Rdh11     | 0.005 | 0.043 | -0.299 | 0.000  | 0.105  | 1.200  | 1.590  | 0.889  |
| Q68FG3 | Spty2d1   | 0.592 | 0.864 | 0.222  | 0.000  | -0.215 | 0.424  | 0.089  | -1.650 |
| O54918 | Bcl2l11   | 0.580 | 0.851 | 0.000  | 0.199  | -0.024 | 0.457  | -0.129 | 0.176  |
| P70279 | Surf6     | 0.040 | 0.135 | -0.194 | 0.000  | 0.050  | -0.442 | -1.100 | -0.554 |
| P10853 | Hist1h2bf | 0.891 | 1.000 | 0.000  | 1.230  | -0.393 | -0.370 | -0.110 | 1.030  |
| P10854 | Hist1h2bm | 0.891 | 1.000 | 0.000  | 1.230  | -0.393 | -0.370 | -0.110 | 1.030  |
| Q64475 | Hist1h2bb | 0.891 | 1.000 | 0.000  | 1.230  | -0.393 | -0.370 | -0.110 | 1.030  |
| Q64478 | Hist1h2bh | 0.891 | 1.000 | 0.000  | 1.230  | -0.393 | -0.370 | -0.110 | 1.030  |
| Q64525 | Hist2h2bb | 0.891 | 1.000 | 0.000  | 1.230  | -0.393 | -0.370 | -0.110 | 1.030  |
| Q6ZWY9 | Hist1h2bc | 0.891 | 1.000 | 0.000  | 1.230  | -0.393 | -0.370 | -0.110 | 1.030  |
| Q8CGP2 | Hist1h2bp | 0.891 | 1.000 | 0.000  | 1.230  | -0.393 | -0.370 | -0.110 | 1.030  |
| Q3U4G3 | Xyylt1    | 0.129 | 0.292 | -3.840 | 0.000  | 0.665  | 2.220  | 0.974  | 1.950  |
| Q9D8Y1 | Tmem126a  | 0.000 | 0.011 | 0.000  | 0.009  | -0.058 | 1.380  | 1.100  | 1.350  |
| Q8VE10 | Naa40     | 0.971 | 1.000 | 0.406  | -0.674 | 0.000  | 0.640  | -0.660 | -0.192 |
| P29352 | Ptpn22    | 0.929 | 1.000 | -0.876 | 0.000  | 0.428  | 0.287  | -0.538 | -0.326 |
| Q9D067 | Mdm1      | 0.213 | 0.409 | -0.765 | 0.076  | 0.000  | -1.780 | -1.030 | -0.213 |
| Q3TL44 | Nlr1      | 0.072 | 0.196 | 0.000  | 0.222  | -0.158 | 0.479  | 0.242  | 0.303  |
| P61202 | Cops2     | 0.045 | 0.146 | 0.034  | -0.233 | 0.000  | -0.510 | -1.110 | -0.490 |
| Q9CZN8 | Qrs1      | 0.705 | 0.982 | 0.000  | 0.121  | -0.527 | 0.510  | -0.341 | -0.174 |
| Q9WUD1 | Stub1     | 0.453 | 0.711 | 0.263  | 0.000  | -0.427 | -2.900 | 0.114  | 0.084  |
| Q9CQC6 | Bzw1      | 0.586 | 0.858 | 0.316  | 0.000  | -0.007 | 0.514  | -0.502 | -0.281 |
| P27577 | Ets1      | 0.124 | 0.284 | 0.000  | -0.224 | 0.369  | -0.182 | -1.230 | -0.507 |
| O35239 | Ptpn9     | 0.099 | 0.243 | 1.850  | 0.000  | -0.292 | 1.650  | 2.830  | 1.930  |
| Q8BTY2 | Slc4a7    | 0.880 | 1.000 | -1.360 | 0.085  | 0.000  | 1.850  | -2.210 | -0.310 |
| P62311 | Lsm3      | 0.001 | 0.015 | -0.195 | 0.357  | 0.000  | -1.830 | -1.570 | -1.770 |
| Q8CI95 | Osbpl11   | 0.208 | 0.404 | 0.301  | -0.146 | 0.000  | 0.187  | -3.070 | -1.250 |
| Q9JMG1 | Edf1      | 0.286 | 0.511 | -0.171 | 0.000  | 0.306  | -0.570 | -0.968 | 0.252  |
| Q91VN4 | Chchd6    | 0.012 | 0.068 | 0.000  | 0.253  | -1.110 | 1.520  | 1.500  | 1.590  |
| Q9ESJ0 | Xpo4      | 0.053 | 0.162 | -0.029 | 0.000  | 0.040  | -0.345 | -1.510 | -0.877 |
| Q8BSU7 | Mob3a     | 0.407 | 0.658 | 0.000  | 0.097  | -2.220 | -0.040 | -0.204 | 0.256  |
| Q6S5J6 | Krit1     | 0.383 | 0.632 | -0.145 | 0.136  | 0.000  | 0.151  | -5.620 | -0.086 |
| Q61211 | Eif2d     | 0.125 | 0.285 | 0.228  | -0.376 | 0.000  | -0.314 | -1.080 | -0.460 |
| Q9WTS2 | Fut8      | 0.130 | 0.293 | 0.405  | 0.000  | -0.479 | 0.706  | 0.666  | 0.242  |
| Q78IS1 | Tmed3     | 0.014 | 0.074 | 0.000  | 0.223  | -1.510 | 1.870  | 1.690  | 2.000  |
| Q8R079 | Bfar      | 0.008 | 0.054 | 0.000  | 0.725  | -0.217 | 1.700  | 1.460  | 1.620  |
| Q8VEB4 | Pla2g15   | 0.315 | 0.549 | 0.547  | 0.000  | -0.266 | 0.162  | -0.645 | -0.399 |
| Q9WU56 | Pus1      | 0.903 | 1.000 | 2.900  | -0.702 | 0.000  | 2.620  | 0.251  | -1.290 |
| Q6PHN9 | Rab35     | 0.343 | 0.583 | 0.000  | 0.085  | -0.300 | 0.045  | -0.496 | -0.430 |
| Q8K4I3 | Arhgef6   | 0.010 | 0.058 | -0.259 | 0.000  | 0.183  | -0.812 | -1.510 | -1.100 |
| Q91ZN5 | Slc35b2   | 0.050 | 0.156 | 0.290  | -0.058 | 0.000  | 0.603  | 0.284  | 0.611  |

|        |           |       |       |        |        |        |        |        |        |
|--------|-----------|-------|-------|--------|--------|--------|--------|--------|--------|
| Q9CQT2 | Rbm7      | 0.006 | 0.045 | 0.000  | 0.373  | -0.119 | -1.020 | -0.864 | -0.687 |
| B2RWS6 | Ep300     | 0.670 | 0.948 | 0.000  | 1.170  | -0.194 | 0.000  | 0.248  | 0.134  |
| O35904 | Pik3cd    | 0.505 | 0.769 | 0.000  | -0.553 | 0.026  | -0.185 | -0.997 | -0.099 |
| P53569 | Cebpz     | 0.047 | 0.150 | -0.954 | 0.335  | 0.000  | -1.100 | -1.420 | -1.770 |
| Q71RI9 | Kyat3     | 0.016 | 0.079 | 0.000  | 0.041  | -0.711 | 0.821  | 0.680  | 0.805  |
| O88587 | Comt      | 0.014 | 0.072 | -0.457 | 0.392  | 0.000  | 1.030  | 0.947  | 1.110  |
| Q3U3I9 | Znf865    | 0.618 | 0.892 | -0.629 | 0.000  | 0.065  | -0.096 | -1.410 | 0.093  |
| O55187 | Cbx4      | 0.330 | 0.567 | -0.691 | 0.501  | 0.000  | -0.719 | -0.528 | -0.198 |
| Q03958 | Pfdn6     | 0.085 | 0.220 | 0.000  | 1.140  | -1.340 | -2.000 | -2.560 | -1.220 |
| P50295 | Nat2      | 0.967 | 1.000 | -0.476 | 1.580  | 0.000  | -0.090 | 1.210  | 0.073  |
| Q91YJ2 | Snx4      | 0.196 | 0.389 | -2.760 | 1.530  | 0.000  | 2.230  | 0.355  | 3.230  |
| P10820 | Prf1      | 0.674 | 0.951 | -2.310 | 0.297  | 0.000  | -1.810 | -1.130 | -0.338 |
| Q8CGZ0 | Cherp     | 0.085 | 0.220 | -0.172 | 0.165  | 0.000  | -0.178 | -0.463 | -0.254 |
| Q3UFM5 | Nom1      | 0.004 | 0.036 | 0.326  | 0.000  | -0.274 | -1.150 | -1.300 | -0.992 |
| Q9D338 | Mrpl19    | 0.721 | 1.000 | 0.000  | -0.168 | 0.031  | 1.100  | -0.582 | -0.080 |
| Q8R3Q0 | Saraf     | 0.011 | 0.063 | 0.000  | -0.070 | 0.063  | 0.953  | 0.424  | 0.822  |
| Q8BIP0 | Dars2     | 0.009 | 0.056 | 0.571  | -0.292 | 0.000  | 1.550  | 1.440  | 2.180  |
| Q9Z1G3 | Atp6v1c1  | 0.811 | 1.000 | 0.655  | -0.150 | 0.000  | 0.660  | -0.397 | -0.062 |
| P63085 | Mapk1     | 0.087 | 0.224 | 0.263  | 0.000  | -0.001 | -0.072 | -0.496 | -0.204 |
| Q6DID7 | Wls       | 0.003 | 0.031 | 0.000  | 0.433  | -0.720 | 2.130  | 2.080  | 2.410  |
| A2A4P0 | Dhx8      | 0.062 | 0.178 | 0.141  | -0.124 | 0.000  | -0.336 | -1.520 | -0.833 |
| Q3TB48 | Tmem104   | 0.184 | 0.373 | 0.520  | -0.340 | 0.000  | 0.970  | 0.323  | 0.427  |
| A3KMP2 | Ttc38     | 0.005 | 0.039 | -0.216 | 0.000  | 0.035  | -1.560 | -2.530 | -1.630 |
| Q60974 | Ncor1     | 0.231 | 0.436 | -0.323 | 0.025  | 0.000  | -0.567 | -1.790 | -0.112 |
| Q60855 | Ripk1     | 0.652 | 0.929 | 0.790  | 0.000  | -0.944 | 0.818  | -1.660 | -0.584 |
| Q810V0 | Mphosph10 | 0.560 | 0.829 | 0.000  | -0.034 | 0.392  | 0.108  | -0.121 | 0.077  |
| P42128 | Foxk1     | 0.148 | 0.318 | -0.996 | 0.000  | 0.660  | -1.930 | -3.160 | -0.337 |
| P39688 | Fyn       | 0.582 | 0.853 | -0.633 | 0.103  | 0.000  | -0.287 | -0.529 | -0.169 |
| O88842 | Fgd3      | 0.002 | 0.024 | 0.129  | 0.000  | -0.012 | -1.240 | -1.930 | -1.440 |
| Q99LB2 | Dhrs4     | 0.046 | 0.147 | 0.000  | 0.173  | -0.424 | 1.020  | 0.369  | 0.601  |
| Q8C5H8 | Nadk2     | 0.914 | 1.000 | 0.228  | 0.000  | -0.004 | 0.494  | -0.258 | -0.095 |
| Q99JP7 | Ggt7      | 0.000 | 0.008 | -0.382 | 0.079  | 0.000  | 3.770  | 3.880  | 4.330  |
| O54901 | Cd200     | 0.061 | 0.176 | 0.000  | -0.070 | 0.296  | -0.290 | -0.577 | -0.177 |
| Q8R0H9 | Gga1      | 0.483 | 0.746 | 0.000  | -0.245 | 1.100  | 0.656  | -5.080 | 0.722  |
| Q9CYD3 | Crtap     | 0.001 | 0.019 | 0.000  | 1.040  | -0.922 | 5.360  | 4.890  | 5.340  |
| Q9DBU0 | Tm9sf1    | 0.008 | 0.051 | 0.000  | 0.173  | -0.179 | 0.623  | 0.620  | 0.936  |
| A2A5R2 | Arfgef2   | 0.338 | 0.577 | 0.091  | 0.000  | -0.236 | 0.211  | -0.703 | -0.690 |
| Q9DBB4 | Naa16     | 0.660 | 0.936 | 0.000  | 1.260  | -0.821 | 0.296  | 1.320  | -0.120 |
| Q8CJG1 | Ago1      | 0.840 | 1.000 | -0.612 | 1.730  | 0.000  | 0.802  | 1.310  | -0.427 |
| Q3TAA7 | Stk11ip   | 0.010 | 0.061 | 0.014  | -0.019 | 0.000  | -0.701 | -1.570 | -1.160 |
| Q61749 | Eif2b4    | 0.245 | 0.456 | 0.000  | 0.607  | -0.066 | -0.100 | -0.030 | -1.620 |
| Q9JJ80 | Rpf2      | 0.464 | 0.722 | 0.000  | 2.000  | -0.260 | 0.242  | -1.260 | 0.554  |
| Q6VN19 | Ranbp10   | 0.266 | 0.485 | 0.000  | -1.080 | 0.050  | 0.796  | 0.177  | -0.191 |
| Q64700 | Rbl2      | 0.364 | 0.611 | -0.325 | 0.595  | 0.000  | -0.538 | -0.970 | 0.337  |
| Q64697 | Ptpcap    | 0.230 | 0.434 | -0.165 | 0.189  | 0.000  | 0.135  | 0.105  | 0.266  |
| O88738 | Birc6     | 0.391 | 0.640 | 0.401  | 0.000  | -0.399 | 0.604  | -1.420 | -1.120 |
| Q9QXK7 | Cpsf3     | 0.058 | 0.171 | -0.218 | 0.098  | 0.000  | -0.222 | -0.525 | -0.385 |
| O35975 | Art2b     | 0.057 | 0.170 | 0.000  | -0.256 | 0.901  | -1.100 | -1.580 | -0.463 |
| Q9R0Q7 | Ptges3    | 0.026 | 0.105 | -0.221 | 0.085  | 0.000  | -2.030 | -0.845 | -1.090 |
| O70496 | Clcn7     | 0.194 | 0.386 | 0.493  | -0.414 | 0.000  | 0.741  | 0.292  | 0.423  |
| Q9CQE3 | Mrps17    | 0.067 | 0.187 | 0.000  | 1.020  | -0.199 | 0.968  | 1.420  | 1.540  |
| Q8BPS4 | Gpr180    | 0.028 | 0.107 | 0.000  | -3.310 | 0.570  | 3.540  | 2.880  | 3.280  |
| Q80TP3 | Ubr5      | 0.617 | 0.891 | 0.000  | -1.080 | 0.287  | 0.572  | -1.580 | 2.050  |
| Q9JKL4 | Ndufaf3   | 0.124 | 0.284 | 0.000  | -1.040 | 0.623  | 0.737  | 0.694  | 1.040  |
| Q8BTY1 | Kyat1     | 0.005 | 0.039 | -0.231 | 0.533  | 0.000  | -1.400 | -2.010 | -2.310 |
| Q8VD04 | Gripap1   | 0.146 | 0.315 | 0.000  | 0.152  | -0.449 | -0.246 | -1.500 | -0.746 |
| Q8BHC4 | Dcakd     | 0.017 | 0.081 | 0.466  | 0.000  | -1.560 | 2.210  | 1.810  | 2.370  |
| Q61553 | Fscn1     | 0.003 | 0.030 | 0.000  | -0.057 | 0.058  | 2.340  | 1.390  | 1.810  |
| Q8VDI1 | Epsti1    | 0.617 | 0.891 | 0.000  | -3.110 | 0.484  | -0.654 | -2.470 | -1.520 |

| <b>Race</b> | <b>Sex</b> | <b>Age</b> |
|-------------|------------|------------|
| Black       | Male       | 60         |
| Caucasian   | Male       | 61         |
| Black       | Male       | 66         |
| Black       | Female     | 59         |
| Caucasian   | Male       | 61         |
| Black       | Male       | 64         |
| Black       | Male       | 63         |
| Black       | Male       | 51         |
| Black       | Female     | 54         |
| Black       | Female     | 66         |

**Supplementary Table 12. Race, Sex and Age of Donors**



|        |          |       |       |        |        |        |        |        |        |
|--------|----------|-------|-------|--------|--------|--------|--------|--------|--------|
| Q99MK8 | Adrbk1   | 0.014 | 0.073 | 0.104  | 0.000  | -0.048 | -0.465 | -1.150 | -0.916 |
| Q9D1I6 | Mrpl14   | 0.431 | 0.687 | 0.279  | 0.000  | -0.206 | 0.925  | -0.016 | 0.044  |
| Q8BM72 | Hspa13   | 0.001 | 0.015 | 0.000  | 0.147  | -0.238 | 1.210  | 1.070  | 1.230  |
| Q8VE19 | Mios     | 0.833 | 1.000 | 0.167  | -1.300 | 0.000  | -1.170 | -0.653 | 0.273  |
| Q8R4Z4 | Etv3     | 0.143 | 0.309 | -1.260 | 0.000  | 2.930  | 2.380  | 3.170  | 3.030  |
| P97820 | Map4k4   | 0.129 | 0.291 | 0.077  | -0.561 | 0.000  | 1.420  | 0.039  | 0.619  |
| P41216 | Acsl1    | 0.926 | 1.000 | 0.000  | 0.371  | -0.869 | 0.044  | 0.090  | -0.768 |
| Q5SF07 | Igf2bp2  | 0.047 | 0.150 | -0.112 | 3.740  | 0.000  | 5.410  | 4.380  | 4.900  |
| Q8BUV3 | Gphn     | 0.039 | 0.133 | -0.540 | 0.113  | 0.000  | -0.819 | -1.730 | -1.000 |
| Q9DBS5 | Klc4     | 0.089 | 0.227 | 0.147  | -0.698 | 0.000  | -0.502 | -1.210 | -1.180 |
| Q9R020 | Zranb2   | 0.054 | 0.164 | 0.490  | -0.013 | 0.000  | -0.266 | -1.240 | -0.669 |
| P24638 | Acp2     | 0.034 | 0.121 | -0.034 | 0.054  | 0.000  | 0.460  | 0.246  | 0.763  |
| Q9D0D5 | Gtf2e1   | 0.030 | 0.112 | 0.202  | -0.161 | 0.000  | -0.852 | -2.490 | -1.470 |
| P52503 | Ndufs6   | 0.095 | 0.237 | -0.325 | 0.000  | 0.739  | 0.967  | 0.626  | 1.040  |
| Q99LS3 | Psph     | 0.014 | 0.072 | -0.560 | 0.141  | 0.000  | -1.410 | -2.990 | -2.800 |
| Q6A028 | Swap70   | 0.926 | 1.000 | 0.163  | -0.424 | 0.000  | 0.391  | -0.367 | -0.378 |
| Q3UMF0 | Cobl1    | 0.420 | 0.674 | -1.450 | 0.298  | 0.000  | -1.040 | -1.100 | -0.545 |
| Q8R5F3 | Oard1    | 0.041 | 0.138 | 0.000  | -0.160 | 0.309  | -0.415 | -1.080 | -1.560 |
| Q6NTA4 | Rragb    | 0.839 | 1.000 | 0.315  | 0.000  | -0.024 | 0.559  | -0.365 | -0.095 |
| Q80X95 | Rraga    | 0.839 | 1.000 | 0.315  | 0.000  | -0.024 | 0.559  | -0.365 | -0.095 |
| Q8CFT2 | Setd1b   | 0.197 | 0.391 | 0.000  | 0.729  | -0.041 | -0.218 | -0.221 | -2.330 |
| Q9CQ56 | Use1     | 0.012 | 0.069 | -0.371 | 0.000  | 0.230  | 1.080  | 0.697  | 0.796  |
| Q3U186 | Rars2    | 0.906 | 1.000 | 0.398  | -0.283 | 0.000  | 1.060  | -0.833 | -0.334 |
| P62488 | Polr2g   | 0.001 | 0.022 | -0.119 | 0.000  | 0.092  | -0.560 | -0.762 | -0.686 |
| Q9WVM1 | Racgap1  | 0.320 | 0.555 | 1.770  | -0.913 | 0.000  | 2.990  | 0.689  | 0.859  |
| Q61112 | Sdf4     | 0.541 | 0.808 | -0.105 | 0.540  | 0.000  | 0.492  | -0.149 | 0.767  |
| Q924M7 | Mpi      | 0.117 | 0.273 | -0.284 | 0.000  | 0.250  | -0.620 | -2.930 | -0.916 |
| Q8CAY6 | Acat2    | 0.170 | 0.352 | 0.652  | -0.172 | 0.000  | -0.123 | -0.377 | -0.341 |
| Q8R2T8 | Gtf3c5   | 0.023 | 0.096 | -0.196 | 0.161  | 0.000  | -0.379 | -0.708 | -0.482 |
| Q8K4P0 | Wdr33    | 0.948 | 1.000 | -1.110 | 0.000  | 0.822  | -1.840 | 1.850  | -0.538 |
| Q9Z0U1 | Tjp2     | 0.008 | 0.051 | -0.391 | 0.328  | 0.000  | -1.280 | -2.290 | -2.170 |
| Q64516 | Gk       | 0.095 | 0.238 | 0.000  | -0.012 | 0.006  | 0.349  | 0.017  | 0.348  |
| Q8K2F0 | Brd3     | 0.367 | 0.614 | 0.328  | -1.040 | 0.000  | -0.693 | -0.824 | -0.484 |
| Q9JHU9 | Isyna1   | 0.002 | 0.029 | 0.000  | 0.098  | -0.167 | -1.140 | -1.850 | -1.610 |
| Q9D1H7 | Get4     | 0.857 | 1.000 | 0.078  | -0.294 | 0.000  | 0.092  | -0.419 | 0.000  |
| Q9CYN9 | Atp6ap2  | 0.094 | 0.236 | 0.000  | 0.055  | -0.400 | 1.080  | 0.129  | 0.492  |
| Q9WUV0 | Orc5     | 0.343 | 0.582 | 0.199  | 0.000  | -0.561 | -0.287 | -0.714 | -0.241 |
| O88712 | Ctbp1    | 0.008 | 0.052 | 0.000  | -0.306 | 0.027  | -1.060 | -1.940 | -1.410 |
| Q8VEK6 | Ing3     | 0.841 | 1.000 | -2.000 | 0.000  | 0.232  | -0.688 | -1.700 | 0.065  |
| Q6Q783 | Kmt5c    | 0.331 | 0.568 | 0.000  | -0.746 | 0.263  | -0.306 | -0.727 | -0.531 |
| Q91W96 | Anapc4   | 0.893 | 1.000 | 0.000  | -0.318 | 0.245  | 0.275  | -0.305 | 0.058  |
| P56671 | Maz      | 0.246 | 0.457 | -1.300 | 0.426  | 0.000  | 0.187  | 0.273  | 1.070  |
| Q6P1H6 | Ankle2   | 0.334 | 0.571 | 0.000  | -0.919 | 0.452  | 0.030  | 0.201  | 0.880  |
| Q6A065 | Cep170   | 0.998 | 1.000 | 0.069  | -0.070 | 0.000  | 0.013  | -0.627 | 0.616  |
| Q3U5Q7 | Cmpk2    | 0.171 | 0.354 | 0.545  | 0.000  | -0.063 | 0.143  | -0.649 | -0.640 |
| Q9R0A0 | Pex14    | 0.500 | 0.765 | -0.427 | 0.003  | 0.000  | 0.334  | -1.500 | -0.479 |
| A6X919 | Dpy191   | 0.008 | 0.055 | -0.026 | 0.177  | 0.000  | 1.360  | 0.686  | 1.070  |
| Q9R0Q9 | Mpdu1    | 0.207 | 0.404 | 0.000  | -0.009 | 0.020  | 0.421  | -0.073 | 0.373  |
| Q8BK08 | Tmem11   | 0.001 | 0.019 | -0.043 | 0.285  | 0.000  | 1.080  | 0.954  | 1.080  |
| Q9WUH1 | Tmem115  | 0.086 | 0.223 | -0.017 | 0.000  | 0.140  | 0.458  | 0.247  | 1.020  |
| Q8K400 | Stxbp5   | 0.503 | 0.767 | -2.540 | 0.000  | 1.020  | -0.396 | -2.860 | -1.110 |
| Q61122 | Nab1     | 0.355 | 0.598 | -0.983 | 0.000  | 0.250  | -0.976 | -1.240 | -0.108 |
| Q99JT2 | Stk26    | 0.019 | 0.087 | -0.010 | 0.035  | 0.000  | -0.926 | -2.380 | -1.490 |
| Q8R409 | Hexim1   | 0.026 | 0.103 | -0.301 | 0.000  | 0.002  | -0.507 | -0.763 | -1.100 |
| Q80ZV0 | Rnaseh2b | 0.816 | 1.000 | 2.290  | 0.000  | -0.370 | 2.040  | -0.713 | -0.300 |
| P55821 | Stmn2    | 0.078 | 0.208 | 0.511  | -0.166 | 0.000  | -0.361 | -2.580 | -1.480 |
| P54227 | Stmn1    | 0.078 | 0.208 | 0.511  | -0.166 | 0.000  | -0.361 | -2.580 | -1.480 |
| Q8BU30 | Iars     | 0.239 | 0.448 | 0.356  | 0.000  | -0.013 | 0.658  | 0.088  | 0.450  |
| Q61510 | Trim25   | 0.944 | 1.000 | -0.760 | 2.540  | 0.000  | 0.403  | -0.707 | 1.800  |

|        |            |       |       |        |        |        |        |        |        |
|--------|------------|-------|-------|--------|--------|--------|--------|--------|--------|
| Q60649 | Clpb       | 0.990 | 1.000 | 0.421  | 0.000  | -0.108 | 0.340  | -0.304 | 0.289  |
| P23506 | Pcmt1      | 0.001 | 0.022 | -0.179 | 0.000  | 0.198  | -0.923 | -0.926 | -0.835 |
| Q3TC33 | Ccdc127    | 0.031 | 0.114 | -0.180 | 0.197  | 0.000  | 0.651  | 0.308  | 0.506  |
| Q9CQI6 | Cott1      | 0.000 | 0.011 | 0.009  | -0.028 | 0.000  | -1.450 | -1.890 | -1.690 |
| Q8BFQ3 | Gpr68      | 0.340 | 0.579 | -0.551 | 0.216  | 0.000  | -1.070 | -1.480 | 0.309  |
| P61514 | Rpl37a     | 0.417 | 0.671 | 0.000  | -0.469 | 0.078  | 0.438  | -1.460 | -0.984 |
| P70362 | Ufd1l      | 0.819 | 1.000 | 0.000  | 0.014  | -1.410 | -0.501 | -0.022 | -1.310 |
| Q3UVL4 | Vps51      | 0.208 | 0.404 | 0.208  | -1.640 | 0.000  | -0.988 | -2.320 | -1.320 |
| Q6PAQ4 | Rexo4      | 0.491 | 0.755 | 0.000  | 1.990  | -4.510 | 0.958  | 0.732  | 0.192  |
| Q8K3X4 | Irf2bpl    | 0.277 | 0.498 | 0.000  | -0.251 | 0.040  | 0.100  | -0.645 | -0.692 |
| P81183 | Ikzf2      | 0.043 | 0.141 | -0.323 | 0.000  | 0.107  | -0.403 | -0.664 | -0.474 |
| Q921E2 | Rab31      | 0.164 | 0.343 | 0.261  | 0.000  | -0.128 | 1.650  | 0.002  | 0.999  |
| P70122 | Sbds       | 0.148 | 0.318 | 0.000  | -0.375 | 0.036  | -0.198 | -0.845 | -0.521 |
| Q8BYK6 | Ythdf3     | 0.400 | 0.650 | -0.967 | 1.010  | 0.000  | -0.910 | -0.617 | -0.155 |
| Q8CFE4 | Scyl2      | 0.940 | 1.000 | 0.208  | 0.000  | -0.054 | 0.460  | -0.112 | -0.250 |
| Q8BTT6 | Diexf      | 0.150 | 0.320 | 0.268  | -0.494 | 0.000  | -0.240 | -1.120 | -0.670 |
| A2AM29 | Mlit3      | 0.347 | 0.587 | -3.040 | 0.000  | 0.145  | 1.570  | -0.014 | -0.553 |
| P97461 | Rps5       | 0.392 | 0.641 | 0.431  | 0.000  | -0.092 | 0.476  | -0.557 | -0.791 |
| P59016 | Vps33b     | 0.021 | 0.090 | 0.000  | 0.285  | -0.108 | -0.524 | -1.370 | -0.946 |
| Q9CR26 | Vta1       | 0.047 | 0.150 | 0.000  | 0.330  | -0.281 | -0.431 | -0.914 | -0.549 |
| O54984 | Asna1      | 0.442 | 0.698 | 0.075  | 0.000  | -0.446 | 0.147  | -0.143 | 0.099  |
| Q8C827 | Zfp62      | 0.293 | 0.520 | -0.534 | 0.344  | 0.000  | 0.573  | 0.335  | 0.005  |
| O88746 | Tom1       | 0.080 | 0.212 | 0.000  | 0.397  | -0.025 | -0.094 | -1.590 | -1.260 |
| Q78PG9 | Ccdc25     | 0.908 | 1.000 | -3.370 | 0.752  | 0.000  | -0.726 | -1.210 | -1.150 |
| P48453 | Ppp3cb     | 0.034 | 0.122 | -0.837 | 0.064  | 0.000  | -2.010 | -3.260 | -1.390 |
| Q9CY73 | Mrpl44     | 0.009 | 0.057 | 0.000  | 0.358  | -0.175 | 0.827  | 0.770  | 0.815  |
| Q3UIA2 | Arhgap17   | 0.173 | 0.356 | 0.521  | -0.634 | 0.000  | 0.359  | 0.548  | 1.870  |
| Q80U63 | Mfn2       | 1.000 | 1.000 | 0.000  | 0.057  | -0.064 | -0.674 | 0.298  | 0.369  |
| Q9CX00 | Ist1       | 0.541 | 0.807 | 0.000  | -0.229 | 0.048  | 0.269  | -0.707 | -0.339 |
| Q6PDL0 | Dync1li2   | 0.091 | 0.231 | -1.050 | 0.729  | 0.000  | 1.510  | 0.945  | 0.902  |
| Q6PCM2 | Ints6      | 0.035 | 0.124 | -0.670 | 0.000  | 0.128  | -1.040 | -1.070 | -0.853 |
| Q8VE96 | Slc35f6    | 0.285 | 0.509 | 0.589  | -0.450 | 0.000  | 0.607  | -1.970 | -1.740 |
| Q8VDQ8 | Sirt2      | 0.284 | 0.508 | -0.577 | 0.764  | 0.000  | -0.309 | -2.220 | -0.144 |
| Q8VDM1 | Zgpat      | 0.055 | 0.166 | 0.000  | -0.755 | 0.028  | -0.768 | -1.080 | -1.150 |
| Q8BX09 | Rbbp5      | 0.060 | 0.175 | -0.133 | 0.000  | 0.042  | -0.266 | -0.743 | -0.324 |
| Q9D2C7 | Tmbim6     | 0.209 | 0.406 | -0.632 | 0.134  | 0.000  | -0.118 | 0.420  | 0.780  |
| Q8K2C8 | Gpat4      | 0.002 | 0.023 | 0.456  | 0.000  | -0.135 | 2.420  | 1.830  | 1.920  |
| Q9DC71 | Mrps15     | 0.711 | 0.987 | -0.194 | 0.000  | 0.044  | 0.841  | -0.657 | 0.193  |
| Q3TCH7 | Cul4a      | 0.019 | 0.085 | 0.019  | -0.448 | 0.000  | 1.410  | 0.531  | 1.040  |
| Q8R0K4 | Ccdc137    | 0.576 | 0.846 | -3.380 | 0.000  | 0.605  | -0.132 | -0.475 | 0.118  |
| E9Q784 | Zc3h13     | 0.413 | 0.665 | 0.000  | -0.003 | 1.120  | 0.228  | 1.240  | 0.968  |
| Q920A5 | Scpep1     | 0.166 | 0.347 | 0.029  | -0.044 | 0.000  | 0.724  | -0.059 | 0.508  |
| Q9CR59 | Gadd45gip1 | 0.130 | 0.293 | 0.000  | 0.151  | -0.194 | 0.895  | 0.031  | 0.578  |
| Q64131 | Runx3      | 0.617 | 0.891 | 0.000  | 2.480  | -1.840 | 0.041  | 1.500  | 1.260  |
| P70195 | Psmb7      | 0.075 | 0.202 | 0.000  | 0.109  | -0.848 | -0.791 | -1.820 | -1.190 |
| Q9WTL7 | Lypla2     | 0.069 | 0.191 | -0.604 | 1.470  | 0.000  | -1.450 | -2.490 | -0.908 |
| Q8BVU5 | Nudt9      | 0.155 | 0.330 | 0.000  | -0.351 | 0.224  | 0.896  | 2.140  | 0.089  |
| O70378 | Emc8       | 0.013 | 0.070 | -0.015 | 0.398  | 0.000  | 1.360  | 0.752  | 1.150  |
| Q8BVA5 | Ldah       | 0.407 | 0.658 | 0.000  | 0.014  | -0.054 | 0.285  | -1.310 | -0.310 |
| P39428 | Traf1      | 0.026 | 0.103 | 0.000  | 0.232  | -0.135 | -0.817 | -1.800 | -0.841 |
| Q9ES74 | Nek7       | 0.578 | 0.849 | 0.000  | -0.083 | 0.235  | 0.231  | -0.367 | -0.069 |
| P70428 | Ext2       | 0.130 | 0.293 | 0.004  | -4.570 | 0.000  | 1.530  | 1.060  | 1.580  |
| Q8BFQ6 | Dirc2      | 0.209 | 0.405 | 0.419  | 0.000  | -0.130 | 0.891  | 0.085  | 0.610  |
| Q2TPA8 | Hsd1l2     | 0.861 | 1.000 | 0.190  | -0.464 | 0.000  | 0.705  | -0.463 | -0.284 |
| P48725 | Pcnt       | 0.954 | 1.000 | 0.634  | -3.730 | 0.000  | 0.667  | -2.740 | -1.330 |
| Q8R344 | Ccdc12     | 0.022 | 0.094 | 0.045  | -0.401 | 0.000  | -0.707 | -1.280 | -1.590 |
| Q9Z172 | Sumo3      | 0.504 | 0.768 | 0.000  | 0.965  | -0.168 | -0.170 | -3.010 | 1.160  |
| Q80ZD3 | Slc26a11   | 0.066 | 0.185 | -0.440 | 0.256  | 0.000  | 0.382  | 0.561  | 1.090  |
| Q9WU28 | Pfdn5      | 0.026 | 0.104 | 0.337  | 0.000  | -0.011 | -0.630 | -0.847 | -0.279 |

|        |          |       |       |        |        |        |        |        |        |
|--------|----------|-------|-------|--------|--------|--------|--------|--------|--------|
| Q9CQE7 | Ergic3   | 0.027 | 0.105 | 0.103  | -0.420 | 0.000  | 0.997  | 0.398  | 0.714  |
| P70269 | Ctse     | 0.222 | 0.423 | 0.292  | 0.000  | -0.683 | -0.227 | -1.010 | -0.757 |
| Q4QRL3 | Ccdc88b  | 0.044 | 0.142 | 0.000  | 0.221  | -0.969 | -2.650 | -4.350 | -1.550 |
| P18052 | Ptpra    | 0.075 | 0.202 | -0.163 | 0.203  | 0.000  | 0.660  | 0.156  | 0.735  |
| Q8BIH0 | Sap130   | 0.032 | 0.117 | 0.000  | -0.146 | 1.120  | 1.420  | 1.820  | 1.790  |
| Q99MU3 | Adar     | 0.004 | 0.038 | -0.077 | 0.000  | 0.110  | -1.330 | -1.330 | -0.753 |
| Q811M1 | Arhgap15 | 0.024 | 0.097 | 0.063  | -0.056 | 0.000  | -0.320 | -0.940 | -0.689 |
| Q14AX6 | Cdk12    | 0.354 | 0.596 | 0.044  | -0.085 | 0.000  | 0.080  | -0.202 | -0.290 |
| Q3TC72 | Fahd2    | 0.460 | 0.719 | 0.000  | 0.309  | -0.221 | 0.143  | 0.026  | 0.366  |
| Q921I2 | Klhdc4   | 0.441 | 0.697 | 0.550  | -0.537 | 0.000  | 1.260  | -0.103 | 0.190  |
| Q9D0I8 | Mrto4    | 0.098 | 0.242 | 0.240  | 0.000  | -0.243 | -0.157 | -0.805 | -0.552 |
| Q8CIC2 | Nupl2    | 0.671 | 0.949 | -1.300 | 0.382  | 0.000  | -4.180 | 2.690  | 4.170  |
| Q8C092 | Taf5     | 0.864 | 1.000 | -0.202 | 2.780  | 0.000  | 1.600  | 0.516  | -0.136 |
| P97492 | Rgs14    | 0.001 | 0.019 | -0.396 | 0.195  | 0.000  | -2.050 | -1.910 | -1.620 |
| Q9R1C6 | Dgke     | 0.653 | 0.929 | 0.000  | 2.230  | -1.630 | 0.861  | 0.474  | 0.905  |
| Q61205 | Pafah1b3 | 0.001 | 0.019 | -0.071 | 0.230  | 0.000  | -0.968 | -1.320 | -1.130 |
| Q9D8S9 | Bola1    | 0.460 | 0.719 | 0.000  | -2.370 | 0.187  | 1.050  | -0.214 | -0.646 |
| Q9R1S3 | Pign     | 0.869 | 1.000 | -2.550 | 0.000  | 5.880  | -3.330 | 7.380  | -3.010 |
| Q9CR68 | Uqcrfs1  | 0.007 | 0.048 | 0.000  | 0.074  | -0.106 | 0.656  | 0.355  | 0.524  |
| Q8C7Q4 | Rbm4     | 0.306 | 0.538 | -0.094 | 0.211  | 0.000  | -0.147 | -0.129 | 0.023  |
| Q80TN4 | Dnajc16  | 0.527 | 0.793 | 0.000  | 3.370  | -3.120 | 0.741  | 1.600  | 1.870  |
| Q8CJ40 | Crocc    | 0.148 | 0.318 | 0.071  | 0.000  | -0.008 | 0.321  | 0.014  | 0.498  |
| Q9JY4  | Ddx20    | 0.299 | 0.528 | -0.178 | 0.000  | 0.117  | 0.198  | -0.676 | -0.663 |
| Q9CQZ5 | Ndufa6   | 0.233 | 0.438 | 0.000  | 0.678  | -0.132 | 0.410  | 0.479  | 0.879  |
| Q6PAR5 | Gapvd1   | 0.538 | 0.806 | 0.400  | 0.000  | -0.331 | 0.219  | -0.246 | -0.508 |
| Q8CE46 | Pus7l    | 0.019 | 0.087 | 0.615  | -0.188 | 0.000  | -0.920 | -2.350 | -2.310 |
| Q922H4 | Gmppa    | 0.029 | 0.112 | 0.060  | -0.305 | 0.000  | -0.535 | -1.460 | -1.280 |
| Q64455 | Ptprj    | 0.728 | 1.000 | 0.025  | 0.000  | -1.110 | -0.320 | -0.571 | -0.618 |
| P63323 | Rps12    | 0.343 | 0.582 | -1.410 | 0.000  | 0.032  | -1.460 | -0.606 | -1.040 |
| Q9Z148 | Ehmt2    | 0.654 | 0.930 | -0.141 | 0.000  | 0.802  | -0.151 | -0.571 | 0.696  |
| Q9JI78 | Ngly1    | 0.004 | 0.037 | -0.505 | 0.000  | 0.109  | -1.300 | -1.710 | -1.850 |
| Q99N89 | Mrpl43   | 0.003 | 0.030 | 0.000  | 0.185  | -0.319 | 1.180  | 0.974  | 1.330  |
| O88879 | Apaf1    | 0.004 | 0.033 | 0.100  | -0.012 | 0.000  | -0.683 | -1.230 | -1.050 |
| P56382 | Atp5e    | 0.000 | 0.013 | 0.000  | 0.115  | -0.081 | 0.914  | 0.754  | 0.858  |
| Q8BK58 | Hspbap1  | 0.857 | 1.000 | -0.469 | 0.577  | 0.000  | 1.280  | -0.737 | -0.052 |
| P30355 | Alox5ap  | 0.424 | 0.678 | 0.786  | 0.000  | -0.301 | 1.160  | 0.291  | 0.218  |
| P51829 | Adcy7    | 0.555 | 0.824 | -0.535 | 0.000  | 0.058  | -0.200 | -0.585 | -0.144 |
| P61294 | Rab6b    | 0.031 | 0.116 | -0.459 | 0.121  | 0.000  | -1.130 | -0.840 | -0.616 |
| Q9D4H8 | Cul2     | 0.495 | 0.760 | -1.430 | 1.200  | 0.000  | 0.568  | -1.510 | -1.640 |
| Q8CES0 | Naa30    | 0.115 | 0.270 | -0.122 | 0.000  | 0.086  | -0.325 | -1.500 | -0.472 |
| Q9D659 | Vsir     | 0.049 | 0.154 | -0.084 | 0.110  | 0.000  | -0.152 | -0.651 | -0.493 |
| Q9Z129 | Recql    | 0.224 | 0.426 | 0.000  | -0.274 | 0.511  | -0.249 | -1.960 | -0.223 |
| P62274 | Rps29    | 0.691 | 0.967 | 0.000  | 0.231  | -0.784 | -0.246 | -0.324 | -0.381 |
| Q91YJ3 | Thyn1    | 0.253 | 0.466 | 0.000  | -0.137 | 0.320  | -0.121 | -0.330 | -0.020 |
| Q61508 | Ecm1     | 0.050 | 0.155 | 0.000  | 0.399  | -0.581 | 0.993  | 0.600  | 0.775  |
| Q3UHD6 | Snx27    | 0.771 | 1.000 | -0.204 | 0.000  | 0.423  | -1.050 | -0.625 | 1.220  |
| Q9JKN1 | Slc30a7  | 0.061 | 0.176 | 0.000  | 0.548  | -0.468 | 1.350  | 0.531  | 1.200  |
| P47930 | Fosl2    | 0.051 | 0.158 | -0.388 | 0.000  | 0.238  | 0.409  | 0.428  | 0.671  |
| Q9WV84 | Nme4     | 0.027 | 0.105 | 1.300  | -1.640 | 0.000  | 3.340  | 2.630  | 2.720  |
| B1AVZ0 | Uppt     | 0.350 | 0.591 | 0.000  | -0.111 | 0.166  | 0.131  | -0.627 | -0.192 |
| Q00422 | Gabpa    | 0.266 | 0.485 | -0.698 | 0.165  | 0.000  | -0.673 | -0.617 | -0.342 |
| Q9CWN7 | Cnot11   | 0.150 | 0.320 | 0.000  | -0.054 | 0.281  | 0.098  | -2.610 | -1.490 |
| Q9D1P2 | Kat8     | 0.635 | 0.912 | 0.000  | 1.430  | -0.154 | 0.253  | -0.149 | 0.359  |
| Q9DAK9 | Phpt1    | 0.001 | 0.014 | -0.073 | 0.450  | 0.000  | -2.300 | -2.910 | -3.060 |
| Q8BYC6 | Taok3    | 0.583 | 0.855 | 0.000  | 0.347  | -0.177 | 0.237  | -0.245 | -0.214 |
| Q9CTH6 | Fcf1     | 0.015 | 0.076 | 0.162  | -0.174 | 0.000  | -0.675 | -0.546 | -0.377 |
| Q9CCK9 | Rbm33    | 0.775 | 1.000 | 0.000  | -0.130 | 1.580  | 0.673  | 0.060  | 1.320  |
| Q9D1B9 | Mrpl28   | 0.304 | 0.534 | 0.000  | 0.671  | -1.410 | 0.836  | 0.095  | 0.635  |
| P57787 | Slc16a3  | 0.600 | 0.873 | 0.578  | 0.000  | -3.850 | -0.543 | 0.643  | -0.876 |

|        |         |       |       |        |        |        |        |        |        |
|--------|---------|-------|-------|--------|--------|--------|--------|--------|--------|
| Q91W86 | Vps11   | 0.178 | 0.364 | 0.000  | 0.651  | -0.315 | -0.712 | -0.050 | -0.625 |
| O70469 | Dok2    | 0.058 | 0.172 | -0.026 | 0.000  | 0.092  | -0.602 | -1.430 | -2.690 |
| Q61179 | Irf9    | 0.154 | 0.327 | 0.021  | -0.204 | 0.000  | -0.140 | -1.020 | -0.437 |
| Q80U87 | Usp8    | 0.729 | 1.000 | 0.000  | -0.253 | 0.161  | 0.513  | -0.883 | -0.191 |
| Q9CWP6 | Mospd2  | 0.067 | 0.187 | -1.080 | 0.277  | 0.000  | 1.090  | 0.599  | 2.170  |
| Q6ZWM4 | Lsm8    | 0.003 | 0.032 | -0.155 | 0.000  | 0.168  | -0.915 | -1.470 | -1.420 |
| Q9CQZ0 | Ormdl2  | 0.062 | 0.179 | 0.000  | 0.413  | -0.174 | 1.130  | 0.665  | 0.468  |
| O54988 | Slk     | 0.686 | 0.963 | -0.072 | 0.488  | 0.000  | -0.441 | 0.770  | 0.635  |
| Q8BGQ1 | Vipas39 | 0.027 | 0.107 | 0.014  | -0.411 | 0.000  | -1.310 | -1.870 | -0.768 |
| Q60692 | Psmb6   | 0.528 | 0.795 | 0.114  | 0.000  | -0.437 | -0.196 | -0.763 | 0.035  |
| Q3UXZ9 | Kdm5a   | 0.036 | 0.126 | -1.040 | 0.237  | 0.000  | -1.650 | -3.230 | -1.830 |
| Q922R5 | Ppp4r3b | 0.120 | 0.276 | -0.578 | 0.000  | 0.820  | -0.544 | -3.400 | -1.380 |
| Q8R4E9 | Cdt1    | 0.525 | 0.791 | -0.052 | 0.000  | 1.510  | 0.633  | 0.311  | -0.962 |
| Q8BIG7 | Comtd1  | 0.937 | 1.000 | 0.000  | 0.166  | -0.276 | 0.673  | -0.609 | -0.276 |
| P28843 | Dpp4    | 0.067 | 0.186 | -0.165 | 0.000  | 0.192  | -0.310 | -0.587 | -0.216 |
| Q8K2D3 | Edc3    | 0.186 | 0.376 | 0.000  | 0.370  | -0.732 | -0.284 | -2.170 | -0.966 |
| Q5IRJ6 | Slc30a9 | 0.003 | 0.030 | 0.000  | 0.577  | -0.728 | 2.360  | 2.540  | 2.810  |
| Q9CXY9 | Pigk    | 0.948 | 1.000 | 0.000  | 0.302  | -1.030 | 1.300  | -1.050 | -0.800 |
| Q8QZY6 | Tspan14 | 0.105 | 0.252 | 0.000  | 0.194  | -0.577 | -0.743 | -0.701 | -0.480 |
| Q9D2D7 | Znf687  | 0.027 | 0.107 | -0.869 | 0.000  | 0.043  | -1.140 | -1.420 | -1.520 |
| Q32NY4 | Cnm3    | 0.062 | 0.179 | 0.143  | 0.000  | -0.041 | 0.185  | 0.199  | 0.396  |
| Q63810 | Ppp3r1  | 0.027 | 0.106 | 0.029  | 0.000  | -0.303 | -0.823 | -0.787 | -1.610 |
| Q9DB40 | Med27   | 0.112 | 0.265 | -0.150 | 0.455  | 0.000  | 0.392  | 0.886  | 0.476  |
| Q8R480 | Nup85   | 0.020 | 0.089 | 0.000  | -0.337 | 0.052  | -0.995 | -2.360 | -1.570 |
| Q8K339 | Kin     | 0.040 | 0.134 | 0.000  | 0.000  | 0.258  | -0.190 | -0.860 | -0.618 |
| Q8BJW5 | Nol11   | 0.203 | 0.399 | 0.000  | 0.243  | -0.456 | -0.152 | -1.030 | -0.521 |
| Q9CVD2 | Atxn3   | 0.128 | 0.290 | 0.000  | 2.050  | -1.220 | -2.050 | -2.400 | -0.837 |
| P12399 | Ctla2a  | 0.017 | 0.081 | 0.000  | 0.559  | -1.130 | -2.010 | -3.210 | -2.490 |
| Q924D0 | Rtn4ip1 | 0.540 | 0.807 | 0.000  | 0.155  | -0.927 | 0.162  | -2.980 | -0.090 |
| P15535 | B4galt1 | 0.213 | 0.410 | -0.367 | 0.178  | 0.000  | 0.336  | 0.153  | 0.102  |
| Q8CBC4 | Cnst    | 0.009 | 0.057 | -0.306 | 0.000  | 0.270  | -0.789 | -1.300 | -1.290 |
| Q8VDY9 | Caap1   | 0.372 | 0.621 | -0.225 | 0.000  | 0.447  | -0.044 | -0.844 | 0.064  |
| Q8R2Q8 | Bst2    | 0.003 | 0.033 | 0.189  | -0.754 | 0.000  | 2.100  | 1.580  | 1.960  |
| Q5U3K5 | Rabl6   | 0.406 | 0.658 | 1.260  | -2.210 | 0.000  | 1.200  | -3.130 | -4.630 |
| Q8BZ98 | Dnm3    | 0.116 | 0.271 | 0.100  | 0.000  | -0.235 | 0.384  | 0.055  | 0.252  |
| Q9D023 | Mpc2    | 0.034 | 0.121 | 0.000  | 0.091  | -0.908 | 0.954  | 0.558  | 0.976  |
| O70493 | Snx12   | 0.150 | 0.321 | -0.260 | 0.065  | 0.000  | -0.143 | -0.807 | -0.403 |
| Q9DBY1 | Syvn1   | 0.020 | 0.087 | 0.000  | 0.682  | -0.142 | 1.310  | 1.110  | 1.100  |
| Q5H8C4 | Vps13a  | 0.282 | 0.505 | -0.287 | 3.230  | 0.000  | -3.080 | -0.289 | 0.484  |
| Q99KX1 | Mlf2    | 0.315 | 0.549 | 0.000  | -0.307 | 0.193  | -0.085 | -0.336 | -0.256 |
| Q60596 | Xrcc1   | 0.290 | 0.517 | 0.023  | -0.284 | 0.000  | 0.104  | -0.792 | -0.651 |
| P59481 | Lman2l  | 0.552 | 0.821 | 0.000  | 0.129  | -0.521 | 0.946  | -8.880 | 1.110  |
| P97789 | Xrn1    | 0.074 | 0.201 | 0.000  | -0.143 | 0.334  | -0.210 | -0.476 | -0.909 |
| Q99K01 | Pdxdc1  | 0.918 | 1.000 | 0.000  | -0.172 | 0.089  | 1.040  | -0.335 | -0.985 |
| Q8CIG3 | Kdm1b   | 0.705 | 0.982 | 0.120  | -1.320 | 0.000  | -1.960 | -1.000 | 0.665  |
| Q9CZT6 | Cmss1   | 0.064 | 0.183 | 0.000  | -1.570 | 0.227  | -1.610 | -2.350 | -1.960 |
| Q99KK1 | Reep3   | 0.256 | 0.470 | 0.000  | -2.660 | 0.078  | 0.631  | 0.147  | 0.263  |
| Q6P5G6 | Ubxn7   | 0.109 | 0.260 | 0.000  | 1.210  | -0.071 | -1.190 | -0.345 | -0.395 |
| Q8K2Y7 | Mrpl47  | 0.048 | 0.152 | 0.000  | 0.273  | -0.157 | 1.070  | 0.895  | 0.325  |
| Q9CPQ1 | Cox6c   | 0.008 | 0.052 | 0.000  | 0.148  | -0.102 | 0.358  | 0.542  | 0.504  |
| O54833 | Csnk2a2 | 0.725 | 1.000 | 0.164  | -0.263 | 0.000  | 0.721  | -0.602 | -0.770 |
| Q9CRG1 | Tm7sf3  | 0.667 | 0.945 | 0.418  | -0.002 | 0.000  | 0.609  | -0.354 | -0.319 |
| Q9CQA5 | Med4    | 0.999 | 1.000 | 0.000  | -2.040 | 1.460  | 0.168  | -1.730 | 0.990  |
| Q60676 | Ppp5c   | 0.129 | 0.291 | 0.000  | -1.090 | 0.502  | -0.225 | -4.320 | -4.210 |
| P62743 | Ap2s1   | 0.350 | 0.592 | 0.421  | -1.680 | 0.000  | 0.710  | 0.072  | 0.099  |
| Q99N85 | Mrps18a | 0.010 | 0.060 | 0.176  | -0.091 | 0.000  | 0.951  | 0.506  | 0.708  |
| Q9CR11 | Yeats4  | 0.614 | 0.888 | 0.000  | 2.770  | -1.020 | -0.268 | 1.670  | 2.690  |
| Q9D8X2 | Ccdc124 | 0.201 | 0.397 | 0.000  | -0.531 | 0.050  | -0.129 | -1.780 | -0.916 |
| Q9D832 | Dnajb4  | 0.901 | 1.000 | 0.150  | 0.000  | -0.565 | 0.480  | -0.352 | -0.401 |

|        |          |       |       |        |        |        |        |        |        |
|--------|----------|-------|-------|--------|--------|--------|--------|--------|--------|
| A2A8Z1 | Osbp19   | 0.215 | 0.412 | 0.344  | 0.000  | -0.424 | 0.033  | -0.872 | -0.935 |
| P14069 | S100a6   | 0.187 | 0.376 | -0.046 | 0.238  | 0.000  | -0.128 | -0.390 | 0.011  |
| O55100 | Syng1    | 0.000 | 0.013 | 0.248  | -0.546 | 0.000  | 4.430  | 3.640  | 4.470  |
| Q6PB44 | Ptpn23   | 0.645 | 0.922 | 0.000  | 0.015  | -0.813 | 0.790  | -0.854 | 0.086  |
| P63030 | Mpc1     | 0.002 | 0.028 | 0.158  | -0.024 | 0.000  | 1.540  | 0.979  | 1.210  |
| Q921N7 | Tmem70   | 0.029 | 0.111 | -0.295 | 3.890  | 0.000  | 5.300  | 5.780  | 6.340  |
| Q9D920 | Borcs5   | 0.162 | 0.340 | 0.264  | -0.348 | 0.000  | -0.244 | -0.500 | -0.331 |
| Q9CRA4 | Msmo1    | 0.001 | 0.019 | 0.000  | -1.340 | 0.329  | 4.080  | 4.320  | 4.870  |
| P97346 | Nxn      | 0.333 | 0.570 | 0.333  | 0.000  | -1.090 | -2.170 | 0.304  | -1.790 |
| Q91VX2 | Ubap2    | 0.246 | 0.457 | 0.280  | -0.451 | 0.000  | 0.798  | -0.235 | 1.300  |
| Q9R0Q6 | Arpc1a   | 0.701 | 0.977 | 0.000  | 0.404  | -0.663 | -0.086 | -0.302 | -0.265 |
| Q9CYK1 | Wars2    | 0.461 | 0.720 | -0.361 | 0.518  | 0.000  | 0.617  | -0.291 | 0.913  |
| Q7TMQ7 | Wdr91    | 0.770 | 1.000 | 0.000  | 0.261  | -0.766 | -0.437 | -1.500 | 0.756  |
| Q6DFX2 | Antxr2   | 0.938 | 1.000 | 0.081  | -4.330 | 0.000  | 0.051  | -0.084 | -3.740 |
| Q6PCN7 | Hltf     | 0.161 | 0.339 | -0.167 | 0.000  | 0.167  | -0.166 | -2.240 | -0.792 |
| Q99LI8 | Hgs      | 0.616 | 0.891 | 0.000  | -3.760 | 1.220  | 0.693  | -0.749 | 0.054  |
| O70456 | Sfn      | 0.035 | 0.123 | 0.000  | -0.144 | 0.061  | -0.606 | -2.040 | -1.400 |
| Q6NVF4 | Helb     | 0.030 | 0.113 | 0.000  | 0.432  | -0.446 | -3.290 | -2.260 | -1.130 |
| Q61586 | Gpam     | 0.000 | 0.012 | 0.000  | -0.259 | 0.263  | 2.000  | 1.940  | 2.100  |
| Q8VC70 | Rbms2    | 0.050 | 0.155 | 0.875  | -3.560 | 0.000  | 4.120  | 2.420  | 2.850  |
| Q8VDV8 | Mitd1    | 0.674 | 0.950 | 0.863  | 0.000  | -0.130 | -0.222 | 0.264  | 0.219  |
| A2BDX3 | Mocs3    | 0.016 | 0.079 | -0.131 | 0.015  | 0.000  | -0.574 | -0.554 | -0.274 |
| P63073 | Eif4e    | 0.110 | 0.261 | 0.056  | 0.000  | -0.079 | -0.067 | -0.746 | -0.443 |
| Q8BYL4 | Yars2    | 0.539 | 0.807 | 0.319  | -1.240 | 0.000  | 0.125  | -1.890 | -0.671 |
| Q9JHI9 | Slc40a1  | 0.774 | 1.000 | 1.360  | -0.984 | 0.000  | 1.010  | -0.349 | 0.438  |
| P41233 | Abca1    | 0.053 | 0.162 | 2.580  | -1.450 | 0.000  | 3.720  | 3.300  | 3.800  |
| Q8C052 | Map1s    | 0.324 | 0.559 | 1.440  | 0.000  | -0.235 | -2.860 | 0.557  | -0.363 |
| Q80TA6 | Mtmr12   | 0.017 | 0.081 | -0.216 | 0.000  | 0.039  | -0.710 | -1.700 | -1.270 |
| Q920L1 | Fads1    | 0.002 | 0.022 | 0.753  | 0.000  | -1.200 | 4.390  | 4.140  | 4.320  |
| Q6NZQ4 | Paxip1   | 0.002 | 0.024 | -0.702 | 0.000  | 0.105  | -2.740 | -2.460 | -2.170 |
| Q9D786 | Haus5    | 0.097 | 0.240 | -0.007 | 0.000  | 0.031  | -0.178 | -1.330 | -0.640 |
| A2AGH6 | Med12    | 0.669 | 0.947 | -0.883 | 0.364  | 0.000  | -0.436 | -0.859 | 0.129  |
| Q8VDG5 | Ppcs     | 0.001 | 0.015 | 0.000  | -0.088 | 0.459  | -1.780 | -2.250 | -2.160 |
| Q8BX17 | Gemin5   | 0.136 | 0.300 | 0.000  | -0.197 | 0.340  | -0.034 | -0.557 | -0.653 |
| Q60949 | Tbc1d1   | 0.929 | 1.000 | -2.370 | 0.000  | 0.522  | -0.861 | 0.527  | -1.210 |
| P34152 | Ptk2     | 0.297 | 0.524 | 0.207  | 0.000  | -0.153 | 0.088  | -0.575 | -0.244 |
| Q8VCH6 | Dhcr24   | 0.003 | 0.030 | -1.970 | 0.475  | 0.000  | 4.270  | 4.540  | 4.840  |
| Q3UFY7 | Nt5c3b   | 0.132 | 0.296 | 1.580  | 0.000  | -1.680 | 2.400  | 1.420  | 1.670  |
| P36536 | Sar1a    | 0.972 | 1.000 | 0.038  | -1.740 | 0.000  | -0.594 | -0.758 | -0.420 |
| O70433 | Fhl2     | 0.300 | 0.529 | 0.301  | -2.800 | 0.000  | 1.230  | -0.207 | 0.303  |
| P47811 | Mapk14   | 0.232 | 0.436 | 0.000  | 0.568  | -0.624 | -3.770 | -0.803 | -0.291 |
| Q9ERI6 | Rdh14    | 0.189 | 0.379 | 0.000  | 0.132  | -0.126 | -0.072 | -0.191 | -0.680 |
| O88561 | Slc27a3  | 0.002 | 0.025 | 0.000  | 1.250  | -0.059 | 3.450  | 3.940  | 4.190  |
| Q8C1E7 | Tmem120a | 0.021 | 0.090 | 0.000  | 1.190  | -0.322 | 3.090  | 2.270  | 1.920  |
| P97765 | Wbp2     | 0.002 | 0.024 | -0.004 | 0.131  | 0.000  | -1.010 | -1.590 | -1.550 |
| Q3U0M1 | Trappc9  | 0.817 | 1.000 | -0.454 | 0.109  | 0.000  | -0.300 | -0.560 | 0.289  |
| Q8R313 | Exoc6    | 0.164 | 0.343 | 0.374  | 0.000  | -0.064 | -5.790 | -1.000 | -1.050 |
| A6X8Z5 | Arhgap31 | 0.879 | 1.000 | 1.430  | -1.790 | 0.000  | 0.384  | -2.660 | 2.810  |
| Q9D6U8 | Fam162a  | 0.000 | 0.013 | -0.044 | 0.195  | 0.000  | 1.030  | 0.901  | 0.963  |
| Q8K3C3 | Lzic     | 0.143 | 0.310 | 0.371  | -1.190 | 0.000  | -0.852 | -1.480 | -1.240 |
| Q9D125 | Mrps25   | 0.125 | 0.285 | 5.570  | -3.410 | 0.000  | 6.160  | 5.650  | 5.610  |
| Q9R049 | Amfr     | 0.388 | 0.636 | -0.100 | 0.870  | 0.000  | 0.513  | 0.788  | 0.419  |
| Q9DB34 | Chmp2a   | 0.798 | 1.000 | 0.119  | -0.014 | 0.000  | 0.221  | -0.174 | 0.165  |
| Q5U4C3 | Scaf1    | 0.618 | 0.892 | 0.000  | -0.994 | 0.360  | 0.667  | -1.780 | -0.847 |
| Q8BKX6 | Smg1     | 0.474 | 0.733 | 0.353  | -1.190 | 0.000  | -0.243 | -1.940 | -0.363 |
| P49586 | Pcyt1a   | 0.554 | 0.822 | 0.423  | 0.000  | -0.798 | 0.117  | -0.722 | -0.634 |
| Q9DC29 | Abcb6    | 0.117 | 0.272 | 0.022  | -0.201 | 0.000  | -0.174 | -0.821 | -0.399 |
| O54998 | Fkbp7    | 0.022 | 0.095 | -0.509 | 2.610  | 0.000  | 4.180  | 3.980  | 4.750  |
| Q8VDZ4 | Zdhhc5   | 0.251 | 0.463 | 0.000  | -0.624 | 1.340  | 0.439  | 1.390  | 1.660  |

|        |          |       |       |        |        |        |        |        |        |
|--------|----------|-------|-------|--------|--------|--------|--------|--------|--------|
| Q61037 | Tsc2     | 0.494 | 0.759 | -0.314 | 0.000  | 0.272  | 0.238  | -0.069 | 0.232  |
| Q9CZ57 | Nsun4    | 0.430 | 0.686 | 0.129  | -1.190 | 0.000  | 0.559  | -0.895 | 1.310  |
| P62309 | Snrpg    | 0.091 | 0.232 | 0.000  | 0.621  | -0.692 | -0.743 | -1.190 | -0.818 |
| Q80U70 | Suz12    | 0.113 | 0.266 | 0.000  | 0.065  | -0.310 | -0.990 | -2.960 | -0.684 |
| O35344 | Kpna3    | 0.032 | 0.118 | 0.000  | 0.111  | -0.203 | -0.415 | -1.000 | -0.587 |
| Q9DAT5 | Trmu     | 0.965 | 1.000 | 0.330  | -0.121 | 0.000  | 0.746  | -0.391 | -0.095 |
| O88811 | Stam2    | 0.844 | 1.000 | 0.793  | -0.066 | 0.000  | -2.650 | 4.530  | 0.183  |
| P52623 | Uck1     | 0.106 | 0.254 | 0.000  | -0.181 | 0.131  | -0.078 | -0.618 | -0.720 |
| Q60575 | Kif1b    | 0.549 | 0.817 | 0.000  | 0.476  | -0.013 | 1.190  | -2.150 | -0.500 |
| Q8BZQ7 | Anapc2   | 0.858 | 1.000 | 0.000  | 0.388  | -1.980 | 1.800  | -1.690 | -2.560 |
| P26011 | Itgb7    | 0.206 | 0.403 | -0.370 | 1.190  | 0.000  | -0.580 | -0.272 | -0.497 |
| B2RX14 | Zcchc11  | 0.288 | 0.513 | 0.813  | -0.294 | 0.000  | 0.265  | -2.670 | -0.521 |
| O35130 | Emg1     | 0.066 | 0.186 | 0.220  | -0.200 | 0.000  | -0.494 | -2.150 | -1.090 |
| Q8CD26 | Slc35e1  | 0.070 | 0.193 | 1.180  | -0.035 | 0.000  | 2.010  | 1.630  | 1.070  |
| Q69ZC8 | Gpalpp1  | 0.047 | 0.150 | -0.158 | 1.170  | 0.000  | 3.410  | 1.640  | 1.870  |
| Q9JM13 | Rabgef1  | 0.270 | 0.489 | 0.000  | 0.936  | -0.963 | 0.109  | -2.890 | -1.190 |
| Q5SS80 | Dhrs13   | 0.001 | 0.019 | -0.233 | 0.000  | 0.067  | 1.520  | 1.110  | 1.520  |
| Q3UE37 | Ube2z    | 0.134 | 0.298 | 0.000  | -0.126 | 0.232  | 0.110  | -2.060 | -2.380 |
| Q7TN58 | Tmc8     | 0.075 | 0.202 | -0.585 | 0.000  | 0.174  | -1.240 | -1.290 | -0.445 |
| Q8BLR5 | Psd4     | 0.060 | 0.175 | 0.000  | -0.228 | 0.469  | -1.850 | -2.990 | -0.583 |
| Q3UL36 | Arglu1   | 0.210 | 0.407 | 0.098  | -0.107 | 0.000  | 0.196  | -0.943 | -1.200 |
| P34884 | Mif      | 0.193 | 0.385 | -0.437 | 0.000  | 0.174  | -0.562 | -4.920 | -1.210 |
| Q8VC65 | Nrm      | 0.086 | 0.222 | 0.000  | 0.145  | -0.254 | 0.254  | 0.325  | 0.165  |
| Q03141 | Mark3    | 0.872 | 1.000 | 0.347  | 0.000  | -0.830 | 0.273  | -0.380 | -0.172 |
| Q3TWF6 | Wdr70    | 0.840 | 1.000 | 0.000  | 2.870  | -1.380 | 0.191  | 1.450  | -1.090 |
| Q99NH0 | Ankrd17  | 0.978 | 1.000 | 0.000  | -0.078 | 0.040  | 0.641  | -0.560 | -0.088 |
| Q9D1R1 | Tmem126b | 0.441 | 0.698 | 0.146  | -0.371 | 0.000  | -0.573 | 0.779  | 0.798  |
| Q99LI9 | Clp1     | 0.049 | 0.154 | 0.000  | -0.466 | 0.106  | -0.628 | -0.539 | -0.741 |
| Q8BK12 | Tnrc6b   | 0.181 | 0.368 | 0.385  | -0.531 | 0.000  | -0.390 | -0.386 | -0.939 |
| O35216 | Cenpa    | 0.114 | 0.268 | 0.001  | -0.082 | 0.000  | -0.253 | -0.531 | -0.092 |
| Q6PIJ4 | Nfrkb    | 0.972 | 1.000 | -1.190 | 0.727  | 0.000  | 0.003  | -0.075 | -0.451 |
| Q3U487 | Hectd3   | 0.509 | 0.773 | -0.887 | 0.876  | 0.000  | 0.088  | -1.320 | -0.223 |
| P59178 | L3mbtl2  | 0.800 | 1.000 | 0.000  | 0.358  | -1.860 | 0.594  | -0.726 | -2.230 |
| A6H630 | Armt1    | 0.012 | 0.067 | 0.101  | -0.391 | 0.000  | -1.820 | -4.060 | -3.390 |
| P83887 | Tubg1    | 0.204 | 0.400 | -0.306 | 0.000  | 0.031  | -0.359 | -0.367 | -0.142 |
| Q7TPN9 | Prr14    | 0.091 | 0.231 | -0.071 | 0.000  | 0.554  | -0.152 | -0.582 | -0.336 |
| Q6ZQE4 | Nemp1    | 0.975 | 1.000 | 0.000  | -0.209 | 0.239  | 0.125  | -0.173 | 0.093  |
| Q9QYR6 | Map1a    | 0.277 | 0.498 | -1.020 | 0.047  | 0.000  | -0.594 | -0.990 | -0.769 |
| Q8K296 | Mttr3    | 0.128 | 0.290 | 0.000  | 0.462  | -0.686 | -0.643 | -0.845 | -0.685 |
| Q68FE8 | Znf280d  | 0.869 | 1.000 | 0.000  | -3.330 | 0.418  | -1.590 | -1.570 | -0.412 |
| Q3TQB2 | Foxred1  | 0.796 | 1.000 | -0.086 | 0.930  | 0.000  | 0.212  | 0.095  | 0.873  |
| Q9WU62 | Incenp   | 0.140 | 0.306 | 0.524  | 0.000  | -0.282 | -0.029 | -0.934 | -0.856 |
| Q9CQ91 | Ndufa3   | 0.595 | 0.868 | -0.286 | 0.062  | 0.000  | 0.320  | -0.326 | 0.166  |
| Q8CIG8 | Prmt5    | 0.035 | 0.124 | 0.000  | 0.259  | -0.546 | -0.723 | -1.530 | -1.800 |
| P30677 | Gna14    | 0.352 | 0.593 | 0.000  | 2.050  | -0.325 | 3.440  | 0.286  | 1.720  |
| Q8C5P5 | Nt5dc1   | 0.002 | 0.025 | -0.291 | 0.000  | 0.247  | -1.180 | -1.430 | -1.520 |
| P30285 | Cdk4     | 0.927 | 1.000 | -1.000 | 0.000  | 0.348  | 0.457  | -0.400 | -0.875 |
| Q99JW2 | Acy1     | 0.219 | 0.418 | -1.060 | 3.310  | 0.000  | -0.115 | -1.590 | -2.610 |
| Q9CS42 | Prps2    | 0.013 | 0.070 | 0.016  | -0.356 | 0.000  | -0.738 | -1.420 | -1.340 |
| P23772 | Gata3    | 0.502 | 0.767 | -6.200 | 0.000  | 0.195  | -0.520 | -0.462 | -0.382 |
| Q8BGR9 | Ublcp1   | 0.647 | 0.923 | 0.155  | -1.020 | 0.000  | -0.287 | -0.813 | -0.360 |
| Q9EQG9 | Col4a3bp | 0.061 | 0.177 | 0.743  | 0.000  | -0.010 | -0.270 | -1.100 | -0.586 |
| Q99KW3 | Triobp   | 0.447 | 0.704 | 1.350  | 0.000  | -0.569 | 1.560  | 0.174  | 0.802  |
| P49446 | Ptpre    | 0.361 | 0.607 | 0.248  | 0.000  | -0.421 | 0.026  | -0.348 | -0.818 |
| P81069 | Gabpb2   | 0.101 | 0.247 | -0.582 | 0.000  | 0.001  | -0.633 | -0.904 | -0.497 |
| Q9CPR8 | Nsmce3   | 0.214 | 0.411 | 0.219  | -0.997 | 0.000  | -0.521 | -1.170 | -0.944 |
| Q99N95 | Mrpl3    | 0.067 | 0.187 | 0.000  | 0.558  | -0.395 | 1.000  | 0.576  | 0.857  |
| Q9R1C0 | Taf7     | 0.309 | 0.542 | 0.000  | 0.218  | -0.124 | -0.012 | -0.048 | -0.424 |
| Q9QZS3 | Numb     | 0.846 | 1.000 | 0.000  | -2.960 | 1.490  | -1.000 | -0.066 | 0.457  |

|        |        |       |       |        |        |        |        |        |        |
|--------|--------|-------|-------|--------|--------|--------|--------|--------|--------|
| Q9JIB4 | Gtf2h2 | 0.243 | 0.453 | 0.000  | -0.382 | 0.134  | -0.180 | -1.860 | -0.442 |
| Q9DB10 | Smdt1  | 0.087 | 0.224 | -0.402 | 0.296  | 0.000  | 0.541  | 0.458  | 0.326  |
| A2A6Q5 | Cdc27  | 0.004 | 0.038 | 0.037  | 0.000  | -0.024 | 1.120  | 0.633  | 0.785  |
| Q8CG50 | Rab43  | 0.799 | 1.000 | -3.230 | 0.000  | 0.170  | 0.428  | -0.190 | -4.960 |
| O88796 | Rpp30  | 0.185 | 0.374 | 0.000  | 0.657  | -0.507 | 1.050  | 0.269  | 0.787  |

**Supplementary Table 2.** T cell exhaustion associated proteins detected in CD4+ T cells from old mice with or without mito-transfer. CD4+ T cells from young and old mice, and from old mice after mito-transfer were cultured for 4 h before processing for mass spectrometry analysis. Data expressed as median protein Log2 fold change of CD4+ T cells from old mice, from 3 individual old mice (paired experiment).

| GO            | Category    | Description                                                              | Count | %     | Log10(P) | Log10(q) |
|---------------|-------------|--------------------------------------------------------------------------|-------|-------|----------|----------|
| GO:0045333    | GO BP       | cellular respiration                                                     | 37    | 12.71 | -31.24   | -26.97   |
| mmu04141      | KEGG        | Protein processing in endoplasmic reticulum - Mus musculus (house mouse) | 29    | 9.97  | -22.64   | -19.77   |
| mmu00100      | KEGG        | Steroid biosynthesis - Mus musculus (house mouse)                        | 9     | 3.09  | -11.64   | -9.19    |
| R-MMU-1592230 | Reactome    | Mitochondrial biogenesis                                                 | 9     | 3.09  | -10.23   | -7.82    |
| GO:0006637    | GO BP       | acyl-CoA metabolic process                                               | 13    | 4.47  | -9.97    | -7.57    |
| GO:0061024    | GO BP       | membrane organization                                                    | 34    | 11.68 | -9.92    | -7.53    |
| GO:0006457    | GO BP       | protein folding                                                          | 17    | 5.84  | -9.74    | -7.36    |
| GO:0043603    | GO BP       | amide metabolic process                                                  | 35    | 12.03 | -8.81    | -6.49    |
| GO:0090150    | GO BP       | establishment of protein localization to membrane                        | 18    | 6.19  | -8.81    | -6.49    |
| mmu01200      | KEGG        | Carbon metabolism - Mus musculus (house mouse)                           | 13    | 4.47  | -7.9     | -5.62    |
| GO:0018126    | GO BP       | protein hydroxylation                                                    | 7     | 2.41  | -7.1     | -4.84    |
| WP662         | WikiPathway | Amino acid metabolism                                                    | 11    | 3.78  | -7.06    | -4.81    |
| CORUM:413     | CORUM       | (ER)-localized multiprotein complex, Ig heavy chains associated          | 5     | 1.72  | -6.95    | -4.7     |
| GO:0007007    | GO BP       | inner mitochondrial membrane organization                                | 7     | 2.41  | -6.66    | -4.44    |
| GO:0098660    | GO BP       | inorganic ion transmembrane transport                                    | 26    | 8.93  | -6.59    | -4.37    |
| GO:0034976    | GO BP       | response to endoplasmic reticulum stress                                 | 15    | 5.15  | -6.12    | -3.96    |
| R-MMU-8949664 | Reactome    | Processing of SMDT1                                                      | 5     | 1.72  | -5.74    | -3.6     |
| GO:0031647    | GO BP       | regulation of protein stability                                          | 17    | 5.84  | -5.7     | -3.57    |
| GO:0006851    | GO BP       | mitochondrial calcium ion transmembrane transport                        | 5     | 1.72  | -5.59    | -3.48    |
| GO:1902930    | GO BP       | regulation of alcohol biosynthetic process                               | 7     | 2.41  | -5.11    | -3.03    |

**Supplementary Table 3.** The Top 20 processes of significantly upregulated DEPs in CD4+ T cells from old mice, with or without mito-transfer in relation to T Cell exhaustion. Data generated through Pathway & Process Enrichment (PPE) analysis using the Metascape analysis platform.



| <b>GO</b>     | <b>Description</b>                                             | <b>Log10(P)</b> |
|---------------|----------------------------------------------------------------|-----------------|
| GO:0045333    | cellular respiration                                           | -33.8           |
| R-MMU-1428517 | The citric acid (TCA) cycle and respiratory electron transport | -33.3           |
| GO:0009060    | aerobic respiration                                            | -32.8           |

**Supplementary Table 4.** The Top 3 Protein-Protein Interaction (PPI) networks in CD4+ T cells from old mice, with or without mito-transfer, in relation to T Cell exhaustion. Data generated using the Metascape analysis platform.

| MCODE    | GO            | Description                                                                                                         | Log10(P) |
|----------|---------------|---------------------------------------------------------------------------------------------------------------------|----------|
| MCODE_1  | R-MMU-163200  | Respiratory electron transport, ATP synthesis by chemiosmotic coupling, and heat production by uncoupling proteins. | -48.1    |
| MCODE_1  | mmu00190      | Oxidative phosphorylation - Mus musculus (house mouse)                                                              | -46.8    |
| MCODE_1  | WP295         | Electron transport chain                                                                                            | -46.8    |
| MCODE_2  | GO:0032543    | mitochondrial translation                                                                                           | -22.7    |
| MCODE_2  | R-MMU-5389840 | Mitochondrial translation elongation                                                                                | -21.6    |
| MCODE_2  | R-MMU-5419276 | Mitochondrial translation termination                                                                               | -21.4    |
| MCODE_3  | mmu04141      | Protein processing in endoplasmic reticulum - Mus musculus (house mouse)                                            | -21      |
| MCODE_3  | mmu00513      | Various types of N-glycan biosynthesis - Mus musculus (house mouse)                                                 | -17      |
| MCODE_3  | GO:0018279    | protein N-linked glycosylation via asparagine                                                                       | -16.5    |
| MCODE_4  | GO:0071681    | cellular response to indole-3-methanol                                                                              | -9.1     |
| MCODE_4  | GO:0071680    | response to indole-3-methanol                                                                                       | -9.1     |
| MCODE_4  | mmu05200      | Pathways in cancer - Mus musculus (house mouse)                                                                     | -9.1     |
| MCODE_5  | GO:0030036    | actin cytoskeleton organization                                                                                     | -4.6     |
| MCODE_5  | GO:0030029    | actin filament-based process                                                                                        | -4.4     |
| MCODE_5  | mmu04510      | Focal adhesion - Mus musculus (house mouse)                                                                         | -4.3     |
| MCODE_6  | mmu00280      | Valine, leucine and isoleucine degradation - Mus musculus (house mouse)                                             | -8.8     |
| MCODE_7  | mmu04141      | Protein processing in endoplasmic reticulum - Mus musculus (house mouse)                                            | -12.6    |
| MCODE_7  | GO:0006457    | protein folding                                                                                                     | -7.2     |
| MCODE_7  | GO:0034976    | response to endoplasmic reticulum stress                                                                            | -6.7     |
| MCODE_8  | mmu00100      | Steroid biosynthesis - Mus musculus (house mouse)                                                                   | -18.5    |
| MCODE_8  | R-MMU-191273  | Cholesterol biosynthesis                                                                                            | -17.5    |
| MCODE_8  | GO:1902653    | secondary alcohol biosynthetic process                                                                              | -16.4    |
| MCODE_9  | GO:0009060    | aerobic respiration                                                                                                 | -10.7    |
| MCODE_9  | R-MMU-1428517 | The citric acid (TCA) cycle and respiratory electron transport                                                      | -10.6    |
| MCODE_9  | GO:0009152    | purine ribonucleotide biosynthetic process                                                                          | -10.5    |
| MCODE_10 | mmu04141      | Protein processing in endoplasmic reticulum - Mus musculus (house mouse)                                            | -5.7     |
| MCODE_11 | WP103         | Cholesterol biosynthesis                                                                                            | -8.9     |
| MCODE_11 | mmu00100      | Steroid biosynthesis - Mus musculus (house mouse)                                                                   | -8.5     |
| MCODE_11 | R-MMU-191273  | Cholesterol biosynthesis                                                                                            | -8.1     |
| MCODE_12 | R-MMU-1650814 | Collagen biosynthesis and modifying enzymes                                                                         | -7.7     |
| MCODE_12 | mmu00310      | Lysine degradation - Mus musculus (house mouse)                                                                     | -7.6     |
| MCODE_12 | R-MMU-1474290 | Collagen formation                                                                                                  | -7.4     |
| MCODE_13 | GO:0010817    | regulation of hormone levels                                                                                        | -4.6     |
| MCODE_13 | GO:0014070    | response to organic cyclic compound                                                                                 | -4.3     |
| MCODE_14 | GO:0006457    | protein folding                                                                                                     | -6.3     |
| MCODE_14 | GO:0051604    | protein maturation                                                                                                  | -5       |

**Supplementary Table 5.** The MCODE networks identified for significantly upregulated DEPs in CD4+ T cells from old mice, with or without mito-transfer, in relation to T Cell exhaustion. Data generated using the Metascape analysis platform.

| GO            | Category    | Description                                                         | Count | %     | Log10(P) | Log10(q) |
|---------------|-------------|---------------------------------------------------------------------|-------|-------|----------|----------|
| R-MMU-8953854 | Reactome    | Metabolism of RNA                                                   | 55    | 19.57 | -29.98   | -25.71   |
| R-MMU-450531  | Reactome    | Regulation of mRNA stability by proteins that bind AU-rich elements | 23    | 8.19  | -23.34   | -19.38   |
| mmu00010      | KEGG        | Glycolysis / Gluconeogenesis - Mus musculus (house mouse)           | 11    | 3.91  | -8.91    | -6.72    |
| R-MMU-6798695 | Reactome    | Neutrophil degranulation                                            | 27    | 9.61  | -8.71    | -6.53    |
| GO:0030029    | GO BP       | actin filament-based process                                        | 28    | 9.96  | -8.37    | -6.2     |
| GO:0034655    | GO BP       | nucleobase-containing compound catabolic process                    | 18    | 6.41  | -7.59    | -5.44    |
| mmu00270      | KEGG        | Cysteine and methionine metabolism - Mus musculus (house mouse)     | 9     | 3.2   | -7.38    | -5.24    |
| GO:0050684    | GO BP       | regulation of mRNA processing                                       | 13    | 4.63  | -7.35    | -5.22    |
| GO:0098761    | GO BP       | cellular response to interleukin-7                                  | 6     | 2.14  | -7.25    | -5.13    |
| WP572         | WikiPathway | EGFR1 signaling pathway                                             | 14    | 4.98  | -7.01    | -4.92    |
| R-MMU-194315  | Reactome    | Signaling by Rho GTPases                                            | 25    | 8.9   | -6.68    | -4.6     |
| GO:0010563    | GO BP       | negative regulation of phosphorus metabolic process                 | 21    | 7.47  | -6.47    | -4.4     |
| GO:0052548    | GO BP       | regulation of endopeptidase activity                                | 19    | 6.76  | -6.41    | -4.34    |
| GO:0044283    | GO BP       | small molecule biosynthetic process                                 | 20    | 7.12  | -5.57    | -3.56    |
| GO:0031123    | GO BP       | RNA 3'-end processing                                               | 9     | 3.2   | -5.51    | -3.51    |
| WP2185        | WikiPathway | Purine metabolism                                                   | 12    | 4.27  | -5.47    | -3.47    |
| WP387         | WikiPathway | IL-6 signaling pathway                                              | 9     | 3.2   | -5.16    | -3.19    |
| R-MMU-109606  | Reactome    | Intrinsic Pathway for Apoptosis                                     | 6     | 2.14  | -5       | -3.04    |
| GO:0071364    | GO BP       | cellular response to epidermal growth factor stimulus               | 6     | 2.14  | -5       | -3.04    |
| GO:0022613    | GO BP       | ribonucleoprotein complex biogenesis                                | 18    | 6.41  | -4.75    | -2.82    |

**Supplementary Table 6.** The Top 20 processes of significantly downregulated DEPs in CD4+ T cells from old mice, with or without mito-transfer, in relation to T Cell exhaustion. Data generated through Pathway & Process Enrichment (PPE) analysis using the Metascape analysis platform.

| GO            | Description                                                         | Log10(P) |
|---------------|---------------------------------------------------------------------|----------|
| R-MMU-8953854 | Metabolism of RNA                                                   | -30.6    |
| R-MMU-450531  | Regulation of mRNA stability by proteins that bind AU-rich elements | -24.5    |
| R-MMU-1236978 | Cross-presentation of soluble exogenous antigens (endosomes)        | -22      |

**Supplementary Table 7.** The Top 3 Protein-Protein Interaction (PPI) networks of significantly downregulated DEPs in CD4+ T cells from old mice, with or without mito-transfer, in relation to T Cell exhaustion. Data generated using the Metascape analysis platform.

| MCODE    | GO            | Description                                                    | Log10(P) |
|----------|---------------|----------------------------------------------------------------|----------|
| MCODE_1  | R-MMU-1169091 | Activation of NF-kappaB in B cells                             | -47      |
| MCODE_1  | R-MMU-1234176 | hydroxylation of Hypoxia-inducible Factor Alpha                | -46.5    |
| MCODE_1  | R-MMU-1234174 | Cellular response to hypoxia                                   | -46      |
| MCODE_2  | mmu00010      | Glycolysis / Gluconeogenesis - Mus musculus (house mouse)      | -13.4    |
| MCODE_2  | WP157         | Glycolysis and gluconeogenesis                                 | -9.5     |
| MCODE_2  | GO:0006007    | glucose catabolic process                                      | -8.5     |
| MCODE_3  | R-MMU-75035   | Chk1/Chk2(Cds1) mediated inactivation of Cyclin B:Cdk1 complex | -10      |
| MCODE_3  | R-MMU-111447  | mitochondria                                                   | -10      |
| MCODE_3  | R-MMU-114452  | Activation of BH3-only proteins                                | -9.2     |
| MCODE_4  | mmu03040      | mouse)                                                         | -17      |
| MCODE_4  | R-MMU-72163   | mRNA Splicing - Major Pathway                                  | -16.7    |
| MCODE_4  | R-MMU-72172   | mRNA Splicing                                                  | -16.6    |
| MCODE_5  | GO:1902115    | regulation of organelle assembly                               | -3.7     |
| MCODE_5  | GO:0032535    | regulation of cellular component size                          | -3       |
| MCODE_5  | GO:0043254    | complex assembly                                               | -2.9     |
| MCODE_6  | GO:0016051    | carbohydrate biosynthetic process                              | -4.6     |
| MCODE_6  | GO:0006006    | glucose metabolic process                                      | -4.5     |
| MCODE_6  | GO:0019318    | hexose metabolic process                                       | -4.2     |
| MCODE_7  | WP407         | Kit receptor signaling pathway                                 | -8.9     |
| MCODE_7  | mmu04658      | Th1 and Th2 cell differentiation - Mus musculus (house mouse)  | -8.4     |
| MCODE_7  | R-MMU-8854691 | Interleukin-20 family signaling                                | -8.3     |
| MCODE_8  | R-MMU-6807505 | genes                                                          | -9.2     |
| MCODE_8  | GO:0006366    | transcription by RNA polymerase II                             | -6.5     |
| MCODE_8  | GO:0006351    | DNA-templated transcription                                    | -5.9     |
| MCODE_9  | GO:0097435    | supramolecular fiber organization                              | -4.1     |
| MCODE_10 | R-MMU-6791226 | Major pathway of rRNA processing in the nucleolus and cytosol  | -6.2     |
| MCODE_10 | R-MMU-72312   | rRNA processing                                                | -6.2     |
| MCODE_10 | R-MMU-8868773 | cytosol                                                        | -6.2     |

**Supplementary Table 8.** The MCODE networks identified significantly downregulated DEPs in CD4+ T cells from old mice, with or without mito-transfer, in relation to T Cell exhaustion. Data generated using the Metascape analysis platform.

| Uniprot ID | Gene Symbol | t-test | FDR (adj. P-val.) | O1     | O2     | O3     | OM1    | OM2    | OM3    |
|------------|-------------|--------|-------------------|--------|--------|--------|--------|--------|--------|
| P16125     | Ldhd        | 0.000  | 0.013             | -0.212 | 0.132  | 0.000  | -1.330 | -1.570 | -1.550 |
| P08228     | Sod1        | 0.000  | 0.013             | -0.224 | 0.010  | 0.000  | -1.080 | -1.290 | -1.170 |
| Q922W5     | Pycr1       | 0.000  | 0.014             | 0.208  | 0.000  | -0.219 | 2.510  | 1.920  | 2.420  |
| P63101     | Ywhaz       | 0.001  | 0.015             | 0.000  | -0.021 | 0.113  | -1.140 | -1.610 | -1.370 |
| P06151     | Ldha        | 0.001  | 0.018             | -0.165 | 0.115  | 0.000  | -0.980 | -1.190 | -0.934 |
| Q9DB20     | Atp5o       | 0.001  | 0.019             | 0.000  | 0.129  | -0.067 | 0.904  | 0.673  | 0.901  |
| P23506     | Pcmt1       | 0.001  | 0.022             | -0.179 | 0.000  | 0.198  | -0.923 | -0.926 | -0.835 |
| Q8R0F3     | Sumf1       | 0.002  | 0.024             | 0.000  | 0.232  | -0.568 | 1.860  | 1.650  | 1.660  |
| Q01853     | Vcp         | 0.002  | 0.025             | 0.000  | 0.056  | -0.134 | -0.465 | -0.616 | -0.590 |
| P17182     | Eno1        | 0.002  | 0.028             | 0.055  | -0.141 | 0.000  | -0.948 | -1.530 | -1.280 |
| P48678     | Lmna        | 0.002  | 0.028             | 0.000  | 0.046  | -0.348 | 0.967  | 0.745  | 0.972  |
| P35235     | Ptpn11      | 0.002  | 0.029             | -0.286 | 0.010  | 0.000  | -0.906 | -1.190 | -0.916 |
| Q04207     | Rela        | 0.003  | 0.030             | 0.000  | -0.006 | 0.032  | -0.840 | -1.440 | -1.170 |
| P27641     | Xrcc5       | 0.003  | 0.030             | -0.102 | 0.000  | 0.052  | -1.050 | -1.770 | -1.530 |
| P28474     | Adh5        | 0.003  | 0.032             | -0.238 | 0.142  | 0.000  | -1.150 | -1.810 | -1.400 |
| Q62077     | Plcg1       | 0.003  | 0.033             | -0.125 | 0.000  | 0.471  | -1.190 | -1.370 | -1.750 |
| P19157     | Gstp1       | 0.004  | 0.036             | -0.138 | 0.000  | 0.106  | -1.050 | -1.380 | -0.809 |
| P00493     | Hprt1       | 0.004  | 0.038             | 0.000  | 0.060  | -0.208 | -1.260 | -1.950 | -1.240 |
| Q9QXS6     | Dbn1        | 0.005  | 0.039             | -1.190 | 2.450  | 0.000  | 7.040  | 6.310  | 6.710  |
| Q9R1E0     | Foxo1       | 0.005  | 0.039             | -0.131 | 0.075  | 0.000  | -0.360 | -0.460 | -0.388 |
| Q60631     | Grb2        | 0.005  | 0.041             | -0.091 | 0.403  | 0.000  | -1.080 | -1.510 | -0.944 |
| P52431     | Pold1       | 0.005  | 0.043             | -0.206 | 0.235  | 0.000  | -0.797 | -1.220 | -0.903 |
| P63038     | Hspd1       | 0.006  | 0.044             | 0.000  | 0.119  | -0.240 | 1.090  | 0.650  | 0.822  |
| P42232     | Stat5b      | 0.007  | 0.048             | -0.226 | 0.000  | 0.150  | -0.984 | -1.490 | -0.914 |
| P63017     | Hspa8       | 0.008  | 0.054             | 0.046  | 0.000  | -0.090 | -0.386 | -0.759 | -0.718 |
| P23475     | Xrcc6       | 0.009  | 0.056             | 0.040  | 0.000  | -0.446 | -0.978 | -1.630 | -1.300 |
| O08734     | Bak1        | 0.010  | 0.060             | 0.000  | 0.028  | -0.547 | 0.687  | 0.764  | 0.655  |
| Q9D666     | Sun1        | 0.011  | 0.064             | -0.159 | 0.054  | 0.000  | 0.644  | 0.375  | 0.368  |
| Q06890     | Clu         | 0.014  | 0.073             | 0.000  | 0.199  | -0.686 | -1.550 | -2.880 | -1.990 |
| P42230     | Stat5a      | 0.015  | 0.076             | -0.331 | 0.072  | 0.000  | -0.731 | -1.550 | -1.370 |
| Q8R4K2     | Irak4       | 0.016  | 0.078             | 0.152  | 0.000  | -0.178 | -0.685 | -1.670 | -1.410 |
| P10639     | Txn         | 0.016  | 0.079             | 0.196  | -0.365 | 0.000  | -0.914 | -2.060 | -1.810 |
| P25799     | Nfkb1       | 0.017  | 0.080             | 0.000  | -0.065 | 0.139  | -0.430 | -1.120 | -0.909 |
| P47791     | Gsr         | 0.018  | 0.084             | 0.341  | 0.000  | -0.118 | -0.466 | -1.080 | -1.080 |
| P07901     | Hsp90aa1    | 0.021  | 0.090             | 0.000  | 0.010  | -0.335 | -0.557 | -1.180 | -1.010 |
| P09671     | Sod2        | 0.023  | 0.096             | -0.061 | 0.348  | 0.000  | 0.715  | 0.476  | 0.682  |
| P70371     | Terf1       | 0.025  | 0.102             | 0.000  | 0.395  | -0.619 | -1.120 | -1.050 | -1.160 |
| P39428     | Traf1       | 0.026  | 0.103             | 0.000  | 0.232  | -0.135 | -0.817 | -1.800 | -0.841 |
| P28352     | Apex1       | 0.028  | 0.107             | 0.000  | -0.288 | 0.047  | -0.452 | -0.881 | -0.582 |
| Q03147     | Cdk7        | 0.029  | 0.110             | 0.000  | -0.008 | 0.017  | -0.257 | -0.564 | -0.237 |
| P20444     | Prkca       | 0.030  | 0.113             | -0.268 | 0.109  | 0.000  | -0.390 | -0.460 | -0.434 |
| P35821     | Ptpn1       | 0.031  | 0.116             | -0.040 | 0.235  | 0.000  | -0.162 | -0.284 | -0.302 |
| P12023     | App         | 0.032  | 0.117             | 4.640  | -1.820 | 0.000  | 7.180  | 7.130  | 7.230  |
| P63166     | Sumo1       | 0.032  | 0.119             | -0.103 | 0.000  | 0.363  | -0.366 | -0.411 | -0.342 |
| Q9QVP9     | Ptk2b       | 0.038  | 0.131             | -1.180 | 0.133  | 0.000  | -1.480 | -1.840 | -1.650 |
| P43404     | Zap70       | 0.038  | 0.131             | -0.465 | 0.041  | 0.000  | -0.669 | -0.946 | -0.589 |
| Q9Z2A7     | Dgat1       | 0.041  | 0.136             | 0.000  | 0.214  | -0.404 | 0.617  | 0.361  | 0.650  |
| P06537     | Nr3c1       | 0.043  | 0.141             | -0.291 | 0.000  | 0.306  | -0.491 | -0.996 | -0.556 |
| P16858     | Gapdh       | 0.043  | 0.142             | -0.051 | 0.026  | 0.000  | -0.153 | -0.557 | -0.357 |
| P24270     | Cat         | 0.046  | 0.148             | 0.177  | 0.000  | -0.253 | 1.040  | 0.403  | 0.494  |
| Q8BKJ9     | Sirt7       | 0.048  | 0.152             | 0.000  | -0.263 | 0.089  | -0.314 | -0.839 | -0.582 |
| Q60520     | Sin3a       | 0.049  | 0.154             | -0.146 | 0.000  | 0.086  | -0.240 | -0.604 | -0.309 |
| P04202     | Tgfb1       | 0.054  | 0.163             | 0.000  | 0.044  | -0.363 | -0.731 | -0.344 | -0.794 |
| P14733     | Lmnb1       | 0.060  | 0.175             | -0.138 | 0.000  | 0.107  | -0.348 | -0.608 | -0.184 |
| P33609     | Pola1       | 0.060  | 0.176             | 0.058  | 0.000  | -0.834 | -1.570 | -1.450 | -0.752 |

|        |          |       |       |        |        |        |        |        |        |
|--------|----------|-------|-------|--------|--------|--------|--------|--------|--------|
| O09172 | Gclm     | 0.514 | 0.778 | 0.497  | 0.000  | -0.914 | 0.147  | -0.892 | -0.812 |
| Q9QXS6 | Dbn1     | 0.005 | 0.039 | -1.190 | 2.450  | 0.000  | 7.040  | 6.310  | 6.710  |
| Q80W54 | Zmpste24 | 0.080 | 0.211 | 0.027  | 0.000  | -0.220 | 0.715  | 0.060  | 0.482  |
| P11103 | Parp1    | 0.506 | 0.770 | -0.125 | 0.040  | 0.000  | -0.190 | -0.321 | 0.120  |
| P11352 | Gpx1     | 0.131 | 0.294 | 0.457  | 0.000  | -0.235 | -0.028 | -0.804 | -0.877 |
| Q04750 | Top1     | 0.149 | 0.319 | 0.118  | -0.057 | 0.000  | -0.028 | -0.407 | -0.160 |
| P39749 | Fen1     | 0.169 | 0.351 | 0.002  | -0.215 | 0.000  | -0.243 | -0.778 | -0.197 |
| Q9CQB5 | Cisd2    | 0.179 | 0.365 | 0.000  | 0.161  | -0.086 | 0.224  | 0.101  | 0.145  |
| P07901 | Hsp90aa1 | 0.021 | 0.090 | 0.000  | 0.010  | -0.335 | -0.557 | -1.180 | -1.010 |
| Q02111 | Prkcq    | 0.722 | 1.000 | 0.000  | 1.430  | -0.213 | -0.229 | 0.752  | 0.016  |
| Q60631 | Grb2     | 0.005 | 0.041 | -0.091 | 0.403  | 0.000  | -1.080 | -1.510 | -0.944 |
| P42230 | Stat5a   | 0.015 | 0.076 | -0.331 | 0.072  | 0.000  | -0.731 | -1.550 | -1.370 |
| P17918 | Pcna     | 0.142 | 0.309 | 0.516  | 0.000  | -0.203 | -0.004 | -0.794 | -0.676 |
| Q8BKJ9 | Sirt7    | 0.048 | 0.152 | 0.000  | -0.263 | 0.089  | -0.314 | -0.839 | -0.582 |
| P09671 | Sod2     | 0.023 | 0.096 | -0.061 | 0.348  | 0.000  | 0.715  | 0.476  | 0.682  |
| P52431 | Pold1    | 0.005 | 0.043 | -0.206 | 0.235  | 0.000  | -0.797 | -1.220 | -0.903 |
| P23475 | Xrcc6    | 0.009 | 0.056 | 0.040  | 0.000  | -0.446 | -0.978 | -1.630 | -1.300 |
| P98083 | Shc1     | 0.721 | 1.000 | 0.042  | -0.011 | 0.000  | 1.180  | -0.727 | 0.209  |
| P35700 | Prdx1    | 0.130 | 0.293 | 0.028  | 0.000  | -0.030 | 0.421  | -0.006 | 0.325  |
| P70399 | Tp53bp1  | 0.062 | 0.178 | 0.267  | 0.000  | -0.013 | -0.418 | -1.440 | -0.510 |
| Q9Z2A7 | Dgat1    | 0.041 | 0.136 | 0.000  | 0.214  | -0.404 | 0.617  | 0.361  | 0.650  |
| P63280 | Ube2i    | 0.764 | 1.000 | 0.000  | 0.245  | -0.255 | -0.134 | -0.038 | 0.016  |
| Q04207 | Rela     | 0.003 | 0.030 | 0.000  | -0.006 | 0.032  | -0.840 | -1.440 | -1.170 |
| P16125 | Ldhd     | 0.000 | 0.013 | -0.212 | 0.132  | 0.000  | -1.330 | -1.570 | -1.550 |
| Q99J62 | Rfc4     | 0.246 | 0.457 | 0.532  | -0.054 | 0.000  | 0.414  | -0.865 | -1.300 |
| Q08481 | Pecam1   | 0.631 | 0.907 | 0.000  | 1.060  | -0.637 | -0.841 | 0.355  | -0.038 |
| Q6GQT1 | A2m      | 0.349 | 0.590 | 0.000  | -0.058 | 0.442  | 0.387  | 0.048  | 0.814  |
| Q8K3H0 | App1     | 0.122 | 0.280 | -0.019 | 0.000  | 0.087  | 0.005  | -0.899 | -0.625 |
| P42232 | Stat5b   | 0.007 | 0.048 | -0.226 | 0.000  | 0.150  | -0.984 | -1.490 | -0.914 |
| Q9QVP9 | Ptk2b    | 0.038 | 0.131 | -1.180 | 0.133  | 0.000  | -1.480 | -1.840 | -1.650 |
| Q9R1E0 | Foxo1    | 0.005 | 0.039 | -0.131 | 0.075  | 0.000  | -0.360 | -0.460 | -0.388 |
| P01901 | H2-K1    | 0.918 | 1.000 | 0.000  | 1.100  | -0.068 | -0.245 | 0.777  | 0.664  |
| P29533 | Vcam1    | 0.146 | 0.315 | 0.746  | 0.000  | -0.120 | 0.114  | -1.040 | -0.893 |
| Q62388 | Atm      | 0.107 | 0.257 | -0.265 | 0.116  | 0.000  | -0.451 | -1.290 | -0.368 |
| P62137 | Ppp1ca   | 0.822 | 1.000 | 0.237  | -0.916 | 0.000  | -0.030 | -0.612 | -0.318 |
| P20444 | Prkca    | 0.030 | 0.113 | -0.268 | 0.109  | 0.000  | -0.390 | -0.460 | -0.434 |
| P41245 | Mmp9     | 0.231 | 0.435 | 2.280  | 0.000  | -0.046 | 0.785  | -1.710 | -1.570 |
| Q03147 | Cdk7     | 0.029 | 0.110 | 0.000  | -0.008 | 0.017  | -0.257 | -0.564 | -0.237 |
| P10126 | Eef1a1   | 0.463 | 0.721 | 0.222  | -0.135 | 0.000  | 0.343  | -0.593 | -0.404 |
| P28474 | Adh5     | 0.003 | 0.032 | -0.238 | 0.142  | 0.000  | -1.150 | -1.810 | -1.400 |
| P10639 | Txn      | 0.016 | 0.079 | 0.196  | -0.365 | 0.000  | -0.914 | -2.060 | -1.810 |
| P47791 | Gsr      | 0.018 | 0.084 | 0.341  | 0.000  | -0.118 | -0.466 | -1.080 | -1.080 |
| P68181 | Prkacb   | 0.979 | 1.000 | -1.250 | 0.245  | 0.000  | -0.353 | -0.234 | -0.378 |
| Q8R0F3 | Sumf1    | 0.002 | 0.024 | 0.000  | 0.232  | -0.568 | 1.860  | 1.650  | 1.660  |
| Q8VEE4 | Rpa1     | 0.072 | 0.197 | 0.054  | -0.271 | 0.000  | -0.678 | -1.690 | -0.560 |
| P97313 | Prkdc    | 0.549 | 0.818 | 0.000  | -0.329 | 0.216  | -0.441 | -0.410 | 0.217  |
| P04202 | Tgfb1    | 0.054 | 0.163 | 0.000  | 0.044  | -0.363 | -0.731 | -0.344 | -0.794 |
| P12023 | App      | 0.032 | 0.117 | 4.640  | -1.820 | 0.000  | 7.180  | 7.130  | 7.230  |
| O35144 | Terf2    | 0.061 | 0.176 | -0.147 | 0.408  | 0.000  | -0.504 | -0.507 | -0.217 |
| P60766 | Cdc42    | 0.652 | 0.928 | 0.377  | -0.109 | 0.000  | 0.126  | -0.409 | 0.199  |
| Q9JLN9 | Mtor     | 0.116 | 0.271 | 0.095  | 0.000  | -0.092 | -0.022 | -0.391 | -0.444 |
| P28798 | Grn      | 0.144 | 0.311 | 0.111  | 0.000  | -1.300 | -0.647 | -1.980 | -2.100 |
| Q5DW34 | Ehmt1    | 0.432 | 0.687 | 0.000  | -0.729 | 0.184  | -0.148 | -1.100 | -0.351 |
| P17879 | Hspa1b   | 0.401 | 0.652 | 0.000  | -1.290 | 0.818  | 0.709  | 0.226  | 0.366  |
| P08226 | ApoE     | 0.508 | 0.772 | 0.861  | -0.299 | 0.000  | 0.960  | 0.161  | 0.360  |
| Q63844 | Mapk3    | 0.097 | 0.239 | 0.625  | -0.043 | 0.000  | -0.104 | -0.713 | -0.406 |
| Q8K3K7 | Agpat2   | 0.136 | 0.300 | 0.673  | -0.697 | 0.000  | 0.782  | 0.680  | 0.732  |
| Q62077 | Plcg1    | 0.003 | 0.033 | -0.125 | 0.000  | 0.471  | -1.190 | -1.370 | -1.750 |
| P33609 | Pola1    | 0.060 | 0.176 | 0.058  | 0.000  | -0.834 | -1.570 | -1.450 | -0.752 |

|        |        |       |       |        |        |        |        |        |        |
|--------|--------|-------|-------|--------|--------|--------|--------|--------|--------|
| P70371 | Terf1  | 0.025 | 0.102 | 0.000  | 0.395  | -0.619 | -1.120 | -1.050 | -1.160 |
| P25799 | Nfkb1  | 0.017 | 0.080 | 0.000  | -0.065 | 0.139  | -0.430 | -1.120 | -0.909 |
| P28867 | Prkcd  | 0.874 | 1.000 | 0.163  | 0.000  | -1.170 | -0.357 | 0.299  | -1.260 |
| P11440 | Cdk1   | 0.243 | 0.453 | 0.534  | 0.000  | -1.540 | 1.200  | -0.031 | 0.779  |
| P00493 | Hprt1  | 0.004 | 0.038 | 0.000  | 0.060  | -0.208 | -1.260 | -1.950 | -1.240 |
| Q88351 | Ikbkb  | 0.730 | 1.000 | 0.314  | -0.360 | 0.000  | 0.876  | -0.396 | -0.052 |
| P63166 | Sumo1  | 0.032 | 0.119 | -0.103 | 0.000  | 0.363  | -0.366 | -0.411 | -0.342 |
| Q8R4K2 | Irak4  | 0.016 | 0.078 | 0.152  | 0.000  | -0.178 | -0.685 | -1.670 | -1.410 |
| P35991 | Btk    | 0.317 | 0.551 | 0.632  | 0.000  | -0.712 | -0.088 | -0.620 | -0.963 |
| Q925J9 | Med1   | 0.684 | 0.960 | 0.315  | -0.113 | 0.000  | 0.119  | -0.251 | 0.102  |
| Q9D6Y7 | Msra   | 0.068 | 0.189 | 0.549  | -0.217 | 0.000  | -0.252 | -0.768 | -0.814 |
| Q60848 | Hells  | 0.176 | 0.360 | 0.617  | -0.364 | 0.000  | 0.051  | -1.150 | -0.971 |
| Q9D1M4 | Eef1e1 | 0.658 | 0.934 | 0.000  | 0.081  | -0.123 | 0.368  | -0.741 | -0.135 |
| P08556 | Nras   | 0.188 | 0.378 | -0.332 | 0.239  | 0.000  | 0.065  | 0.343  | 0.475  |
| Q9D666 | Sun1   | 0.011 | 0.064 | -0.159 | 0.054  | 0.000  | 0.644  | 0.375  | 0.368  |
| P34902 | Ii2rg  | 0.090 | 0.230 | -0.469 | 0.000  | 0.113  | -0.901 | -0.440 | -0.531 |
| P97494 | Gclc   | 0.814 | 1.000 | 0.000  | -3.610 | 0.176  | -1.950 | -2.290 | -0.243 |
| Q9WUD1 | Stub1  | 0.453 | 0.711 | 0.263  | 0.000  | -0.427 | -2.900 | 0.114  | 0.084  |
| B2RWS6 | Ep300  | 0.670 | 0.948 | 0.000  | 1.170  | -0.194 | 0.000  | 0.248  | 0.134  |
| Q35904 | Pik3cd | 0.505 | 0.769 | 0.000  | -0.553 | 0.026  | -0.185 | -0.997 | -0.099 |
| Q60974 | Ncor1  | 0.231 | 0.436 | -0.323 | 0.025  | 0.000  | -0.567 | -1.790 | -0.112 |
| Q60855 | Ripk1  | 0.652 | 0.929 | 0.790  | 0.000  | -0.944 | 0.818  | -1.660 | -0.584 |
| Q61510 | Trim25 | 0.944 | 1.000 | -0.760 | 2.540  | 0.000  | 0.403  | -0.707 | 1.800  |
| P23506 | Pcmt1  | 0.001 | 0.022 | -0.179 | 0.000  | 0.198  | -0.923 | -0.926 | -0.835 |
| P39428 | Traf1  | 0.026 | 0.103 | 0.000  | 0.232  | -0.135 | -0.817 | -1.800 | -0.841 |
| Q9Z148 | Ehmt2  | 0.654 | 0.930 | -0.141 | 0.000  | 0.802  | -0.151 | -0.571 | 0.696  |
| P51829 | Adcy7  | 0.555 | 0.824 | -0.535 | 0.000  | 0.058  | -0.200 | -0.585 | -0.144 |
| P63073 | Eif4e  | 0.110 | 0.261 | 0.056  | 0.000  | -0.079 | -0.067 | -0.746 | -0.443 |
| P34152 | Ptk2   | 0.297 | 0.524 | 0.207  | 0.000  | -0.153 | 0.088  | -0.575 | -0.244 |
| O70433 | Fhl2   | 0.300 | 0.529 | 0.301  | -2.800 | 0.000  | 1.230  | -0.207 | 0.303  |
| P47811 | Mapk14 | 0.232 | 0.436 | 0.000  | 0.568  | -0.624 | -3.770 | -0.803 | -0.291 |
| Q61037 | Tsc2   | 0.494 | 0.759 | -0.314 | 0.000  | 0.272  | 0.238  | -0.069 | 0.232  |
| P34884 | Mif    | 0.193 | 0.385 | -0.437 | 0.000  | 0.174  | -0.562 | -4.920 | -1.210 |
| Q06890 | Clu    | 0.014 | 0.073 | 0.000  | 0.199  | -0.686 | -1.550 | -2.880 | -1.990 |
| Q9JIB4 | Gtf2h2 | 0.243 | 0.453 | 0.000  | -0.382 | 0.134  | -0.180 | -1.860 | -0.442 |

**Supplementary Table 9.** Senescence associated proteins detected in CD4+ T cells from old mice with or without mito-transfer. CD4+ T cells from young and old mice, and from old mice after mito-transfer were cultured for 4 h before processing for mass spectrometry analysis. Data expressed as median protein Log2 fold change of CD4+ T cells from old mice, from 3 individual old mice (paired experiment). Differentially expressed proteins (DEPs) with adj. p value > 0.5 are highlighted in orange



| GO           | Category | Description                                             | Count | %     | Log10(P) | Log10(q) |
|--------------|----------|---------------------------------------------------------|-------|-------|----------|----------|
| R-MMU-186763 | Reactome | Downstream signal transduction                          | 4     | 22.22 | -8.2     | -3.99    |
| mmu04066     | KEGG     | HIF-1 signaling pathway - Mus musculus (house mouse)    | 5     | 27.78 | -7.47    | -3.91    |
| GO:2000377   | GO BP    | regulation of reactive oxygen species metabolic process | 4     | 22.22 | -4.97    | -2.31    |
| GO:0006974   | GO BP    | DNA damage response                                     | 6     | 33.33 | -4.62    | -2.02    |
| GO:1903828   | GO BP    | negative regulation of protein localization             | 4     | 22.22 | -4.33    | -1.88    |
| GO:0062197   | GO BP    | cellular response to chemical stress                    | 4     | 22.22 | -4.11    | -1.72    |
| GO:0046434   | GO BP    | organophosphate catabolic process                       | 3     | 16.67 | -3.7     | -1.39    |
| GO:0032496   | GO BP    | response to lipopolysaccharide                          | 4     | 22.22 | -3.58    | -1.3     |
| GO:0062012   | GO BP    | regulation of small molecule metabolic process          | 4     | 22.22 | -3.55    | -1.27    |
| GO:0001819   | GO BP    | positive regulation of cytokine production              | 4     | 22.22 | -3       | -0.85    |
| GO:0002443   | GO BP    | leukocyte mediated immunity                             | 3     | 16.67 | -2.41    | -0.37    |

**Supplementary Table 10.** The Top 20 processes of significantly downregulated DEPs in CD4+ T cells with or without mitochondrial transfer, in relation to T Cell senescence. Data generated using the Metascape analysis platform.

| GO           | Description                    | Log10(P) |
|--------------|--------------------------------|----------|
| R-MMU-186763 | Downstream signal transduction | -8.7     |
| WP373        | IL-3 signaling pathway         | -8.4     |
| WP387        | IL-6 signaling pathway         | -8.4     |

**Supplementary Table 11.** The Top 3 Protein-Protein Interaction (PPI) networks of significantly downregulated DEPs in CD4+ T cells, with or without mito-transfer, in relation to T Cell senescence. Data generated using the Metascape analysis platform.

| <b>MCODE</b> | <b>GO</b>    | <b>Description</b>                                        | <b>Log10(P)</b> |
|--------------|--------------|-----------------------------------------------------------|-----------------|
| MCODE_1      | mmu00010     | Glycolysis / Gluconeogenesis - Mus musculus (house mouse) | -9.3            |
| MCODE_1      | GO:0032787   | monocarboxylic acid metabolic process                     | -7.8            |
| MCODE_1      | mmu00620     | Pyruvate metabolism - Mus musculus (house mouse)          | -7.1            |
| MCODE_2      | R-MMU-186763 | Downstream signal transduction                            | -11.7           |
| MCODE_2      | R-MMU-186797 | Signaling by PDGF                                         | -10.6           |
| MCODE_2      | WP407        | Kit receptor signaling pathway                            | -10             |

**Supplementary Table 12.** The MCODE networks identified significantly downregulated DEPs in CD4+ T cells, with or without mito-transfer, in relation to T Cell senescence. Data generated using the Metascape analysis platform.
